# Supplementary material for: Unraveling the neuroprotective effect of Tinospora cordifolia in Parkinsonian mouse model through proteomics Approach.
Source: Research Square preprint supplement (doi:10.21203/rs.3.rs-151144/v2), 2021-03-22
Supplement: Supplementary file 1 [file 0e30a77dc32ad26de551729c.xlsx]

## Sheet: Sample Information
	SAMPLE INFORMATION
	Sample Received Date:
	Sample Processed Date:	2020-06-01
	Sample Name:	Sample1, Sample 2, Sample 3
	LC conditions	Acquity Waters UPLC system
		75umx150mmx1.7um BEHC18 column
		60 min separation
		buffer A: 0.1% FA and Buffer B: ACN 0.1% FA
	Search Parameters:
		peptide tol(ppm):50
		fragment tol(ppm).:100
		modification:carbamidomethyl_c,oxidation_m,
		missed cleavage : 1
		database: Mus Musculus (Swissprot)
		search engine:PLGS
	An explanation to the headings in the Excel Sheet for Identification are:
	a) Accession No.: The unique identifier by which the Protein is identified in the database: in this case the unique identifier pertains to Uniprot Accession id.
	b) Entry Name: Similar to accession number: but the represenation is in terms of: GeneName_Species
	c) Protein Name
	d) Molecular Weight in Daltons (Proteins original Molecular weight)
	e) pI: Isoelectric point of the protein as obtained from the database.
	f) PLGS Score: Software Scores each protein based on the significance of the Protein being identified (based on MS pattern and MS/MS pattern matching for each peptide, as well as the coverage)
	g) Peptide: The number of peptides identified for the protein.
	h) Theoretical Peptides: The number of theoretical peptides simulated by Trypsin at positions: Arginine and Lysine.
	i) Coverage: Percentage of protein sequence identified by the peptides.
	j) Precursor RMS Mass Error (ppm): The cumulative Mass error for each peptide in terms of m/z ie, (Theoretical m/z - Observed m/z) for the whole protein calculated as Root Mean Square value.
	k) Products: Total number of Fragments in the Peptides identified by the M/Ms fragmentation (b-y ion count)
	l) Modified: Modifications identified: Oxidations and Carbamidomethylation.
	m) Products RMS Mass Error (ppm): The cumulative Mass error for each fragment in terms of m/z ie, (Theoretical m/z - Observed m/z) for the whole protein calculated as Root Mean Square value.
	n) Products RMS RT Error (min): The difference in Retention time Expected for the product v/s observed retention Time (Recorded time on the Detector).
	The Expression Sheet has 4 Headings: The Score is calculated by the Expression Analysis extension of PLGS (ProteinLynx Global Server) Software based on the relevance of the protein present in both the Samples being compared. The last Column describes the Fold Change: The values below 0.5 are considered significantly Under-Regulated and Values above 2 are considered Up-Regulated in the Treated Sam…

## Sheet: Control vs. PD
Accession	Description	Score	Fold change	P values
P40630	Transcription factor A, mitochondrial OS=Mus musculus OX=10090 GN=Tfam PE=1 SV=2	13.77	0.0337087	0
Q60I26	ALS2 C-terminal-like protein OS=Mus musculus OX=10090 GN=Als2cl PE=1 SV=1	34.84	0.103312	0
Q7M6Z4	Kinesin-like protein KIF27 OS=Mus musculus OX=10090 GN=Kif27 PE=1 SV=1	77.06	0.114178	0
Q9D8U2	Transmembrane protein 41A OS=Mus musculus OX=10090 GN=Tmem41a PE=2 SV=1	48.37	0.155673	0
Q8VC28	Aldo-keto reductase family 1 member C13 OS=Mus musculus OX=10090 GN=Akr1c13 PE=1 SV=2	8.74	0.170333	0			Down regulated
Q3TD16	Protein RUBCNL-like OS=Mus musculus OX=10090 GN=Rubcnl PE=1 SV=2	6.94	0.173774	0.02
Q9D4D7	Cell cycle control protein 50C OS=Mus musculus OX=10090 GN=Tmem30c PE=2 SV=2	111.69	0.177284	0
P28481	Collagen alpha-1(II) chain OS=Mus musculus OX=10090 GN=Col2a1 PE=1 SV=2	26.09	0.18452	0
Q8K4P0	pre-mRNA 3' end processing protein WDR33 OS=Mus musculus OX=10090 GN=Wdr33 PE=1 SV=1	33.73	0.218712	0
Q9CXJ4	ATP-binding cassette sub-family B member 8, mitochondrial OS=Mus musculus OX=10090 GN=Abcb8 PE=1 SV=1	31.47	0.22091	0
Q9D824	Pre-mRNA 3'-end-processing factor FIP1 OS=Mus musculus OX=10090 GN=Fip1l1 PE=1 SV=1	61.28	0.236928	0
D7PDD4	Megakaryocyte and platelet inhibitory receptor G6b OS=Mus musculus OX=10090 GN=Mpig6b PE=1 SV=1	15.59	0.244143	0.03
Q3V0B4	Cilia- and flagella-associated protein 65 OS=Mus musculus OX=10090 GN=Cfap65 PE=1 SV=1	46.43	0.246597	0.02
Q3UZ18	Little elongation complex subunit 2 OS=Mus musculus OX=10090 GN=Ice2 PE=1 SV=2	62.94	0.249075	0.08
Q3UFQ8	Capping protein, Arp2/3 and myosin-I linker protein 3 OS=Mus musculus OX=10090 GN=Carmil3 PE=1 SV=2	100.97	0.254107	0.02
Q6VGS5	Protein Daple OS=Mus musculus OX=10090 GN=Ccdc88c PE=1 SV=1	82.65	0.267135	0
P13439	Uridine 5'-monophosphate synthase OS=Mus musculus OX=10090 GN=Umps PE=1 SV=3	98.96	0.26982	0
A0JP43	EF-hand calcium-binding domain-containing protein 5 OS=Mus musculus OX=10090 GN=Efcab5 PE=1 SV=2	132.72	0.280832	0
P58389	Serine/threonine-protein phosphatase 2A activator OS=Mus musculus OX=10090 GN=Ptpa PE=1 SV=1	24.17	0.283654	0.01
Q9JJA7	Cyclin-L2 OS=Mus musculus OX=10090 GN=Ccnl2 PE=1 SV=1	64.77	0.286505	0
Q65Z40	Wings apart-like protein homolog OS=Mus musculus OX=10090 GN=Wapl PE=1 SV=2	93.96	0.286505	0.03
Q3USH5	Splicing factor, suppressor of white-apricot homolog OS=Mus musculus OX=10090 GN=Sfswap PE=1 SV=2	18.44	0.289384	0
E9PY46	Intraflagellar transport protein 140 homolog OS=Mus musculus OX=10090 GN=Ift140 PE=1 SV=1	60.44	0.298197	0
Q8BI84	Transport and Golgi organization protein 1 homolog OS=Mus musculus OX=10090 GN=Mia3 PE=1 SV=2	79.39	0.304221	0
Q3UJV1	Coiled-coil domain-containing protein 61 OS=Mus musculus OX=10090 GN=Ccdc61 PE=1 SV=1	62.76	0.310367	0.05
Q8VCE9	Pleckstrin homology domain-containing family H member 3 OS=Mus musculus OX=10090 GN=Plekhh3 PE=2 SV=1	41.21	0.319819	0.01
Q402B2	WD repeat-containing protein 93 OS=Mus musculus OX=10090 GN=Wdr93 PE=2 SV=1	26.84	0.323033	0.03
Q9DC22	DDB1- and CUL4-associated factor 6 OS=Mus musculus OX=10090 GN=Dcaf6 PE=1 SV=1	43.22	0.32628	0
P0DM40	Fer-1-like protein 5 OS=Mus musculus OX=10090 GN=Fer1l5 PE=1 SV=1	64.41	0.329559	0
Q80VW7	AT-hook-containing transcription factor OS=Mus musculus OX=10090 GN=Akna PE=1 SV=1	120.31	0.329559	0.01
Q9CQ76	Nephrocan OS=Mus musculus OX=10090 GN=Nepn PE=1 SV=1	62.73	0.339596	0
Q8C7R4	Ubiquitin-like modifier-activating enzyme 6 OS=Mus musculus OX=10090 GN=Uba6 PE=1 SV=1	70.72	0.346456	0.02
Q9D9T8	EF-hand domain-containing protein 1 OS=Mus musculus OX=10090 GN=Efhc1 PE=1 SV=1	41.5	0.357007	0
P35761	Dual specificity protein kinase TTK OS=Mus musculus OX=10090 GN=Ttk PE=1 SV=1	55.54	0.360595	0.04
Q69ZT1	Fanconi-associated nuclease 1 OS=Mus musculus OX=10090 GN=Fan1 PE=2 SV=2	58.77	0.367879	0
O55123	Stromelysin-2 OS=Mus musculus OX=10090 GN=Mmp10 PE=2 SV=1	74.49	0.367879	0
Q9D3S3	Sorting nexin-29 OS=Mus musculus OX=10090 GN=Snx29 PE=1 SV=2	90.72	0.375311	0
Q8VC12	Urocanate hydratase OS=Mus musculus OX=10090 GN=Uroc1 PE=1 SV=2	17.94	0.379083	0.03
P35436	Glutamate receptor ionotropic, NMDA 2A OS=Mus musculus OX=10090 GN=Grin2a PE=1 SV=2	47.15	0.382893	0.06
Q68SN8	Fc receptor-like protein 5 OS=Mus musculus OX=10090 GN=Fcrl5 PE=1 SV=3	36.2	0.386741	0.01
Q61313	Transcription factor AP-2-beta OS=Mus musculus OX=10090 GN=Tfap2b PE=1 SV=2	265.96	0.394554	0.06
O89032	SH3 and PX domain-containing protein 2A OS=Mus musculus OX=10090 GN=Sh3pxd2a PE=1 SV=2	63.67	0.394554	0.02
O88444	Adenylate cyclase type 1 OS=Mus musculus OX=10090 GN=Adcy1 PE=1 SV=2	29.94	0.402524	0.02
Q6URW6	Myosin-14 OS=Mus musculus OX=10090 GN=Myh14 PE=1 SV=1	36.99	0.40657	0.02
Q69ZX6	MORC family CW-type zinc finger protein 2A OS=Mus musculus OX=10090 GN=Morc2a PE=1 SV=2	36.84	0.40657	0.02
Q91YR5	Methyltransferase-like protein 13 OS=Mus musculus OX=10090 GN=Mettl13 PE=1 SV=1	70.63	0.40657	0.06
P21784	V(D)J recombination-activating protein 2 OS=Mus musculus OX=10090 GN=Rag2 PE=1 SV=2	12.72	0.414783	0.02
Q68FF0	Uncharacterized protein KIAA1841 OS=Mus musculus OX=10090 GN=Kiaa1841 PE=1 SV=2	184.57	0.414783	0.02
O88573	AF4/FMR2 family member 1 OS=Mus musculus OX=10090 GN=Aff1 PE=1 SV=2	98.58	0.418952	0.03
P97484	Leukocyte immunoglobulin-like receptor subfamily B member 3 OS=Mus musculus OX=10090 GN=Lilrb3 PE=1 SV=1	79.83	0.427415	0.09
Q1HKZ5	Mitogen-activated protein kinase kinase kinase 13 OS=Mus musculus OX=10090 GN=Map3k13 PE=1 SV=1	96.18	0.427415	0.04
Q80TH2	Erbin OS=Mus musculus OX=10090 GN=Erbin PE=1 SV=3	41.69	0.431711	0.06
Q03391	Glutamate receptor ionotropic, NMDA 2D OS=Mus musculus OX=10090 GN=Grin2d PE=1 SV=3	79.79	0.436049	0.03
A2RSJ4	UHRF1-binding protein 1-like OS=Mus musculus OX=10090 GN=Uhrf1bp1l PE=1 SV=2	73.99	0.440432	0.09
Q6PGG2	GEM-interacting protein OS=Mus musculus OX=10090 GN=Gmip PE=1 SV=1	20.89	0.444858	0.01
Q8CHB8	Tubulin polyglutamylase TTLL5 OS=Mus musculus OX=10090 GN=Ttll5 PE=2 SV=3	44.92	0.444858	0.01
Q6ZPR6	Inhibitor of Bruton tyrosine kinase OS=Mus musculus OX=10090 GN=Ibtk PE=1 SV=3	52.85	0.453845	0.1
Q8BLR5	PH and SEC7 domain-containing protein 4 OS=Mus musculus OX=10090 GN=Psd4 PE=1 SV=1	69.96	0.453845	0.07
Q8BRC6	Cilia- and flagella-associated protein 91 OS=Mus musculus OX=10090 GN=Maats1 PE=1 SV=3	58.96	0.463013	0.06
Q9QUQ5	Short transient receptor potential channel 4 OS=Mus musculus OX=10090 GN=Trpc4 PE=1 SV=1	4.32	0.463013	0.21
Q9R1B9	Slit homolog 2 protein OS=Mus musculus OX=10090 GN=Slit2 PE=2 SV=2	93.96	0.467666	0.19
Q61739	Integrin alpha-6 OS=Mus musculus OX=10090 GN=Itga6 PE=1 SV=3	56.04	0.467666	0.01
Q9JIM3	DNA excision repair protein ERCC-6-like 2 OS=Mus musculus OX=10090 GN=Ercc6l2 PE=1 SV=3	126.09	0.477114	0
P97868	E3 ubiquitin-protein ligase RBBP6 OS=Mus musculus OX=10090 GN=Rbbp6 PE=1 SV=5	123.07	0.477114	0
Q64521	Glycerol-3-phosphate dehydrogenase, mitochondrial OS=Mus musculus OX=10090 GN=Gpd2 PE=1 SV=2	34.65	0.481909	0.01
O35595	Protein patched homolog 2 OS=Mus musculus OX=10090 GN=Ptch2 PE=2 SV=2	47.13	0.481909	0.15
C0LLJ0	Importin subunit alpha-8 OS=Mus musculus OX=10090 GN=Kpna7 PE=1 SV=1	156.9	0.486752	0
Q9Z1N9	Protein unc-13 homolog B OS=Mus musculus OX=10090 GN=Unc13b PE=1 SV=2	78.66	0.491644	0.02
Q8VDR9	Dedicator of cytokinesis protein 6 OS=Mus musculus OX=10090 GN=Dock6 PE=1 SV=4	57.98	0.491644	0.03
Q91WJ8	Far upstream element-binding protein 1 OS=Mus musculus OX=10090 GN=Fubp1 PE=1 SV=1	148.29	0.491644	0.24
Q6V3W6	Dynein regulatory complex subunit 7 OS=Mus musculus OX=10090 GN=Drc7 PE=1 SV=4	45.09	0.496585	0.03
Q80TI1	Pleckstrin homology domain-containing family H member 1 OS=Mus musculus OX=10090 GN=Plekhh1 PE=1 SV=2	22.44	0.496585	0.04
D3Z3C6	AN1-type zinc finger protein 4 OS=Mus musculus OX=10090 GN=Zfand4 PE=4 SV=2	34.17	0.496585	0.04
Q62252	Sperm surface protein Sp17 OS=Mus musculus OX=10090 GN=Spa17 PE=1 SV=1	10.47	0.496585	0.09
P31750	RAC-alpha serine/threonine-protein kinase OS=Mus musculus OX=10090 GN=Akt1 PE=1 SV=2	53.76	0.501576	0.03
Q80X44	Zinc finger and BTB domain-containing protein 24 OS=Mus musculus OX=10090 GN=Zbtb24 PE=1 SV=1	57.39	0.501576	0.02
Q8BL66	Early endosome antigen 1 OS=Mus musculus OX=10090 GN=Eea1 PE=1 SV=2	34.06	0.501576	0.01
Q5QNQ9	Collagen alpha-1(XXVII) chain OS=Mus musculus OX=10090 GN=Col27a1 PE=2 SV=1	35.08	0.501576	0.03
Q6NV83	U2 snRNP-associated SURP motif-containing protein OS=Mus musculus OX=10090 GN=U2surp PE=1 SV=3	53.74	0.511709	0
Q810U4	Neuronal cell adhesion molecule OS=Mus musculus OX=10090 GN=Nrcam PE=1 SV=2	93.88	0.516851	0.16
Q80U28	MAP kinase-activating death domain protein OS=Mus musculus OX=10090 GN=Madd PE=1 SV=2	130.1	0.516851	0
Q76MZ3	Serine/threonine-protein phosphatase 2A 65 kDa regulatory subunit A alpha isoform OS=Mus musculus OX=10090 GN=Ppp2r1a PE=1 SV=3	106.4	0.516851	0.15
Q9WTX7	Four and a half LIM domains protein 5 OS=Mus musculus OX=10090 GN=Fhl5 PE=1 SV=1	33.62	0.516851	0.08
P53762	Aryl hydrocarbon receptor nuclear translocator OS=Mus musculus OX=10090 GN=Arnt PE=1 SV=3	16.58	0.522046	0.16
Q05D44	Eukaryotic translation initiation factor 5B OS=Mus musculus OX=10090 GN=Eif5b PE=1 SV=2	20.03	0.527292	0
Q61475	Complement decay-accelerating factor, GPI-anchored OS=Mus musculus OX=10090 GN=Cd55 PE=1 SV=2	35.57	0.537944	0.03
Q8JZQ2	AFG3-like protein 2 OS=Mus musculus OX=10090 GN=Afg3l2 PE=1 SV=1	205.71	0.537944	0.01
Q6ZPT1	Kelch-like protein 9 OS=Mus musculus OX=10090 GN=Klhl9 PE=2 SV=2	15.22	0.537944	0.07
Q8C052	Microtubule-associated protein 1S OS=Mus musculus OX=10090 GN=Map1s PE=1 SV=2	146.1	0.537944	0.02
Q9D4I2	Meiosis inhibitor protein 1 OS=Mus musculus OX=10090 GN=Mei1 PE=2 SV=4	19.27	0.537944	0.1
Q6P4T1	Sorting nexin-19 OS=Mus musculus OX=10090 GN=Snx19 PE=1 SV=1	36.53	0.537944	0.14
Q00PI9	Heterogeneous nuclear ribonucleoprotein U-like protein 2 OS=Mus musculus OX=10090 GN=Hnrnpul2 PE=1 SV=2	55.43	0.543351	0.08
B2RX14	Terminal uridylyltransferase 4 OS=Mus musculus OX=10090 GN=Zcchc11 PE=1 SV=2	30.72	0.543351	0.15
Q62205	Sodium channel protein type 9 subunit alpha OS=Mus musculus OX=10090 GN=Scn9a PE=1 SV=2	61.25	0.548812	0.04
Q924C1	Exportin-5 OS=Mus musculus OX=10090 GN=Xpo5 PE=1 SV=1	33.73	0.554327	0.07
Q80Y86	Mitogen-activated protein kinase 15 OS=Mus musculus OX=10090 GN=Mapk15 PE=1 SV=1	54.97	0.554327	0.03
Q8BG95	Protein phosphatase 1 regulatory subunit 12B OS=Mus musculus OX=10090 GN=Ppp1r12b PE=1 SV=2	54.83	0.565525	0.23
Q9QXN3	Activating signal cointegrator 1 OS=Mus musculus OX=10090 GN=Trip4 PE=1 SV=2	72.42	0.565525	0.01
Q01815	Voltage-dependent L-type calcium channel subunit alpha-1C OS=Mus musculus OX=10090 GN=Cacna1c PE=1 SV=1	36.7	0.565525	0.05
Q8CIS0	Caspase recruitment domain-containing protein 11 OS=Mus musculus OX=10090 GN=Card11 PE=1 SV=2	74.26	0.571209	0.19
A6H5Z3	Exocyst complex component 6B OS=Mus musculus OX=10090 GN=Exoc6b PE=1 SV=1	98.15	0.57695	0.15
P97500	Myelin transcription factor 1-like protein OS=Mus musculus OX=10090 GN=Myt1l PE=1 SV=3	77.99	0.582748	0.01
Q9QX29	Short transient receptor potential channel 5 OS=Mus musculus OX=10090 GN=Trpc5 PE=1 SV=2	101.49	0.582748	0
P47810	Wee1-like protein kinase OS=Mus musculus OX=10090 GN=Wee1 PE=1 SV=2	16.19	0.582748	0.24
Q6P5U7	NACHT and WD repeat domain-containing protein 2 OS=Mus musculus OX=10090 GN=Nwd2 PE=1 SV=2	46.12	0.582748	0.11
G3X9K3	Brefeldin A-inhibited guanine nucleotide-exchange protein 1 OS=Mus musculus OX=10090 GN=Arfgef1 PE=1 SV=1	46.68	0.588605	0
Q8VHJ5	Serine/threonine-protein kinase MARK1 OS=Mus musculus OX=10090 GN=Mark1 PE=1 SV=2	25.75	0.588605	0.05
Q8VDU5	SNF-related serine/threonine-protein kinase OS=Mus musculus OX=10090 GN=Snrk PE=1 SV=1	98.68	0.588605	0.02
Q8BJS7	Microtubule-associated protein 10 OS=Mus musculus OX=10090 GN=Map10 PE=1 SV=1	62.11	0.588605	0.09
Q05909	Receptor-type tyrosine-protein phosphatase gamma OS=Mus musculus OX=10090 GN=Ptprg PE=1 SV=1	49.67	0.594521	0.03
Q5SWW4	Mediator of RNA polymerase II transcription subunit 13 OS=Mus musculus OX=10090 GN=Med13 PE=1 SV=1	64.99	0.594521	0
Q61097	Kinase suppressor of Ras 1 OS=Mus musculus OX=10090 GN=Ksr1 PE=1 SV=1	89.79	0.594521	0.04
Q6PFD6	Kinesin-like protein KIF18B OS=Mus musculus OX=10090 GN=Kif18b PE=2 SV=2	55.62	0.594521	0.1
P62259	14-3-3 protein epsilon OS=Mus musculus OX=10090 GN=Ywhae PE=1 SV=1	27.77	0.594521	0.08
Q8K243	E3 ubiquitin-protein ligase TRIM68 OS=Mus musculus OX=10090 GN=Trim68 PE=2 SV=1	20.94	0.594521	0.02
Q8BGI4	Protein FAM13A OS=Mus musculus OX=10090 GN=Fam13a PE=1 SV=1	100.08	0.600496	0.27
A2A791	Zinc finger MYM-type protein 4 OS=Mus musculus OX=10090 GN=Zmym4 PE=1 SV=1	139.89	0.600496	0.17
Q80W35	Transmembrane protein 202 OS=Mus musculus OX=10090 GN=Tmem202 PE=2 SV=1	30.07	0.600496	0.18
P47750	Thyrotropin receptor OS=Mus musculus OX=10090 GN=Tshr PE=1 SV=2	23.39	0.600496	0.1
Q9ERG0	LIM domain and actin-binding protein 1 OS=Mus musculus OX=10090 GN=Lima1 PE=1 SV=3	74.44	0.600496	0
B2RXC5	Zinc finger protein 382 OS=Mus musculus OX=10090 GN=Znf382 PE=1 SV=1	40.38	0.606531	0.31
Q0P678	Zinc finger CCCH domain-containing protein 18 OS=Mus musculus OX=10090 GN=Zc3h18 PE=1 SV=1	136.17	0.606531	0.02
A2AHC3	Calmodulin-regulated spectrin-associated protein 1 OS=Mus musculus OX=10090 GN=Camsap1 PE=1 SV=1	83.61	0.612626	0.08
Q05860	Formin-1 OS=Mus musculus OX=10090 GN=Fmn1 PE=1 SV=2	101.63	0.612626	0.09
O35216	Histone H3-like centromeric protein A OS=Mus musculus OX=10090 GN=Cenpa PE=2 SV=1	323.93	0.612626	0.22
E9Q5G3	Kinesin-like protein KIF23 OS=Mus musculus OX=10090 GN=Kif23 PE=1 SV=1	15.87	0.612626	0.09
Q7TSJ2	Microtubule-associated protein 6 OS=Mus musculus OX=10090 GN=Map6 PE=1 SV=2	59.43	0.612626	0.31
P21271	Unconventional myosin-Vb OS=Mus musculus OX=10090 GN=Myo5b PE=1 SV=2	30.17	0.618783	0
Q6Q477	Plasma membrane calcium-transporting ATPase 4 OS=Mus musculus OX=10090 GN=Atp2b4 PE=1 SV=1	140.7	0.618783	0.08
Q8C9B9	Death-inducer obliterator 1 OS=Mus musculus OX=10090 GN=Dido1 PE=1 SV=4	37.79	0.618783	0
A2AHJ4	Bromodomain and WD repeat-containing protein 3 OS=Mus musculus OX=10090 GN=Brwd3 PE=1 SV=1	70.29	0.625002	0
Q6P9P0	SMC5-SMC6 complex localization factor protein 2 OS=Mus musculus OX=10090 GN=Slf2 PE=2 SV=2	19.64	0.625002	0.13
Q9Z180	SET-binding protein OS=Mus musculus OX=10090 GN=Setbp1 PE=1 SV=4	45.57	0.631284	0.17
Q6RHR9	Membrane-associated guanylate kinase, WW and PDZ domain-containing protein 1 OS=Mus musculus OX=10090 GN=Magi1 PE=1 SV=1	170.95	0.631284	0.07
Q8BUZ3	Tigger transposable element-derived protein 4 OS=Mus musculus OX=10090 GN=Tigd4 PE=2 SV=1	44.36	0.631284	0.36
Q6PGC1	ATP-dependent RNA helicase DHX29 OS=Mus musculus OX=10090 GN=Dhx29 PE=1 SV=1	88.05	0.637628	0.02
A2AQP0	Myosin-7B OS=Mus musculus OX=10090 GN=Myh7b PE=3 SV=1	94.97	0.644036	0.03
P46467	Vacuolar protein sorting-associated protein 4B OS=Mus musculus OX=10090 GN=Vps4b PE=1 SV=2	34.01	0.644036	0.07
Q8R5G7	Arf-GAP with Rho-GAP domain, ANK repeat and PH domain-containing protein 3 OS=Mus musculus OX=10090 GN=Arap3 PE=1 SV=3	9.4	0.644036	0.11
Q3TJ91	Lethal(2) giant larvae protein homolog 2 OS=Mus musculus OX=10090 GN=Llgl2 PE=1 SV=2	32.18	0.650509	0.15
P70388	DNA repair protein RAD50 OS=Mus musculus OX=10090 GN=Rad50 PE=1 SV=1	45.5	0.657047	0.36
Q7TPB0	Phospholipid phosphatase-related protein type 3 OS=Mus musculus OX=10090 GN=Plppr3 PE=1 SV=1	34.43	0.657047	0.39
Q62095	ATP-dependent RNA helicase DDX3Y OS=Mus musculus OX=10090 GN=Ddx3y PE=1 SV=2	179.83	0.66365	0.09
Q9D952	Envoplakin OS=Mus musculus OX=10090 GN=Evpl PE=1 SV=3	48.86	0.66365	0
Q61292	Laminin subunit beta-2 OS=Mus musculus OX=10090 GN=Lamb2 PE=1 SV=2	49.72	0.66365	0.1
Q6NS57	Mitogen-activated protein kinase-binding protein 1 OS=Mus musculus OX=10090 GN=Mapkbp1 PE=1 SV=1	61.57	0.66365	0.08
Q3U2E2	Zinc finger MYM-type protein 5 OS=Mus musculus OX=10090 GN=Zmym5 PE=2 SV=2	38.41	0.66365	0.34
Q5DTT2	PH and SEC7 domain-containing protein 1 OS=Mus musculus OX=10090 GN=Psd PE=1 SV=2	101.87	0.66365	0.15
Q497V5	S1 RNA-binding domain-containing protein 1 OS=Mus musculus OX=10090 GN=Srbd1 PE=2 SV=2	73.93	0.66365	0.13
E1U8D0	Protein SOGA1 OS=Mus musculus OX=10090 GN=Soga1 PE=1 SV=3	120.89	0.66365	0.01
B1AUH1	Receptor-type tyrosine-protein phosphatase U OS=Mus musculus OX=10090 GN=Ptpru PE=1 SV=1	44.11	0.67032	0.2
Q8CGB6	Tensin-2 OS=Mus musculus OX=10090 GN=Tns2 PE=1 SV=1	48.11	0.67032	0.13
Q811J3	Iron-responsive element-binding protein 2 OS=Mus musculus OX=10090 GN=Ireb2 PE=1 SV=2	79.91	0.677057	0.12
Q99K74	Mediator of RNA polymerase II transcription subunit 24 OS=Mus musculus OX=10090 GN=Med24 PE=1 SV=1	41.12	0.677057	0.18
Q8C079	Striatin-interacting protein 1 OS=Mus musculus OX=10090 GN=Strip1 PE=1 SV=2	51.39	0.677057	0.12
Q9R053	Sodium channel protein type 11 subunit alpha OS=Mus musculus OX=10090 GN=Scn11a PE=2 SV=2	92.72	0.683861	0.04
Q9CZ91	Serum response factor-binding protein 1 OS=Mus musculus OX=10090 GN=Srfbp1 PE=1 SV=1	64.02	0.683861	0.19
P53668	LIM domain kinase 1 OS=Mus musculus OX=10090 GN=Limk1 PE=1 SV=1	36.84	0.683861	0.35
Q6ZPE2	Myotubularin-related protein 5 OS=Mus musculus OX=10090 GN=Sbf1 PE=1 SV=2	109.78	0.683861	0.09
Q5QNQ6	Oxysterol-binding protein 2 OS=Mus musculus OX=10090 GN=Osbp2 PE=1 SV=1	51.37	0.683861	0.26
A2AKG8	Focadhesin OS=Mus musculus OX=10090 GN=Focad PE=1 SV=1	84.54	0.683861	0.14
Q64487	Receptor-type tyrosine-protein phosphatase delta OS=Mus musculus OX=10090 GN=Ptprd PE=1 SV=3	60.36	0.683861	0.11
Q9QY40	Plexin-B3 OS=Mus musculus OX=10090 GN=Plxnb3 PE=1 SV=2	47.13	0.690734	0.1
Q9CW79	Golgin subfamily A member 1 OS=Mus musculus OX=10090 GN=Golga1 PE=1 SV=2	61.3	0.690734	0.16
P70207	Plexin-A2 OS=Mus musculus OX=10090 GN=Plxna2 PE=1 SV=2	30.87	0.690734	0.09
Q6QI06	Rapamycin-insensitive companion of mTOR OS=Mus musculus OX=10090 GN=Rictor PE=1 SV=2	41.69	0.690734	0.05
P16056	Hepatocyte growth factor receptor OS=Mus musculus OX=10090 GN=Met PE=1 SV=1	40.43	0.697676	0
Q80TE0	RNA polymerase II-associated protein 1 OS=Mus musculus OX=10090 GN=Rpap1 PE=1 SV=2	43.32	0.697676	0.17
Q8R1A4	Dedicator of cytokinesis protein 7 OS=Mus musculus OX=10090 GN=Dock7 PE=1 SV=3	36.67	0.704688	0.06
Q80YW5	B box and SPRY domain-containing protein OS=Mus musculus OX=10090 GN=Bspry PE=1 SV=1	78	0.704688	0.31
Q6DID3	Protein SCAF8 OS=Mus musculus OX=10090 GN=Scaf8 PE=1 SV=1	47.3	0.704688	0.21
Q6P9K8	Caskin-1 OS=Mus musculus OX=10090 GN=Caskin1 PE=1 SV=2	73.79	0.704688	0.31
Q6A009	E3 ubiquitin-protein ligase listerin OS=Mus musculus OX=10090 GN=Ltn1 PE=1 SV=3	74.31	0.704688	0.14
Q68FF6	ARF GTPase-activating protein GIT1 OS=Mus musculus OX=10090 GN=Git1 PE=1 SV=1	53.82	0.704688	0.12
Q9QZC2	Plexin-C1 OS=Mus musculus OX=10090 GN=Plxnc1 PE=1 SV=1	75.71	0.71177	0.07
Q9JLN6	Disintegrin and metalloproteinase domain-containing protein 28 OS=Mus musculus OX=10090 GN=Adam28 PE=1 SV=3	72.01	0.71177	0.17
Q6NSW3	A-kinase anchor protein SPHKAP OS=Mus musculus OX=10090 GN=Sphkap PE=1 SV=2	123.32	0.71177	0.3
Q9CU65	Zinc finger MYM-type protein 2 OS=Mus musculus OX=10090 GN=Zmym2 PE=1 SV=3	44.55	0.71177	0.28
Q6ZQ88	Lysine-specific histone demethylase 1A OS=Mus musculus OX=10090 GN=Kdm1a PE=1 SV=2	36.21	0.71177	0.15
P39053	Dynamin-1 OS=Mus musculus OX=10090 GN=Dnm1 PE=1 SV=2	73.03	0.71177	0.23
Q7TPV2	E3 ubiquitin-protein ligase DZIP3 OS=Mus musculus OX=10090 GN=Dzip3 PE=1 SV=2	28.82	0.71177	0.21
P56677	Suppressor of tumorigenicity 14 protein homolog OS=Mus musculus OX=10090 GN=St14 PE=1 SV=2	54.37	0.718924	0.32
Q9D992	Membrane-anchored junction protein OS=Mus musculus OX=10090 GN=Majin PE=1 SV=2	12.01	0.718924	0.24
B1AQJ2	Ubiquitin carboxyl-terminal hydrolase 36 OS=Mus musculus OX=10090 GN=Usp36 PE=1 SV=1	30.36	0.718924	0.15
Q8BZ47	Zinc finger protein 609 OS=Mus musculus OX=10090 GN=Znf609 PE=1 SV=2	48.66	0.718924	0.21
Q64727	Vinculin OS=Mus musculus OX=10090 GN=Vcl PE=1 SV=4	54.65	0.718924	0.26
Q8K019	Bcl-2-associated transcription factor 1 OS=Mus musculus OX=10090 GN=Bclaf1 PE=1 SV=2	87.98	0.726149	0.13
Q6NS46	Protein RRP5 homolog OS=Mus musculus OX=10090 GN=Pdcd11 PE=1 SV=2	42.2	0.726149	0.04
Q6SP97	Enkurin OS=Mus musculus OX=10090 GN=Enkur PE=1 SV=1	66.27	0.726149	0.1
P52963	Band 4.1-like protein 4A OS=Mus musculus OX=10090 GN=Epb41l4a PE=2 SV=2	77.67	0.726149	0.3
P63038	60 kDa heat shock protein, mitochondrial OS=Mus musculus OX=10090 GN=Hspd1 PE=1 SV=1	73.94	0.726149	0.31
Q69ZP3	Probable hydrolase PNKD OS=Mus musculus OX=10090 GN=Pnkd PE=1 SV=2	46.43	0.726149	0.2
P98083	SHC-transforming protein 1 OS=Mus musculus OX=10090 GN=Shc1 PE=1 SV=3	16.51	0.733447	0.21
Q3TTY5	Keratin, type II cytoskeletal 2 epidermal OS=Mus musculus OX=10090 GN=Krt2 PE=1 SV=1	67.03	0.733447	0.3
P51432	1-phosphatidylinositol 4,5-bisphosphate phosphodiesterase beta-3 OS=Mus musculus OX=10090 GN=Plcb3 PE=1 SV=2	71.27	0.733447	0.01
Q61037	Tuberin OS=Mus musculus OX=10090 GN=Tsc2 PE=1 SV=1	36.43	0.733447	0.19
P70208	Plexin-A3 OS=Mus musculus OX=10090 GN=Plxna3 PE=1 SV=2	61.7	0.733447	0.01
Q8BWQ4	Cap-specific mRNA (nucleoside-2'-O-)-methyltransferase 2 OS=Mus musculus OX=10090 GN=Cmtr2 PE=2 SV=1	71.86	0.733447	0.07
Q3URK3	Methylcytosine dioxygenase TET1 OS=Mus musculus OX=10090 GN=Tet1 PE=1 SV=2	56.29	0.740818	0.27
Q8CCB4	Vacuolar protein sorting-associated protein 53 homolog OS=Mus musculus OX=10090 GN=Vps53 PE=1 SV=1	131.73	0.740818	0.13
Q60902	Epidermal growth factor receptor substrate 15-like 1 OS=Mus musculus OX=10090 GN=Eps15l1 PE=1 SV=3	1.84	0.740818	0.24
E9Q0C6	Acrosomal protein KIAA1210 OS=Mus musculus OX=10090 GN=Kiaa1210 PE=1 SV=1	58.46	0.740818	0.16
Q925T6	Glutamate receptor-interacting protein 1 OS=Mus musculus OX=10090 GN=Grip1 PE=1 SV=1	18.12	0.748264	0.05
Q9CWU0	Putative ATP-dependent RNA helicase TDRD12 OS=Mus musculus OX=10090 GN=Tdrd12 PE=1 SV=2	21.04	0.748264	0.15
Q3UMB9	WASH complex subunit 4 OS=Mus musculus OX=10090 GN=Washc4 PE=1 SV=2	10.86	0.748264	0.29
Q8K337	Type II inositol 1,4,5-trisphosphate 5-phosphatase OS=Mus musculus OX=10090 GN=Inpp5b PE=1 SV=1	70.67	0.748264	0.08
O88466	Zinc finger protein 106 OS=Mus musculus OX=10090 GN=Znf106 PE=1 SV=3	107.92	0.748264	0.07
Q62172	RalA-binding protein 1 OS=Mus musculus OX=10090 GN=Ralbp1 PE=1 SV=4	117.16	0.755784	0.09
E0CYV9	Uncharacterized protein C4orf54 homolog OS=Mus musculus OX=10090 PE=1 SV=1	91.16	0.755784	0.12
C8YR32	Lipoxygenase homology domain-containing protein 1 OS=Mus musculus OX=10090 GN=Loxhd1 PE=2 SV=1	155.25	0.755784	0
Q8C4A5	Putative Polycomb group protein ASXL3 OS=Mus musculus OX=10090 GN=Asxl3 PE=2 SV=3	91.77	0.755784	0.17
Q9CUU3	Synaptonemal complex protein 2 OS=Mus musculus OX=10090 GN=Sycp2 PE=1 SV=2	130.94	0.755784	0.04
Q3U3C9	Genetic suppressor element 1 OS=Mus musculus OX=10090 GN=Gse1 PE=1 SV=2	84.95	0.755784	0.25
A2A690	Protein TANC2 OS=Mus musculus OX=10090 GN=Tanc2 PE=1 SV=1	70.51	0.755784	0.06
Q8BHZ4	Zinc finger protein 592 OS=Mus musculus OX=10090 GN=Znf592 PE=1 SV=3	56.55	0.755784	0.12
Q9QWY8	Arf-GAP with SH3 domain, ANK repeat and PH domain-containing protein 1 OS=Mus musculus OX=10090 GN=Asap1 PE=1 SV=2	70.88	0.763379	0.23
Q80Y50	Calmodulin-binding transcription activator 2 OS=Mus musculus OX=10090 GN=Camta2 PE=2 SV=1	2.99	0.763379	0.32
Q6ZQH8	Nucleoporin NUP188 homolog OS=Mus musculus OX=10090 GN=Nup188 PE=1 SV=2	79.06	0.763379	0.13
Q61092	Laminin subunit gamma-2 OS=Mus musculus OX=10090 GN=Lamc2 PE=1 SV=2	62.89	0.763379	0.38
O35643	AP-1 complex subunit beta-1 OS=Mus musculus OX=10090 GN=Ap1b1 PE=1 SV=2	60.99	0.763379	0.22
Q91V24	ATP-binding cassette sub-family A member 7 OS=Mus musculus OX=10090 GN=Abca7 PE=1 SV=1	27.42	0.771052	0.26
A2CG63	AT-rich interactive domain-containing protein 4B OS=Mus musculus OX=10090 GN=Arid4b PE=1 SV=1	102.03	0.771052	0.24
P70335	Rho-associated protein kinase 1 OS=Mus musculus OX=10090 GN=Rock1 PE=1 SV=1	60.14	0.771052	0.15
P08775	DNA-directed RNA polymerase II subunit RPB1 OS=Mus musculus OX=10090 GN=Polr2a PE=1 SV=3	40.8	0.771052	0.12
Q9QZ04	MAGE-like protein 2 OS=Mus musculus OX=10090 GN=Magel2 PE=1 SV=2	94.36	0.778801	0.05
Q5SW75	Protein phosphatase Slingshot homolog 2 OS=Mus musculus OX=10090 GN=Ssh2 PE=1 SV=2	82.49	0.778801	0.07
Q9JL26	Formin-like protein 1 OS=Mus musculus OX=10090 GN=Fmnl1 PE=1 SV=1	166.51	0.778801	0.14
P15508	Spectrin beta chain, erythrocytic OS=Mus musculus OX=10090 GN=Sptb PE=1 SV=4	38.19	0.778801	0.19
Q8CJ40	Rootletin OS=Mus musculus OX=10090 GN=Crocc PE=1 SV=2	40.16	0.778801	0.13
Q64739	Collagen alpha-2(XI) chain OS=Mus musculus OX=10090 GN=Col11a2 PE=2 SV=3	49.56	0.778801	0.17
O88700	Bloom syndrome protein homolog OS=Mus musculus OX=10090 GN=Blm PE=1 SV=1	133.4	0.778801	0.19
Q8C8U0	Liprin-beta-1 OS=Mus musculus OX=10090 GN=Ppfibp1 PE=1 SV=3	32.34	0.778801	0.3
Q9R269	Periplakin OS=Mus musculus OX=10090 GN=Ppl PE=1 SV=1	96.58	0.778801	0.05
Q8BTV2	Cleavage and polyadenylation specificity factor subunit 7 OS=Mus musculus OX=10090 GN=Cpsf7 PE=1 SV=2	29.33	0.786628	0.32
Q9QZN1	F-box/LRR-repeat protein 17 OS=Mus musculus OX=10090 GN=Fbxl17 PE=2 SV=3	217.2	0.786628	0.31
Q8K010	5-oxoprolinase OS=Mus musculus OX=10090 GN=Oplah PE=1 SV=1	53.63	0.786628	0.3
Q99MV5	RNA helicase Mov10l1 OS=Mus musculus OX=10090 GN=Mov10l1 PE=1 SV=1	50.62	0.786628	0.37
Q8CHG3	GRIP and coiled-coil domain-containing protein 2 OS=Mus musculus OX=10090 GN=Gcc2 PE=1 SV=2	60.56	0.786628	0.17
E9Q286	Little elongation complex subunit 1 OS=Mus musculus OX=10090 GN=Ice1 PE=1 SV=1	51.23	0.786628	0.33
Q3ZT31	Sorting nexin-25 OS=Mus musculus OX=10090 GN=Snx25 PE=1 SV=3	37.51	0.786628	0.26
Q61879	Myosin-10 OS=Mus musculus OX=10090 GN=Myh10 PE=1 SV=2	44.56	0.794534	0.18
Q91WS2	NACHT, LRR and PYD domains-containing protein 6 OS=Mus musculus OX=10090 GN=Nlrp6 PE=1 SV=3	50.79	0.794534	0.21
Q4VBD2	Transmembrane anterior posterior transformation protein 1 OS=Mus musculus OX=10090 GN=Tapt1 PE=1 SV=2	54.16	0.802519	0.31
Q8BZ05	Arf-GAP with Rho-GAP domain, ANK repeat and PH domain-containing protein 2 OS=Mus musculus OX=10090 GN=Arap2 PE=1 SV=2	102.55	0.802519	0.17
P40645	Transcription factor SOX-6 OS=Mus musculus OX=10090 GN=Sox6 PE=1 SV=2	92.01	0.802519	0.29
Q8R420	ATP-binding cassette sub-family A member 3 OS=Mus musculus OX=10090 GN=Abca3 PE=1 SV=3	127.21	0.802519	0.26
A2AGT5	Cytoskeleton-associated protein 5 OS=Mus musculus OX=10090 GN=Ckap5 PE=1 SV=1	42.98	0.810584	0.13
A2AFS3	UPF0577 protein KIAA1324 OS=Mus musculus OX=10090 GN=Kiaa1324 PE=1 SV=1	106.44	0.810584	0.25
Q3UGF1	WD repeat-containing protein 19 OS=Mus musculus OX=10090 GN=Wdr19 PE=1 SV=1	64.84	0.810584	0.29
Q3UPI1	Protein FAM198B OS=Mus musculus OX=10090 GN=Fam198b PE=2 SV=1	108.72	0.818731	0.23
P04104	Keratin, type II cytoskeletal 1 OS=Mus musculus OX=10090 GN=Krt1 PE=1 SV=4	47.76	0.818731	0.44
Q9JJR6	Uncharacterized protein C11orf16 homolog OS=Mus musculus OX=10090 GN=D7h11orf16 PE=2 SV=2	127.77	0.818731	0.25
Q9CW03	Structural maintenance of chromosomes protein 3 OS=Mus musculus OX=10090 GN=Smc3 PE=1 SV=2	63.15	0.818731	0.21
Q6ZQF0	DNA topoisomerase 2-binding protein 1 OS=Mus musculus OX=10090 GN=Topbp1 PE=1 SV=2	41.14	0.818731	0.27
Q3UU35	Ovostatin homolog OS=Mus musculus OX=10090 GN=Ovos PE=2 SV=2	36.4	0.818731	0.28
Q8VDC1	FYVE and coiled-coil domain-containing protein 1 OS=Mus musculus OX=10090 GN=Fyco1 PE=1 SV=1	67.34	0.818731	0.18
Q7TPQ3	E3 ubiquitin-protein ligase SHPRH OS=Mus musculus OX=10090 GN=Shprh PE=1 SV=1	66.94	0.818731	0.34
Q6NS45	Coiled-coil domain-containing protein 66 OS=Mus musculus OX=10090 GN=Ccdc66 PE=1 SV=3	109.67	0.826959	0.4
Q8VI75	Importin-4 OS=Mus musculus OX=10090 GN=Ipo4 PE=1 SV=1	28.92	0.826959	0.3
Q6ZQ38	Cullin-associated NEDD8-dissociated protein 1 OS=Mus musculus OX=10090 GN=Cand1 PE=1 SV=2	42.1	0.826959	0.29
B2RXS4	Plexin-B2 OS=Mus musculus OX=10090 GN=Plxnb2 PE=1 SV=1	52.3	0.826959	0.23
A2A4P0	ATP-dependent RNA helicase DHX8 OS=Mus musculus OX=10090 GN=Dhx8 PE=2 SV=1	207.12	0.826959	0.28
Q5DW34	Histone-lysine N-methyltransferase EHMT1 OS=Mus musculus OX=10090 GN=Ehmt1 PE=1 SV=2	77.78	0.83527	0.27
Q5SQM0	Echinoderm microtubule-associated protein-like 6 OS=Mus musculus OX=10090 GN=Eml6 PE=2 SV=1	55.82	0.83527	0.21
Q8BMK4	Cytoskeleton-associated protein 4 OS=Mus musculus OX=10090 GN=Ckap4 PE=1 SV=2	71.15	0.83527	0.32
Q6VH22	Intraflagellar transport protein 172 homolog OS=Mus musculus OX=10090 GN=Ift172 PE=1 SV=1	82.85	0.83527	0.32
Q811P8	Rho GTPase-activating protein 32 OS=Mus musculus OX=10090 GN=Arhgap32 PE=1 SV=2	25.02	0.843665	0.44
Q8CFW1	Anoctamin-2 OS=Mus musculus OX=10090 GN=Ano2 PE=1 SV=2	52.12	0.843665	0.23
Q68FG3	Protein SPT2 homolog OS=Mus musculus OX=10090 GN=Spty2d1 PE=2 SV=1	45.28	0.843665	0.28
Q62315	Protein Jumonji OS=Mus musculus OX=10090 GN=Jarid2 PE=1 SV=1	119.28	0.843665	0.29
Q64331	Unconventional myosin-VI OS=Mus musculus OX=10090 GN=Myo6 PE=1 SV=1	57.35	0.852144	0.24
Q56A08	G-patch domain and KOW motifs-containing protein OS=Mus musculus OX=10090 GN=Gpkow PE=1 SV=2	64.02	0.852144	0.26
Q922J3	CAP-Gly domain-containing linker protein 1 OS=Mus musculus OX=10090 GN=Clip1 PE=1 SV=1	180.25	0.852144	0.27
Q8CFW7	Coiled-coil and C2 domain-containing protein 2A OS=Mus musculus OX=10090 GN=Cc2d2a PE=1 SV=1	34.18	0.852144	0.25
P97927	Laminin subunit alpha-4 OS=Mus musculus OX=10090 GN=Lama4 PE=1 SV=2	75.74	0.852144	0.22
P20664	DNA primase small subunit OS=Mus musculus OX=10090 GN=Prim1 PE=1 SV=1	132.32	0.860708	0.35
E9Q9R9	Disks large homolog 5 OS=Mus musculus OX=10090 GN=Dlg5 PE=1 SV=1	88.56	0.860708	0.28
P60330	Separin OS=Mus musculus OX=10090 GN=Espl1 PE=1 SV=1	61.54	0.860708	0.33
P13864	DNA (cytosine-5)-methyltransferase 1 OS=Mus musculus OX=10090 GN=Dnmt1 PE=1 SV=5	62.36	0.860708	0.29
E9PZM4	Chromodomain-helicase-DNA-binding protein 2 OS=Mus musculus OX=10090 GN=Chd2 PE=1 SV=1	103.5	0.869358	0.25
Q5SUS0	F-box/WD repeat-containing protein 10 OS=Mus musculus OX=10090 GN=Fbxw10 PE=2 SV=1	94.68	0.869358	0.27
O70481	E3 ubiquitin-protein ligase UBR1 OS=Mus musculus OX=10090 GN=Ubr1 PE=1 SV=2	21.68	0.869358	0.29
Q69ZR9	Protein TASOR OS=Mus musculus OX=10090 GN=Fam208a PE=1 SV=2	49.37	0.869358	0.3
Q3UGY8	Brefeldin A-inhibited guanine nucleotide-exchange protein 3 OS=Mus musculus OX=10090 GN=Arfgef3 PE=1 SV=1	73.62	0.869358	0.39
Q9R1A3	Netrin-3 OS=Mus musculus OX=10090 GN=Ntn3 PE=2 SV=1	32.48	0.869358	0.41
Q9EPX2	Papilin OS=Mus musculus OX=10090 GN=Papln PE=2 SV=2	55.7	0.869358	0.34
Q91VN0	Low-density lipoprotein receptor-related protein 5 OS=Mus musculus OX=10090 GN=Lrp5 PE=1 SV=3	23.08	0.869358	0.34
A2AIV2	Protein virilizer homolog OS=Mus musculus OX=10090 GN=Virma PE=1 SV=1	51.3	0.878095	0.32
Q6P3Y5	Zinc finger protein 280C OS=Mus musculus OX=10090 GN=Znf280c PE=1 SV=1	85.1	0.878095	0.21
Q1ERP8	CMRF35-like molecule 9 OS=Mus musculus OX=10090 GN=Cd300lg PE=1 SV=1	114.77	0.878095	0.29
Q8BGC0	HIV Tat-specific factor 1 homolog OS=Mus musculus OX=10090 GN=Htatsf1 PE=1 SV=1	115.51	0.878095	0.36
Q9CWW7	CXXC-type zinc finger protein 1 OS=Mus musculus OX=10090 GN=Cxxc1 PE=2 SV=1	87.89	0.878095	0.33
P09922	Interferon-induced GTP-binding protein Mx1 OS=Mus musculus OX=10090 GN=Mx1 PE=1 SV=1	8.07	0.878095	0.46
A2AQ25	Sickle tail protein OS=Mus musculus OX=10090 GN=Skt PE=1 SV=1	39.63	0.878095	0.2
Q80UG2	Plexin-A4 OS=Mus musculus OX=10090 GN=Plxna4 PE=1 SV=3	118.78	0.878095	0.28
Q8CGC7	Bifunctional glutamate/proline--tRNA ligase OS=Mus musculus OX=10090 GN=Eprs PE=1 SV=4	127.92	0.878095	0.26
Q5SNZ0	Girdin OS=Mus musculus OX=10090 GN=Ccdc88a PE=1 SV=2	139.63	0.878095	0.26
O88509	DNA (cytosine-5)-methyltransferase 3B OS=Mus musculus OX=10090 GN=Dnmt3b PE=1 SV=2	60.44	0.878095	0.38
A2AUM9	Centrosomal protein of 152 kDa OS=Mus musculus OX=10090 GN=Cep152 PE=1 SV=1	90.63	0.88692	0.28
Q99246	Voltage-dependent L-type calcium channel subunit alpha-1D OS=Mus musculus OX=10090 GN=Cacna1d PE=1 SV=3	61.7	0.88692	0.31
P70206	Plexin-A1 OS=Mus musculus OX=10090 GN=Plxna1 PE=1 SV=1	70.26	0.88692	0.35
P59808	SAM and SH3 domain-containing protein 1 OS=Mus musculus OX=10090 GN=Sash1 PE=1 SV=1	36.43	0.88692	0.34
Q8BYA0	Tubulin-specific chaperone D OS=Mus musculus OX=10090 GN=Tbcd PE=1 SV=1	48.98	0.88692	0.44
Q02384	Son of sevenless homolog 2 OS=Mus musculus OX=10090 GN=Sos2 PE=1 SV=2	126.84	0.88692	0.29
Q0P5X1	Leucine-rich repeat and IQ domain-containing protein 1 OS=Mus musculus OX=10090 GN=Lrriq1 PE=2 SV=2	52.63	0.88692	0.4
Q6NZJ6	Eukaryotic translation initiation factor 4 gamma 1 OS=Mus musculus OX=10090 GN=Eif4g1 PE=1 SV=1	39.18	0.88692	0.37
O08648	Mitogen-activated protein kinase kinase kinase 4 OS=Mus musculus OX=10090 GN=Map3k4 PE=1 SV=2	71.8	0.895834	0.39
O08638	Myosin-11 OS=Mus musculus OX=10090 GN=Myh11 PE=1 SV=1	47.55	0.895834	0.26
Q3U108	AT-rich interactive domain-containing protein 5A OS=Mus musculus OX=10090 GN=Arid5a PE=1 SV=1	169.84	0.895834	0.31
Q8BYZ7	Engulfment and cell motility protein 3 OS=Mus musculus OX=10090 GN=Elmo3 PE=1 SV=2	23.48	0.895834	0.3
A2AJ15	Endoplasmic reticulum mannosyl-oligosaccharide 1,2-alpha-mannosidase OS=Mus musculus OX=10090 GN=Man1b1 PE=1 SV=1	11.7	0.904837	0.33
D3YYU8	Obscurin-like protein 1 OS=Mus musculus OX=10090 GN=Obsl1 PE=1 SV=1	52.05	0.904837	0.35
Q8BQM8	Echinoderm microtubule-associated protein-like 5 OS=Mus musculus OX=10090 GN=Eml5 PE=2 SV=2	53.81	0.904837	0.34
Q9JIB3	Baculoviral IAP repeat-containing protein 1g OS=Mus musculus OX=10090 GN=Naip7 PE=4 SV=1	43.34	0.904837	0.29
P33609	DNA polymerase alpha catalytic subunit OS=Mus musculus OX=10090 GN=Pola1 PE=1 SV=2	41.92	0.904837	0.51
Q8K596	Sodium/calcium exchanger 2 OS=Mus musculus OX=10090 GN=Slc8a2 PE=1 SV=1	66.02	0.904837	0.34
Q3UH93	Plexin-D1 OS=Mus musculus OX=10090 GN=Plxnd1 PE=1 SV=1	35.17	0.904837	0.35
Q0P5W1	Vacuolar protein sorting-associated protein 8 homolog OS=Mus musculus OX=10090 GN=Vps8 PE=1 SV=1	58.01	0.904837	0.37
Q99MI1	ELKS/Rab6-interacting/CAST family member 1 OS=Mus musculus OX=10090 GN=Erc1 PE=1 SV=1	38.78	0.913931	0.38
Q02858	Angiopoietin-1 receptor OS=Mus musculus OX=10090 GN=Tek PE=1 SV=2	65.18	0.913931	0.43
Q5DTN8	Janus kinase and microtubule-interacting protein 3 OS=Mus musculus OX=10090 GN=Jakmip3 PE=1 SV=2	132.1	0.913931	0.31
Q6VV64	Potassium channel subfamily K member 18 OS=Mus musculus OX=10090 GN=Kcnk18 PE=1 SV=1	31.63	0.913931	0.46
Q6P1G0	HEAT repeat-containing protein 6 OS=Mus musculus OX=10090 GN=Heatr6 PE=1 SV=1	35.84	0.923116	0.42
Q80YA9	Connector enhancer of kinase suppressor of ras 2 OS=Mus musculus OX=10090 GN=Cnksr2 PE=1 SV=1	102.62	0.923116	0.41
Q9JIB6	Baculoviral IAP repeat-containing protein 1f OS=Mus musculus OX=10090 GN=Naip6 PE=1 SV=2	42.4	0.923116	0.45
Q9Z1N2	Origin recognition complex subunit 1 OS=Mus musculus OX=10090 GN=Orc1 PE=1 SV=2	116.08	0.923116	0.48
Q7TSC1	Protein PRRC2A OS=Mus musculus OX=10090 GN=Prrc2a PE=1 SV=1	47.19	0.923116	0.34
P17141	Zinc finger protein 37 OS=Mus musculus OX=10090 GN=Zfp37 PE=2 SV=4	94.75	0.923116	0.4
Q8K441	ATP-binding cassette sub-family A member 6 OS=Mus musculus OX=10090 GN=Abca6 PE=1 SV=2	27.61	0.923116	0.4
Q30D77	Collagen alpha-1(XXIV) chain OS=Mus musculus OX=10090 GN=Col24a1 PE=2 SV=2	69.65	0.923116	0.37
P27870	Proto-oncogene vav OS=Mus musculus OX=10090 GN=Vav1 PE=1 SV=1	8.64	0.932394	0.38
O88379	Bromodomain adjacent to zinc finger domain protein 1A OS=Mus musculus OX=10090 GN=Baz1a PE=1 SV=3	61.79	0.932394	0.41
Q9CXH7	Shugoshin 1 OS=Mus musculus OX=10090 GN=Sgo1 PE=2 SV=1	54.54	0.932394	0.43
P97386	DNA ligase 3 OS=Mus musculus OX=10090 GN=Lig3 PE=1 SV=2	69.59	0.932394	0.38
P97333	Neuropilin-1 OS=Mus musculus OX=10090 GN=Nrp1 PE=1 SV=2	48.53	0.932394	0.39
Q923J1	Transient receptor potential cation channel subfamily M member 7 OS=Mus musculus OX=10090 GN=Trpm7 PE=1 SV=1	48.53	0.932394	0.38
Q7TQG1	Pleckstrin homology domain-containing family A member 6 OS=Mus musculus OX=10090 GN=Plekha6 PE=1 SV=1	36.14	0.932394	0.42
Q64096	Guanine nucleotide exchange factor DBS OS=Mus musculus OX=10090 GN=Mcf2l PE=1 SV=2	25.57	0.941765	0.38
A2AF47	Dedicator of cytokinesis protein 11 OS=Mus musculus OX=10090 GN=Dock11 PE=1 SV=1	44.42	0.941765	0.34
P48754	Breast cancer type 1 susceptibility protein homolog OS=Mus musculus OX=10090 GN=Brca1 PE=1 SV=3	58.6	0.941765	0.46
Q9Z1K7	Adenomatous polyposis coli protein 2 OS=Mus musculus OX=10090 GN=Apc2 PE=1 SV=1	49.52	0.941765	0.34
P97953	Vascular endothelial growth factor C OS=Mus musculus OX=10090 GN=Vegfc PE=1 SV=1	202.85	0.941765	0.48
Q9R016	Baculoviral IAP repeat-containing protein 1e OS=Mus musculus OX=10090 GN=Naip5 PE=1 SV=3	48.87	0.951229	0.5
P61407	Tudor domain-containing protein 6 OS=Mus musculus OX=10090 GN=Tdrd6 PE=1 SV=1	59.98	0.951229	0.42
P35123	Ubiquitin carboxyl-terminal hydrolase 4 OS=Mus musculus OX=10090 GN=Usp4 PE=1 SV=3	53.82	0.951229	0.46
Q80SY5	Pre-mRNA-splicing factor 38B OS=Mus musculus OX=10090 GN=Prpf38b PE=1 SV=1	65.04	0.951229	0.36
Q5NCI0	Up-regulator of cell proliferation OS=Mus musculus OX=10090 GN=Urgcp PE=2 SV=1	56.18	0.951229	0.43
B2RU80	Receptor-type tyrosine-protein phosphatase beta OS=Mus musculus OX=10090 GN=Ptprb PE=1 SV=1	74.42	0.951229	0.41
O35674	Disintegrin and metalloproteinase domain-containing protein 19 OS=Mus musculus OX=10090 GN=Adam19 PE=2 SV=2	64.4	0.951229	0.48
Q3U962	Collagen alpha-2(V) chain OS=Mus musculus OX=10090 GN=Col5a2 PE=1 SV=1	146.21	0.960789	0.46
O08759	Ubiquitin-protein ligase E3A OS=Mus musculus OX=10090 GN=Ube3a PE=1 SV=2	128.72	0.960789	0.4
Q8R0H9	ADP-ribosylation factor-binding protein GGA1 OS=Mus musculus OX=10090 GN=Gga1 PE=1 SV=1	62.69	0.960789	0.4
P97358	TATA box-binding protein-associated factor RNA polymerase I subunit B OS=Mus musculus OX=10090 GN=Taf1b PE=1 SV=2	57.21	0.960789	0.47
Q3UNH4	G protein-regulated inducer of neurite outgrowth 1 OS=Mus musculus OX=10090 GN=Gprin1 PE=1 SV=2	82.38	0.960789	0.43
Q3U319	E3 ubiquitin-protein ligase BRE1B OS=Mus musculus OX=10090 GN=Rnf40 PE=1 SV=2	57.53	0.960789	0.45
Q62376	U1 small nuclear ribonucleoprotein 70 kDa OS=Mus musculus OX=10090 GN=Snrnp70 PE=1 SV=2	142.43	0.960789	0.4
Q9JM99	Proteoglycan 4 OS=Mus musculus OX=10090 GN=Prg4 PE=1 SV=2	91.18	0.970446	0.42
Q3UQ22	Netrin-5 OS=Mus musculus OX=10090 GN=Ntn5 PE=2 SV=2	35.45	0.970446	0.46
Q66JQ7	Kinetochore scaffold 1 OS=Mus musculus OX=10090 GN=Knl1 PE=1 SV=3	70.14	0.970446	0.52
Q6DIC0	Probable global transcription activator SNF2L2 OS=Mus musculus OX=10090 GN=Smarca2 PE=1 SV=1	52.53	0.970446	0.47
Q920R0	Alsin OS=Mus musculus OX=10090 GN=Als2 PE=1 SV=3	58.11	0.970446	0.45
Q7TS63	Zinc finger protein ZFAT OS=Mus musculus OX=10090 GN=Zfat PE=1 SV=2	69.83	0.970446	0.47
O55222	Integrin-linked protein kinase OS=Mus musculus OX=10090 GN=Ilk PE=1 SV=2	61.11	0.970446	0.43
Q8BIK4	Dedicator of cytokinesis protein 9 OS=Mus musculus OX=10090 GN=Dock9 PE=1 SV=2	44.05	0.970446	0.49
Q5SFM8	RNA-binding protein 27 OS=Mus musculus OX=10090 GN=Rbm27 PE=1 SV=3	55.5	0.980199	0.47
Q9QUK4	Baculoviral IAP repeat-containing protein 1b OS=Mus musculus OX=10090 GN=Naip2 PE=1 SV=2	29.7	0.980199	0.45
Q14AT2	Testis-expressed protein 11 OS=Mus musculus OX=10090 GN=Tex11 PE=1 SV=1	26.31	0.980199	0.48
Q8BZ21	Histone acetyltransferase KAT6A OS=Mus musculus OX=10090 GN=Kat6a PE=1 SV=2	97.12	0.980199	0.47
Q8BKT7	THO complex subunit 5 homolog OS=Mus musculus OX=10090 GN=Thoc5 PE=1 SV=2	40.83	0.980199	0.63
Q8R313	Exocyst complex component 6 OS=Mus musculus OX=10090 GN=Exoc6 PE=1 SV=2	108.4	0.980199	0.53
Q812A2	SLIT-ROBO Rho GTPase-activating protein 3 OS=Mus musculus OX=10090 GN=Srgap3 PE=1 SV=1	28.69	0.99005	0.45
Q62136	Tyrosine-protein phosphatase non-receptor type 21 OS=Mus musculus OX=10090 GN=Ptpn21 PE=1 SV=1	56.86	0.99005	0.42
Q5SXJ3	Fanconi anemia group J protein homolog OS=Mus musculus OX=10090 GN=Brip1 PE=2 SV=1	141.39	0.99005	0.45
P61622	Integrin alpha-11 OS=Mus musculus OX=10090 GN=Itga11 PE=1 SV=1	84.01	0.99005	0.49
P27790	Major centromere autoantigen B OS=Mus musculus OX=10090 GN=Cenpb PE=2 SV=2	138.74	0.99005	0.47
O35126	Atrophin-1 OS=Mus musculus OX=10090 GN=Atn1 PE=1 SV=1	9.1	0.99005	0.54
Q9QWK5	Baculoviral IAP repeat-containing protein 1a OS=Mus musculus OX=10090 GN=Naip1 PE=2 SV=3	43.46	0.99005	0.48
Q562E2	BTB/POZ domain-containing protein KCTD19 OS=Mus musculus OX=10090 GN=Kctd19 PE=1 SV=2	137.86	0.99005	0.52
P35969	Vascular endothelial growth factor receptor 1 OS=Mus musculus OX=10090 GN=Flt1 PE=1 SV=1	42.52	0.99005	0.46
Q3UV71	Transmembrane and TPR repeat-containing protein 1 OS=Mus musculus OX=10090 GN=Tmtc1 PE=2 SV=2	35.33	0.99005	0.51
D3Z4R1	Probable ATP-dependent DNA helicase HFM1 OS=Mus musculus OX=10090 GN=Hfm1 PE=3 SV=2	130.24	0.99005	0.51
P25799	Nuclear factor NF-kappa-B p105 subunit OS=Mus musculus OX=10090 GN=Nfkb1 PE=1 SV=2	70.8	0.99005	0.49
Q62130	Tyrosine-protein phosphatase non-receptor type 14 OS=Mus musculus OX=10090 GN=Ptpn14 PE=1 SV=2	13.01	1	0.66
Q8C6J9	NACHT, LRR and PYD domains-containing protein 4B OS=Mus musculus OX=10090 GN=Nlrp4b PE=2 SV=1	103.53	1	0.5
Q99PP2	Zinc finger protein 318 OS=Mus musculus OX=10090 GN=Znf318 PE=1 SV=3	138.34	1	0.52
Q52KI8	Serine/arginine repetitive matrix protein 1 OS=Mus musculus OX=10090 GN=Srrm1 PE=1 SV=2	76.7	1	0.47
A2ATD1	Isthmin-1 OS=Mus musculus OX=10090 GN=Ism1 PE=1 SV=1	55.16	1	0.47
Q6P1G2	Lysine-specific demethylase 2B OS=Mus musculus OX=10090 GN=Kdm2b PE=1 SV=1	72.23	1	0.46
Q9DBE9	pre-rRNA processing protein FTSJ3 OS=Mus musculus OX=10090 GN=Ftsj3 PE=1 SV=1	8.39	1	0.55
Q80TJ7	Histone lysine demethylase PHF8 OS=Mus musculus OX=10090 GN=Phf8 PE=1 SV=2	94.51	1	0.47
Q80TG1	KAT8 regulatory NSL complex subunit 1 OS=Mus musculus OX=10090 GN=Kansl1 PE=1 SV=1	45.2	1	0.49
Q3UHU5	Microtubule cross-linking factor 1 OS=Mus musculus OX=10090 GN=Mtcl1 PE=1 SV=1	54.67	1	0.48
A0A087WPF7	Autism susceptibility gene 2 protein homolog OS=Mus musculus OX=10090 GN=Auts2 PE=1 SV=2	83.13	1	0.54
Q9WTU3	Sodium channel protein type 8 subunit alpha OS=Mus musculus OX=10090 GN=Scn8a PE=1 SV=1	62.21	1	0.53
Q9CU62	Structural maintenance of chromosomes protein 1A OS=Mus musculus OX=10090 GN=Smc1a PE=1 SV=4	78.05	1.01005	0.52
Q80TZ9	Arginine-glutamic acid dipeptide repeats protein OS=Mus musculus OX=10090 GN=Rere PE=1 SV=3	133.49	1.01005	0.47
Q8R5F7	Interferon-induced helicase C domain-containing protein 1 OS=Mus musculus OX=10090 GN=Ifih1 PE=1 SV=1	93.96	1.01005	0.5
Q3TYU2	Probable cation-transporting ATPase 13A5 OS=Mus musculus OX=10090 GN=Atp13a5 PE=2 SV=2	177.31	1.01005	0.51
Q6PB66	Leucine-rich PPR motif-containing protein, mitochondrial OS=Mus musculus OX=10090 GN=Lrpprc PE=1 SV=2	70.76	1.01005	0.5
Q8BZN6	Dedicator of cytokinesis protein 10 OS=Mus musculus OX=10090 GN=Dock10 PE=1 SV=3	89.91	1.0202	0.57
Q8K4L0	ATP-dependent RNA helicase DDX54 OS=Mus musculus OX=10090 GN=Ddx54 PE=1 SV=1	17.58	1.0202	0.48
Q7M6Y6	Maestro heat-like repeat-containing protein family member 2B OS=Mus musculus OX=10090 GN=Mroh2b PE=1 SV=2	66.37	1.0202	0.56
Q62245	Son of sevenless homolog 1 OS=Mus musculus OX=10090 GN=Sos1 PE=1 SV=2	67.49	1.0202	0.46
Q8BHL8	Proteasome inhibitor PI31 subunit OS=Mus musculus OX=10090 GN=Psmf1 PE=1 SV=1	6.18	1.03045	0.52
Q9QXL1	Kinesin-like protein KIF21B OS=Mus musculus OX=10090 GN=Kif21b PE=1 SV=2	35.87	1.03045	0.48
A2APX8	Sodium channel protein type 1 subunit alpha OS=Mus musculus OX=10090 GN=Scn1a PE=1 SV=1	61.85	1.03045	0.48
Q61087	Laminin subunit beta-3 OS=Mus musculus OX=10090 GN=Lamb3 PE=1 SV=2	67.41	1.03045	0.54
Q5U4C3	Splicing factor, arginine/serine-rich 19 OS=Mus musculus OX=10090 GN=Scaf1 PE=1 SV=1	13.68	1.04081	0.56
Q8BGH2	Sorting and assembly machinery component 50 homolog OS=Mus musculus OX=10090 GN=Samm50 PE=1 SV=1	22.6	1.04081	0.52
P70670	Nascent polypeptide-associated complex subunit alpha, muscle-specific form OS=Mus musculus OX=10090 GN=Naca PE=1 SV=2	80.68	1.04081	0.59
Q61188	Histone-lysine N-methyltransferase EZH2 OS=Mus musculus OX=10090 GN=Ezh2 PE=1 SV=2	174.55	1.04081	0.53
Q9Z1Q9	Valine--tRNA ligase OS=Mus musculus OX=10090 GN=Vars PE=1 SV=1	37.4	1.04081	0.56
Q3UVX5	Metabotropic glutamate receptor 5 OS=Mus musculus OX=10090 GN=Grm5 PE=1 SV=2	53.87	1.04081	0.54
Q9ERC8	Down syndrome cell adhesion molecule homolog OS=Mus musculus OX=10090 GN=Dscam PE=1 SV=1	91.57	1.04081	0.56
Q8VDD5	Myosin-9 OS=Mus musculus OX=10090 GN=Myh9 PE=1 SV=4	71.29	1.04081	0.48
Q6PIX5	Inactive rhomboid protein 1 OS=Mus musculus OX=10090 GN=Rhbdf1 PE=1 SV=2	71.11	1.05127	0.51
Q5XKE0	Myosin-binding protein C, fast-type OS=Mus musculus OX=10090 GN=Mybpc2 PE=1 SV=1	99.96	1.05127	0.53
P09838	DNA nucleotidylexotransferase OS=Mus musculus OX=10090 GN=Dntt PE=1 SV=3	12.2	1.06184	0.55
Q8CH25	SAFB-like transcription modulator OS=Mus musculus OX=10090 GN=Sltm PE=1 SV=1	224.73	1.06184	0.58
Q69ZN7	Myoferlin OS=Mus musculus OX=10090 GN=Myof PE=1 SV=2	58.74	1.06184	0.66
Q52KF3	Protein spire homolog 1 OS=Mus musculus OX=10090 GN=Spire1 PE=1 SV=1	78.65	1.07251	0.66
Q80WT0	Junctophilin-4 OS=Mus musculus OX=10090 GN=Jph4 PE=2 SV=1	92.1	1.07251	0.48
Q8CIE6	Coatomer subunit alpha OS=Mus musculus OX=10090 GN=Copa PE=1 SV=2	32.77	1.07251	0.51
P70336	Rho-associated protein kinase 2 OS=Mus musculus OX=10090 GN=Rock2 PE=1 SV=1	66.46	1.07251	0.56
Q80UV9	Transcription initiation factor TFIID subunit 1 OS=Mus musculus OX=10090 GN=Taf1 PE=1 SV=2	80.96	1.07251	0.57
Q91YE7	RNA-binding protein 5 OS=Mus musculus OX=10090 GN=Rbm5 PE=1 SV=1	97.37	1.07251	0.59
P11103	Poly [ADP-ribose] polymerase 1 OS=Mus musculus OX=10090 GN=Parp1 PE=1 SV=3	27.27	1.08329	0.63
Q9QUR8	Semaphorin-7A OS=Mus musculus OX=10090 GN=Sema7a PE=1 SV=1	30.44	1.08329	0.63
B2RXC1	Trafficking protein particle complex subunit 11 OS=Mus musculus OX=10090 GN=Trappc11 PE=1 SV=1	37.94	1.08329	0.58
O54988	STE20-like serine/threonine-protein kinase OS=Mus musculus OX=10090 GN=Slk PE=1 SV=2	97.77	1.08329	0.61
Q69Z37	Sterile alpha motif domain-containing protein 9-like OS=Mus musculus OX=10090 GN=Samd9l PE=1 SV=2	54.85	1.08329	0.63
P49194	Retinol-binding protein 3 OS=Mus musculus OX=10090 GN=Rbp3 PE=2 SV=3	17.97	1.09417	0.54
Q9Z2Q2	Lysine-rich nucleolar protein 1 OS=Mus musculus OX=10090 GN=Knop1 PE=1 SV=2	20.79	1.09417	0.59
Q60662	A-kinase anchor protein 4 OS=Mus musculus OX=10090 GN=Akap4 PE=1 SV=1	29.51	1.09417	0.71
Q3TB82	Pleckstrin homology domain-containing family F member 1 OS=Mus musculus OX=10090 GN=Plekhf1 PE=2 SV=1	141.65	1.09417	0.56
Q80TM9	Nischarin OS=Mus musculus OX=10090 GN=Nisch PE=1 SV=2	45.37	1.09417	0.68
G5E8K5	Ankyrin-3 OS=Mus musculus OX=10090 GN=Ank3 PE=1 SV=1	58.25	1.09417	0.63
Q6V4S5	Protein sidekick-2 OS=Mus musculus OX=10090 GN=Sdk2 PE=1 SV=1	89.26	1.10517	0.57
Q80V72	Inositol hexakisphosphate kinase 2 OS=Mus musculus OX=10090 GN=Ip6k2 PE=2 SV=2	92.93	1.10517	0.54
Q5DTM8	E3 ubiquitin-protein ligase BRE1A OS=Mus musculus OX=10090 GN=Rnf20 PE=1 SV=2	58.21	1.10517	0.67
Q9ER64	Oxysterol-binding protein-related protein 5 OS=Mus musculus OX=10090 GN=Osbpl5 PE=1 SV=3	52.82	1.10517	0.51
A6H619	PHD and RING finger domain-containing protein 1 OS=Mus musculus OX=10090 GN=Phrf1 PE=1 SV=2	114.23	1.10517	0.67
B9EJV3	GREB1-like protein OS=Mus musculus OX=10090 GN=Greb1l PE=2 SV=1	79.62	1.11628	0.65
B7ZMP1	Probable Xaa-Pro aminopeptidase 3 OS=Mus musculus OX=10090 GN=Xpnpep3 PE=1 SV=1	93.83	1.11628	0.6
Q0KK55	Kinase non-catalytic C-lobe domain-containing protein 1 OS=Mus musculus OX=10090 GN=Kndc1 PE=1 SV=2	34.63	1.11628	0.61
Q9JIX8	Apoptotic chromatin condensation inducer in the nucleus OS=Mus musculus OX=10090 GN=Acin1 PE=1 SV=3	133.73	1.11628	0.67
E9Q784	Zinc finger CCCH domain-containing protein 13 OS=Mus musculus OX=10090 GN=Zc3h13 PE=1 SV=1	484.42	1.11628	0.73
Q3UHK3	Protein GREB1 OS=Mus musculus OX=10090 GN=Greb1 PE=2 SV=2	55.34	1.11628	0.62
Q3TKT4	Transcription activator BRG1 OS=Mus musculus OX=10090 GN=Smarca4 PE=1 SV=1	67.52	1.11628	0.83
Q8C1F5	Tetratricopeptide repeat protein 16 OS=Mus musculus OX=10090 GN=Ttc16 PE=2 SV=1	77.05	1.1275	0.66
Q8VHD8	Hornerin OS=Mus musculus OX=10090 GN=Hrnr PE=1 SV=1	58.26	1.1275	0.7
Q5RJI5	Serine/threonine-protein kinase BRSK1 OS=Mus musculus OX=10090 GN=Brsk1 PE=1 SV=1	79.93	1.1275	0.7
Q5DTW7	Uncharacterized protein KIAA1551 OS=Mus musculus OX=10090 GN=Kiaa1551 PE=1 SV=2	75.68	1.1275	0.62
Q8CGB3	Uveal autoantigen with coiled-coil domains and ankyrin repeats OS=Mus musculus OX=10090 GN=Uaca PE=1 SV=2	104.22	1.1275	0.71
Q8BYG9	Ephrin type-A receptor 10 OS=Mus musculus OX=10090 GN=Epha10 PE=2 SV=2	48.22	1.1275	0.63
Q9ESD7	Dysferlin OS=Mus musculus OX=10090 GN=Dysf PE=1 SV=3	74.81	1.1275	0.55
Q7TPM1	Protein PRRC2B OS=Mus musculus OX=10090 GN=Prrc2b PE=1 SV=1	121.39	1.1275	0.69
B2RY04	Dedicator of cytokinesis protein 5 OS=Mus musculus OX=10090 GN=Dock5 PE=1 SV=2	22.31	1.13883	0.64
Q8R3S6	Exocyst complex component 1 OS=Mus musculus OX=10090 GN=Exoc1 PE=1 SV=4	14.45	1.13883	0.5
Q6NWV3	Intraflagellar transport protein 122 homolog OS=Mus musculus OX=10090 GN=Ift122 PE=1 SV=1	33.37	1.15027	0.66
B9EJR8	Dynein assembly factor 5, axonemal OS=Mus musculus OX=10090 GN=Dnaaf5 PE=1 SV=1	60.2	1.15027	0.57
P49025	Citron Rho-interacting kinase OS=Mus musculus OX=10090 GN=Cit PE=1 SV=3	66.88	1.15027	0.79
Q02357	Ankyrin-1 OS=Mus musculus OX=10090 GN=Ank1 PE=1 SV=2	40.08	1.15027	0.57
P18052	Receptor-type tyrosine-protein phosphatase alpha OS=Mus musculus OX=10090 GN=Ptpra PE=1 SV=3	40.93	1.16183	0.63
Q6NZL0	Protein SOGA3 OS=Mus musculus OX=10090 GN=Soga3 PE=1 SV=2	82.19	1.16183	0.78
Q9R1L5	Microtubule-associated serine/threonine-protein kinase 1 OS=Mus musculus OX=10090 GN=Mast1 PE=1 SV=3	105.28	1.16183	0.56
O88492	Perilipin-4 OS=Mus musculus OX=10090 GN=Plin4 PE=1 SV=2	22.94	1.16183	0.57
B9EJA2	Cortactin-binding protein 2 OS=Mus musculus OX=10090 GN=Cttnbp2 PE=1 SV=2	42.1	1.17351	0.69
Q6P9L6	Kinesin-like protein KIF15 OS=Mus musculus OX=10090 GN=Kif15 PE=1 SV=1	57.58	1.17351	0.72
Q91ZQ1	Cone cGMP-specific 3',5'-cyclic phosphodiesterase subunit alpha' OS=Mus musculus OX=10090 GN=Pde6c PE=2 SV=1	92.76	1.17351	0.71
Q7TSH8	Transmembrane protein 94 OS=Mus musculus OX=10090 GN=Tmem94 PE=1 SV=1	55.75	1.17351	0.76
Q80U49	Centrosomal protein of 170 kDa protein B OS=Mus musculus OX=10090 GN=Cep170b PE=1 SV=2	99.64	1.17351	0.87
Q2EG98	Polycystic kidney disease protein 1-like 3 OS=Mus musculus OX=10090 GN=Pkd1l3 PE=1 SV=2	33.55	1.17351	0.6
Q61543	Golgi apparatus protein 1 OS=Mus musculus OX=10090 GN=Glg1 PE=1 SV=1	43.72	1.1853	0.77
P16054	Protein kinase C epsilon type OS=Mus musculus OX=10090 GN=Prkce PE=1 SV=1	77.56	1.1853	0.58
Q9DBR2	Protein FAM13C OS=Mus musculus OX=10090 GN=Fam13c PE=1 SV=2	119.15	1.1853	0.61
Q3UVR3	Tau-tubulin kinase 2 OS=Mus musculus OX=10090 GN=Ttbk2 PE=1 SV=1	71.86	1.1853	0.69
A2AM05	Centlein OS=Mus musculus OX=10090 GN=Cntln PE=1 SV=1	81.55	1.1853	0.83
Q8R4H2	Rho guanine nucleotide exchange factor 12 OS=Mus musculus OX=10090 GN=Arhgef12 PE=1 SV=2	99.15	1.1853	0.69
B1AZI6	THO complex subunit 2 OS=Mus musculus OX=10090 GN=Thoc2 PE=1 SV=1	46.55	1.1853	0.61
E5FYH1	Protein TOPAZ1 OS=Mus musculus OX=10090 GN=Topaz1 PE=2 SV=1	65.9	1.19722	0.69
Q811D2	Ankyrin repeat domain-containing protein 26 OS=Mus musculus OX=10090 GN=Ankrd26 PE=1 SV=2	30.81	1.19722	0.9
Q8C1B1	Calmodulin-regulated spectrin-associated protein 2 OS=Mus musculus OX=10090 GN=Camsap2 PE=1 SV=3	49.11	1.19722	0.87
Q8C115	Pleckstrin homology domain-containing family H member 2 OS=Mus musculus OX=10090 GN=Plekhh2 PE=1 SV=3	98.63	1.19722	0.62
Q6DFV3	Rho GTPase-activating protein 21 OS=Mus musculus OX=10090 GN=Arhgap21 PE=1 SV=1	87.52	1.19722	0.77
Q91Z69	SLIT-ROBO Rho GTPase-activating protein 1 OS=Mus musculus OX=10090 GN=Srgap1 PE=1 SV=2	38.73	1.19722	0.9
Q9JKY5	Huntingtin-interacting protein 1-related protein OS=Mus musculus OX=10090 GN=Hip1r PE=1 SV=2	52.14	1.20925	0.61
P97393	Rho GTPase-activating protein 5 OS=Mus musculus OX=10090 GN=Arhgap5 PE=1 SV=2	98.38	1.20925	0.73
Q80XI3	Eukaryotic translation initiation factor 4 gamma 3 OS=Mus musculus OX=10090 GN=Eif4g3 PE=1 SV=2	75.57	1.20925	0.71
Q68FE9	Teashirt homolog 2 OS=Mus musculus OX=10090 GN=Tshz2 PE=1 SV=1	24.71	1.20925	0.76
Q8BGE7	Tripartite motif-containing protein 6 OS=Mus musculus OX=10090 GN=Trim6 PE=1 SV=1	8.77	1.2214	0.59
P02468	Laminin subunit gamma-1 OS=Mus musculus OX=10090 GN=Lamc1 PE=1 SV=2	18.9	1.2214	0.83
Q6P5E4	UDP-glucose:glycoprotein glucosyltransferase 1 OS=Mus musculus OX=10090 GN=Uggt1 PE=1 SV=4	50.45	1.2214	0.63
Q61765	Keratin, type I cuticular Ha1 OS=Mus musculus OX=10090 GN=Krt31 PE=1 SV=2	52.49	1.2214	0.64
Q5XJE5	RNA polymerase-associated protein LEO1 OS=Mus musculus OX=10090 GN=Leo1 PE=1 SV=2	198.33	1.23368	0.76
Q9QXL2	Kinesin-like protein KIF21A OS=Mus musculus OX=10090 GN=Kif21a PE=1 SV=2	59.38	1.23368	0.84
O35083	1-acyl-sn-glycerol-3-phosphate acyltransferase alpha OS=Mus musculus OX=10090 GN=Agpat1 PE=1 SV=1	62.63	1.23368	0.56
Q69ZL1	FYVE, RhoGEF and PH domain-containing protein 6 OS=Mus musculus OX=10090 GN=Fgd6 PE=1 SV=2	64.02	1.23368	0.88
Q6P5H2	Nestin OS=Mus musculus OX=10090 GN=Nes PE=1 SV=1	41.66	1.23368	0.6
Q684R7	FRAS1-related extracellular matrix protein 1 OS=Mus musculus OX=10090 GN=Frem1 PE=1 SV=1	102.77	1.24608	0.82
P40201	Chromodomain-helicase-DNA-binding protein 1 OS=Mus musculus OX=10090 GN=Chd1 PE=1 SV=3	73.34	1.24608	0.82
Q6DYE8	Ectonucleotide pyrophosphatase/phosphodiesterase family member 3 OS=Mus musculus OX=10090 GN=Enpp3 PE=1 SV=2	41.17	1.24608	0.63
P53569	CCAAT/enhancer-binding protein zeta OS=Mus musculus OX=10090 GN=Cebpz PE=1 SV=2	19.01	1.24608	0.71
Q8CIB9	N-acetyltransferase ESCO2 OS=Mus musculus OX=10090 GN=Esco2 PE=2 SV=3	41.47	1.24608	0.78
Q8CH18	Cell division cycle and apoptosis regulator protein 1 OS=Mus musculus OX=10090 GN=Ccar1 PE=1 SV=1	88.86	1.24608	0.57
O88537	Formyl peptide receptor-related sequence 3 OS=Mus musculus OX=10090 GN=Fpr-rs3 PE=2 SV=2	172.79	1.24608	0.58
P13705	DNA mismatch repair protein Msh3 OS=Mus musculus OX=10090 GN=Msh3 PE=2 SV=3	83.4	1.24608	0.67
Q5SX79	Protein Shroom1 OS=Mus musculus OX=10090 GN=Shroom1 PE=1 SV=2	15.62	1.2586	0.6
P97504	Cytoplasmic tyrosine-protein kinase BMX OS=Mus musculus OX=10090 GN=Bmx PE=2 SV=1	15.25	1.2586	0.76
Q8JZY2	COMM domain-containing protein 10 OS=Mus musculus OX=10090 GN=Commd10 PE=1 SV=1	85.32	1.2586	0.59
Q99MX1	Ubiquitin carboxyl-terminal hydrolase 26 OS=Mus musculus OX=10090 GN=Usp26 PE=1 SV=2	70.43	1.2586	0.76
Q99KG3	RNA-binding protein 10 OS=Mus musculus OX=10090 GN=Rbm10 PE=1 SV=1	47.42	1.2586	0.69
P59764	Dedicator of cytokinesis protein 4 OS=Mus musculus OX=10090 GN=Dock4 PE=1 SV=1	155.92	1.2586	0.91
Q61818	Retinoic acid-induced protein 1 OS=Mus musculus OX=10090 GN=Rai1 PE=1 SV=3	52.08	1.2586	0.72
O35082	Klotho OS=Mus musculus OX=10090 GN=Kl PE=1 SV=2	94.92	1.27125	0.78
Q8C0T9	Adenylate cyclase type 10 OS=Mus musculus OX=10090 GN=Adcy10 PE=1 SV=2	34.82	1.27125	0.77
P23804	E3 ubiquitin-protein ligase Mdm2 OS=Mus musculus OX=10090 GN=Mdm2 PE=1 SV=3	101.21	1.27125	0.7
Q9D2K4	IQ domain-containing protein H OS=Mus musculus OX=10090 GN=Iqch PE=2 SV=3	54.52	1.27125	0.83
Q6PCX9	E3 ubiquitin-protein ligase TRIM37 OS=Mus musculus OX=10090 GN=Trim37 PE=1 SV=1	78.08	1.27125	0.99
P62082	40S ribosomal protein S7 OS=Mus musculus OX=10090 GN=Rps7 PE=2 SV=1	99.99	1.28403	0.75
Q80YX1	Tenascin OS=Mus musculus OX=10090 GN=Tnc PE=1 SV=1	147.54	1.28403	0.87
A2A891	Calmodulin-binding transcription activator 1 OS=Mus musculus OX=10090 GN=Camta1 PE=2 SV=1	17.48	1.28403	0.77
Q8C0M0	GATOR complex protein WDR59 OS=Mus musculus OX=10090 GN=Wdr59 PE=1 SV=2	119.8	1.28403	0.7
Q5PSV9	Mediator of DNA damage checkpoint protein 1 OS=Mus musculus OX=10090 GN=Mdc1 PE=1 SV=1	162.41	1.28403	0.66
Q8CG16	Complement C1r-A subcomponent OS=Mus musculus OX=10090 GN=C1ra PE=1 SV=1	87.45	1.28403	0.67
Q8VE11	Myotubularin-related protein 6 OS=Mus musculus OX=10090 GN=Mtmr6 PE=1 SV=1	74.88	1.28403	0.84
Q8VDD9	PH-interacting protein OS=Mus musculus OX=10090 GN=Phip PE=1 SV=2	53.55	1.28403	0.76
Q9QY06	Unconventional myosin-IXb OS=Mus musculus OX=10090 GN=Myo9b PE=1 SV=2	62.01	1.29693	0.95
Q9JJZ9	Cyclic nucleotide-gated cation channel beta-3 OS=Mus musculus OX=10090 GN=Cngb3 PE=1 SV=1	54.99	1.29693	0.74
O70576	Cohesin subunit SA-3 OS=Mus musculus OX=10090 GN=Stag3 PE=1 SV=2	107.77	1.29693	0.83
Q8K2H1	Periphilin-1 OS=Mus musculus OX=10090 GN=Pphln1 PE=1 SV=1	116.56	1.29693	0.77
Q9WUF3	CASP8-associated protein 2 OS=Mus musculus OX=10090 GN=Casp8ap2 PE=1 SV=2	92.49	1.29693	0.91
Q0VEJ0	Centrosomal protein of 76 kDa OS=Mus musculus OX=10090 GN=Cep76 PE=1 SV=1	19.38	1.30996	0.72
Q8R0S1	Cyclic AMP-dependent transcription factor ATF-7 OS=Mus musculus OX=10090 GN=Atf7 PE=2 SV=1	138.35	1.30996	0.61
Q99NH2	Partitioning defective 3 homolog OS=Mus musculus OX=10090 GN=Pard3 PE=1 SV=2	31.76	1.30996	0.6
Q8C2E4	Pentatricopeptide repeat-containing protein 1, mitochondrial OS=Mus musculus OX=10090 GN=Ptcd1 PE=2 SV=2	74.91	1.30996	0.71
A2AMT1	Filensin OS=Mus musculus OX=10090 GN=Bfsp1 PE=1 SV=1	23.13	1.30996	0.85
Q569Z5	Probable ATP-dependent RNA helicase DDX46 OS=Mus musculus OX=10090 GN=Ddx46 PE=1 SV=2	58.96	1.30996	0.86
Q9EQT6	Synaptotagmin-13 OS=Mus musculus OX=10090 GN=Syt13 PE=1 SV=1	2.28	1.30996	0.66
G3UZ78	Androglobin OS=Mus musculus OX=10090 GN=Adgb PE=1 SV=1	49.12	1.30996	0.95
Q6NXK2	Zinc finger protein 532 OS=Mus musculus OX=10090 GN=Znf532 PE=1 SV=1	113.36	1.32313	0.8
Q6PH08	ERC protein 2 OS=Mus musculus OX=10090 GN=Erc2 PE=1 SV=2	38.98	1.32313	0.72
P41230	Lysine-specific demethylase 5C OS=Mus musculus OX=10090 GN=Kdm5c PE=1 SV=4	76.7	1.32313	0.88
P21440	Phosphatidylcholine translocator ABCB4 OS=Mus musculus OX=10090 GN=Abcb4 PE=1 SV=2	133.97	1.32313	0.83
Q80XL6	Acyl-CoA dehydrogenase family member 11 OS=Mus musculus OX=10090 GN=Acad11 PE=1 SV=2	43.81	1.33643	0.62
P45376	Aldose reductase OS=Mus musculus OX=10090 GN=Akr1b1 PE=1 SV=3	26.01	1.33643	0.72
O08746	Matrilin-2 OS=Mus musculus OX=10090 GN=Matn2 PE=2 SV=2	87.35	1.34986	0.71
Q8BRB7	Histone acetyltransferase KAT6B OS=Mus musculus OX=10090 GN=Kat6b PE=1 SV=3	41.52	1.34986	0.97
Q9DAZ9	Abscission/NoCut checkpoint regulator OS=Mus musculus OX=10090 GN=Zfyve19 PE=1 SV=2	60.05	1.34986	0.65
Q99104	Unconventional myosin-Va OS=Mus musculus OX=10090 GN=Myo5a PE=1 SV=2	59.91	1.34986	1
Q6PE65	G patch domain-containing protein 2-like OS=Mus musculus OX=10090 GN=Gpatch2l PE=1 SV=1	53.54	1.34986	0.75
P28665	Murinoglobulin-1 OS=Mus musculus OX=10090 GN=Mug1 PE=1 SV=3	58.46	1.34986	0.91
P06795	Multidrug resistance protein 1B OS=Mus musculus OX=10090 GN=Abcb1b PE=1 SV=1	48.82	1.34986	0.72
Q9EPU4	Cleavage and polyadenylation specificity factor subunit 1 OS=Mus musculus OX=10090 GN=Cpsf1 PE=1 SV=1	30.95	1.34986	0.68
O88327	Alpha-catulin OS=Mus musculus OX=10090 GN=Ctnnal1 PE=1 SV=1	101.84	1.36343	0.68
Q8C5N3	Pre-mRNA-splicing factor CWC22 homolog OS=Mus musculus OX=10090 GN=Cwc22 PE=1 SV=1	120.12	1.36343	0.73
Q6ZQ58	La-related protein 1 OS=Mus musculus OX=10090 GN=Larp1 PE=1 SV=3	58.06	1.36343	0.87
Q76LL6	FH1/FH2 domain-containing protein 3 OS=Mus musculus OX=10090 GN=Fhod3 PE=1 SV=1	114.29	1.36343	0.73
G5E870	E3 ubiquitin-protein ligase TRIP12 OS=Mus musculus OX=10090 GN=Trip12 PE=1 SV=1	81.92	1.37713	0.86
Q60769	Tumor necrosis factor alpha-induced protein 3 OS=Mus musculus OX=10090 GN=Tnfaip3 PE=1 SV=2	161.84	1.37713	0.87
Q9CSB4	Partitioning defective 3 homolog B OS=Mus musculus OX=10090 GN=Pard3b PE=1 SV=2	71.14	1.37713	0.76
Q8CGM2	Retinitis pigmentosa 1-like 1 protein OS=Mus musculus OX=10090 GN=Rp1l1 PE=1 SV=1	31.66	1.37713	0.89
Q7TQA1	Immunoglobulin superfamily member 1 OS=Mus musculus OX=10090 GN=Igsf1 PE=1 SV=1	38.13	1.37713	0.87
Q8K0F1	TBC1 domain family member 23 OS=Mus musculus OX=10090 GN=Tbc1d23 PE=1 SV=1	187.49	1.39097	0.72
Q9JMB7	Piwi-like protein 1 OS=Mus musculus OX=10090 GN=Piwil1 PE=1 SV=1	198.93	1.39097	0.79
Q0VGY8	Protein TANC1 OS=Mus musculus OX=10090 GN=Tanc1 PE=1 SV=2	92.37	1.39097	0.77
Q62018	RNA polymerase-associated protein CTR9 homolog OS=Mus musculus OX=10090 GN=Ctr9 PE=1 SV=2	83.58	1.40495	0.81
Q9JJV9	Sodium channel protein type 5 subunit alpha OS=Mus musculus OX=10090 GN=Scn5a PE=1 SV=2	94.6	1.40495	0.89
O35071	Kinesin-like protein KIF1C OS=Mus musculus OX=10090 GN=Kif1c PE=1 SV=2	150.73	1.40495	0.84
Q6ZQJ5	DNA replication ATP-dependent helicase/nuclease DNA2 OS=Mus musculus OX=10090 GN=Dna2 PE=1 SV=2	35.34	1.40495	0.85
Q8C0C4	Serine-rich coiled-coil domain-containing protein 1 OS=Mus musculus OX=10090 GN=Ccser1 PE=2 SV=2	34.05	1.40495	0.73
Q6A051	Attractin-like protein 1 OS=Mus musculus OX=10090 GN=Atrnl1 PE=1 SV=2	68.55	1.40495	0.84
Q8CH77	Neuron navigator 1 OS=Mus musculus OX=10090 GN=Nav1 PE=1 SV=2	41.78	1.41907	0.94
Q80TY4	Suppression of tumorigenicity 18 protein OS=Mus musculus OX=10090 GN=St18 PE=2 SV=2	98.17	1.41907	0.84
Q8CG03	cGMP-specific 3',5'-cyclic phosphodiesterase OS=Mus musculus OX=10090 GN=Pde5a PE=1 SV=2	52.37	1.41907	0.87
Q52KG5	Kinesin-like protein KIF26A OS=Mus musculus OX=10090 GN=Kif26a PE=1 SV=2	51.13	1.43333	0.85
Q9JLM4	Zinc finger MYM-type protein 3 OS=Mus musculus OX=10090 GN=Zmym3 PE=1 SV=1	57.25	1.43333	0.68
P98195	Probable phospholipid-transporting ATPase IIB OS=Mus musculus OX=10090 GN=Atp9b PE=1 SV=4	33.96	1.44773	0.91
Q9QZ05	eIF-2-alpha kinase GCN2 OS=Mus musculus OX=10090 GN=Eif2ak4 PE=1 SV=2	37.37	1.44773	0.83
O88703	Potassium/sodium hyperpolarization-activated cyclic nucleotide-gated channel 2 OS=Mus musculus OX=10090 GN=Hcn2 PE=1 SV=1	51.9	1.44773	0.9
Q3TYX8	RUN and FYVE domain-containing protein 4 OS=Mus musculus OX=10090 GN=Rufy4 PE=2 SV=3	115.73	1.44773	0.73
P97857	A disintegrin and metalloproteinase with thrombospondin motifs 1 OS=Mus musculus OX=10090 GN=Adamts1 PE=1 SV=4	33.34	1.44773	0.97
G5E8I7	Ubiquitin carboxyl-terminal hydrolase 17-like protein C OS=Mus musculus OX=10090 GN=Usp17lc PE=1 SV=1	83.22	1.44773	0.87
G5E8G2	Ubiquitin carboxyl-terminal hydrolase 17-like protein D OS=Mus musculus OX=10090 GN=Usp17ld PE=1 SV=1	22.03	1.44773	0.82
Q3UPH7	Rho guanine nucleotide exchange factor 40 OS=Mus musculus OX=10090 GN=Arhgef40 PE=1 SV=1	96.92	1.46228	0.82
P70168	Importin subunit beta-1 OS=Mus musculus OX=10090 GN=Kpnb1 PE=1 SV=2	56.81	1.46228	0.82
Q6PDI5	Proteasome adapter and scaffold protein ECM29 OS=Mus musculus OX=10090 GN=Ecpas PE=1 SV=3	53.12	1.46228	0.87
Q91YK2	Ribosomal RNA processing protein 1 homolog B OS=Mus musculus OX=10090 GN=Rrp1b PE=1 SV=2	31.41	1.46228	0.68
Q91XT6	Tandem C2 domains nuclear protein OS=Mus musculus OX=10090 GN=Tc2n PE=1 SV=2	46.74	1.46228	0.82
Q6NZN1	Peroxisome proliferator-activated receptor gamma coactivator-related protein 1 OS=Mus musculus OX=10090 GN=Pprc1 PE=1 SV=1	90.64	1.46228	0.76
Q6Y685	Transforming acidic coiled-coil-containing protein 1 OS=Mus musculus OX=10090 GN=Tacc1 PE=1 SV=1	31.11	1.47698	0.81
A2ASQ1	Agrin OS=Mus musculus OX=10090 GN=Agrn PE=1 SV=1	71.76	1.47698	0.89
Q80X82	Symplekin OS=Mus musculus OX=10090 GN=Sympk PE=1 SV=1	103.64	1.47698	0.83
Q6ZQ06	Centrosomal protein of 162 kDa OS=Mus musculus OX=10090 GN=Cep162 PE=1 SV=2	36.21	1.47698	0.73
Q62240	Lysine-specific demethylase 5D OS=Mus musculus OX=10090 GN=Kdm5d PE=2 SV=2	113.86	1.47698	0.99
Q149T7	Protein phosphatase 1J OS=Mus musculus OX=10090 GN=Ppm1j PE=1 SV=1	253.93	1.49182	0.91
Q3UXZ9	Lysine-specific demethylase 5A OS=Mus musculus OX=10090 GN=Kdm5a PE=1 SV=2	58.52	1.49182	0.97
Q8CI03	FLYWCH-type zinc finger-containing protein 1 OS=Mus musculus OX=10090 GN=Flywch1 PE=1 SV=2	88.35	1.49182	0.78
Q80V62	Fanconi anemia group D2 protein homolog OS=Mus musculus OX=10090 GN=Fancd2 PE=1 SV=2	73.24	1.49182	0.94
Q8VE97	Serine/arginine-rich splicing factor 4 OS=Mus musculus OX=10090 GN=Srsf4 PE=2 SV=1	82.84	1.49182	0.95
Q9D180	Cilia- and flagella-associated protein 57 OS=Mus musculus OX=10090 GN=Cfap57 PE=1 SV=3	70.53	1.49182	0.93
Q6P4T2	U5 small nuclear ribonucleoprotein 200 kDa helicase OS=Mus musculus OX=10090 GN=Snrnp200 PE=1 SV=1	70.16	1.49182	0.73
O08742	Platelet glycoprotein V OS=Mus musculus OX=10090 GN=Gp5 PE=1 SV=1	2.42	1.50682	0.78
Q3LAC4	Phosphatidylinositol 3,4,5-trisphosphate-dependent Rac exchanger 2 protein OS=Mus musculus OX=10090 GN=Prex2 PE=1 SV=2	16.51	1.50682	0.91
Q80Z38	SH3 and multiple ankyrin repeat domains protein 2 OS=Mus musculus OX=10090 GN=Shank2 PE=1 SV=2	41.36	1.50682	0.73
A3KGV1	Outer dense fiber protein 2 OS=Mus musculus OX=10090 GN=Odf2 PE=1 SV=1	117.63	1.50682	0.99
Q3UTZ3	Uncharacterized protein C7orf43 homolog OS=Mus musculus OX=10090 PE=1 SV=1	110.4	1.50682	0.72
Q8CDM8	Protein FAM160B1 OS=Mus musculus OX=10090 GN=Fam160b1 PE=1 SV=2	136.48	1.50682	0.85
Q6P5D3	Putative ATP-dependent RNA helicase DHX57 OS=Mus musculus OX=10090 GN=Dhx57 PE=1 SV=2	115.94	1.50682	0.97
Q91V04	Translocating chain-associated membrane protein 1 OS=Mus musculus OX=10090 GN=Tram1 PE=1 SV=3	5.61	1.52196	0.8
Q61122	NGFI-A-binding protein 1 OS=Mus musculus OX=10090 GN=Nab1 PE=1 SV=2	23.09	1.52196	0.92
Q9JI39	ATP-binding cassette sub-family B member 10, mitochondrial OS=Mus musculus OX=10090 GN=Abcb10 PE=1 SV=1	59.53	1.52196	0.67
Q80X41	Serine/threonine-protein kinase VRK1 OS=Mus musculus OX=10090 GN=Vrk1 PE=1 SV=2	27.75	1.52196	0.79
Q7TSK7	ADAMTS-like protein 2 OS=Mus musculus OX=10090 GN=Adamtsl2 PE=2 SV=1	17.2	1.52196	0.71
Q8C6K9	Collagen alpha-6(VI) chain OS=Mus musculus OX=10090 GN=Col6a6 PE=1 SV=2	62.09	1.53726	0.99
Q6WKZ8	E3 ubiquitin-protein ligase UBR2 OS=Mus musculus OX=10090 GN=Ubr2 PE=1 SV=2	62.16	1.53726	0.87
Q9WV92	Band 4.1-like protein 3 OS=Mus musculus OX=10090 GN=Epb41l3 PE=1 SV=1	41.86	1.53726	0.91
Q9QZQ1	Afadin OS=Mus musculus OX=10090 GN=Afdn PE=1 SV=3	37.07	1.55271	0.83
Q8BGW0	Protein THEMIS OS=Mus musculus OX=10090 GN=Themis PE=1 SV=1	121.5	1.55271	0.75
Q8BSN3	Coiled-coil domain-containing protein 151 OS=Mus musculus OX=10090 GN=Ccdc151 PE=2 SV=1	64.45	1.55271	0.8
Q9EST1	Gasdermin-A OS=Mus musculus OX=10090 GN=Gsdma PE=2 SV=1	8.37	1.55271	0.74
P48193	Protein 4.1 OS=Mus musculus OX=10090 GN=Epb41 PE=1 SV=2	62.56	1.55271	0.99
O88566	Axin-2 OS=Mus musculus OX=10090 GN=Axin2 PE=1 SV=2	43.26	1.55271	0.83
O55098	Serine/threonine-protein kinase 10 OS=Mus musculus OX=10090 GN=Stk10 PE=1 SV=2	48.74	1.56831	0.97
Q80XB4	Nebulin-related-anchoring protein OS=Mus musculus OX=10090 GN=Nrap PE=1 SV=3	88.8	1.56831	0.99
Q8R418	Endoribonuclease Dicer OS=Mus musculus OX=10090 GN=Dicer1 PE=1 SV=3	58.39	1.56831	0.95
P58871	182 kDa tankyrase-1-binding protein OS=Mus musculus OX=10090 GN=Tnks1bp1 PE=1 SV=2	154.72	1.58407	0.78
P70392	Ras-specific guanine nucleotide-releasing factor 2 OS=Mus musculus OX=10090 GN=Rasgrf2 PE=1 SV=2	107.31	1.58407	0.92
P09405	Nucleolin OS=Mus musculus OX=10090 GN=Ncl PE=1 SV=2	196.44	1.58407	0.96
Q8CEE6	PAS domain-containing serine/threonine-protein kinase OS=Mus musculus OX=10090 GN=Pask PE=1 SV=3	17.48	1.58407	0.97
Q8VDF3	Death-associated protein kinase 2 OS=Mus musculus OX=10090 GN=Dapk2 PE=1 SV=1	271.82	1.58407	0.89
Q8R151	NFX1-type zinc finger-containing protein 1 OS=Mus musculus OX=10090 GN=Znfx1 PE=1 SV=3	96.37	1.59999	0.82
Q5SVR0	TBC1 domain family member 9B OS=Mus musculus OX=10090 GN=Tbc1d9b PE=1 SV=1	101.52	1.59999	0.83
Q8VHH5	Arf-GAP with GTPase, ANK repeat and PH domain-containing protein 3 OS=Mus musculus OX=10090 GN=Agap3 PE=1 SV=1	39.08	1.59999	0.69
P34152	Focal adhesion kinase 1 OS=Mus musculus OX=10090 GN=Ptk2 PE=1 SV=3	35.67	1.59999	0.82
Q91YQ5	Dolichyl-diphosphooligosaccharide--protein glycosyltransferase subunit 1 OS=Mus musculus OX=10090 GN=Rpn1 PE=1 SV=1	57.23	1.59999	0.86
Q91VJ5	Polyglutamine-binding protein 1 OS=Mus musculus OX=10090 GN=Pqbp1 PE=1 SV=1	2.63	1.61607	0.75
Q64GA5	Cytosolic phospholipase A2 gamma OS=Mus musculus OX=10090 GN=Pla2g4c PE=1 SV=1	29.85	1.61607	0.66
Q8BLI0	ADAMTS-like protein 1 OS=Mus musculus OX=10090 GN=Adamtsl1 PE=2 SV=2	163.3	1.61607	0.98
Q61467	Zinc finger protein ZIC 4 OS=Mus musculus OX=10090 GN=Zic4 PE=1 SV=2	40.08	1.63232	0.71
Q99MJ9	ATP-dependent RNA helicase DDX50 OS=Mus musculus OX=10090 GN=Ddx50 PE=2 SV=1	16.7	1.63232	0.9
Q8VID5	ATP-dependent DNA helicase Q5 OS=Mus musculus OX=10090 GN=Recql5 PE=1 SV=1	112.06	1.63232	0.84
Q6GQW0	Ankyrin repeat and BTB/POZ domain-containing protein BTBD11 OS=Mus musculus OX=10090 GN=Btbd11 PE=2 SV=2	92.63	1.63232	0.94
Q3U1V8	Mitogen-activated protein kinase kinase kinase 9 OS=Mus musculus OX=10090 GN=Map3k9 PE=2 SV=2	107.41	1.63232	0.99
Q9R0B7	Zinc finger protein 346 OS=Mus musculus OX=10090 GN=Znf346 PE=1 SV=1	7.16	1.63232	0.83
P13504	Interleukin-1 receptor type 1 OS=Mus musculus OX=10090 GN=Il1r1 PE=1 SV=1	98.32	1.64872	0.7
P01027	Complement C3 OS=Mus musculus OX=10090 GN=C3 PE=1 SV=3	97.97	1.64872	0.97
Q9QVP9	Protein-tyrosine kinase 2-beta OS=Mus musculus OX=10090 GN=Ptk2b PE=1 SV=2	109.78	1.66529	0.99
Q61043	Ninein OS=Mus musculus OX=10090 GN=Nin PE=1 SV=4	127.1	1.66529	0.93
Q6PDQ2	Chromodomain-helicase-DNA-binding protein 4 OS=Mus musculus OX=10090 GN=Chd4 PE=1 SV=1	110.3	1.66529	0.93
Q8VE73	Cullin-7 OS=Mus musculus OX=10090 GN=Cul7 PE=1 SV=2	126.69	1.66529	0.95
Q7SIG6	Arf-GAP with SH3 domain, ANK repeat and PH domain-containing protein 2 OS=Mus musculus OX=10090 GN=Asap2 PE=1 SV=3	22.29	1.66529	0.89
Q7TT23	Uncharacterized protein C20orf194 homolog OS=Mus musculus OX=10090 PE=1 SV=2	37.76	1.68203	0.86
Q8BFX3	BTB/POZ domain-containing protein KCTD3 OS=Mus musculus OX=10090 GN=Kctd3 PE=1 SV=1	244.16	1.69893	0.89
P35235	Tyrosine-protein phosphatase non-receptor type 11 OS=Mus musculus OX=10090 GN=Ptpn11 PE=1 SV=2	77.68	1.69893	0.9
Q9Z0Y7	Insulin receptor substrate 4 OS=Mus musculus OX=10090 GN=Irs4 PE=1 SV=2	56.61	1.69893	0.95
P58069	Ras GTPase-activating protein 2 OS=Mus musculus OX=10090 GN=Rasa2 PE=1 SV=2	110.58	1.69893	0.8
Q8VDQ9	Protein KRI1 homolog OS=Mus musculus OX=10090 GN=Kri1 PE=1 SV=3	109.29	1.69893	0.85
Q3UQ44	Ras GTPase-activating-like protein IQGAP2 OS=Mus musculus OX=10090 GN=Iqgap2 PE=1 SV=2	28.84	1.71601	0.81
D3YZU1	SH3 and multiple ankyrin repeat domains protein 1 OS=Mus musculus OX=10090 GN=Shank1 PE=1 SV=1	54.41	1.71601	1
Q6T3U4	NPC1-like intracellular cholesterol transporter 1 OS=Mus musculus OX=10090 GN=Npc1l1 PE=2 SV=1	43.08	1.71601	0.95
P39054	Dynamin-2 OS=Mus musculus OX=10090 GN=Dnm2 PE=1 SV=2	34.85	1.71601	0.98
Q8BW75	Amine oxidase [flavin-containing] B OS=Mus musculus OX=10090 GN=Maob PE=1 SV=4	23.43	1.71601	0.92
Q8K327	Chromosome alignment-maintaining phosphoprotein 1 OS=Mus musculus OX=10090 GN=Champ1 PE=1 SV=1	26.97	1.71601	0.88
Q99PL5	Ribosome-binding protein 1 OS=Mus musculus OX=10090 GN=Rrbp1 PE=1 SV=2	75.98	1.73325	1
Q3TUF7	YEATS domain-containing protein 2 OS=Mus musculus OX=10090 GN=Yeats2 PE=1 SV=2	31.43	1.73325	0.94
P28740	Kinesin-like protein KIF2A OS=Mus musculus OX=10090 GN=Kif2a PE=1 SV=2	16.21	1.73325	0.9
E9Q3L2	Phosphatidylinositol 4-kinase alpha OS=Mus musculus OX=10090 GN=Pi4ka PE=1 SV=2	32.4	1.73325	0.99
Q9Z1T6	1-phosphatidylinositol 3-phosphate 5-kinase OS=Mus musculus OX=10090 GN=Pikfyve PE=1 SV=3	107.89	1.75067	1
Q3U492	Kielin/chordin-like protein OS=Mus musculus OX=10090 GN=Kcp PE=1 SV=2	147.57	1.78604	0.98
Q7M764	Ubiquitin carboxyl-terminal hydrolase 17-like protein E OS=Mus musculus OX=10090 GN=Usp17le PE=3 SV=2	22.64	1.78604	0.95
B9EKI3	TATA element modulatory factor OS=Mus musculus OX=10090 GN=Tmf1 PE=1 SV=2	78.08	1.80399	0.75
Q52KR2	Leucine-rich repeats and immunoglobulin-like domains protein 2 OS=Mus musculus OX=10090 GN=Lrig2 PE=1 SV=1	145.94	1.80399	0.84
Q60992	Guanine nucleotide exchange factor VAV2 OS=Mus musculus OX=10090 GN=Vav2 PE=1 SV=1	63.44	1.80399	1
Q921R4	DnaJ homolog subfamily C member 14 OS=Mus musculus OX=10090 GN=Dnajc14 PE=2 SV=2	68.35	1.80399	0.95
Q80VC9	Calmodulin-regulated spectrin-associated protein 3 OS=Mus musculus OX=10090 GN=Camsap3 PE=1 SV=1	60.21	1.80399	0.99
Q8CH09	SURP and G-patch domain-containing protein 2 OS=Mus musculus OX=10090 GN=Sugp2 PE=1 SV=2	54.48	1.80399	0.98
Q8BRN9	Coiled-coil and C2 domain-containing protein 1B OS=Mus musculus OX=10090 GN=Cc2d1b PE=1 SV=1	36.45	1.82212	0.87
Q6ZPF3	T-lymphoma invasion and metastasis-inducing protein 2 OS=Mus musculus OX=10090 GN=Tiam2 PE=1 SV=2	41.84	1.82212	0.77
Q8BJQ9	Chondroitin sulfate N-acetylgalactosaminyltransferase 1 OS=Mus musculus OX=10090 GN=Csgalnact1 PE=2 SV=1	33.56	1.82212	0.86
Q9WV02	RNA-binding motif protein, X chromosome OS=Mus musculus OX=10090 GN=Rbmx PE=1 SV=1	174.19	1.82212	0.86
Q66X19	NACHT, LRR and PYD domains-containing protein 4E OS=Mus musculus OX=10090 GN=Nlrp4e PE=2 SV=2	28.77	1.84043	0.97
Q7TMM8	Mono [ADP-ribose] polymerase PARP16 OS=Mus musculus OX=10090 GN=Parp16 PE=1 SV=2	59.36	1.85893	0.9
Q8BUY8	G-protein coupled receptor-associated sorting protein 2 OS=Mus musculus OX=10090 GN=Gprasp2 PE=1 SV=2	143.27	1.85893	0.96
Q6PG95	Protein cramped-like OS=Mus musculus OX=10090 GN=Cramp1 PE=1 SV=3	141.34	1.87761	0.97
Q61245	Collagen alpha-1(XI) chain OS=Mus musculus OX=10090 GN=Col11a1 PE=1 SV=2	51.03	1.89648	0.96
C3VPR6	Protein NLRC5 OS=Mus musculus OX=10090 GN=Nlrc5 PE=1 SV=2	22.41	1.91554	0.92
Q8BYW1	Rho GTPase-activating protein 25 OS=Mus musculus OX=10090 GN=Arhgap25 PE=1 SV=2	177.58	1.91554	0.98
P70270	DNA repair and recombination protein RAD54-like OS=Mus musculus OX=10090 GN=Rad54l PE=1 SV=2	23.84	1.93479	0.93
Q91ZB0	Alpha-protein kinase 2 OS=Mus musculus OX=10090 GN=Alpk2 PE=2 SV=3	126.05	1.93479	0.89
Q8R0S4	Voltage-dependent L-type calcium channel subunit beta-4 OS=Mus musculus OX=10090 GN=Cacnb4 PE=1 SV=2	24.28	1.95424	0.72
P59242	Cingulin OS=Mus musculus OX=10090 GN=Cgn PE=1 SV=1	62.59	1.95424	0.99
P59384	A disintegrin and metalloproteinase with thrombospondin motifs 15 OS=Mus musculus OX=10090 GN=Adamts15 PE=2 SV=2	88.91	1.97388	0.98
P58501	PAX3- and PAX7-binding protein 1 OS=Mus musculus OX=10090 GN=Paxbp1 PE=1 SV=3	46.76	1.97388	0.86
O88833	Cytochrome P450 4A10 OS=Mus musculus OX=10090 GN=Cyp4a10 PE=2 SV=2	54.81	1.97388	0.87
Q9CWR7	Metalloreductase STEAP1 OS=Mus musculus OX=10090 GN=Steap1 PE=1 SV=2	49.8	1.99372	0.71
A2ANX9	Zinc finger protein 711 OS=Mus musculus OX=10090 GN=Znf711 PE=3 SV=1	21.97	1.99372	0.99
Q3US17	Zinc finger protein 48 OS=Mus musculus OX=10090 GN=Znf48 PE=1 SV=2	53.45	2.03399	0.94
Q9DBV3	Probable ATP-dependent RNA helicase DHX34 OS=Mus musculus OX=10090 GN=Dhx34 PE=1 SV=2	26.81	2.05443	0.84
Q69ZH9	Rho GTPase-activating protein 23 OS=Mus musculus OX=10090 GN=Arhgap23 PE=1 SV=2	85.29	2.07508	0.99
Q6PCM1	Lysine-specific demethylase 3A OS=Mus musculus OX=10090 GN=Kdm3a PE=1 SV=1	73.5	2.07508	0.1
Q61410	cGMP-dependent protein kinase 2 OS=Mus musculus OX=10090 GN=Prkg2 PE=1 SV=1	48.47	2.09594	0.99
Q78PY7	Staphylococcal nuclease domain-containing protein 1 OS=Mus musculus OX=10090 GN=Snd1 PE=1 SV=1	49.95	2.09594	0.93			Up- Regulated
Q61712	DnaJ homolog subfamily C member 1 OS=Mus musculus OX=10090 GN=Dnajc1 PE=1 SV=1	179.33	2.09594	0.98
O08644	Ephrin type-B receptor 6 OS=Mus musculus OX=10090 GN=Ephb6 PE=2 SV=4	57.2	2.117	0.82
Q2TV84	Transient receptor potential cation channel subfamily M member 1 OS=Mus musculus OX=10090 GN=Trpm1 PE=2 SV=2	70.19	2.117	0.99
Q9DBT3	Coiled-coil domain-containing protein 97 OS=Mus musculus OX=10090 GN=Ccdc97 PE=1 SV=1	163.38	2.117	0.96
Q3UYK3	TBC1 domain family member 9 OS=Mus musculus OX=10090 GN=Tbc1d9 PE=2 SV=2	34.44	2.13828	0.82
Q8BXZ1	Protein disulfide-isomerase TMX3 OS=Mus musculus OX=10090 GN=Tmx3 PE=1 SV=2	78.36	2.13828	0.85
Q60520	Paired amphipathic helix protein Sin3a OS=Mus musculus OX=10090 GN=Sin3a PE=1 SV=3	56.89	2.15977	0.91
A2AVR2	Maestro heat-like repeat-containing protein family member 7 OS=Mus musculus OX=10090 GN=Mroh7 PE=3 SV=1	44.46	2.2034	1
Q3U821	WD repeat-containing protein 75 OS=Mus musculus OX=10090 GN=Wdr75 PE=1 SV=1	56.32	2.2034	0.75
O35253	Mothers against decapentaplegic homolog 7 OS=Mus musculus OX=10090 GN=Smad7 PE=1 SV=1	124.06	2.24791	0.76
Q8CIQ7	Dedicator of cytokinesis protein 3 OS=Mus musculus OX=10090 GN=Dock3 PE=1 SV=1	61.43	2.24791	1
Q5IR70	Cancer-associated gene 1 protein homolog OS=Mus musculus OX=10090 GN=Cage1 PE=1 SV=2	72.97	2.24791	1
Q8VDG6	Mitogen-activated protein kinase kinase kinase 21 OS=Mus musculus OX=10090 GN=Map3k21 PE=1 SV=2	63.8	2.24791	0.97
Q6P549	Phosphatidylinositol 3,4,5-trisphosphate 5-phosphatase 2 OS=Mus musculus OX=10090 GN=Inppl1 PE=1 SV=1	58.2	2.24791	0.98
P55937	Golgin subfamily A member 3 OS=Mus musculus OX=10090 GN=Golga3 PE=1 SV=3	96.77	2.29332	0.96
Q8R3N1	Nucleolar protein 14 OS=Mus musculus OX=10090 GN=Nop14 PE=1 SV=2	79.3	2.29332	0.99
O88207	Collagen alpha-1(V) chain OS=Mus musculus OX=10090 GN=Col5a1 PE=1 SV=2	59.36	2.31637	0.93
Q9Z103	Activity-dependent neuroprotector homeobox protein OS=Mus musculus OX=10090 GN=Adnp PE=1 SV=2	89.03	2.31637	1
Q91V83	TELO2-interacting protein 1 homolog OS=Mus musculus OX=10090 GN=Tti1 PE=1 SV=2	15.61	2.33965	0.98
Q80WJ6	Multidrug resistance-associated protein 9 OS=Mus musculus OX=10090 GN=Abcc12 PE=2 SV=1	13.84	2.33965	0.99
Q8CGM1	Adhesion G protein-coupled receptor B2 OS=Mus musculus OX=10090 GN=Adgrb2 PE=1 SV=2	27.72	2.33965	1
Q9WTP5	Cadherin-22 OS=Mus musculus OX=10090 GN=Cdh22 PE=2 SV=2	14.61	2.36316	0.97
Q09M02	Cytosolic carboxypeptidase-like protein 5 OS=Mus musculus OX=10090 GN=Agbl5 PE=1 SV=2	67.6	2.36316	1
Q8C262	Interferon-inducible GTPase 5 OS=Mus musculus OX=10090 GN=Irgc PE=1 SV=1	52.61	2.38691	0.82
Q8R5C8	Zinc finger MYND domain-containing protein 11 OS=Mus musculus OX=10090 GN=Zmynd11 PE=1 SV=2	38.62	2.4109	0.99
Q9Z280	Phospholipase D1 OS=Mus musculus OX=10090 GN=Pld1 PE=1 SV=1	41.71	2.4596	0.98
O35134	DNA-directed RNA polymerase I subunit RPA1 OS=Mus musculus OX=10090 GN=Polr1a PE=1 SV=2	66.4	2.55998	0.97
P70298	Homeobox protein cut-like 2 OS=Mus musculus OX=10090 GN=Cux2 PE=2 SV=2	52.91	2.55998	0.81
Q02788	Collagen alpha-2(VI) chain OS=Mus musculus OX=10090 GN=Col6a2 PE=1 SV=3	122.36	2.58571	1
B9EJ80	PDZ domain-containing protein 8 OS=Mus musculus OX=10090 GN=Pdzd8 PE=1 SV=1	125.57	2.63794	0.92
Q9Z315	U4/U6.U5 tri-snRNP-associated protein 1 OS=Mus musculus OX=10090 GN=Sart1 PE=1 SV=1	89.04	2.63794	0.92
Q3UHX0	Nucleolar protein 8 OS=Mus musculus OX=10090 GN=Nol8 PE=1 SV=2	36.16	2.7456	0.95
Q922B9	Sperm-specific antigen 2 homolog OS=Mus musculus OX=10090 GN=Ssfa2 PE=1 SV=3	38.63	2.77319	1
O88393	Transforming growth factor beta receptor type 3 OS=Mus musculus OX=10090 GN=Tgfbr3 PE=1 SV=1	40.02	2.85765	0.96
Q60592	Microtubule-associated serine/threonine-protein kinase 2 OS=Mus musculus OX=10090 GN=Mast2 PE=1 SV=1	49.97	2.94468	0.99
Q69Z38	Pseudopodium-enriched atypical kinase 1 OS=Mus musculus OX=10090 GN=Peak1 PE=1 SV=4	55.29	2.94468	1
Q0VF58	Collagen alpha-1(XIX) chain OS=Mus musculus OX=10090 GN=Col19a1 PE=2 SV=2	44.36	3.03436	0.95
Q8K368	Fanconi anemia group I protein homolog OS=Mus musculus OX=10090 GN=Fanci PE=1 SV=2	29.85	3.06485	0.97
Q6P5D4	Centrosomal protein of 135 kDa OS=Mus musculus OX=10090 GN=Cep135 PE=1 SV=1	58.95	3.06485	1
Q9R0L6	Pericentriolar material 1 protein OS=Mus musculus OX=10090 GN=Pcm1 PE=1 SV=2	72.96	3.06485	0.78
Q8BZ81	Leucine-rich repeat transmembrane neuronal protein 3 OS=Mus musculus OX=10090 GN=Lrrtm3 PE=2 SV=2	4.51	3.09566	0.96
Q4QY64	ATPase family AAA domain-containing protein 5 OS=Mus musculus OX=10090 GN=Atad5 PE=1 SV=1	45.34	3.15819	0.99
Q60767	Lymphocyte antigen 75 OS=Mus musculus OX=10090 GN=Ly75 PE=1 SV=2	76.17	3.15819	0.97
Q6PFQ7	Ras GTPase-activating protein 4 OS=Mus musculus OX=10090 GN=Rasa4 PE=1 SV=1	50.73	3.22199	1
Q8CJ19	[F-actin]-monooxygenase MICAL3 OS=Mus musculus OX=10090 GN=Mical3 PE=1 SV=2	92.55	3.28708	1
Q8R2Q4	Ribosome-releasing factor 2, mitochondrial OS=Mus musculus OX=10090 GN=Gfm2 PE=1 SV=2	145.38	3.28708	0.95
Q6PDH0	Pleckstrin homology-like domain family B member 1 OS=Mus musculus OX=10090 GN=Phldb1 PE=1 SV=1	48.26	3.35348	1
Q9D2Y5	Sorting nexin-20 OS=Mus musculus OX=10090 GN=Snx20 PE=1 SV=2	125.27	3.45561	0.96
Q8K1M6	Dynamin-1-like protein OS=Mus musculus OX=10090 GN=Dnm1l PE=1 SV=2	93.75	3.52542	0.98
Q8K4G5	Actin-binding LIM protein 1 OS=Mus musculus OX=10090 GN=Ablim1 PE=1 SV=1	138.74	3.52542	1
Q3TZ89	Protein transport protein Sec31B OS=Mus musculus OX=10090 GN=Sec31b PE=1 SV=2	26.71	3.6693	1
Q9R020	Zinc finger Ran-binding domain-containing protein 2 OS=Mus musculus OX=10090 GN=Zranb2 PE=1 SV=2	71.65	3.74342	1
Q8R3K3	Pentatricopeptide repeat-containing protein 2, mitochondrial OS=Mus musculus OX=10090 GN=Ptcd2 PE=1 SV=1	133.7	3.78104	1
Q8JZX4	Splicing factor 45 OS=Mus musculus OX=10090 GN=Rbm17 PE=1 SV=1	191.31	3.85743	0.96
Q80YR2	Protein FAM160B2 OS=Mus musculus OX=10090 GN=Fam160b2 PE=1 SV=2	82.59	3.89619	1
P18608	Non-histone chromosomal protein HMG-14 OS=Mus musculus OX=10090 GN=Hmgn1 PE=1 SV=2	63.86	4.0552	1
Q80Z10	Astrotactin-2 OS=Mus musculus OX=10090 GN=Astn2 PE=1 SV=2	113.17	4.09596	1
Q69ZZ6	Transmembrane and coiled-coil domains protein 1 OS=Mus musculus OX=10090 GN=Tmcc1 PE=1 SV=2	105.42	4.09596	0.99
Q9D8M4	60S ribosomal protein L7-like 1 OS=Mus musculus OX=10090 GN=Rpl7l1 PE=1 SV=1	98.5	4.13712	1
Q64455	Receptor-type tyrosine-protein phosphatase eta OS=Mus musculus OX=10090 GN=Ptprj PE=1 SV=2	82.44	4.1787	1
Q9CZH8	Coiled-coil domain-containing protein 77 OS=Mus musculus OX=10090 GN=Ccdc77 PE=1 SV=1	68.39	4.2207	1
P19426	Negative elongation factor E OS=Mus musculus OX=10090 GN=Nelfe PE=1 SV=2	233.74	4.2207	1
Q8BYR2	Serine/threonine-protein kinase LATS1 OS=Mus musculus OX=10090 GN=Lats1 PE=1 SV=3	82.67	4.39295	1
O35227	Disintegrin and metalloproteinase domain-containing protein 7 OS=Mus musculus OX=10090 GN=Adam7 PE=2 SV=2	84.53	4.57223	0.99
Q8K1K4	Centromere protein I OS=Mus musculus OX=10090 GN=Cenpi PE=2 SV=1	32.05	4.61818	0.1
Q6ZQK0	Condensin-2 complex subunit D3 OS=Mus musculus OX=10090 GN=Ncapd3 PE=1 SV=3	19.64	4.61818	0.89
Q8R516	E3 ubiquitin-protein ligase MIB2 OS=Mus musculus OX=10090 GN=Mib2 PE=1 SV=2	97.88	4.61818	0.97
Q62190	Macrophage-stimulating protein receptor OS=Mus musculus OX=10090 GN=Mst1r PE=1 SV=3	36.56	4.71147	1
Q5PRF0	HEAT repeat-containing protein 5A OS=Mus musculus OX=10090 GN=Heatr5a PE=1 SV=2	173.88	4.95303	1
Q04592	Proprotein convertase subtilisin/kexin type 5 OS=Mus musculus OX=10090 GN=Pcsk5 PE=1 SV=3	118.56	5.05309	1
Q3UWM4	Lysine-specific demethylase 7A OS=Mus musculus OX=10090 GN=Kdm7a PE=2 SV=2	117.3	5.41948	1
A2ARA8	Integrin alpha-8 OS=Mus musculus OX=10090 GN=Itga8 PE=1 SV=1	111.53	5.52896	0.99
Q80TK0	Uncharacterized protein KIAA1107 OS=Mus musculus OX=10090 GN=Kiaa1107 PE=1 SV=5	56.56	5.69734	0.99
Q8BTT6	Digestive organ expansion factor homolog OS=Mus musculus OX=10090 GN=Diexf PE=2 SV=2	22.27	6.42374	1
Q80TQ2	Ubiquitin carboxyl-terminal hydrolase CYLD OS=Mus musculus OX=10090 GN=Cyld PE=1 SV=2	128.62	7.24274	0.45
O89114	DnaJ homolog subfamily B member 5 OS=Mus musculus OX=10090 GN=Dnajb5 PE=2 SV=1	104.76	7.24274	1
Q8K1N2	Pleckstrin homology-like domain family B member 2 OS=Mus musculus OX=10090 GN=Phldb2 PE=1 SV=2	148.05	7.92482	0.95
Q9DBM2	Peroxisomal bifunctional enzyme OS=Mus musculus OX=10090 GN=Ehhadh PE=1 SV=4	22.72	8.93521	1
Q8CFE4	SCY1-like protein 2 OS=Mus musculus OX=10090 GN=Scyl2 PE=1 SV=1	20.66	11.0232	1
Q8BWZ3	N-alpha-acetyltransferase 25, NatB auxiliary subunit OS=Mus musculus OX=10090 GN=Naa25 PE=1 SV=1	34.99	11.2459	1
Q8VCC9	Spondin-1 OS=Mus musculus OX=10090 GN=Spon1 PE=1 SV=1	14.42	12.0613	0.99
Q8BH53	Cilia- and flagella-associated protein 69 OS=Mus musculus OX=10090 GN=Cfap69 PE=2 SV=1	40.4	13.0658	1
Q99MV7	RING finger protein 17 OS=Mus musculus OX=10090 GN=Rnf17 PE=1 SV=2	80.2	15.487	1
Q9D6A1	Unconventional myosin-Ih OS=Mus musculus OX=10090 GN=Myo1h PE=2 SV=2	25.15	16.9455	1
Q62234	Myomesin-1 OS=Mus musculus OX=10090 GN=Myom1 PE=1 SV=2	79.57	18.1741	1
Q9EPR5	VPS10 domain-containing receptor SorCS2 OS=Mus musculus OX=10090 GN=Sorcs2 PE=1 SV=2	136.48	18.9158	1
Q569L8	Centromere protein J OS=Mus musculus OX=10090 GN=Cenpj PE=2 SV=2	29.79	20.6972	1
P97369	Neutrophil cytosol factor 4 OS=Mus musculus OX=10090 GN=Ncf4 PE=1 SV=2	43.81	23.3361	1
P23116	Eukaryotic translation initiation factor 3 subunit A OS=Mus musculus OX=10090 GN=Eif3a PE=1 SV=5	79.2	24.7791	1
Q9JLG8	Calpain-15 OS=Mus musculus OX=10090 GN=Capn15 PE=1 SV=1	38.93	28.5027	1
Q9D4K7	Coiled-coil domain-containing protein 105 OS=Mus musculus OX=10090 GN=Ccdc105 PE=1 SV=3	24.52	29.3708	0.99
Q8BMA5	Protein NPAT OS=Mus musculus OX=10090 GN=Npat PE=1 SV=2	66.01	38.4747	0.99
Q9QY42	Prosaposin receptor GPR37 OS=Mus musculus OX=10090 GN=Gpr37 PE=2 SV=1	191.96	57.3975	0.23
Q60610	T-lymphoma invasion and metastasis-inducing protein 1 OS=Mus musculus OX=10090 GN=Tiam1 PE=1 SV=1	170.78	126.469	0.2
Q99PP7	E3 ubiquitin-protein ligase TRIM33 OS=Mus musculus OX=10090 GN=Trim33 PE=1 SV=2	92.95	139.77	1
Q8K352	SAM and SH3 domain-containing protein 3 OS=Mus musculus OX=10090 GN=Sash3 PE=1 SV=2	41.94	639.061	1
Q9WTS2	Alpha-(1,6)-fucosyltransferase OS=Mus musculus OX=10090 GN=Fut8 PE=1 SV=2	69.14	Control_MRlabs	Control_MRlabs
Q9WU40	Inner nuclear membrane protein Man1 OS=Mus musculus OX=10090 GN=Lemd3 PE=1 SV=2	24.12	Control_MRlabs	Control_MRlabs
Q91VJ4	Serine/threonine-protein kinase 38 OS=Mus musculus OX=10090 GN=Stk38 PE=1 SV=1	17.9	Control_MRlabs	Control_MRlabs
P98199	Phospholipid-transporting ATPase ID OS=Mus musculus OX=10090 GN=Atp8b2 PE=2 SV=2	67.97	Control_MRlabs	Control_MRlabs
P98197	Probable phospholipid-transporting ATPase IH OS=Mus musculus OX=10090 GN=Atp11a PE=1 SV=1	11.45	Control_MRlabs	Control_MRlabs
Q8BHY8	Sorting nexin-14 OS=Mus musculus OX=10090 GN=Snx14 PE=1 SV=2	71.89	Control_MRlabs	Control_MRlabs
Q9WTR6	Cystine/glutamate transporter OS=Mus musculus OX=10090 GN=Slc7a11 PE=1 SV=1	27.67	Control_MRlabs	Control_MRlabs
Q62189	U1 small nuclear ribonucleoprotein A OS=Mus musculus OX=10090 GN=Snrpa PE=1 SV=3	39.25	Control_MRlabs	Control_MRlabs
Q8BHY2	Nucleolar complex protein 4 homolog OS=Mus musculus OX=10090 GN=Noc4l PE=2 SV=1	109.64	Control_MRlabs	Control_MRlabs
Q9WTR2	Mitogen-activated protein kinase kinase kinase 6 OS=Mus musculus OX=10090 GN=Map3k6 PE=1 SV=4	81.56	Control_MRlabs	Control_MRlabs
Q8K212	Phosphofurin acidic cluster sorting protein 1 OS=Mus musculus OX=10090 GN=Pacs1 PE=1 SV=2	93.07	Control_MRlabs	Control_MRlabs
Q9WTR1	Transient receptor potential cation channel subfamily V member 2 OS=Mus musculus OX=10090 GN=Trpv2 PE=1 SV=2	73.22	Control_MRlabs	Control_MRlabs
Q9WTR0	Matrix metalloproteinase-16 OS=Mus musculus OX=10090 GN=Mmp16 PE=2 SV=3	73.57	Control_MRlabs	Control_MRlabs
P55096	ATP-binding cassette sub-family D member 3 OS=Mus musculus OX=10090 GN=Abcd3 PE=1 SV=2	24.63	Control_MRlabs	Control_MRlabs
Q62181	Semaphorin-3C OS=Mus musculus OX=10090 GN=Sema3c PE=1 SV=2	12.79	Control_MRlabs	Control_MRlabs
Q91VI7	Ribonuclease inhibitor OS=Mus musculus OX=10090 GN=Rnh1 PE=1 SV=1	241.2	Control_MRlabs	Control_MRlabs
Q8BUR4	Dedicator of cytokinesis protein 1 OS=Mus musculus OX=10090 GN=Dock1 PE=1 SV=3	63.77	Control_MRlabs	Control_MRlabs
Q9R097	Kunitz-type protease inhibitor 1 OS=Mus musculus OX=10090 GN=Spint1 PE=1 SV=2	12.71	Control_MRlabs	Control_MRlabs
Q8BI99	Zinc finger protein 879 OS=Mus musculus OX=10090 GN=Znf879 PE=2 SV=1	20.81	Control_MRlabs	Control_MRlabs
Q059U7	Protein inturned OS=Mus musculus OX=10090 GN=Intu PE=1 SV=1	21.52	Control_MRlabs	Control_MRlabs
Q9WTQ5	A-kinase anchor protein 12 OS=Mus musculus OX=10090 GN=Akap12 PE=1 SV=1	24.52	Control_MRlabs	Control_MRlabs
P28301	Protein-lysine 6-oxidase OS=Mus musculus OX=10090 GN=Lox PE=1 SV=1	7.63	Control_MRlabs	Control_MRlabs
Q62179	Semaphorin-4B OS=Mus musculus OX=10090 GN=Sema4b PE=1 SV=2	12.5	Control_MRlabs	Control_MRlabs
Q8R1Z4	Protein phosphatase 1 regulatory subunit 42 OS=Mus musculus OX=10090 GN=Ppp1r42 PE=1 SV=1	150.55	Control_MRlabs	Control_MRlabs
Q62176	RNA-binding protein 38 OS=Mus musculus OX=10090 GN=Rbm38 PE=1 SV=2	5.89	Control_MRlabs	Control_MRlabs
P51960	Myb-related protein A OS=Mus musculus OX=10090 GN=Mybl1 PE=1 SV=2	67.39	Control_MRlabs	Control_MRlabs
P55086	Proteinase-activated receptor 2 OS=Mus musculus OX=10090 GN=F2rl1 PE=1 SV=1	15.14	Control_MRlabs	Control_MRlabs
Q8CCJ9	PHD finger protein 20-like protein 1 OS=Mus musculus OX=10090 GN=Phf20l1 PE=1 SV=2	31.01	Control_MRlabs	Control_MRlabs
Q571F8	Glutaminase liver isoform, mitochondrial OS=Mus musculus OX=10090 GN=Gls2 PE=1 SV=2	10.7	Control_MRlabs	Control_MRlabs
Q8CCJ3	E3 UFM1-protein ligase 1 OS=Mus musculus OX=10090 GN=Ufl1 PE=1 SV=2	20.02	Control_MRlabs	Control_MRlabs
Q64347	Chloride channel protein 1 OS=Mus musculus OX=10090 GN=Clcn1 PE=1 SV=3	33.71	Control_MRlabs	Control_MRlabs
Q6TDU8	Protein CASC1 OS=Mus musculus OX=10090 GN=Casc1 PE=1 SV=1	15.45	Control_MRlabs	Control_MRlabs
A2RSY6	TRMT1-like protein OS=Mus musculus OX=10090 GN=Trmt1l PE=1 SV=1	19.48	Control_MRlabs	Control_MRlabs
Q64345	Interferon-induced protein with tetratricopeptide repeats 3 OS=Mus musculus OX=10090 GN=Ifit3 PE=1 SV=1	72.84	Control_MRlabs	Control_MRlabs
P51954	Serine/threonine-protein kinase Nek1 OS=Mus musculus OX=10090 GN=Nek1 PE=1 SV=2	27.43	Control_MRlabs	Control_MRlabs
Q62167	ATP-dependent RNA helicase DDX3X OS=Mus musculus OX=10090 GN=Ddx3x PE=1 SV=3	65.84	Control_MRlabs	Control_MRlabs
Q62165	Dystroglycan OS=Mus musculus OX=10090 GN=Dag1 PE=1 SV=4	20.96	Control_MRlabs	Control_MRlabs
Q8K1N1	Calcium-independent phospholipase A2-gamma OS=Mus musculus OX=10090 GN=Pnpla8 PE=1 SV=1	53.64	Control_MRlabs	Control_MRlabs
Q6NXN1	SUZ domain-containing protein 1 OS=Mus musculus OX=10090 GN=Szrd1 PE=1 SV=1	277.98	Control_MRlabs	Control_MRlabs
P16332	Methylmalonyl-CoA mutase, mitochondrial OS=Mus musculus OX=10090 GN=Mut PE=1 SV=2	49.8	Control_MRlabs	Control_MRlabs
P16331	Phenylalanine-4-hydroxylase OS=Mus musculus OX=10090 GN=Pah PE=1 SV=4	78.25	Control_MRlabs	Control_MRlabs
Q8CCI5	RING1 and YY1-binding protein OS=Mus musculus OX=10090 GN=Rybp PE=1 SV=1	27.78	Control_MRlabs	Control_MRlabs
Q8BI79	Coiled-coil domain-containing protein 40 OS=Mus musculus OX=10090 GN=Ccdc40 PE=1 SV=1	149.12	Control_MRlabs	Control_MRlabs
Q64338	Calcium/calmodulin-dependent 3',5'-cyclic nucleotide phosphodiesterase 1C OS=Mus musculus OX=10090 GN=Pde1c PE=1 SV=2	30.09	Control_MRlabs	Control_MRlabs
Q9CZX8	40S ribosomal protein S19 OS=Mus musculus OX=10090 GN=Rps19 PE=1 SV=3	152.97	Control_MRlabs	Control_MRlabs
Q64336	T-box brain protein 1 OS=Mus musculus OX=10090 GN=Tbr1 PE=1 SV=2	28.15	Control_MRlabs	Control_MRlabs
Q64332	Synapsin-2 OS=Mus musculus OX=10090 GN=Syn2 PE=1 SV=2	20.41	Control_MRlabs	Control_MRlabs
Q8R1X6	Spartin OS=Mus musculus OX=10090 GN=Spart PE=1 SV=1	2.91	Control_MRlabs	Control_MRlabs
A2RT91	Ankyrin and armadillo repeat-containing protein OS=Mus musculus OX=10090 GN=Ankar PE=2 SV=1	110.5	Control_MRlabs	Control_MRlabs
Q8K1M4	Zinc finger protein GLIS1 OS=Mus musculus OX=10090 GN=Glis1 PE=2 SV=2	10.76	Control_MRlabs	Control_MRlabs
P51944	Cyclin-F OS=Mus musculus OX=10090 GN=Ccnf PE=2 SV=2	41.45	Control_MRlabs	Control_MRlabs
P55066	Neurocan core protein OS=Mus musculus OX=10090 GN=Ncan PE=1 SV=1	22.24	Control_MRlabs	Control_MRlabs
A2AVQ5	Lymphocyte expansion molecule OS=Mus musculus OX=10090 GN=Lexm PE=2 SV=1	121.9	Control_MRlabs	Control_MRlabs
P98156	Very low-density lipoprotein receptor OS=Mus musculus OX=10090 GN=Vldlr PE=1 SV=1	29.03	Control_MRlabs	Control_MRlabs
P98154	Integral membrane protein DGCR2/IDD OS=Mus musculus OX=10090 GN=Dgcr2 PE=2 SV=1	26.84	Control_MRlabs	Control_MRlabs
P14148	60S ribosomal protein L7 OS=Mus musculus OX=10090 GN=Rpl7 PE=1 SV=2	145.84	Control_MRlabs	Control_MRlabs
Q8CCH2	NHL repeat-containing protein 3 OS=Mus musculus OX=10090 GN=Nhlrc3 PE=1 SV=1	60.25	Control_MRlabs	Control_MRlabs
Q64329	Killer cell lectin-like receptor 3 OS=Mus musculus OX=10090 GN=Klra3 PE=1 SV=2	20.2	Control_MRlabs	Control_MRlabs
Q8BI67	Zinc finger protein 473 homolog OS=Mus musculus OX=10090 GN=Znf473 PE=2 SV=1	29.11	Control_MRlabs	Control_MRlabs
Q9CZW5	Mitochondrial import receptor subunit TOM70 OS=Mus musculus OX=10090 GN=Tomm70 PE=1 SV=2	111.31	Control_MRlabs	Control_MRlabs
Q8K1L5	E3 ubiquitin-protein ligase PPP1R11 OS=Mus musculus OX=10090 GN=Ppp1r11 PE=1 SV=1	67.08	Control_MRlabs	Control_MRlabs
Q3V3F6	Myelin protein zero-like protein 3 OS=Mus musculus OX=10090 GN=Mpzl3 PE=1 SV=3	262.67	Control_MRlabs	Control_MRlabs
Q91VE6	MKI67 FHA domain-interacting nucleolar phosphoprotein OS=Mus musculus OX=10090 GN=Nifk PE=1 SV=1	96.44	Control_MRlabs	Control_MRlabs
Q9CZV8	F-box/LRR-repeat protein 20 OS=Mus musculus OX=10090 GN=Fbxl20 PE=1 SV=3	9.65	Control_MRlabs	Control_MRlabs
Q8K1K9	Histone H4 transcription factor OS=Mus musculus OX=10090 GN=Hinfp PE=2 SV=3	8.12	Control_MRlabs	Control_MRlabs
A2AIV8	Caspase recruitment domain-containing protein 9 OS=Mus musculus OX=10090 GN=Card9 PE=1 SV=1	256.91	Control_MRlabs	Control_MRlabs
Q8BI55	Dual specificity tyrosine-phosphorylation-regulated kinase 4 OS=Mus musculus OX=10090 GN=Dyrk4 PE=2 SV=1	95.53	Control_MRlabs	Control_MRlabs
Q9WTM3	Semaphorin-6C OS=Mus musculus OX=10090 GN=Sema6c PE=2 SV=1	179.61	Control_MRlabs	Control_MRlabs
Q4G5Y1	Kelch domain-containing protein 2 OS=Mus musculus OX=10090 GN=Klhdc2 PE=2 SV=3	1.93	Control_MRlabs	Control_MRlabs
P04351	Interleukin-2 OS=Mus musculus OX=10090 GN=Il2 PE=1 SV=1	167.26	Control_MRlabs	Control_MRlabs
Q6NXK5	RNA/RNP complex-1-interacting phosphatase OS=Mus musculus OX=10090 GN=Dusp11 PE=2 SV=1	64.85	Control_MRlabs	Control_MRlabs
Q8C6M1	Ubiquitin carboxyl-terminal hydrolase 20 OS=Mus musculus OX=10090 GN=Usp20 PE=1 SV=1	160.17	Control_MRlabs	Control_MRlabs
A2RT67	DENN domain-containing protein 3 OS=Mus musculus OX=10090 GN=Dennd3 PE=1 SV=2	50.13	Control_MRlabs	Control_MRlabs
Q8BHS6	Armadillo repeat-containing X-linked protein 3 OS=Mus musculus OX=10090 GN=Armcx3 PE=1 SV=1	52.86	Control_MRlabs	Control_MRlabs
P35487	Pyruvate dehydrogenase E1 component subunit alpha, testis-specific form, mitochondrial OS=Mus musculus OX=10090 GN=Pdha2 PE=1 SV=1	131.15	Control_MRlabs	Control_MRlabs
Q9CZU4	GTPase Era, mitochondrial OS=Mus musculus OX=10090 GN=Eral1 PE=2 SV=1	62.04	Control_MRlabs	Control_MRlabs
Q9CZU3	Exosome RNA helicase MTR4 OS=Mus musculus OX=10090 GN=Mtrex PE=1 SV=1	34.9	Control_MRlabs	Control_MRlabs
Q9WTL4	Insulin receptor-related protein OS=Mus musculus OX=10090 GN=Insrr PE=1 SV=2	19.89	Control_MRlabs	Control_MRlabs
Q8R1U2	Cell growth regulator with EF hand domain protein 1 OS=Mus musculus OX=10090 GN=Cgref1 PE=1 SV=1	473.73	Control_MRlabs	Control_MRlabs
P49615	Cyclin-dependent-like kinase 5 OS=Mus musculus OX=10090 GN=Cdk5 PE=1 SV=1	37.6	Control_MRlabs	Control_MRlabs
Q3URD3	Sarcolemmal membrane-associated protein OS=Mus musculus OX=10090 GN=Slmap PE=1 SV=2	34.99	Control_MRlabs	Control_MRlabs
Q62120	Tyrosine-protein kinase JAK2 OS=Mus musculus OX=10090 GN=Jak2 PE=1 SV=2	54.98	Control_MRlabs	Control_MRlabs
Q91VC4	Plasmalemma vesicle-associated protein OS=Mus musculus OX=10090 GN=Plvap PE=1 SV=1	142.55	Control_MRlabs	Control_MRlabs
Q9CZT4	DNA-directed RNA polymerase III subunit RPC5 OS=Mus musculus OX=10090 GN=Polr3e PE=1 SV=2	41.21	Control_MRlabs	Control_MRlabs
P51906	Excitatory amino acid transporter 3 OS=Mus musculus OX=10090 GN=Slc1a1 PE=1 SV=2	98.01	Control_MRlabs	Control_MRlabs
Q8R1T1	Charged multivesicular body protein 7 OS=Mus musculus OX=10090 GN=Chmp7 PE=1 SV=1	48.85	Control_MRlabs	Control_MRlabs
Q6NXI6	Regulation of nuclear pre-mRNA domain-containing protein 2 OS=Mus musculus OX=10090 GN=Rprd2 PE=1 SV=1	83.11	Control_MRlabs	Control_MRlabs
Q91VB4	Hermansky-Pudlak syndrome 3 protein homolog OS=Mus musculus OX=10090 GN=Hps3 PE=2 SV=2	41.72	Control_MRlabs	Control_MRlabs
G5E872	Aminopeptidase RNPEPL1 OS=Mus musculus OX=10090 GN=Rnpepl1 PE=3 SV=2	74.12	Control_MRlabs	Control_MRlabs
Q8BI29	Specifically androgen-regulated gene protein OS=Mus musculus OX=10090 GN=Sarg PE=1 SV=2	2.21	Control_MRlabs	Control_MRlabs
Q8K1H9	Odorant-binding protein 2a OS=Mus musculus OX=10090 GN=Obp2a PE=2 SV=1	52.97	Control_MRlabs	Control_MRlabs
Q8R1S9	Sodium-coupled neutral amino acid transporter 4 OS=Mus musculus OX=10090 GN=Slc38a4 PE=1 SV=1	8.73	Control_MRlabs	Control_MRlabs
Q62108	Disks large homolog 4 OS=Mus musculus OX=10090 GN=Dlg4 PE=1 SV=1	29.85	Control_MRlabs	Control_MRlabs
Q8R1S4	Metastasis suppressor protein 1 OS=Mus musculus OX=10090 GN=Mtss1 PE=1 SV=1	101.97	Control_MRlabs	Control_MRlabs
Q9CZS1	Aldehyde dehydrogenase X, mitochondrial OS=Mus musculus OX=10090 GN=Aldh1b1 PE=1 SV=1	259.27	Control_MRlabs	Control_MRlabs
Q8BUJ9	Low-density lipoprotein receptor-related protein 12 OS=Mus musculus OX=10090 GN=Lrp12 PE=2 SV=2	38.77	Control_MRlabs	Control_MRlabs
Q8R242	Di-N-acetylchitobiase OS=Mus musculus OX=10090 GN=Ctbs PE=1 SV=2	24.95	Control_MRlabs	Control_MRlabs
Q62101	Serine/threonine-protein kinase D1 OS=Mus musculus OX=10090 GN=Prkd1 PE=1 SV=2	256.63	Control_MRlabs	Control_MRlabs
Q6NXH2	Glycoprotein endo-alpha-1,2-mannosidase OS=Mus musculus OX=10090 GN=Manea PE=2 SV=1	95.72	Control_MRlabs	Control_MRlabs
Q9EP82	tRNA (guanine-N(7)-)-methyltransferase non-catalytic subunit WDR4 OS=Mus musculus OX=10090 GN=Wdr4 PE=1 SV=2	71.52	Control_MRlabs	Control_MRlabs
Q8CCC3	Uncharacterized protein C12orf56 homolog OS=Mus musculus OX=10090 PE=2 SV=1	100.56	Control_MRlabs	Control_MRlabs
Q811W2	Cytochrome P450 26B1 OS=Mus musculus OX=10090 GN=Cyp26b1 PE=1 SV=1	47.81	Control_MRlabs	Control_MRlabs
Q9WTI7	Unconventional myosin-Ic OS=Mus musculus OX=10090 GN=Myo1c PE=1 SV=2	32.34	Control_MRlabs	Control_MRlabs
Q8R1R3	StAR-related lipid transfer protein 7, mitochondrial OS=Mus musculus OX=10090 GN=Stard7 PE=1 SV=2	61.62	Control_MRlabs	Control_MRlabs
Q9EP73	Programmed cell death 1 ligand 1 OS=Mus musculus OX=10090 GN=Cd274 PE=1 SV=1	63.02	Control_MRlabs	Control_MRlabs
Q3TWN3	Metal transporter CNNM2 OS=Mus musculus OX=10090 GN=Cnnm2 PE=1 SV=3	13.37	Control_MRlabs	Control_MRlabs
Q3UEG6	Alanine--glyoxylate aminotransferase 2, mitochondrial OS=Mus musculus OX=10090 GN=Agxt2 PE=1 SV=1	87.29	Control_MRlabs	Control_MRlabs
Q9R001	A disintegrin and metalloproteinase with thrombospondin motifs 5 OS=Mus musculus OX=10090 GN=Adamts5 PE=2 SV=2	14.45	Control_MRlabs	Control_MRlabs
Q8K1F9	Lactase-like protein OS=Mus musculus OX=10090 GN=Lctl PE=2 SV=1	46.35	Control_MRlabs	Control_MRlabs
A2RSQ0	DENN domain-containing protein 5B OS=Mus musculus OX=10090 GN=Dennd5b PE=1 SV=2	10.09	Control_MRlabs	Control_MRlabs
Q8R1Q3	Angiopoietin-related protein 7 OS=Mus musculus OX=10090 GN=Angptl7 PE=2 SV=1	1.25	Control_MRlabs	Control_MRlabs
A2AVJ5	Proline-rich protein 5-like OS=Mus musculus OX=10090 GN=Prr5l PE=1 SV=1	270.89	Control_MRlabs	Control_MRlabs
Q5IBH6	Speedy protein E4A OS=Mus musculus OX=10090 GN=Spdye4a PE=1 SV=1	137.77	Control_MRlabs	Control_MRlabs
O08795	Glucosidase 2 subunit beta OS=Mus musculus OX=10090 GN=Prkcsh PE=1 SV=1	148.11	Control_MRlabs	Control_MRlabs
Q9CZP5	Mitochondrial chaperone BCS1 OS=Mus musculus OX=10090 GN=Bcs1l PE=1 SV=1	77.51	Control_MRlabs	Control_MRlabs
Q63886	UDP-glucuronosyltransferase 1-1 OS=Mus musculus OX=10090 GN=Ugt1a1 PE=1 SV=2	20.62	Control_MRlabs	Control_MRlabs
Q9EP53	Hamartin OS=Mus musculus OX=10090 GN=Tsc1 PE=1 SV=1	45.37	Control_MRlabs	Control_MRlabs
Q3TWL2	Type 1 phosphatidylinositol 4,5-bisphosphate 4-phosphatase OS=Mus musculus OX=10090 GN=Pip4p1 PE=1 SV=1	56.56	Control_MRlabs	Control_MRlabs
P23475	X-ray repair cross-complementing protein 6 OS=Mus musculus OX=10090 GN=Xrcc6 PE=1 SV=5	8.36	Control_MRlabs	Control_MRlabs
O08788	Dynactin subunit 1 OS=Mus musculus OX=10090 GN=Dctn1 PE=1 SV=3	40.46	Control_MRlabs	Control_MRlabs
O08784	Treacle protein OS=Mus musculus OX=10090 GN=Tcof1 PE=1 SV=1	75.37	Control_MRlabs	Control_MRlabs
P35428	Transcription factor HES-1 OS=Mus musculus OX=10090 GN=Hes1 PE=1 SV=1	45.18	Control_MRlabs	Control_MRlabs
P33242	Steroidogenic factor 1 OS=Mus musculus OX=10090 GN=Nr5a1 PE=1 SV=3	17.65	Control_MRlabs	Control_MRlabs
Q3U8K7	Histone-lysine N-methyltransferase KMT5B OS=Mus musculus OX=10090 GN=Kmt5b PE=1 SV=2	123.65	Control_MRlabs	Control_MRlabs
G5E829	Plasma membrane calcium-transporting ATPase 1 OS=Mus musculus OX=10090 GN=Atp2b1 PE=1 SV=1	66.09	Control_MRlabs	Control_MRlabs
P15864	Histone H1.2 OS=Mus musculus OX=10090 GN=Hist1h1c PE=1 SV=2	97.34	Control_MRlabs	Control_MRlabs
P35419	Thyroid peroxidase OS=Mus musculus OX=10090 GN=Tpo PE=2 SV=1	45.05	Control_MRlabs	Control_MRlabs
Q8BHL5	Engulfment and cell motility protein 2 OS=Mus musculus OX=10090 GN=Elmo2 PE=1 SV=1	69.17	Control_MRlabs	Control_MRlabs
Q8K1C0	Protein angel homolog 2 OS=Mus musculus OX=10090 GN=Angel2 PE=1 SV=1	10.7	Control_MRlabs	Control_MRlabs
P27814	Killer cell lectin-like receptor subfamily B member 1C OS=Mus musculus OX=10090 GN=Klrb1c PE=1 SV=2	9.27	Control_MRlabs	Control_MRlabs
P27812	Killer cell lectin-like receptor subfamily B member 1B allele A OS=Mus musculus OX=10090 GN=Klrb1b PE=1 SV=1	199.42	Control_MRlabs	Control_MRlabs
Q8BUE4	Apoptosis-inducing factor 2 OS=Mus musculus OX=10090 GN=Aifm2 PE=1 SV=1	15.5	Control_MRlabs	Control_MRlabs
Q570Y9	DEP domain-containing mTOR-interacting protein OS=Mus musculus OX=10090 GN=Deptor PE=1 SV=2	172.82	Control_MRlabs	Control_MRlabs
P11499	Heat shock protein HSP 90-beta OS=Mus musculus OX=10090 GN=Hsp90ab1 PE=1 SV=3	49.56	Control_MRlabs	Control_MRlabs
Q8R1M0	Embryonic stem cell-specific 5-hydroxymethylcytosine-binding protein OS=Mus musculus OX=10090 GN=Hmces PE=1 SV=1	105.4	Control_MRlabs	Control_MRlabs
Q61670	H2.0-like homeobox protein OS=Mus musculus OX=10090 GN=Hlx PE=2 SV=1	93.4	Control_MRlabs	Control_MRlabs
Q811Q4	Disintegrin and metalloproteinase domain-containing protein 29 OS=Mus musculus OX=10090 GN=Adam29 PE=2 SV=1	106.12	Control_MRlabs	Control_MRlabs
P23440	Rod cGMP-specific 3',5'-cyclic phosphodiesterase subunit beta OS=Mus musculus OX=10090 GN=Pde6b PE=2 SV=3	226.43	Control_MRlabs	Control_MRlabs
Q8BHJ9	Pre-mRNA-splicing factor SLU7 OS=Mus musculus OX=10090 GN=Slu7 PE=1 SV=1	21.73	Control_MRlabs	Control_MRlabs
Q8BHJ7	Gamma-aminobutyric acid receptor subunit alpha-5 OS=Mus musculus OX=10090 GN=Gabra5 PE=1 SV=1	20.01	Control_MRlabs	Control_MRlabs
Q8BHJ6	Serine incorporator 5 OS=Mus musculus OX=10090 GN=Serinc5 PE=2 SV=1	72.24	Control_MRlabs	Control_MRlabs
Q63844	Mitogen-activated protein kinase 3 OS=Mus musculus OX=10090 GN=Mapk3 PE=1 SV=5	299.17	Control_MRlabs	Control_MRlabs
P46978	Dolichyl-diphosphooligosaccharide--protein glycosyltransferase subunit STT3A OS=Mus musculus OX=10090 GN=Stt3a PE=1 SV=1	9.14	Control_MRlabs	Control_MRlabs
Q1EG27	Myosin-IIIb OS=Mus musculus OX=10090 GN=Myo3b PE=1 SV=2	68.12	Control_MRlabs	Control_MRlabs
O08749	Dihydrolipoyl dehydrogenase, mitochondrial OS=Mus musculus OX=10090 GN=Dld PE=1 SV=2	181	Control_MRlabs	Control_MRlabs
Q9CZK6	Ankyrin repeat and SAM domain-containing protein 3 OS=Mus musculus OX=10090 GN=Anks3 PE=1 SV=2	42.7	Control_MRlabs	Control_MRlabs
Q99PV8	B-cell lymphoma/leukemia 11B OS=Mus musculus OX=10090 GN=Bcl11b PE=1 SV=1	90.95	Control_MRlabs	Control_MRlabs
O88398	Advillin OS=Mus musculus OX=10090 GN=Avil PE=1 SV=2	78	Control_MRlabs	Control_MRlabs
Q99PV5	Class E basic helix-loop-helix protein 41 OS=Mus musculus OX=10090 GN=Bhlhe41 PE=1 SV=1	50.94	Control_MRlabs	Control_MRlabs
O88396	GrpE protein homolog 2, mitochondrial OS=Mus musculus OX=10090 GN=Grpel2 PE=2 SV=2	26.8	Control_MRlabs	Control_MRlabs
Q8BUB6	Uronyl 2-sulfotransferase OS=Mus musculus OX=10090 GN=Ust PE=2 SV=3	21.19	Control_MRlabs	Control_MRlabs
Q91V95	Parathyroid hormone 2 receptor OS=Mus musculus OX=10090 GN=Pth2r PE=1 SV=1	17.63	Control_MRlabs	Control_MRlabs
Q91V93	Rho-related BTB domain-containing protein 2 OS=Mus musculus OX=10090 GN=Rhobtb2 PE=2 SV=2	19.82	Control_MRlabs	Control_MRlabs
Q61655	ATP-dependent RNA helicase DDX19A OS=Mus musculus OX=10090 GN=Ddx19a PE=1 SV=2	7.43	Control_MRlabs	Control_MRlabs
Q91V92	ATP-citrate synthase OS=Mus musculus OX=10090 GN=Acly PE=1 SV=1	123.48	Control_MRlabs	Control_MRlabs
Q99PU5	Long-chain-fatty-acid--CoA ligase ACSBG1 OS=Mus musculus OX=10090 GN=Acsbg1 PE=1 SV=1	27.63	Control_MRlabs	Control_MRlabs
O88384	Vesicle transport through interaction with t-SNAREs homolog 1B OS=Mus musculus OX=10090 GN=Vti1b PE=1 SV=1	10.04	Control_MRlabs	Control_MRlabs
Q91V88	Nephronectin OS=Mus musculus OX=10090 GN=Npnt PE=1 SV=1	35.48	Control_MRlabs	Control_MRlabs
Q3TWF6	WD repeat-containing protein 70 OS=Mus musculus OX=10090 GN=Wdr70 PE=1 SV=1	6.56	Control_MRlabs	Control_MRlabs
Q61645	Lysine-specific demethylase hairless OS=Mus musculus OX=10090 GN=Hr PE=2 SV=2	69.18	Control_MRlabs	Control_MRlabs
Q91V81	RNA-binding protein 42 OS=Mus musculus OX=10090 GN=Rbm42 PE=1 SV=1	310.53	Control_MRlabs	Control_MRlabs
O55060	Thiopurine S-methyltransferase OS=Mus musculus OX=10090 GN=Tpmt PE=1 SV=1	44.47	Control_MRlabs	Control_MRlabs
Q8CBY3	Leukocyte receptor cluster member 8 homolog OS=Mus musculus OX=10090 GN=Leng8 PE=1 SV=1	47.06	Control_MRlabs	Control_MRlabs
Q0VF94	NTPase KAP family P-loop domain-containing protein 1 OS=Mus musculus OX=10090 GN=Nkpd1 PE=2 SV=2	36.32	Control_MRlabs	Control_MRlabs
Q6R5N8	Toll-like receptor 13 OS=Mus musculus OX=10090 GN=Tlr13 PE=1 SV=1	2.3	Control_MRlabs	Control_MRlabs
Q99PT9	Kinesin-like protein KIF19 OS=Mus musculus OX=10090 GN=Kif19 PE=1 SV=2	56.12	Control_MRlabs	Control_MRlabs
Q8BHG1	Nardilysin OS=Mus musculus OX=10090 GN=Nrdc PE=1 SV=1	27.77	Control_MRlabs	Control_MRlabs
Q8CBX0	Calcium permeable stress-gated cation channel 1 OS=Mus musculus OX=10090 GN=Tmem63c PE=1 SV=1	19.45	Control_MRlabs	Control_MRlabs
Q8BHF7	CDP-diacylglycerol--glycerol-3-phosphate 3-phosphatidyltransferase, mitochondrial OS=Mus musculus OX=10090 GN=Pgs1 PE=1 SV=1	85.42	Control_MRlabs	Control_MRlabs
Q9CZH7	Matrix-remodeling-associated protein 7 OS=Mus musculus OX=10090 GN=Mxra7 PE=1 SV=2	191.25	Control_MRlabs	Control_MRlabs
Q3UQV5	Kelch repeat and BTB domain-containing protein 8 OS=Mus musculus OX=10090 GN=Kbtbd8 PE=2 SV=1	23.17	Control_MRlabs	Control_MRlabs
P56716	Oxygen-regulated protein 1 OS=Mus musculus OX=10090 GN=Rp1 PE=1 SV=2	39.36	Control_MRlabs	Control_MRlabs
O35493	Dual specificity protein kinase CLK4 OS=Mus musculus OX=10090 GN=Clk4 PE=1 SV=1	100.57	Control_MRlabs	Control_MRlabs
Q61626	Glutamate receptor ionotropic, kainate 5 OS=Mus musculus OX=10090 GN=Grik5 PE=2 SV=2	66.43	Control_MRlabs	Control_MRlabs
Q8CC88	von Willebrand factor A domain-containing protein 8 OS=Mus musculus OX=10090 GN=Vwa8 PE=1 SV=2	101.63	Control_MRlabs	Control_MRlabs
O55040	Neuromedin-U receptor 1 OS=Mus musculus OX=10090 GN=Nmur1 PE=2 SV=2	7.76	Control_MRlabs	Control_MRlabs
P46935	E3 ubiquitin-protein ligase NEDD4 OS=Mus musculus OX=10090 GN=Nedd4 PE=1 SV=3	17.11	Control_MRlabs	Control_MRlabs
A2AIG8	1-aminocyclopropane-1-carboxylate synthase-like protein 1 OS=Mus musculus OX=10090 GN=Accs PE=2 SV=1	14.13	Control_MRlabs	Control_MRlabs
Q8BHE5	Bone morphogenetic protein 3 OS=Mus musculus OX=10090 GN=Bmp3 PE=1 SV=1	36.55	Control_MRlabs	Control_MRlabs
Q8BHE0	Proline-rich protein 11 OS=Mus musculus OX=10090 GN=Prr11 PE=2 SV=1	77.78	Control_MRlabs	Control_MRlabs
O35488	Very long-chain acyl-CoA synthetase OS=Mus musculus OX=10090 GN=Slc27a2 PE=1 SV=2	96.22	Control_MRlabs	Control_MRlabs
Q8R1G1	Threonine aspartase 1 OS=Mus musculus OX=10090 GN=Tasp1 PE=2 SV=1	73.19	Control_MRlabs	Control_MRlabs
O35486	Beta-crystallin S OS=Mus musculus OX=10090 GN=Crygs PE=1 SV=3	42.14	Control_MRlabs	Control_MRlabs
Q91V57	N-chimaerin OS=Mus musculus OX=10090 GN=Chn1 PE=1 SV=2	49.64	Control_MRlabs	Control_MRlabs
Q3UQU0	Bromodomain-containing protein 9 OS=Mus musculus OX=10090 GN=Brd9 PE=1 SV=1	68.04	Control_MRlabs	Control_MRlabs
Q61618	Adenosine receptor A3 OS=Mus musculus OX=10090 GN=Adora3 PE=2 SV=2	213.18	Control_MRlabs	Control_MRlabs
Q8BHD7	Polypyrimidine tract-binding protein 3 OS=Mus musculus OX=10090 GN=Ptbp3 PE=1 SV=1	70.36	Control_MRlabs	Control_MRlabs
Q8BHD4	FERM domain-containing protein 3 OS=Mus musculus OX=10090 GN=Frmd3 PE=2 SV=1	7.92	Control_MRlabs	Control_MRlabs
P42567	Epidermal growth factor receptor substrate 15 OS=Mus musculus OX=10090 GN=Eps15 PE=1 SV=1	1.75	Control_MRlabs	Control_MRlabs
Q99PQ2	E3 ubiquitin-protein ligase TRIM11 OS=Mus musculus OX=10090 GN=Trim11 PE=1 SV=1	76.73	Control_MRlabs	Control_MRlabs
O88343	Electrogenic sodium bicarbonate cotransporter 1 OS=Mus musculus OX=10090 GN=Slc4a4 PE=1 SV=2	62.82	Control_MRlabs	Control_MRlabs
P34968	5-hydroxytryptamine receptor 2C OS=Mus musculus OX=10090 GN=Htr2c PE=2 SV=2	35.02	Control_MRlabs	Control_MRlabs
O55029	Coatomer subunit beta' OS=Mus musculus OX=10090 GN=Copb2 PE=1 SV=2	44.63	Control_MRlabs	Control_MRlabs
Q3UR50	von Willebrand factor A domain-containing protein 5B2 OS=Mus musculus OX=10090 GN=Vwa5b2 PE=2 SV=2	42.02	Control_MRlabs	Control_MRlabs
B1AX39	Zinc finger CCHC domain-containing protein 7 OS=Mus musculus OX=10090 GN=Zcchc7 PE=2 SV=1	77.17	Control_MRlabs	Control_MRlabs
Q61606	Glucagon receptor OS=Mus musculus OX=10090 GN=Gcgr PE=2 SV=2	43.35	Control_MRlabs	Control_MRlabs
Q61602	Transcriptional activator GLI3 OS=Mus musculus OX=10090 GN=Gli3 PE=1 SV=2	12.36	Control_MRlabs	Control_MRlabs
P52332	Tyrosine-protein kinase JAK1 OS=Mus musculus OX=10090 GN=Jak1 PE=1 SV=1	74.41	Control_MRlabs	Control_MRlabs
O88338	Cadherin-16 OS=Mus musculus OX=10090 GN=Cdh16 PE=1 SV=1	20.29	Control_MRlabs	Control_MRlabs
O35468	Protein Wnt-9b OS=Mus musculus OX=10090 GN=Wnt9b PE=2 SV=2	41.14	Control_MRlabs	Control_MRlabs
O35465	Peptidyl-prolyl cis-trans isomerase FKBP8 OS=Mus musculus OX=10090 GN=Fkbp8 PE=1 SV=2	16.44	Control_MRlabs	Control_MRlabs
Q91V36	Nuclear receptor-binding protein 2 OS=Mus musculus OX=10090 GN=Nrbp2 PE=1 SV=2	119.87	Control_MRlabs	Control_MRlabs
Q8BHB9	Chloride intracellular channel protein 6 OS=Mus musculus OX=10090 GN=Clic6 PE=1 SV=1	12.96	Control_MRlabs	Control_MRlabs
Q7TNV8	Beta-defensin 34 OS=Mus musculus OX=10090 GN=Defb34 PE=2 SV=1	71.58	Control_MRlabs	Control_MRlabs
Q8BHB7	Uncharacterized protein C16orf46 homolog OS=Mus musculus OX=10090 PE=2 SV=1	126.46	Control_MRlabs	Control_MRlabs
Q8BHB4	WD repeat-containing protein 3 OS=Mus musculus OX=10090 GN=Wdr3 PE=1 SV=1	19.33	Control_MRlabs	Control_MRlabs
Q9CZD5	Translation initiation factor IF-3, mitochondrial OS=Mus musculus OX=10090 GN=Mtif3 PE=1 SV=1	141.27	Control_MRlabs	Control_MRlabs
Q9QZZ6	Dermatopontin OS=Mus musculus OX=10090 GN=Dpt PE=1 SV=1	123.32	Control_MRlabs	Control_MRlabs
O88329	Unconventional myosin-Ia OS=Mus musculus OX=10090 GN=Myo1a PE=2 SV=2	23.43	Control_MRlabs	Control_MRlabs
Q8BHB0	Nucleotide-binding oligomerization domain-containing protein 1 OS=Mus musculus OX=10090 GN=Nod1 PE=1 SV=1	10.52	Control_MRlabs	Control_MRlabs
Q8R1D1	Zinc finger protein 426 OS=Mus musculus OX=10090 GN=Znf426 PE=2 SV=1	25.83	Control_MRlabs	Control_MRlabs
O35454	Chloride transport protein 6 OS=Mus musculus OX=10090 GN=Clcn6 PE=1 SV=1	28	Control_MRlabs	Control_MRlabs
Q8BTZ4	Anaphase-promoting complex subunit 5 OS=Mus musculus OX=10090 GN=Anapc5 PE=1 SV=1	55.42	Control_MRlabs	Control_MRlabs
Q3V2Q8	NEDD4-binding protein 2-like 1 OS=Mus musculus OX=10090 GN=N4bp2l1 PE=2 SV=1	32.6	Control_MRlabs	Control_MRlabs
O35448	Lysosomal thioesterase PPT2 OS=Mus musculus OX=10090 GN=Ppt2 PE=1 SV=1	50.89	Control_MRlabs	Control_MRlabs
Q99PN3	Tripartite motif-containing protein 26 OS=Mus musculus OX=10090 GN=Trim26 PE=2 SV=3	32.21	Control_MRlabs	Control_MRlabs
Q8BTY8	Sec1 family domain-containing protein 2 OS=Mus musculus OX=10090 GN=Scfd2 PE=1 SV=1	72.79	Control_MRlabs	Control_MRlabs
Q8R1C0	Potassium voltage-gated channel subfamily C member 4 OS=Mus musculus OX=10090 GN=Kcnc4 PE=2 SV=1	134.71	Control_MRlabs	Control_MRlabs
Q91V17	E3 ubiquitin-protein ligase ZNRF1 OS=Mus musculus OX=10090 GN=Znrf1 PE=1 SV=1	11.75	Control_MRlabs	Control_MRlabs
Q6NWW5	Kinesin-like protein KIF24 OS=Mus musculus OX=10090 GN=Kif24 PE=1 SV=2	58.93	Control_MRlabs	Control_MRlabs
Q8BTY2	Sodium bicarbonate cotransporter 3 OS=Mus musculus OX=10090 GN=Slc4a7 PE=1 SV=2	130.95	Control_MRlabs	Control_MRlabs
Q91V14	Solute carrier family 12 member 5 OS=Mus musculus OX=10090 GN=Slc12a5 PE=1 SV=2	18.13	Control_MRlabs	Control_MRlabs
Q91V12	Cytosolic acyl coenzyme A thioester hydrolase OS=Mus musculus OX=10090 GN=Acot7 PE=1 SV=2	27.87	Control_MRlabs	Control_MRlabs
Q8CBR1	Immunoglobulin-like domain-containing receptor 1 OS=Mus musculus OX=10090 GN=Ildr1 PE=1 SV=2	113.03	Control_MRlabs	Control_MRlabs
Q8R1B4	Eukaryotic translation initiation factor 3 subunit C OS=Mus musculus OX=10090 GN=Eif3c PE=1 SV=1	39.01	Control_MRlabs	Control_MRlabs
Q1RLL3	Copine-9 OS=Mus musculus OX=10090 GN=Cpne9 PE=1 SV=1	37.27	Control_MRlabs	Control_MRlabs
Q8R1B0	SH3 and cysteine-rich domain-containing protein 2 OS=Mus musculus OX=10090 GN=Stac2 PE=1 SV=1	6.61	Control_MRlabs	Control_MRlabs
Q8CBQ5	Phosphatidylinositol 4-kinase type 2-beta OS=Mus musculus OX=10090 GN=Pi4k2b PE=1 SV=1	24.33	Control_MRlabs	Control_MRlabs
Q3TJD7	PDZ and LIM domain protein 7 OS=Mus musculus OX=10090 GN=Pdlim7 PE=1 SV=1	5.88	Control_MRlabs	Control_MRlabs
Q8K0U4	Heat shock 70 kDa protein 12A OS=Mus musculus OX=10090 GN=Hspa12a PE=1 SV=1	44.12	Control_MRlabs	Control_MRlabs
Q1RLK6	N-acetyllactosaminide beta-1,3-N-acetylglucosaminyltransferase 4 OS=Mus musculus OX=10090 GN=B3gnt4 PE=2 SV=2	49.75	Control_MRlabs	Control_MRlabs
Q6KAS7	Zinc finger protein 521 OS=Mus musculus OX=10090 GN=Znf521 PE=1 SV=2	18.63	Control_MRlabs	Control_MRlabs
Q9QZW0	Phospholipid-transporting ATPase 11C OS=Mus musculus OX=10090 GN=Atp11c PE=1 SV=2	20.17	Control_MRlabs	Control_MRlabs
P20782	Acetylcholine receptor subunit epsilon OS=Mus musculus OX=10090 GN=Chrne PE=2 SV=1	0.43	Control_MRlabs	Control_MRlabs
P40336	Vacuolar protein sorting-associated protein 26A OS=Mus musculus OX=10090 GN=Vps26a PE=1 SV=1	39.37	Control_MRlabs	Control_MRlabs
Q8CC12	Codanin-1 OS=Mus musculus OX=10090 GN=Cdan1 PE=1 SV=2	41.56	Control_MRlabs	Control_MRlabs
Q04207	Transcription factor p65 OS=Mus musculus OX=10090 GN=Rela PE=1 SV=1	184.01	Control_MRlabs	Control_MRlabs
Q8K158	Protein CNPPD1 OS=Mus musculus OX=10090 GN=Cnppd1 PE=2 SV=1	80.28	Control_MRlabs	Control_MRlabs
Q8C5V8	Coiled-coil domain-containing protein 187 OS=Mus musculus OX=10090 GN=Ccdc187 PE=2 SV=1	30.06	Control_MRlabs	Control_MRlabs
Q52KP5	NXPE family member 4 OS=Mus musculus OX=10090 GN=Nxpe4 PE=2 SV=1	164.03	Control_MRlabs	Control_MRlabs
Q3UQN2	F-BAR domain only protein 2 OS=Mus musculus OX=10090 GN=Fcho2 PE=1 SV=1	74.24	Control_MRlabs	Control_MRlabs
Q8C5V5	WD repeat-containing protein 27 OS=Mus musculus OX=10090 GN=Wdr27 PE=2 SV=2	68.05	Control_MRlabs	Control_MRlabs
P16294	Coagulation factor IX OS=Mus musculus OX=10090 GN=F9 PE=2 SV=3	95.55	Control_MRlabs	Control_MRlabs
P30549	Substance-K receptor OS=Mus musculus OX=10090 GN=Tacr2 PE=2 SV=1	332.53	Control_MRlabs	Control_MRlabs
Q8C5U9	Ubiquilin-3 OS=Mus musculus OX=10090 GN=Ubqln3 PE=1 SV=1	53.48	Control_MRlabs	Control_MRlabs
Q99PJ1	Protocadherin-15 OS=Mus musculus OX=10090 GN=Pcdh15 PE=1 SV=3	48.86	Control_MRlabs	Control_MRlabs
Q0V8T7	Contactin-associated protein like 5-3 OS=Mus musculus OX=10090 GN=Cntnap5c PE=2 SV=1	114.05	Control_MRlabs	Control_MRlabs
P16283	Anion exchange protein 3 OS=Mus musculus OX=10090 GN=Slc4a3 PE=1 SV=2	25.04	Control_MRlabs	Control_MRlabs
Q811C2	Cysteine protease ATG4C OS=Mus musculus OX=10090 GN=Atg4c PE=1 SV=2	42.05	Control_MRlabs	Control_MRlabs
Q8K136	Sodium channel modifier 1 OS=Mus musculus OX=10090 GN=Scnm1 PE=1 SV=1	70.78	Control_MRlabs	Control_MRlabs
Q64282	Interferon-induced protein with tetratricopeptide repeats 1 OS=Mus musculus OX=10090 GN=Ifit1 PE=1 SV=2	64.97	Control_MRlabs	Control_MRlabs
Q99PI4	Phosphatidate phosphatase LPIN3 OS=Mus musculus OX=10090 GN=Lpin3 PE=1 SV=1	60.41	Control_MRlabs	Control_MRlabs
Q811B3	A disintegrin and metalloproteinase with thrombospondin motifs 12 OS=Mus musculus OX=10090 GN=Adamts12 PE=2 SV=2	39.19	Control_MRlabs	Control_MRlabs
Q8BGZ4	Cell division cycle protein 23 homolog OS=Mus musculus OX=10090 GN=Cdc23 PE=1 SV=2	89.61	Control_MRlabs	Control_MRlabs
Q8K0Q5	Rho GTPase-activating protein 18 OS=Mus musculus OX=10090 GN=Arhgap18 PE=1 SV=1	26.21	Control_MRlabs	Control_MRlabs
P51885	Lumican OS=Mus musculus OX=10090 GN=Lum PE=1 SV=2	53.6	Control_MRlabs	Control_MRlabs
Q9QZS0	Collagen alpha-3(IV) chain OS=Mus musculus OX=10090 GN=Col4a3 PE=1 SV=2	50.38	Control_MRlabs	Control_MRlabs
Q8BTS4	Nuclear pore complex protein Nup54 OS=Mus musculus OX=10090 GN=Nup54 PE=1 SV=1	51.38	Control_MRlabs	Control_MRlabs
O09173	Homogentisate 1,2-dioxygenase OS=Mus musculus OX=10090 GN=Hgd PE=1 SV=2	23.73	Control_MRlabs	Control_MRlabs
Q8BGY6	Lactosylceramide 1,3-N-acetyl-beta-D-glucosaminyltransferase OS=Mus musculus OX=10090 GN=B3gnt5 PE=2 SV=1	15.95	Control_MRlabs	Control_MRlabs
Q9QZR9	Collagen alpha-4(IV) chain OS=Mus musculus OX=10090 GN=Col4a4 PE=2 SV=1	47.19	Control_MRlabs	Control_MRlabs
Q64264	5-hydroxytryptamine receptor 1A OS=Mus musculus OX=10090 GN=Htr1a PE=2 SV=2	209.04	Control_MRlabs	Control_MRlabs
Q99PG2	Opioid growth factor receptor OS=Mus musculus OX=10090 GN=Ogfr PE=1 SV=1	45.67	Control_MRlabs	Control_MRlabs
Q62083	PRKCA-binding protein OS=Mus musculus OX=10090 GN=Pick1 PE=1 SV=2	280.72	Control_MRlabs	Control_MRlabs
Q8C636	Spermatogenesis-associated protein 16 OS=Mus musculus OX=10090 GN=Spata16 PE=2 SV=1	12.39	Control_MRlabs	Control_MRlabs
Q3TVW5	Trichoplein keratin filament-binding protein OS=Mus musculus OX=10090 GN=Tchp PE=1 SV=2	67.11	Control_MRlabs	Control_MRlabs
P16254	Signal recognition particle 14 kDa protein OS=Mus musculus OX=10090 GN=Srp14 PE=1 SV=1	2.04	Control_MRlabs	Control_MRlabs
Q5U430	E3 ubiquitin-protein ligase UBR3 OS=Mus musculus OX=10090 GN=Ubr3 PE=1 SV=3	29.7	Control_MRlabs	Control_MRlabs
Q8BGX7	DNA repair-scaffolding protein OS=Mus musculus OX=10090 GN=Spidr PE=2 SV=1	113.88	Control_MRlabs	Control_MRlabs
Q8BH95	Enoyl-CoA hydratase, mitochondrial OS=Mus musculus OX=10090 GN=Echs1 PE=1 SV=1	23.6	Control_MRlabs	Control_MRlabs
Q3UDP0	WD repeat-containing protein 41 OS=Mus musculus OX=10090 GN=Wdr41 PE=1 SV=1	22.57	Control_MRlabs	Control_MRlabs
P51865	Teratocarcinoma-derived growth factor OS=Mus musculus OX=10090 GN=Tdgf1 PE=1 SV=1	186.49	Control_MRlabs	Control_MRlabs
Q8R0Z2	Ecto-NOX disulfide-thiol exchanger 2 OS=Mus musculus OX=10090 GN=Enox2 PE=2 SV=1	5.77	Control_MRlabs	Control_MRlabs
Q62074	Protein kinase C iota type OS=Mus musculus OX=10090 GN=Prkci PE=1 SV=3	122.56	Control_MRlabs	Control_MRlabs
Q9QZQ0	Neuronal PAS domain-containing protein 3 OS=Mus musculus OX=10090 GN=Npas3 PE=1 SV=1	53.71	Control_MRlabs	Control_MRlabs
P51860	Nucleosome assembly protein 1-like 2 OS=Mus musculus OX=10090 GN=Nap1l2 PE=1 SV=2	104.94	Control_MRlabs	Control_MRlabs
Q62073	Mitogen-activated protein kinase kinase kinase 7 OS=Mus musculus OX=10090 GN=Map3k7 PE=1 SV=1	96.69	Control_MRlabs	Control_MRlabs
Q8C627	Protein FAM221B OS=Mus musculus OX=10090 GN=Fam221b PE=2 SV=1	106.16	Control_MRlabs	Control_MRlabs
Q8BU25	Inactive serine protease PAMR1 OS=Mus musculus OX=10090 GN=Pamr1 PE=2 SV=3	20.09	Control_MRlabs	Control_MRlabs
P98078	Disabled homolog 2 OS=Mus musculus OX=10090 GN=Dab2 PE=1 SV=2	104	Control_MRlabs	Control_MRlabs
O09159	Lysosomal alpha-mannosidase OS=Mus musculus OX=10090 GN=Man2b1 PE=1 SV=4	19.42	Control_MRlabs	Control_MRlabs
A2RRY8	Spermatogenesis-associated serine-rich protein 1 OS=Mus musculus OX=10090 GN=Spats1 PE=1 SV=1	4.65	Control_MRlabs	Control_MRlabs
Q8BH88	DEP domain-containing protein 1B OS=Mus musculus OX=10090 GN=Depdc1b PE=2 SV=1	2.55	Control_MRlabs	Control_MRlabs
Q8BGW6	Serine/threonine-protein kinase 32A OS=Mus musculus OX=10090 GN=Stk32a PE=2 SV=1	0.88	Control_MRlabs	Control_MRlabs
Q7TNL3	Serine/threonine-protein kinase 40 OS=Mus musculus OX=10090 GN=Stk40 PE=1 SV=1	5.03	Control_MRlabs	Control_MRlabs
Q99PE8	ATP-binding cassette sub-family G member 5 OS=Mus musculus OX=10090 GN=Abcg5 PE=1 SV=1	85.41	Control_MRlabs	Control_MRlabs
P51855	Glutathione synthetase OS=Mus musculus OX=10090 GN=Gss PE=1 SV=1	311.98	Control_MRlabs	Control_MRlabs
Q6P3A4	V-set and immunoglobulin domain-containing protein 8 OS=Mus musculus OX=10090 GN=Vsig8 PE=2 SV=2	51.35	Control_MRlabs	Control_MRlabs
Q62066	Paired mesoderm homeobox protein 2A OS=Mus musculus OX=10090 GN=Phox2a PE=2 SV=1	96.66	Control_MRlabs	Control_MRlabs
P26011	Integrin beta-7 OS=Mus musculus OX=10090 GN=Itgb7 PE=1 SV=2	85.61	Control_MRlabs	Control_MRlabs
Q8BU14	Translocation protein SEC62 OS=Mus musculus OX=10090 GN=Sec62 PE=1 SV=1	6.83	Control_MRlabs	Control_MRlabs
P98063	Bone morphogenetic protein 1 OS=Mus musculus OX=10090 GN=Bmp1 PE=1 SV=2	138.67	Control_MRlabs	Control_MRlabs
Q8BH79	Anoctamin-10 OS=Mus musculus OX=10090 GN=Ano10 PE=1 SV=1	28.84	Control_MRlabs	Control_MRlabs
Q8BGV9	Cysteine protease ATG4D OS=Mus musculus OX=10090 GN=Atg4d PE=1 SV=1	59.58	Control_MRlabs	Control_MRlabs
Q9JMK0	Beta-1,4-galactosyltransferase 5 OS=Mus musculus OX=10090 GN=B4galt5 PE=2 SV=2	12.22	Control_MRlabs	Control_MRlabs
Q8BGV7	BTB/POZ domain-containing adapter for CUL3-mediated RhoA degradation protein 1 OS=Mus musculus OX=10090 GN=Kctd13 PE=2 SV=1	129.21	Control_MRlabs	Control_MRlabs
Q8BGV4	TELO2-interacting protein 2 OS=Mus musculus OX=10090 GN=Tti2 PE=2 SV=1	53.35	Control_MRlabs	Control_MRlabs
Q8R0X7	Sphingosine-1-phosphate lyase 1 OS=Mus musculus OX=10090 GN=Sgpl1 PE=1 SV=1	5.93	Control_MRlabs	Control_MRlabs
Q8BU04	Putative E3 ubiquitin-protein ligase UBR7 OS=Mus musculus OX=10090 GN=Ubr7 PE=1 SV=1	134.25	Control_MRlabs	Control_MRlabs
Q8BU03	Periodic tryptophan protein 2 homolog OS=Mus musculus OX=10090 GN=Pwp2 PE=1 SV=1	53.85	Control_MRlabs	Control_MRlabs
P10925	Zinc finger Y-chromosomal protein 1 OS=Mus musculus OX=10090 GN=Zfy1 PE=2 SV=3	59.16	Control_MRlabs	Control_MRlabs
Q8CBH7	E3 ubiquitin-protein ligase MARCH11 OS=Mus musculus OX=10090 GN=March11 PE=2 SV=2	12.38	Control_MRlabs	Control_MRlabs
P10922	Histone H1.0 OS=Mus musculus OX=10090 GN=H1f0 PE=2 SV=4	58.09	Control_MRlabs	Control_MRlabs
Q5U405	Transmembrane protease serine 13 OS=Mus musculus OX=10090 GN=Tmprss13 PE=2 SV=2	35.38	Control_MRlabs	Control_MRlabs
Q8BH65	Protein DENND6A OS=Mus musculus OX=10090 GN=Dennd6a PE=1 SV=1	66.13	Control_MRlabs	Control_MRlabs
Q38HM4	E3 ubiquitin-protein ligase TRIM63 OS=Mus musculus OX=10090 GN=Trim63 PE=1 SV=1	22.48	Control_MRlabs	Control_MRlabs
Q62048	Astrocytic phosphoprotein PEA-15 OS=Mus musculus OX=10090 GN=Pea15 PE=1 SV=1	59.68	Control_MRlabs	Control_MRlabs
Q9QZN0	F-box only protein 15 OS=Mus musculus OX=10090 GN=Fbxo15 PE=1 SV=2	123.79	Control_MRlabs	Control_MRlabs
P02089	Hemoglobin subunit beta-2 OS=Mus musculus OX=10090 GN=Hbb-b2 PE=1 SV=2	42.22	Control_MRlabs	Control_MRlabs
P51830	Adenylate cyclase type 9 OS=Mus musculus OX=10090 GN=Adcy9 PE=1 SV=1	44.04	Control_MRlabs	Control_MRlabs
Q8C5N5	Programmed cell death protein 2-like OS=Mus musculus OX=10090 GN=Pdcd2l PE=1 SV=1	33.18	Control_MRlabs	Control_MRlabs
O09127	Ephrin type-A receptor 8 OS=Mus musculus OX=10090 GN=Epha8 PE=1 SV=2	79.75	Control_MRlabs	Control_MRlabs
O09126	Semaphorin-4D OS=Mus musculus OX=10090 GN=Sema4d PE=1 SV=2	6.86	Control_MRlabs	Control_MRlabs
P0CG14	Chromosome transmission fidelity protein 8 homolog isoform 2 OS=Mus musculus OX=10090 GN=Chtf8 PE=1 SV=1	110.19	Control_MRlabs	Control_MRlabs
Q8BGT9	Polypeptide N-acetylgalactosaminyltransferase 12 OS=Mus musculus OX=10090 GN=Galnt12 PE=2 SV=1	83.86	Control_MRlabs	Control_MRlabs
Q9JMI0	Endothelin-converting enzyme-like 1 OS=Mus musculus OX=10090 GN=Ecel1 PE=2 SV=2	81.79	Control_MRlabs	Control_MRlabs
Q8BH58	TIP41-like protein OS=Mus musculus OX=10090 GN=Tiprl PE=1 SV=1	53.17	Control_MRlabs	Control_MRlabs
P51829	Adenylate cyclase type 7 OS=Mus musculus OX=10090 GN=Adcy7 PE=2 SV=2	28.51	Control_MRlabs	Control_MRlabs
Q9CYV5	Transmembrane protein 135 OS=Mus musculus OX=10090 GN=Tmem135 PE=2 SV=1	66.3	Control_MRlabs	Control_MRlabs
P51827	AF4/FMR2 family member 3 OS=Mus musculus OX=10090 GN=Aff3 PE=1 SV=2	59.93	Control_MRlabs	Control_MRlabs
Q8BGT1	Leucine-rich repeat transmembrane protein FLRT3 OS=Mus musculus OX=10090 GN=Flrt3 PE=1 SV=1	74.73	Control_MRlabs	Control_MRlabs
Q9QZM4	Tumor necrosis factor receptor superfamily member 10B OS=Mus musculus OX=10090 GN=Tnfrsf10b PE=2 SV=3	82.82	Control_MRlabs	Control_MRlabs
Q05921	2-5A-dependent ribonuclease OS=Mus musculus OX=10090 GN=Rnasel PE=1 SV=2	49.38	Control_MRlabs	Control_MRlabs
Q8BGT0	Osteopetrosis-associated transmembrane protein 1 OS=Mus musculus OX=10090 GN=Ostm1 PE=1 SV=1	45.55	Control_MRlabs	Control_MRlabs
Q62036	Centrosomal protein of 131 kDa OS=Mus musculus OX=10090 GN=Cep131 PE=1 SV=2	31.58	Control_MRlabs	Control_MRlabs
P0CG09	C2 calcium-dependent domain-containing protein 4D OS=Mus musculus OX=10090 GN=C2cd4d PE=4 SV=1	164.47	Control_MRlabs	Control_MRlabs
Q9JMH9	Unconventional myosin-XVIIIa OS=Mus musculus OX=10090 GN=Myo18a PE=1 SV=2	111.81	Control_MRlabs	Control_MRlabs
O09118	Netrin-1 OS=Mus musculus OX=10090 GN=Ntn1 PE=1 SV=3	71.92	Control_MRlabs	Control_MRlabs
Q3U7R1	Extended synaptotagmin-1 OS=Mus musculus OX=10090 GN=Esyt1 PE=1 SV=2	51.66	Control_MRlabs	Control_MRlabs
Q8CBF3	Ephrin type-B receptor 1 OS=Mus musculus OX=10090 GN=Ephb1 PE=1 SV=1	13.67	Control_MRlabs	Control_MRlabs
Q3TIX9	U4/U6.U5 tri-snRNP-associated protein 2 OS=Mus musculus OX=10090 GN=Usp39 PE=1 SV=2	3.1	Control_MRlabs	Control_MRlabs
Q62028	Secretory phospholipase A2 receptor OS=Mus musculus OX=10090 GN=Pla2r1 PE=1 SV=1	55.01	Control_MRlabs	Control_MRlabs
Q8BGS1	Band 4.1-like protein 5 OS=Mus musculus OX=10090 GN=Epb41l5 PE=1 SV=1	34.2	Control_MRlabs	Control_MRlabs
Q810Y8	Preferentially expressed antigen in melanoma-like protein 7 OS=Mus musculus OX=10090 GN=Pramel7 PE=1 SV=1	25.39	Control_MRlabs	Control_MRlabs
O09105	Neurogenic differentiation factor 4 OS=Mus musculus OX=10090 GN=Neurod4 PE=1 SV=1	74.02	Control_MRlabs	Control_MRlabs
B2RRF6	Zinc finger protein 518A OS=Mus musculus OX=10090 GN=Znf518a PE=2 SV=1	97.05	Control_MRlabs	Control_MRlabs
Q8BH35	Complement component C8 beta chain OS=Mus musculus OX=10090 GN=C8b PE=1 SV=1	124.59	Control_MRlabs	Control_MRlabs
Q5M8N4	Epimerase family protein SDR39U1 OS=Mus musculus OX=10090 GN=Sdr39u1 PE=1 SV=1	44.28	Control_MRlabs	Control_MRlabs
P35375	Prostaglandin E2 receptor EP1 subtype OS=Mus musculus OX=10090 GN=Ptger1 PE=2 SV=1	80.7	Control_MRlabs	Control_MRlabs
Q9QZK2	Breast cancer anti-estrogen resistance protein 3 OS=Mus musculus OX=10090 GN=Bcar3 PE=1 SV=1	46.42	Control_MRlabs	Control_MRlabs
Q8R0T2	Zinc finger protein 768 OS=Mus musculus OX=10090 GN=Znf768 PE=1 SV=1	45.07	Control_MRlabs	Control_MRlabs
B2RRE7	OTU domain-containing protein 4 OS=Mus musculus OX=10090 GN=Otud4 PE=1 SV=1	23.33	Control_MRlabs	Control_MRlabs
B2RRE4	Zinc finger protein 518B OS=Mus musculus OX=10090 GN=Znf518b PE=2 SV=1	71.87	Control_MRlabs	Control_MRlabs
Q6Y5D8	Rho GTPase-activating protein 10 OS=Mus musculus OX=10090 GN=Arhgap10 PE=1 SV=2	76.13	Control_MRlabs	Control_MRlabs
Q7TNF9	Protein FAM117A OS=Mus musculus OX=10090 GN=Fam117a PE=1 SV=1	34.35	Control_MRlabs	Control_MRlabs
Q7TNF8	Peripheral-type benzodiazepine receptor-associated protein 1 OS=Mus musculus OX=10090 GN=Tspoap1 PE=2 SV=2	136.68	Control_MRlabs	Control_MRlabs
Q8BH27	Multiple epidermal growth factor-like domains protein 9 OS=Mus musculus OX=10090 GN=Megf9 PE=2 SV=1	27.89	Control_MRlabs	Control_MRlabs
Q8R149	BUD13 homolog OS=Mus musculus OX=10090 GN=Bud13 PE=1 SV=1	51.13	Control_MRlabs	Control_MRlabs
Q8K0H7	Solute carrier family 45 member 3 OS=Mus musculus OX=10090 GN=Slc45a3 PE=2 SV=1	47.95	Control_MRlabs	Control_MRlabs
Q62009	Periostin OS=Mus musculus OX=10090 GN=Postn PE=1 SV=2	49	Control_MRlabs	Control_MRlabs
Q8R0S6	WAP, Kazal, immunoglobulin, Kunitz and NTR domain-containing protein 1 OS=Mus musculus OX=10090 GN=Wfikkn1 PE=2 SV=2	110.74	Control_MRlabs	Control_MRlabs
Q8R146	Acylamino-acid-releasing enzyme OS=Mus musculus OX=10090 GN=Apeh PE=1 SV=3	92.28	Control_MRlabs	Control_MRlabs
Q03719	Potassium voltage-gated channel subfamily D member 1 OS=Mus musculus OX=10090 GN=Kcnd1 PE=1 SV=1	39.42	Control_MRlabs	Control_MRlabs
Q8BGQ1	Spermatogenesis-defective protein 39 homolog OS=Mus musculus OX=10090 GN=Vipas39 PE=1 SV=1	24.2	Control_MRlabs	Control_MRlabs
P35363	5-hydroxytryptamine receptor 2A OS=Mus musculus OX=10090 GN=Htr2a PE=1 SV=1	77.05	Control_MRlabs	Control_MRlabs
Q8K0H1	Multidrug and toxin extrusion protein 1 OS=Mus musculus OX=10090 GN=Slc47a1 PE=1 SV=2	411.83	Control_MRlabs	Control_MRlabs
Q6W3F0	Prolyl 4-hydroxylase subunit alpha-3 OS=Mus musculus OX=10090 GN=P4ha3 PE=2 SV=1	0.33	Control_MRlabs	Control_MRlabs
B2RRD7	Peregrin OS=Mus musculus OX=10090 GN=Brpf1 PE=1 SV=1	70.99	Control_MRlabs	Control_MRlabs
Q8CBC4	Consortin OS=Mus musculus OX=10090 GN=Cnst PE=1 SV=1	101.03	Control_MRlabs	Control_MRlabs
Q9JME2	Carbohydrate sulfotransferase 11 OS=Mus musculus OX=10090 GN=Chst11 PE=2 SV=1	10.52	Control_MRlabs	Control_MRlabs
Q8BH15	CCR4-NOT transcription complex subunit 10 OS=Mus musculus OX=10090 GN=Cnot10 PE=1 SV=1	138.78	Control_MRlabs	Control_MRlabs
Q9CYR6	Phosphoacetylglucosamine mutase OS=Mus musculus OX=10090 GN=Pgm3 PE=1 SV=1	36.88	Control_MRlabs	Control_MRlabs
Q6UJY2	Sodium/hydrogen exchanger 10 OS=Mus musculus OX=10090 GN=Slc9c1 PE=1 SV=3	73.78	Control_MRlabs	Control_MRlabs
Q8BTI7	Serine/threonine-protein phosphatase 6 regulatory ankyrin repeat subunit C OS=Mus musculus OX=10090 GN=Ankrd52 PE=1 SV=1	32.19	Control_MRlabs	Control_MRlabs
P33174	Chromosome-associated kinesin KIF4 OS=Mus musculus OX=10090 GN=Kif4 PE=1 SV=3	35.22	Control_MRlabs	Control_MRlabs
P33173	Kinesin-like protein KIF1A OS=Mus musculus OX=10090 GN=Kif1a PE=1 SV=2	43.07	Control_MRlabs	Control_MRlabs
Q9JMD1	Scm-like with four MBT domains protein 1 OS=Mus musculus OX=10090 GN=Sfmbt1 PE=1 SV=1	55.25	Control_MRlabs	Control_MRlabs
Q8BH06	Interleukin-17 receptor E OS=Mus musculus OX=10090 GN=Il17re PE=1 SV=1	102.67	Control_MRlabs	Control_MRlabs
Q641K5	NUAK family SNF1-like kinase 1 OS=Mus musculus OX=10090 GN=Nuak1 PE=1 SV=1	32.25	Control_MRlabs	Control_MRlabs
Q641K1	Cytosolic carboxypeptidase 1 OS=Mus musculus OX=10090 GN=Agtpbp1 PE=1 SV=2	13.29	Control_MRlabs	Control_MRlabs
Q8BH01	Transmembrane and coiled-coil domain-containing protein 3 OS=Mus musculus OX=10090 GN=Tmco3 PE=2 SV=1	118.27	Control_MRlabs	Control_MRlabs
Q8BH00	Aldehyde dehydrogenase family 8 member A1 OS=Mus musculus OX=10090 GN=Aldh8a1 PE=1 SV=1	20.1	Control_MRlabs	Control_MRlabs
Q8R121	Protein Z-dependent protease inhibitor OS=Mus musculus OX=10090 GN=Serpina10 PE=1 SV=1	64.1	Control_MRlabs	Control_MRlabs
E9PYY5	WD repeat-containing protein 78 OS=Mus musculus OX=10090 GN=Wdr78 PE=1 SV=1	76.26	Control_MRlabs	Control_MRlabs
Q8CBA2	Schlafen family member 5 OS=Mus musculus OX=10090 GN=Slfn5 PE=1 SV=2	152.21	Control_MRlabs	Control_MRlabs
Q7TNC6	Kinesin-like protein KIF26B OS=Mus musculus OX=10090 GN=Kif26b PE=1 SV=3	52	Control_MRlabs	Control_MRlabs
P35330	Intercellular adhesion molecule 2 OS=Mus musculus OX=10090 GN=Icam2 PE=1 SV=1	41.01	Control_MRlabs	Control_MRlabs
Q9JMB8	Contactin-6 OS=Mus musculus OX=10090 GN=Cntn6 PE=1 SV=2	2.8	Control_MRlabs	Control_MRlabs
Q810T2	G2/mitotic-specific cyclin-B3 OS=Mus musculus OX=10090 GN=Ccnb3 PE=1 SV=2	81.23	Control_MRlabs	Control_MRlabs
Q9JMB0	G kinase-anchoring protein 1 OS=Mus musculus OX=10090 GN=Gkap1 PE=1 SV=1	58.4	Control_MRlabs	Control_MRlabs
Q7TNB8	Protein strawberry notch homolog 2 OS=Mus musculus OX=10090 GN=Sbno2 PE=1 SV=1	76.21	Control_MRlabs	Control_MRlabs
P35329	B-cell receptor CD22 OS=Mus musculus OX=10090 GN=Cd22 PE=1 SV=1	92	Control_MRlabs	Control_MRlabs
A2AI05	NADPH-dependent diflavin oxidoreductase 1 OS=Mus musculus OX=10090 GN=Ndor1 PE=2 SV=1	84.34	Control_MRlabs	Control_MRlabs
Q4JK59	Methylcytosine dioxygenase TET2 OS=Mus musculus OX=10090 GN=Tet2 PE=1 SV=3	53.73	Control_MRlabs	Control_MRlabs
Q61598	Rab GDP dissociation inhibitor beta OS=Mus musculus OX=10090 GN=Gdi2 PE=1 SV=1	77.86	Control_MRlabs	Control_MRlabs
Q61595	Kinectin OS=Mus musculus OX=10090 GN=Ktn1 PE=1 SV=1	16.89	Control_MRlabs	Control_MRlabs
Q9CYN9	Renin receptor OS=Mus musculus OX=10090 GN=Atp6ap2 PE=1 SV=2	28.1	Control_MRlabs	Control_MRlabs
Q8K0C9	GDP-mannose 4,6 dehydratase OS=Mus musculus OX=10090 GN=Gmds PE=1 SV=1	60.32	Control_MRlabs	Control_MRlabs
Q8R0N9	Probable palmitoyltransferase ZDHHC1 OS=Mus musculus OX=10090 GN=Zdhhc1 PE=2 SV=2	19.61	Control_MRlabs	Control_MRlabs
O08672	Kinesin-like protein KIFC2 OS=Mus musculus OX=10090 GN=Kifc2 PE=1 SV=1	45.24	Control_MRlabs	Control_MRlabs
P21180	Complement C2 OS=Mus musculus OX=10090 GN=C2 PE=1 SV=2	98.91	Control_MRlabs	Control_MRlabs
Q8R0N6	Hydroxyacid-oxoacid transhydrogenase, mitochondrial OS=Mus musculus OX=10090 GN=Adhfe1 PE=1 SV=2	78.34	Control_MRlabs	Control_MRlabs
P58854	Gamma-tubulin complex component 3 OS=Mus musculus OX=10090 GN=Tubgcp3 PE=1 SV=2	61.65	Control_MRlabs	Control_MRlabs
Q5SX40	Myosin-1 OS=Mus musculus OX=10090 GN=Myh1 PE=1 SV=1	57.79	Control_MRlabs	Control_MRlabs
Q61586	Glycerol-3-phosphate acyltransferase 1, mitochondrial OS=Mus musculus OX=10090 GN=Gpam PE=1 SV=2	56.33	Control_MRlabs	Control_MRlabs
P0DMR6	TD and POZ domain-containing protein 1-like OS=Mus musculus OX=10090 GN=Gm9125 PE=2 SV=1	13.84	Control_MRlabs	Control_MRlabs
P0DMR5	TD and POZ domain-containing protein 1 OS=Mus musculus OX=10090 GN=Tdpoz1 PE=2 SV=1	13.84	Control_MRlabs	Control_MRlabs
Q5SX39	Myosin-4 OS=Mus musculus OX=10090 GN=Myh4 PE=2 SV=1	130.8	Control_MRlabs	Control_MRlabs
O08665	Semaphorin-3A OS=Mus musculus OX=10090 GN=Sema3a PE=1 SV=2	76.96	Control_MRlabs	Control_MRlabs
Q8R0M8	Monocarboxylate transporter 5 OS=Mus musculus OX=10090 GN=Slc16a4 PE=2 SV=1	44.02	Control_MRlabs	Control_MRlabs
O08663	Methionine aminopeptidase 2 OS=Mus musculus OX=10090 GN=Metap2 PE=1 SV=1	103.94	Control_MRlabs	Control_MRlabs
Q9QZD4	DNA repair endonuclease XPF OS=Mus musculus OX=10090 GN=Ercc4 PE=1 SV=3	74.6	Control_MRlabs	Control_MRlabs
Q8K0B3	Leucine-rich repeat-containing protein 66 OS=Mus musculus OX=10090 GN=Lrrc66 PE=1 SV=1	118.44	Control_MRlabs	Control_MRlabs
Q8C5D8	E3 SUMO-protein ligase PIAS2 OS=Mus musculus OX=10090 GN=Pias2 PE=1 SV=2	23.13	Control_MRlabs	Control_MRlabs
A0A0M3U1B0	Synaptonemal complex protein 2-like OS=Mus musculus OX=10090 GN=Sycp2l PE=2 SV=1	32.93	Control_MRlabs	Control_MRlabs
Q99P88	Nuclear pore complex protein Nup155 OS=Mus musculus OX=10090 GN=Nup155 PE=1 SV=1	48.43	Control_MRlabs	Control_MRlabs
Q9QZC1	Short transient receptor potential channel 3 OS=Mus musculus OX=10090 GN=Trpc3 PE=2 SV=1	14.95	Control_MRlabs	Control_MRlabs
P56654	Cytochrome P450 2C37 OS=Mus musculus OX=10090 GN=Cyp2c37 PE=1 SV=2	55.55	Control_MRlabs	Control_MRlabs
P52293	Importin subunit alpha-1 OS=Mus musculus OX=10090 GN=Kpna2 PE=1 SV=2	3.29	Control_MRlabs	Control_MRlabs
F6XZJ7	Sterile alpha motif domain-containing protein 15 OS=Mus musculus OX=10090 GN=Samd15 PE=4 SV=2	35.5	Control_MRlabs	Control_MRlabs
Q8BGI5	Peroxisome assembly protein 26 OS=Mus musculus OX=10090 GN=Pex26 PE=1 SV=2	173.42	Control_MRlabs	Control_MRlabs
Q9QZB7	Actin-related protein 10 OS=Mus musculus OX=10090 GN=Actr10 PE=1 SV=2	80.48	Control_MRlabs	Control_MRlabs
Q3UPY5	Beta-galactosidase-1-like protein 2 OS=Mus musculus OX=10090 GN=Glb1l2 PE=1 SV=1	68.42	Control_MRlabs	Control_MRlabs
Q99P72	Reticulon-4 OS=Mus musculus OX=10090 GN=Rtn4 PE=1 SV=2	135.43	Control_MRlabs	Control_MRlabs
P62069	Ubiquitin carboxyl-terminal hydrolase 46 OS=Mus musculus OX=10090 GN=Usp46 PE=1 SV=1	148.21	Control_MRlabs	Control_MRlabs
P11370	Retrovirus-related Env polyprotein from Fv-4 locus OS=Mus musculus OX=10090 GN=Fv4 PE=1 SV=2	288.6	Control_MRlabs	Control_MRlabs
Q61553	Fascin OS=Mus musculus OX=10090 GN=Fscn1 PE=1 SV=4	102.74	Control_MRlabs	Control_MRlabs
Q76K27	Beta-galactoside alpha-2,6-sialyltransferase 2 OS=Mus musculus OX=10090 GN=St6gal2 PE=2 SV=2	75.61	Control_MRlabs	Control_MRlabs
P11369	LINE-1 retrotransposable element ORF2 protein OS=Mus musculus OX=10090 GN=Pol PE=1 SV=2	46.33	Control_MRlabs	Control_MRlabs
P13542	Myosin-8 OS=Mus musculus OX=10090 GN=Myh8 PE=2 SV=2	78.83	Control_MRlabs	Control_MRlabs
O88286	Protein Wiz OS=Mus musculus OX=10090 GN=Wiz PE=1 SV=2	67.67	Control_MRlabs	Control_MRlabs
P13541	Myosin-3 OS=Mus musculus OX=10090 GN=Myh3 PE=2 SV=2	69.58	Control_MRlabs	Control_MRlabs
Q8R0J1	Pleckstrin homology domain-containing family G member 6 OS=Mus musculus OX=10090 GN=Plekhg6 PE=2 SV=2	83.67	Control_MRlabs	Control_MRlabs
Q61549	Adhesion G protein-coupled receptor E1 OS=Mus musculus OX=10090 GN=Adgre1 PE=1 SV=1	139.84	Control_MRlabs	Control_MRlabs
Q810N9	Coiled-coil domain-containing protein 172 OS=Mus musculus OX=10090 GN=Ccdc172 PE=1 SV=1	13.13	Control_MRlabs	Control_MRlabs
Q8BGG7	Ubiquitin-associated and SH3 domain-containing protein B OS=Mus musculus OX=10090 GN=Ubash3b PE=1 SV=1	3.46	Control_MRlabs	Control_MRlabs
Q8BGG6	Motile sperm domain-containing protein 3 OS=Mus musculus OX=10090 GN=Mospd3 PE=2 SV=1	81.11	Control_MRlabs	Control_MRlabs
Q3UQ84	Threonine--tRNA ligase, mitochondrial OS=Mus musculus OX=10090 GN=Tars2 PE=1 SV=1	74.48	Control_MRlabs	Control_MRlabs
Q8R0I0	Angiotensin-converting enzyme 2 OS=Mus musculus OX=10090 GN=Ace2 PE=1 SV=1	28.75	Control_MRlabs	Control_MRlabs
P09056	Leukemia inhibitory factor OS=Mus musculus OX=10090 GN=Lif PE=1 SV=1	73.34	Control_MRlabs	Control_MRlabs
P62046	Leucine-rich repeat and calponin homology domain-containing protein 1 OS=Mus musculus OX=10090 GN=Lrch1 PE=1 SV=2	45.83	Control_MRlabs	Control_MRlabs
P09055	Integrin beta-1 OS=Mus musculus OX=10090 GN=Itgb1 PE=1 SV=1	73.83	Control_MRlabs	Control_MRlabs
Q9JLZ6	Hypermethylated in cancer 2 protein OS=Mus musculus OX=10090 GN=Hic2 PE=2 SV=4	26.4	Control_MRlabs	Control_MRlabs
P01573	Interferon alpha-2 OS=Mus musculus OX=10090 GN=Ifna2 PE=2 SV=1	163.11	Control_MRlabs	Control_MRlabs
Q9CYH6	Ribosome biogenesis regulatory protein homolog OS=Mus musculus OX=10090 GN=Rrs1 PE=1 SV=1	7.31	Control_MRlabs	Control_MRlabs
Q99P47	Contactin-associated protein-like 4 OS=Mus musculus OX=10090 GN=Cntnap4 PE=1 SV=2	42.26	Control_MRlabs	Control_MRlabs
E9PZ19	Protein turtle homolog B OS=Mus musculus OX=10090 GN=Igsf9b PE=1 SV=1	82.72	Control_MRlabs	Control_MRlabs
Q3V1V3	ESF1 homolog OS=Mus musculus OX=10090 GN=Esf1 PE=1 SV=1	87.93	Control_MRlabs	Control_MRlabs
P11344	Tyrosinase OS=Mus musculus OX=10090 GN=Tyr PE=1 SV=3	13	Control_MRlabs	Control_MRlabs
Q925U4	ER degradation-enhancing alpha-mannosidase-like protein 1 OS=Mus musculus OX=10090 GN=Edem1 PE=1 SV=1	21.81	Control_MRlabs	Control_MRlabs
Q61526	Receptor tyrosine-protein kinase erbB-3 OS=Mus musculus OX=10090 GN=Erbb3 PE=1 SV=2	21.26	Control_MRlabs	Control_MRlabs
Q810L3	E3 ubiquitin-protein ligase CHFR OS=Mus musculus OX=10090 GN=Chfr PE=1 SV=1	93.22	Control_MRlabs	Control_MRlabs
Q7TMY7	Importin-8 OS=Mus musculus OX=10090 GN=Ipo8 PE=1 SV=3	90.02	Control_MRlabs	Control_MRlabs
Q8BGE5	Fanconi anemia group M protein homolog OS=Mus musculus OX=10090 GN=Fancm PE=1 SV=3	70.6	Control_MRlabs	Control_MRlabs
Q8R0G7	Protein spinster homolog 1 OS=Mus musculus OX=10090 GN=Spns1 PE=2 SV=1	19.55	Control_MRlabs	Control_MRlabs
O08601	Microsomal triglyceride transfer protein large subunit OS=Mus musculus OX=10090 GN=Mttp PE=1 SV=2	2.37	Control_MRlabs	Control_MRlabs
Q3V1U8	ELMO domain-containing protein 1 OS=Mus musculus OX=10090 GN=Elmod1 PE=1 SV=2	12.6	Control_MRlabs	Control_MRlabs
O35385	Serine/threonine-protein phosphatase with EF-hands 2 OS=Mus musculus OX=10090 GN=Ppef2 PE=2 SV=1	30.36	Control_MRlabs	Control_MRlabs
O35381	Acidic leucine-rich nuclear phosphoprotein 32 family member A OS=Mus musculus OX=10090 GN=Anp32a PE=1 SV=1	24.86	Control_MRlabs	Control_MRlabs
Q2MKA5	Neuronal acetylcholine receptor subunit alpha-5 OS=Mus musculus OX=10090 GN=Chrna5 PE=2 SV=1	68.25	Control_MRlabs	Control_MRlabs
Q9JM98	WD repeat-containing protein WRAP73 OS=Mus musculus OX=10090 GN=Wrap73 PE=1 SV=2	181.12	Control_MRlabs	Control_MRlabs
B2RR83	Probable ATP-dependent RNA helicase YTHDC2 OS=Mus musculus OX=10090 GN=Ythdc2 PE=1 SV=1	13.78	Control_MRlabs	Control_MRlabs
Q0VDU3	G-protein coupled receptor 15 OS=Mus musculus OX=10090 GN=Gpr15 PE=2 SV=2	289.95	Control_MRlabs	Control_MRlabs
P21107	Tropomyosin alpha-3 chain OS=Mus musculus OX=10090 GN=Tpm3 PE=1 SV=3	31.06	Control_MRlabs	Control_MRlabs
Q7TN99	Cytoplasmic polyadenylation element-binding protein 3 OS=Mus musculus OX=10090 GN=Cpeb3 PE=1 SV=1	37.73	Control_MRlabs	Control_MRlabs
Q8BGD9	Eukaryotic translation initiation factor 4B OS=Mus musculus OX=10090 GN=Eif4b PE=1 SV=1	92.63	Control_MRlabs	Control_MRlabs
Q8R0F9	SEC14-like protein 4 OS=Mus musculus OX=10090 GN=Sec14l4 PE=1 SV=1	149.95	Control_MRlabs	Control_MRlabs
Q8BGD4	Solute carrier organic anion transporter family member 4C1 OS=Mus musculus OX=10090 GN=Slco4c1 PE=1 SV=1	39.12	Control_MRlabs	Control_MRlabs
O35379	Multidrug resistance-associated protein 1 OS=Mus musculus OX=10090 GN=Abcc1 PE=1 SV=1	54.2	Control_MRlabs	Control_MRlabs
Q3V1T4	Prolyl 3-hydroxylase 1 OS=Mus musculus OX=10090 GN=P3h1 PE=1 SV=2	72.3	Control_MRlabs	Control_MRlabs
O35375	Neuropilin-2 OS=Mus musculus OX=10090 GN=Nrp2 PE=1 SV=2	106.18	Control_MRlabs	Control_MRlabs
Q810J8	Zinc finger FYVE domain-containing protein 1 OS=Mus musculus OX=10090 GN=Zfyve1 PE=1 SV=2	34.83	Control_MRlabs	Control_MRlabs
Q8CB67	Low-density lipoprotein receptor-related protein 11 OS=Mus musculus OX=10090 GN=Lrp11 PE=1 SV=1	75.28	Control_MRlabs	Control_MRlabs
Q61500	Integral membrane protein 2A OS=Mus musculus OX=10090 GN=Itm2a PE=2 SV=2	32.81	Control_MRlabs	Control_MRlabs
P97501	Dimethylaniline monooxygenase [N-oxide-forming] 3 OS=Mus musculus OX=10090 GN=Fmo3 PE=1 SV=1	14	Control_MRlabs	Control_MRlabs
Q7TN84	Synaptotagmin-14 OS=Mus musculus OX=10090 GN=Syt14 PE=2 SV=1	45.81	Control_MRlabs	Control_MRlabs
Q6P2L6	Histone-lysine N-methyltransferase NSD3 OS=Mus musculus OX=10090 GN=Nsd3 PE=1 SV=2	90.64	Control_MRlabs	Control_MRlabs
Q8R0E5	Putative uncharacterized protein ZNRD1-AS1 OS=Mus musculus OX=10090 GN=Znrd1-as PE=2 SV=2	70.56	Control_MRlabs	Control_MRlabs
Q08509	Epidermal growth factor receptor kinase substrate 8 OS=Mus musculus OX=10090 GN=Eps8 PE=1 SV=2	7.21	Control_MRlabs	Control_MRlabs
Q3TVA9	Coiled-coil domain-containing protein 136 OS=Mus musculus OX=10090 GN=Ccdc136 PE=1 SV=2	41.41	Control_MRlabs	Control_MRlabs
Q8CB59	Protein FAM161B OS=Mus musculus OX=10090 GN=Fam161b PE=1 SV=1	67.2	Control_MRlabs	Control_MRlabs
Q9JLV5	Cullin-3 OS=Mus musculus OX=10090 GN=Cul3 PE=1 SV=1	101.75	Control_MRlabs	Control_MRlabs
Q9QYZ8	Dickkopf-related protein 2 OS=Mus musculus OX=10090 GN=Dkk2 PE=1 SV=2	46.88	Control_MRlabs	Control_MRlabs
P22892	AP-1 complex subunit gamma-1 OS=Mus musculus OX=10090 GN=Ap1g1 PE=1 SV=3	37.56	Control_MRlabs	Control_MRlabs
Q6P2K6	Serine/threonine-protein phosphatase 4 regulatory subunit 3A OS=Mus musculus OX=10090 GN=Ppp4r3a PE=1 SV=1	13.47	Control_MRlabs	Control_MRlabs
Q32NY4	Metal transporter CNNM3 OS=Mus musculus OX=10090 GN=Cnnm3 PE=1 SV=2	41.27	Control_MRlabs	Control_MRlabs
Q8K093	Thyrotropin-releasing hormone-degrading ectoenzyme OS=Mus musculus OX=10090 GN=Trhde PE=1 SV=1	103.22	Control_MRlabs	Control_MRlabs
Q6P2K3	Uncharacterized protein C3orf67 homolog OS=Mus musculus OX=10090 PE=2 SV=2	32.84	Control_MRlabs	Control_MRlabs
E9PYL2	Proline-rich protein 12 OS=Mus musculus OX=10090 GN=Prr12 PE=1 SV=1	78.44	Control_MRlabs	Control_MRlabs
O35350	Calpain-1 catalytic subunit OS=Mus musculus OX=10090 GN=Capn1 PE=1 SV=1	94.22	Control_MRlabs	Control_MRlabs
Q8CAS9	Poly [ADP-ribose] polymerase 9 OS=Mus musculus OX=10090 GN=Parp9 PE=1 SV=2	92.36	Control_MRlabs	Control_MRlabs
A9Z1V5	von Willebrand factor A domain-containing protein 5B1 OS=Mus musculus OX=10090 GN=Vwa5b1 PE=2 SV=1	26.16	Control_MRlabs	Control_MRlabs
Q70E20	Sushi, nidogen and EGF-like domain-containing protein 1 OS=Mus musculus OX=10090 GN=Sned1 PE=2 SV=2	52.94	Control_MRlabs	Control_MRlabs
B9EJ86	Oxysterol-binding protein-related protein 8 OS=Mus musculus OX=10090 GN=Osbpl8 PE=1 SV=1	45.36	Control_MRlabs	Control_MRlabs
Q9QYY7	Endothelial cell-specific molecule 1 OS=Mus musculus OX=10090 GN=Esm1 PE=2 SV=1	118.67	Control_MRlabs	Control_MRlabs
Q9CYC3	Transmembrane protein 39A OS=Mus musculus OX=10090 GN=Tmem39a PE=2 SV=1	46.16	Control_MRlabs	Control_MRlabs
Q3UQ28	Peroxidasin homolog OS=Mus musculus OX=10090 GN=Pxdn PE=1 SV=2	39.81	Control_MRlabs	Control_MRlabs
Q3B7Z2	Oxysterol-binding protein 1 OS=Mus musculus OX=10090 GN=Osbp PE=1 SV=3	54.99	Control_MRlabs	Control_MRlabs
Q9JLT2	Trehalase OS=Mus musculus OX=10090 GN=Treh PE=1 SV=1	49.01	Control_MRlabs	Control_MRlabs
Q8K078	Solute carrier organic anion transporter family member 4A1 OS=Mus musculus OX=10090 GN=Slco4a1 PE=1 SV=2	113.55	Control_MRlabs	Control_MRlabs
Q7TN51	Mas-related G-protein coupled receptor member B8 OS=Mus musculus OX=10090 GN=Mrgprb8 PE=2 SV=1	95.19	Control_MRlabs	Control_MRlabs
Q3UPP8	Centrosomal protein of 63 kDa OS=Mus musculus OX=10090 GN=Cep63 PE=1 SV=2	117.74	Control_MRlabs	Control_MRlabs
Q8R0A6	V-set and transmembrane domain-containing protein 2A OS=Mus musculus OX=10090 GN=Vstm2a PE=1 SV=2	93.52	Control_MRlabs	Control_MRlabs
Q8C4W3	Neuritin-like protein OS=Mus musculus OX=10090 GN=Nrn1l PE=2 SV=2	44.64	Control_MRlabs	Control_MRlabs
Q8CB14	Lung adenoma susceptibility protein 2 OS=Mus musculus OX=10090 GN=Las2 PE=2 SV=1	3.88	Control_MRlabs	Control_MRlabs
Q7TN37	Transient receptor potential cation channel subfamily M member 4 OS=Mus musculus OX=10090 GN=Trpm4 PE=1 SV=1	52.62	Control_MRlabs	Control_MRlabs
Q7TN31	Angiogenic factor with G patch and FHA domains 1 OS=Mus musculus OX=10090 GN=Aggf1 PE=2 SV=1	150.08	Control_MRlabs	Control_MRlabs
Q6J9G1	Tyrosine-protein kinase STYK1 OS=Mus musculus OX=10090 GN=Styk1 PE=2 SV=2	34.08	Control_MRlabs	Control_MRlabs
O35316	Sodium- and chloride-dependent taurine transporter OS=Mus musculus OX=10090 GN=Slc6a6 PE=1 SV=2	17.76	Control_MRlabs	Control_MRlabs
Q3V1N1	Malignant fibrous histiocytoma-amplified sequence 1 homolog OS=Mus musculus OX=10090 GN=Mfhas1 PE=2 SV=2	16.61	Control_MRlabs	Control_MRlabs
Q8C4V1	Rho GTPase-activating protein 24 OS=Mus musculus OX=10090 GN=Arhgap24 PE=1 SV=2	40.14	Control_MRlabs	Control_MRlabs
Q0VDN7	RUN domain-containing protein 1 OS=Mus musculus OX=10090 GN=Rundc1 PE=1 SV=1	135.44	Control_MRlabs	Control_MRlabs
Q9JLQ2	ARF GTPase-activating protein GIT2 OS=Mus musculus OX=10090 GN=Git2 PE=1 SV=2	210.49	Control_MRlabs	Control_MRlabs
Q5SWD9	Pre-rRNA-processing protein TSR1 homolog OS=Mus musculus OX=10090 GN=Tsr1 PE=1 SV=1	64.88	Control_MRlabs	Control_MRlabs
P59281	Rho GTPase-activating protein 39 OS=Mus musculus OX=10090 GN=Arhgap39 PE=1 SV=2	47.45	Control_MRlabs	Control_MRlabs
P59280	Kelch-like protein 8 OS=Mus musculus OX=10090 GN=Klhl8 PE=2 SV=2	40.27	Control_MRlabs	Control_MRlabs
P20662	Zinc finger Y-chromosomal protein 2 OS=Mus musculus OX=10090 GN=Zfy2 PE=2 SV=2	63.88	Control_MRlabs	Control_MRlabs
O35304	Vesicular acetylcholine transporter OS=Mus musculus OX=10090 GN=Slc18a3 PE=1 SV=1	129.01	Control_MRlabs	Control_MRlabs
Q8C4U2	Transmembrane protein 145 OS=Mus musculus OX=10090 GN=Tmem145 PE=1 SV=1	12.6	Control_MRlabs	Control_MRlabs
Q8BT60	Copine-3 OS=Mus musculus OX=10090 GN=Cpne3 PE=1 SV=2	139.78	Control_MRlabs	Control_MRlabs
Q7TN16	Hedgehog-interacting protein OS=Mus musculus OX=10090 GN=Hhip PE=1 SV=2	2.82	Control_MRlabs	Control_MRlabs
G3X9J0	Signal-induced proliferation-associated 1-like protein 3 OS=Mus musculus OX=10090 GN=Sipa1l3 PE=1 SV=1	44.42	Control_MRlabs	Control_MRlabs
Q9QZ57	Heat shock protein beta-3 OS=Mus musculus OX=10090 GN=Hspb3 PE=2 SV=1	34.14	Control_MRlabs	Control_MRlabs
P81122	Insulin receptor substrate 2 OS=Mus musculus OX=10090 GN=Irs2 PE=1 SV=2	29.43	Control_MRlabs	Control_MRlabs
Q3V1L6	Myotubularin-related protein 11 OS=Mus musculus OX=10090 GN=Mtmr11 PE=2 SV=1	78.41	Control_MRlabs	Control_MRlabs
P51791	H(+)/Cl(-) exchange transporter 3 OS=Mus musculus OX=10090 GN=Clcn3 PE=1 SV=2	181.43	Control_MRlabs	Control_MRlabs
Q810B6	Rabankyrin-5 OS=Mus musculus OX=10090 GN=Ankfy1 PE=1 SV=2	15.99	Control_MRlabs	Control_MRlabs
Q8BFZ8	Protein FAM72A OS=Mus musculus OX=10090 GN=Fam72a PE=1 SV=1	240.41	Control_MRlabs	Control_MRlabs
Q7TN02	Mediator of RNA polymerase II transcription subunit 26 OS=Mus musculus OX=10090 GN=Med26 PE=1 SV=1	71.69	Control_MRlabs	Control_MRlabs
Q8BFZ1	Trans-2,3-enoyl-CoA reductase-like OS=Mus musculus OX=10090 GN=Tecrl PE=1 SV=1	18.01	Control_MRlabs	Control_MRlabs
Q8BSS9	Liprin-alpha-2 OS=Mus musculus OX=10090 GN=Ppfia2 PE=1 SV=2	79.68	Control_MRlabs	Control_MRlabs
Q8C4S8	DENN domain-containing protein 2A OS=Mus musculus OX=10090 GN=Dennd2a PE=1 SV=1	50.79	Control_MRlabs	Control_MRlabs
Q8C547	HEAT repeat-containing protein 5B OS=Mus musculus OX=10090 GN=Heatr5b PE=1 SV=3	69.22	Control_MRlabs	Control_MRlabs
Q925J9	Mediator of RNA polymerase II transcription subunit 1 OS=Mus musculus OX=10090 GN=Med1 PE=1 SV=2	58.32	Control_MRlabs	Control_MRlabs
Q9JLN5	Erythroid membrane-associated protein OS=Mus musculus OX=10090 GN=Ermap PE=1 SV=2	97.29	Control_MRlabs	Control_MRlabs
Q810A5	Uncharacterized protein KIAA0895-like OS=Mus musculus OX=10090 GN=Kiaa0895l PE=2 SV=1	39.49	Control_MRlabs	Control_MRlabs
P30416	Peptidyl-prolyl cis-trans isomerase FKBP4 OS=Mus musculus OX=10090 GN=Fkbp4 PE=1 SV=5	163.39	Control_MRlabs	Control_MRlabs
Q810A1	Zinc finger protein 18 OS=Mus musculus OX=10090 GN=Znf18 PE=2 SV=1	2.03	Control_MRlabs	Control_MRlabs
Q8BFY9	Transportin-1 OS=Mus musculus OX=10090 GN=Tnpo1 PE=1 SV=2	57.25	Control_MRlabs	Control_MRlabs
Q3MI48	Junctional sarcoplasmic reticulum protein 1 OS=Mus musculus OX=10090 GN=Jsrp1 PE=1 SV=2	45.1	Control_MRlabs	Control_MRlabs
P18337	L-selectin OS=Mus musculus OX=10090 GN=Sell PE=1 SV=1	41.4	Control_MRlabs	Control_MRlabs
B1AVH7	TBC1 domain family member 2A OS=Mus musculus OX=10090 GN=Tbc1d2 PE=2 SV=1	36.23	Control_MRlabs	Control_MRlabs
Q9JLM9	Growth factor receptor-bound protein 14 OS=Mus musculus OX=10090 GN=Grb14 PE=1 SV=1	16.72	Control_MRlabs	Control_MRlabs
Q9JLM8	Serine/threonine-protein kinase DCLK1 OS=Mus musculus OX=10090 GN=Dclk1 PE=1 SV=1	51.29	Control_MRlabs	Control_MRlabs
Q8CAK3	Repressor of yield of DENV protein homolog OS=Mus musculus OX=10090 GN=Ryden PE=2 SV=1	37.05	Control_MRlabs	Control_MRlabs
P08553	Neurofilament medium polypeptide OS=Mus musculus OX=10090 GN=Nefm PE=1 SV=4	216.92	Control_MRlabs	Control_MRlabs
O09061	Proteasome subunit beta type-1 OS=Mus musculus OX=10090 GN=Psmb1 PE=1 SV=1	267.09	Control_MRlabs	Control_MRlabs
P08551	Neurofilament light polypeptide OS=Mus musculus OX=10090 GN=Nefl PE=1 SV=5	3.66	Control_MRlabs	Control_MRlabs
P59240	Nephrocystin-4 OS=Mus musculus OX=10090 GN=Nphp4 PE=1 SV=2	14.35	Control_MRlabs	Control_MRlabs
Q8K007	Extracellular sulfatase Sulf-1 OS=Mus musculus OX=10090 GN=Sulf1 PE=2 SV=1	37.83	Control_MRlabs	Control_MRlabs
Q9D9Z1	Small kinetochore-associated protein OS=Mus musculus OX=10090 GN=Knstrn PE=2 SV=2	51.72	Control_MRlabs	Control_MRlabs
Q8BSQ9	Protein polybromo-1 OS=Mus musculus OX=10090 GN=Pbrm1 PE=1 SV=4	76.81	Control_MRlabs	Control_MRlabs
Q8C4Q6	Axin interactor, dorsalization-associated protein OS=Mus musculus OX=10090 GN=Aida PE=1 SV=1	65.58	Control_MRlabs	Control_MRlabs
Q925H3	Keratin-associated protein 6-5 OS=Mus musculus OX=10090 GN=Krtap6-5 PE=2 SV=1	115.78	Control_MRlabs	Control_MRlabs
O09053	Werner syndrome ATP-dependent helicase homolog OS=Mus musculus OX=10090 GN=Wrn PE=1 SV=3	29.83	Control_MRlabs	Control_MRlabs
Q9JLL3	Tumor necrosis factor receptor superfamily member 19 OS=Mus musculus OX=10090 GN=Tnfrsf19 PE=2 SV=2	62.05	Control_MRlabs	Control_MRlabs
Q8BFW9	Solute carrier family 2, facilitated glucose transporter member 12 OS=Mus musculus OX=10090 GN=Slc2a12 PE=2 SV=1	54.33	Control_MRlabs	Control_MRlabs
Q8BG89	Protein ZNF365 OS=Mus musculus OX=10090 GN=Znf365 PE=1 SV=1	125.77	Control_MRlabs	Control_MRlabs
Q8BG87	Methylcytosine dioxygenase TET3 OS=Mus musculus OX=10090 GN=Tet3 PE=1 SV=3	19.56	Control_MRlabs	Control_MRlabs
Q8BFW3	Protein phosphatase 1 regulatory subunit 15B OS=Mus musculus OX=10090 GN=Ppp1r15b PE=1 SV=1	7.87	Control_MRlabs	Control_MRlabs
Q9QZ15	C-type lectin domain family 4 member A OS=Mus musculus OX=10090 GN=Clec4a PE=1 SV=1	180.76	Control_MRlabs	Control_MRlabs
P04187	Granzyme B(G,H) OS=Mus musculus OX=10090 GN=Gzmb PE=1 SV=1	227	Control_MRlabs	Control_MRlabs
P04186	Complement factor B OS=Mus musculus OX=10090 GN=Cfb PE=1 SV=2	141.59	Control_MRlabs	Control_MRlabs
Q9QZ11	Exonuclease 1 OS=Mus musculus OX=10090 GN=Exo1 PE=2 SV=2	53.17	Control_MRlabs	Control_MRlabs
Q3V1H3	Hephaestin-like protein 1 OS=Mus musculus OX=10090 GN=Hephl1 PE=2 SV=2	55.05	Control_MRlabs	Control_MRlabs
P49452	Centromere protein C OS=Mus musculus OX=10090 GN=Cenpc PE=1 SV=2	77.36	Control_MRlabs	Control_MRlabs
Q3V1H1	Cytoskeleton-associated protein 2 OS=Mus musculus OX=10090 GN=Ckap2 PE=1 SV=1	33.45	Control_MRlabs	Control_MRlabs
Q3U6U5	Putative GTP-binding protein 6 OS=Mus musculus OX=10090 GN=Gtpbp6 PE=1 SV=1	33.31	Control_MRlabs	Control_MRlabs
O09049	Regenerating islet-derived protein 3-gamma OS=Mus musculus OX=10090 GN=Reg3g PE=1 SV=1	245.4	Control_MRlabs	Control_MRlabs
Q9JLK7	Calcium-binding protein 1 OS=Mus musculus OX=10090 GN=Cabp1 PE=1 SV=3	277.96	Control_MRlabs	Control_MRlabs
P10833	Ras-related protein R-Ras OS=Mus musculus OX=10090 GN=Rras PE=1 SV=1	10.62	Control_MRlabs	Control_MRlabs
Q8CAI1	Coiled-coil domain-containing protein 142 OS=Mus musculus OX=10090 GN=Ccdc142 PE=2 SV=2	96.6	Control_MRlabs	Control_MRlabs
P59222	Scavenger receptor class F member 2 OS=Mus musculus OX=10090 GN=Scarf2 PE=1 SV=1	56.83	Control_MRlabs	Control_MRlabs
Q8BG75	Transmembrane protein 198 OS=Mus musculus OX=10090 GN=Tmem198 PE=2 SV=1	13.71	Control_MRlabs	Control_MRlabs
Q640R3	Hepatocyte cell adhesion molecule OS=Mus musculus OX=10090 GN=Hepacam PE=1 SV=2	7.47	Control_MRlabs	Control_MRlabs
Q3V1G4	Olfactomedin-like protein 2B OS=Mus musculus OX=10090 GN=Olfml2b PE=1 SV=2	10.63	Control_MRlabs	Control_MRlabs
P10820	Perforin-1 OS=Mus musculus OX=10090 GN=Prf1 PE=1 SV=2	127.76	Control_MRlabs	Control_MRlabs
P61514	60S ribosomal protein L37a OS=Mus musculus OX=10090 GN=Rpl37a PE=1 SV=2	130.51	Control_MRlabs	Control_MRlabs
Q64127	Transcription intermediary factor 1-alpha OS=Mus musculus OX=10090 GN=Trim24 PE=1 SV=1	46.64	Control_MRlabs	Control_MRlabs
Q9CXW3	Calcyclin-binding protein OS=Mus musculus OX=10090 GN=Cacybp PE=1 SV=1	60.63	Control_MRlabs	Control_MRlabs
Q9CXW2	28S ribosomal protein S22, mitochondrial OS=Mus musculus OX=10090 GN=Mrps22 PE=1 SV=1	53.45	Control_MRlabs	Control_MRlabs
P39655	Arachidonate 12-lipoxygenase, 12S-type OS=Mus musculus OX=10090 GN=Alox12 PE=1 SV=4	22.6	Control_MRlabs	Control_MRlabs
P39654	Arachidonate 15-lipoxygenase OS=Mus musculus OX=10090 GN=Alox15 PE=1 SV=4	132.58	Control_MRlabs	Control_MRlabs
Q9JLI3	Membrane metallo-endopeptidase-like 1 OS=Mus musculus OX=10090 GN=Mmel1 PE=1 SV=1	62.22	Control_MRlabs	Control_MRlabs
G3X9C2	F-box only protein 50 OS=Mus musculus OX=10090 GN=Nccrp1 PE=1 SV=2	77.23	Control_MRlabs	Control_MRlabs
Q8BFT6	JmjC domain-containing protein 4 OS=Mus musculus OX=10090 GN=Jmjd4 PE=2 SV=1	108.12	Control_MRlabs	Control_MRlabs
Q64112	Interferon-induced protein with tetratricopeptide repeats 2 OS=Mus musculus OX=10090 GN=Ifit2 PE=1 SV=1	155.81	Control_MRlabs	Control_MRlabs
Q9D9V3	Ethylmalonyl-CoA decarboxylase OS=Mus musculus OX=10090 GN=Echdc1 PE=1 SV=2	37.64	Control_MRlabs	Control_MRlabs
P49429	4-hydroxyphenylpyruvate dioxygenase OS=Mus musculus OX=10090 GN=Hpd PE=1 SV=3	8.75	Control_MRlabs	Control_MRlabs
Q8BG51	Mitochondrial Rho GTPase 1 OS=Mus musculus OX=10090 GN=Rhot1 PE=1 SV=1	19.24	Control_MRlabs	Control_MRlabs
Q8BG50	Transmembrane protein 169 OS=Mus musculus OX=10090 GN=Tmem169 PE=2 SV=1	113.46	Control_MRlabs	Control_MRlabs
Q8R070	Glucose-6-phosphate exchanger SLC37A1 OS=Mus musculus OX=10090 GN=Slc37a1 PE=2 SV=1	15.86	Control_MRlabs	Control_MRlabs
Q8CAF4	NHS-like protein 1 OS=Mus musculus OX=10090 GN=Nhsl1 PE=1 SV=3	122.85	Control_MRlabs	Control_MRlabs
Q8BFS9	Asparagine synthetase domain-containing protein 1 OS=Mus musculus OX=10090 GN=Asnsd1 PE=2 SV=1	67.93	Control_MRlabs	Control_MRlabs
Q05816	Fatty acid-binding protein, epidermal OS=Mus musculus OX=10090 GN=Fabp5 PE=1 SV=3	133.99	Control_MRlabs	Control_MRlabs
Q9CY64	Biliverdin reductase A OS=Mus musculus OX=10090 GN=Blvra PE=1 SV=1	45.97	Control_MRlabs	Control_MRlabs
P06320	T-cell receptor beta chain V region CTL-F3 OS=Mus musculus OX=10090 PE=4 SV=1	284.74	Control_MRlabs	Control_MRlabs
Q8R060	Protein zwilch homolog OS=Mus musculus OX=10090 GN=Zwilch PE=1 SV=1	35.71	Control_MRlabs	Control_MRlabs
P27681	Gamma-aminobutyric acid receptor subunit gamma-3 OS=Mus musculus OX=10090 GN=Gabrg3 PE=2 SV=2	21.52	Control_MRlabs	Control_MRlabs
Q3U6Q4	Phosphoinositide 3-kinase regulatory subunit 6 OS=Mus musculus OX=10090 GN=Pik3r6 PE=1 SV=1	28.68	Control_MRlabs	Control_MRlabs
Q8CAE9	Podocalyxin-like protein 2 OS=Mus musculus OX=10090 GN=Podxl2 PE=1 SV=2	2.53	Control_MRlabs	Control_MRlabs
O09000	Nuclear receptor coactivator 3 OS=Mus musculus OX=10090 GN=Ncoa3 PE=1 SV=2	79.06	Control_MRlabs	Control_MRlabs
Q9CXT8	Mitochondrial-processing peptidase subunit beta OS=Mus musculus OX=10090 GN=Pmpcb PE=1 SV=1	64.67	Control_MRlabs	Control_MRlabs
Q9CY58	Plasminogen activator inhibitor 1 RNA-binding protein OS=Mus musculus OX=10090 GN=Serbp1 PE=1 SV=2	21.74	Control_MRlabs	Control_MRlabs
Q8BFR6	AN1-type zinc finger protein 1 OS=Mus musculus OX=10090 GN=Zfand1 PE=1 SV=1	136.73	Control_MRlabs	Control_MRlabs
Q9CXT6	JmjC domain-containing protein 5 OS=Mus musculus OX=10090 GN=Kdm8 PE=2 SV=1	47.61	Control_MRlabs	Control_MRlabs
Q640N3	Rho GTPase-activating protein 30 OS=Mus musculus OX=10090 GN=Arhgap30 PE=1 SV=3	61.55	Control_MRlabs	Control_MRlabs
Q640N1	Adipocyte enhancer-binding protein 1 OS=Mus musculus OX=10090 GN=Aebp1 PE=1 SV=1	25.41	Control_MRlabs	Control_MRlabs
Q8BG30	Negative elongation factor A OS=Mus musculus OX=10090 GN=Nelfa PE=1 SV=1	59.47	Control_MRlabs	Control_MRlabs
Q8R050	Eukaryotic peptide chain release factor GTP-binding subunit ERF3A OS=Mus musculus OX=10090 GN=Gspt1 PE=1 SV=2	156.88	Control_MRlabs	Control_MRlabs
P27671	Ras-specific guanine nucleotide-releasing factor 1 OS=Mus musculus OX=10090 GN=Rasgrf1 PE=1 SV=2	42.08	Control_MRlabs	Control_MRlabs
P47226	Testin OS=Mus musculus OX=10090 GN=Tes PE=1 SV=1	22.46	Control_MRlabs	Control_MRlabs
P17897	Lysozyme C-1 OS=Mus musculus OX=10090 GN=Lyz1 PE=1 SV=1	79.72	Control_MRlabs	Control_MRlabs
B2RQE8	Rho GTPase-activating protein 42 OS=Mus musculus OX=10090 GN=Arhgap42 PE=1 SV=1	47.53	Control_MRlabs	Control_MRlabs
Q9JLF6	Protein-glutamine gamma-glutamyltransferase K OS=Mus musculus OX=10090 GN=Tgm1 PE=1 SV=2	31.47	Control_MRlabs	Control_MRlabs
Q9QYJ1	Alpha-N-acetylgalactosaminide alpha-2,6-sialyltransferase 5 OS=Mus musculus OX=10090 GN=St6galnac5 PE=2 SV=1	62.05	Control_MRlabs	Control_MRlabs
P27664	Rod cGMP-specific 3',5'-cyclic phosphodiesterase subunit alpha OS=Mus musculus OX=10090 GN=Pde6a PE=2 SV=3	70.55	Control_MRlabs	Control_MRlabs
Q8BG18	N-terminal EF-hand calcium-binding protein 1 OS=Mus musculus OX=10090 GN=Necab1 PE=1 SV=1	199.92	Control_MRlabs	Control_MRlabs
Q640L5	Coiled-coil domain-containing protein 18 OS=Mus musculus OX=10090 GN=Ccdc18 PE=1 SV=1	66.96	Control_MRlabs	Control_MRlabs
Q8BG15	CTD small phosphatase-like protein 2 OS=Mus musculus OX=10090 GN=Ctdspl2 PE=1 SV=1	48.15	Control_MRlabs	Control_MRlabs
Q6P1Y8	Type II inositol 3,4-bisphosphate 4-phosphatase OS=Mus musculus OX=10090 GN=Inpp4b PE=2 SV=1	92.89	Control_MRlabs	Control_MRlabs
P04117	Fatty acid-binding protein, adipocyte OS=Mus musculus OX=10090 GN=Fabp4 PE=1 SV=3	33.07	Control_MRlabs	Control_MRlabs
Q9QYI3	DnaJ homolog subfamily C member 7 OS=Mus musculus OX=10090 GN=Dnajc7 PE=1 SV=2	62.74	Control_MRlabs	Control_MRlabs
P27656	Hepatic triacylglycerol lipase OS=Mus musculus OX=10090 GN=Lipc PE=2 SV=2	50.57	Control_MRlabs	Control_MRlabs
Q6NVG5	Melanoregulin OS=Mus musculus OX=10090 GN=Mreg PE=1 SV=1	13.73	Control_MRlabs	Control_MRlabs
P23298	Protein kinase C eta type OS=Mus musculus OX=10090 GN=Prkch PE=1 SV=2	92.84	Control_MRlabs	Control_MRlabs
B2RQC6	CAD protein OS=Mus musculus OX=10090 GN=Cad PE=1 SV=1	34.64	Control_MRlabs	Control_MRlabs
B2RQC2	Ubiquitin carboxyl-terminal hydrolase 42 OS=Mus musculus OX=10090 GN=Usp42 PE=1 SV=1	19.66	Control_MRlabs	Control_MRlabs
Q7TMD7	Desmoglein-4 OS=Mus musculus OX=10090 GN=Dsg4 PE=1 SV=1	41.99	Control_MRlabs	Control_MRlabs
Q9QYH9	Tumor necrosis factor ligand superfamily member 14 OS=Mus musculus OX=10090 GN=Tnfsf14 PE=2 SV=1	22.81	Control_MRlabs	Control_MRlabs
Q8BG05	Heterogeneous nuclear ribonucleoprotein A3 OS=Mus musculus OX=10090 GN=Hnrnpa3 PE=1 SV=1	47.54	Control_MRlabs	Control_MRlabs
Q9D9Q6	Calreticulin-3 OS=Mus musculus OX=10090 GN=Calr3 PE=1 SV=2	201.9	Control_MRlabs	Control_MRlabs
Q6NVF9	Cleavage and polyadenylation specificity factor subunit 6 OS=Mus musculus OX=10090 GN=Cpsf6 PE=1 SV=1	140.65	Control_MRlabs	Control_MRlabs
C0HKD9	Microfibrillar-associated protein 1B OS=Mus musculus OX=10090 GN=Mfap1b PE=1 SV=1	124.62	Control_MRlabs	Control_MRlabs
C0HKD8	Microfibrillar-associated protein 1A OS=Mus musculus OX=10090 GN=Mfap1a PE=1 SV=1	109.2	Control_MRlabs	Control_MRlabs
Q6NVF4	DNA helicase B OS=Mus musculus OX=10090 GN=Helb PE=1 SV=2	79.78	Control_MRlabs	Control_MRlabs
Q8C4H2	Sterile alpha motif domain-containing protein 3 OS=Mus musculus OX=10090 GN=Samd3 PE=2 SV=3	17.12	Control_MRlabs	Control_MRlabs
Q8CAA7	Glucose 1,6-bisphosphate synthase OS=Mus musculus OX=10090 GN=Pgm2l1 PE=1 SV=1	23.86	Control_MRlabs	Control_MRlabs
Q9JLC4	VPS10 domain-containing receptor SorCS1 OS=Mus musculus OX=10090 GN=Sorcs1 PE=1 SV=1	76.37	Control_MRlabs	Control_MRlabs
O08599	Syntaxin-binding protein 1 OS=Mus musculus OX=10090 GN=Stxbp1 PE=1 SV=2	24.57	Control_MRlabs	Control_MRlabs
Q7TMC8	L-fucose kinase OS=Mus musculus OX=10090 GN=Fuk PE=1 SV=1	32.27	Control_MRlabs	Control_MRlabs
Q9CY18	Sorting nexin-7 OS=Mus musculus OX=10090 GN=Snx7 PE=1 SV=1	39.03	Control_MRlabs	Control_MRlabs
Q8R016	Bleomycin hydrolase OS=Mus musculus OX=10090 GN=Blmh PE=1 SV=1	4.55	Control_MRlabs	Control_MRlabs
P29812	L-dopachrome tautomerase OS=Mus musculus OX=10090 GN=Dct PE=1 SV=2	105.81	Control_MRlabs	Control_MRlabs
Q6NVE8	WD repeat-containing protein 44 OS=Mus musculus OX=10090 GN=Wdr44 PE=1 SV=1	155.76	Control_MRlabs	Control_MRlabs
C0HKC9	Sperm motility kinase 3B OS=Mus musculus OX=10090 GN=Smok3b PE=2 SV=1	149.51	Control_MRlabs	Control_MRlabs
C0HKC8	Sperm motility kinase 3A OS=Mus musculus OX=10090 GN=Smok3a PE=2 SV=1	149.51	Control_MRlabs	Control_MRlabs
P48999	Arachidonate 5-lipoxygenase OS=Mus musculus OX=10090 GN=Alox5 PE=1 SV=3	90.22	Control_MRlabs	Control_MRlabs
P56593	Cytochrome P450 2A12 OS=Mus musculus OX=10090 GN=Cyp2a12 PE=1 SV=2	71.78	Control_MRlabs	Control_MRlabs
Q3TUL7	DDB1- and CUL4-associated factor 17 OS=Mus musculus OX=10090 GN=Dcaf17 PE=2 SV=1	22.15	Control_MRlabs	Control_MRlabs
A4Q9F6	Tubulin polyglutamylase TTLL13 OS=Mus musculus OX=10090 GN=Ttll13 PE=2 SV=1	106.09	Control_MRlabs	Control_MRlabs
A4Q9F4	Tubulin polyglutamylase TTLL11 OS=Mus musculus OX=10090 GN=Ttll11 PE=2 SV=1	51.66	Control_MRlabs	Control_MRlabs
Q9JLB0	MAGUK p55 subfamily member 6 OS=Mus musculus OX=10090 GN=Mpp6 PE=1 SV=1	67.54	Control_MRlabs	Control_MRlabs
Q7TMB8	Cytoplasmic FMR1-interacting protein 1 OS=Mus musculus OX=10090 GN=Cyfip1 PE=1 SV=1	35.99	Control_MRlabs	Control_MRlabs
O08586	Phosphatidylinositol 3,4,5-trisphosphate 3-phosphatase and dual-specificity protein phosphatase PTEN OS=Mus musculus OX=10090 GN=Pten PE=1 SV=1	73.85	Control_MRlabs	Control_MRlabs
Q8R007	Nectin-4 OS=Mus musculus OX=10090 GN=Nectin4 PE=2 SV=1	129.43	Control_MRlabs	Control_MRlabs
O08580	Steroid hormone receptor ERR1 OS=Mus musculus OX=10090 GN=Esrra PE=1 SV=4	84.84	Control_MRlabs	Control_MRlabs
Q96EQ9	Histone-lysine N-methyltransferase PRDM9 OS=Mus musculus OX=10090 GN=Prdm9 PE=1 SV=2	8.83	Control_MRlabs	Control_MRlabs
Q9CY00	Tetratricopeptide repeat protein 30B OS=Mus musculus OX=10090 GN=Ttc30b PE=2 SV=1	4	Control_MRlabs	Control_MRlabs
Q9QYF1	Retinol dehydrogenase 11 OS=Mus musculus OX=10090 GN=Rdh11 PE=1 SV=2	53.28	Control_MRlabs	Control_MRlabs
P48985	Protein atonal homolog 1 OS=Mus musculus OX=10090 GN=Atoh1 PE=1 SV=1	76.94	Control_MRlabs	Control_MRlabs
Q3U6K5	Spermatogenesis-associated protein 6 OS=Mus musculus OX=10090 GN=Spata6 PE=1 SV=2	69.43	Control_MRlabs	Control_MRlabs
A4Q9E8	Tubulin polyglutamylase TTLL6 OS=Mus musculus OX=10090 GN=Ttll6 PE=2 SV=1	38.88	Control_MRlabs	Control_MRlabs
A4Q9E5	Tubulin monoglycylase TTLL3 OS=Mus musculus OX=10090 GN=Ttll3 PE=1 SV=1	57.76	Control_MRlabs	Control_MRlabs
P97496	SWI/SNF complex subunit SMARCC1 OS=Mus musculus OX=10090 GN=Smarcc1 PE=1 SV=2	90.67	Control_MRlabs	Control_MRlabs
P97494	Glutamate--cysteine ligase catalytic subunit OS=Mus musculus OX=10090 GN=Gclc PE=1 SV=4	215.85	Control_MRlabs	Control_MRlabs
Q9QYE5	Protein jagged-2 OS=Mus musculus OX=10090 GN=Jag2 PE=2 SV=2	45.83	Control_MRlabs	Control_MRlabs
Q61483	Delta-like protein 1 OS=Mus musculus OX=10090 GN=Dll1 PE=1 SV=2	92.25	Control_MRlabs	Control_MRlabs
Q61481	Calcium/calmodulin-dependent 3',5'-cyclic nucleotide phosphodiesterase 1A OS=Mus musculus OX=10090 GN=Pde1a PE=1 SV=2	39.83	Control_MRlabs	Control_MRlabs
P97481	Endothelial PAS domain-containing protein 1 OS=Mus musculus OX=10090 GN=Epas1 PE=1 SV=2	62.13	Control_MRlabs	Control_MRlabs
Q9D9M2	Ubiquitin carboxyl-terminal hydrolase 12 OS=Mus musculus OX=10090 GN=Usp12 PE=2 SV=2	224.7	Control_MRlabs	Control_MRlabs
E9Q9U0	Ubiquitin carboxyl-terminal hydrolase 17-like protein B OS=Mus musculus OX=10090 GN=Usp17lb PE=1 SV=1	20.54	Control_MRlabs	Control_MRlabs
Q08481	Platelet endothelial cell adhesion molecule OS=Mus musculus OX=10090 GN=Pecam1 PE=1 SV=1	164.01	Control_MRlabs	Control_MRlabs
Q2KHI9	DNA helicase MCM9 OS=Mus musculus OX=10090 GN=Mcm9 PE=1 SV=2	176.92	Control_MRlabs	Control_MRlabs
Q61471	Protein Tob1 OS=Mus musculus OX=10090 GN=Tob1 PE=1 SV=2	117.17	Control_MRlabs	Control_MRlabs
P68510	14-3-3 protein eta OS=Mus musculus OX=10090 GN=Ywhah PE=1 SV=2	75.46	Control_MRlabs	Control_MRlabs
Q9CXL1	Transmembrane protein 50A OS=Mus musculus OX=10090 GN=Tmem50a PE=1 SV=1	30.67	Control_MRlabs	Control_MRlabs
Q9QYC0	Alpha-adducin OS=Mus musculus OX=10090 GN=Add1 PE=1 SV=2	10.35	Control_MRlabs	Control_MRlabs
Q61468	Mesothelin OS=Mus musculus OX=10090 GN=Msln PE=1 SV=1	6.71	Control_MRlabs	Control_MRlabs
Q61464	Zinc finger protein 638 OS=Mus musculus OX=10090 GN=Znf638 PE=1 SV=2	82.11	Control_MRlabs	Control_MRlabs
P97467	Peptidyl-glycine alpha-amidating monooxygenase OS=Mus musculus OX=10090 GN=Pam PE=1 SV=2	27.63	Control_MRlabs	Control_MRlabs
Q00993	Tyrosine-protein kinase receptor UFO OS=Mus musculus OX=10090 GN=Axl PE=1 SV=2	33.15	Control_MRlabs	Control_MRlabs
Q9CXK9	RNA-binding protein 33 OS=Mus musculus OX=10090 GN=Rbm33 PE=1 SV=2	34.14	Control_MRlabs	Control_MRlabs
P97464	Exostosin-1 OS=Mus musculus OX=10090 GN=Ext1 PE=1 SV=1	54.68	Control_MRlabs	Control_MRlabs
Q5SW19	Clustered mitochondria protein homolog OS=Mus musculus OX=10090 GN=Cluh PE=1 SV=2	5.22	Control_MRlabs	Control_MRlabs
B7ZNG0	Kinesin-like protein KIF7 OS=Mus musculus OX=10090 GN=Kif7 PE=1 SV=1	109.73	Control_MRlabs	Control_MRlabs
Q9D9K3	Cell death regulator Aven OS=Mus musculus OX=10090 GN=Aven PE=1 SV=2	109.62	Control_MRlabs	Control_MRlabs
O88196	E3 ubiquitin-protein ligase TTC3 OS=Mus musculus OX=10090 GN=Ttc3 PE=1 SV=2	77.97	Control_MRlabs	Control_MRlabs
Q3V0Y1	Protein PPP4R3C OS=Mus musculus OX=10090 GN=Ppp4r3c PE=2 SV=2	118.74	Control_MRlabs	Control_MRlabs
Q924X6	Low-density lipoprotein receptor-related protein 8 OS=Mus musculus OX=10090 GN=Lrp8 PE=1 SV=2	73.48	Control_MRlabs	Control_MRlabs
Q61456	Cyclin-A1 OS=Mus musculus OX=10090 GN=Ccna1 PE=1 SV=2	89.42	Control_MRlabs	Control_MRlabs
Q924X1	Epigen OS=Mus musculus OX=10090 GN=Epgn PE=2 SV=1	212.63	Control_MRlabs	Control_MRlabs
Q08460	Calcium-activated potassium channel subunit alpha-1 OS=Mus musculus OX=10090 GN=Kcnma1 PE=1 SV=2	40.58	Control_MRlabs	Control_MRlabs
P97459	Neuronal PAS domain-containing protein 1 OS=Mus musculus OX=10090 GN=Npas1 PE=1 SV=1	16.85	Control_MRlabs	Control_MRlabs
P97452	Ribosome biogenesis protein BOP1 OS=Mus musculus OX=10090 GN=Bop1 PE=1 SV=1	0.2	Control_MRlabs	Control_MRlabs
P15620	Zinc finger protein 271 OS=Mus musculus OX=10090 GN=Znf271 PE=2 SV=1	30.62	Control_MRlabs	Control_MRlabs
O08532	Voltage-dependent calcium channel subunit alpha-2/delta-1 OS=Mus musculus OX=10090 GN=Cacna2d1 PE=1 SV=1	3.97	Control_MRlabs	Control_MRlabs
Q9CXJ1	Probable glutamate--tRNA ligase, mitochondrial OS=Mus musculus OX=10090 GN=Ears2 PE=1 SV=1	5.15	Control_MRlabs	Control_MRlabs
Q924W9	Rhombotin-1 OS=Mus musculus OX=10090 GN=Lmo1 PE=2 SV=1	114.01	Control_MRlabs	Control_MRlabs
P58710	L-gulonolactone oxidase OS=Mus musculus OX=10090 GN=Gulo PE=1 SV=3	90.32	Control_MRlabs	Control_MRlabs
Q924W5	Structural maintenance of chromosomes protein 6 OS=Mus musculus OX=10090 GN=Smc6 PE=1 SV=1	64.08	Control_MRlabs	Control_MRlabs
Q8JZW4	Copine-5 OS=Mus musculus OX=10090 GN=Cpne5 PE=1 SV=1	61.76	Control_MRlabs	Control_MRlabs
O08529	Calpain-2 catalytic subunit OS=Mus musculus OX=10090 GN=Capn2 PE=1 SV=4	58.5	Control_MRlabs	Control_MRlabs
O08528	Hexokinase-2 OS=Mus musculus OX=10090 GN=Hk2 PE=1 SV=1	66.13	Control_MRlabs	Control_MRlabs
O08524	Beta-tectorin OS=Mus musculus OX=10090 GN=Tectb PE=2 SV=2	109.47	Control_MRlabs	Control_MRlabs
O08523	Alpha-tectorin OS=Mus musculus OX=10090 GN=Tecta PE=1 SV=2	59.94	Control_MRlabs	Control_MRlabs
P97440	Histone RNA hairpin-binding protein OS=Mus musculus OX=10090 GN=Slbp PE=1 SV=1	178.35	Control_MRlabs	Control_MRlabs
Q9CXI3	DBH-like monooxygenase protein 1 OS=Mus musculus OX=10090 GN=Moxd1 PE=1 SV=1	126.98	Control_MRlabs	Control_MRlabs
Q8CA95	cAMP and cAMP-inhibited cGMP 3',5'-cyclic phosphodiesterase 10A OS=Mus musculus OX=10090 GN=Pde10a PE=1 SV=2	36.41	Control_MRlabs	Control_MRlabs
P97434	Myosin phosphatase Rho-interacting protein OS=Mus musculus OX=10090 GN=Mprip PE=1 SV=2	178.14	Control_MRlabs	Control_MRlabs
Q9D9H8	UPF0565 protein C2orf69 homolog OS=Mus musculus OX=10090 PE=2 SV=3	66.69	Control_MRlabs	Control_MRlabs
P97433	Rho guanine nucleotide exchange factor 28 OS=Mus musculus OX=10090 GN=Arhgef28 PE=1 SV=1	56.58	Control_MRlabs	Control_MRlabs
A2AGH6	Mediator of RNA polymerase II transcription subunit 12 OS=Mus musculus OX=10090 GN=Med12 PE=1 SV=1	49.45	Control_MRlabs	Control_MRlabs
B0V2N1	Receptor-type tyrosine-protein phosphatase S OS=Mus musculus OX=10090 GN=Ptprs PE=1 SV=1	78.51	Control_MRlabs	Control_MRlabs
P11247	Myeloperoxidase OS=Mus musculus OX=10090 GN=Mpo PE=1 SV=2	31.33	Control_MRlabs	Control_MRlabs
Q3THK3	General transcription factor IIF subunit 1 OS=Mus musculus OX=10090 GN=Gtf2f1 PE=1 SV=2	144.26	Control_MRlabs	Control_MRlabs
Q4JIM5	Tyrosine-protein kinase ABL2 OS=Mus musculus OX=10090 GN=Abl2 PE=1 SV=1	42.36	Control_MRlabs	Control_MRlabs
O35295	Transcriptional activator protein Pur-beta OS=Mus musculus OX=10090 GN=Purb PE=1 SV=3	135.48	Control_MRlabs	Control_MRlabs
F6W8I0	YjeF N-terminal domain-containing protein 3 OS=Mus musculus OX=10090 GN=Yjefn3 PE=1 SV=2	94.17	Control_MRlabs	Control_MRlabs
Q61425	Hydroxyacyl-coenzyme A dehydrogenase, mitochondrial OS=Mus musculus OX=10090 GN=Hadh PE=1 SV=2	24.32	Control_MRlabs	Control_MRlabs
Q61423	Potassium voltage-gated channel subfamily A member 4 OS=Mus musculus OX=10090 GN=Kcna4 PE=1 SV=2	6.8	Control_MRlabs	Control_MRlabs
P46735	Unconventional myosin-Ib OS=Mus musculus OX=10090 GN=Myo1b PE=1 SV=3	38.54	Control_MRlabs	Control_MRlabs
P97427	Dihydropyrimidinase-related protein 1 OS=Mus musculus OX=10090 GN=Crmp1 PE=1 SV=1	64.64	Control_MRlabs	Control_MRlabs
Q9CXG3	Peptidyl-prolyl cis-trans isomerase-like 4 OS=Mus musculus OX=10090 GN=Ppil4 PE=1 SV=2	114.72	Control_MRlabs	Control_MRlabs
O35286	Pre-mRNA-splicing factor ATP-dependent RNA helicase DHX15 OS=Mus musculus OX=10090 GN=Dhx15 PE=1 SV=2	28.4	Control_MRlabs	Control_MRlabs
Q924T7	E3 ubiquitin-protein ligase RNF31 OS=Mus musculus OX=10090 GN=Rnf31 PE=1 SV=2	81.85	Control_MRlabs	Control_MRlabs
Q61419	Cytidine monophosphate-N-acetylneuraminic acid hydroxylase OS=Mus musculus OX=10090 GN=Cmah PE=1 SV=1	70.44	Control_MRlabs	Control_MRlabs
Q61418	H(+)/Cl(-) exchange transporter 4 OS=Mus musculus OX=10090 GN=Clcn4 PE=2 SV=2	64.94	Control_MRlabs	Control_MRlabs
P56501	Mitochondrial uncoupling protein 3 OS=Mus musculus OX=10090 GN=Ucp3 PE=1 SV=1	34.51	Control_MRlabs	Control_MRlabs
Q08423	Trefoil factor 1 OS=Mus musculus OX=10090 GN=Tff1 PE=2 SV=1	44.15	Control_MRlabs	Control_MRlabs
Q2HXL6	ER degradation-enhancing alpha-mannosidase-like protein 3 OS=Mus musculus OX=10090 GN=Edem3 PE=1 SV=2	58.24	Control_MRlabs	Control_MRlabs
Q9JKX4	Protein AATF OS=Mus musculus OX=10090 GN=Aatf PE=1 SV=1	62.85	Control_MRlabs	Control_MRlabs
P97414	Potassium voltage-gated channel subfamily KQT member 1 OS=Mus musculus OX=10090 GN=Kcnq1 PE=1 SV=3	54.51	Control_MRlabs	Control_MRlabs
Q9D9F8	Mirror-image polydactyly gene 1 protein homolog OS=Mus musculus OX=10090 GN=Mipol1 PE=2 SV=1	157.23	Control_MRlabs	Control_MRlabs
Q9CXF7	Chromodomain-helicase-DNA-binding protein 1-like OS=Mus musculus OX=10090 GN=Chd1l PE=1 SV=1	64.91	Control_MRlabs	Control_MRlabs
Q5BLK4	Terminal uridylyltransferase 7 OS=Mus musculus OX=10090 GN=Zcchc6 PE=1 SV=3	163.21	Control_MRlabs	Control_MRlabs
Q3V0T4	Integrin alpha-D OS=Mus musculus OX=10090 GN=Itgad PE=1 SV=1	53.98	Control_MRlabs	Control_MRlabs
Q924S8	Sprouty-related, EVH1 domain-containing protein 1 OS=Mus musculus OX=10090 GN=Spred1 PE=1 SV=1	74.39	Control_MRlabs	Control_MRlabs
Q924S7	Sprouty-related, EVH1 domain-containing protein 2 OS=Mus musculus OX=10090 GN=Spred2 PE=1 SV=1	86.21	Control_MRlabs	Control_MRlabs
Q61409	cGMP-inhibited 3',5'-cyclic phosphodiesterase B OS=Mus musculus OX=10090 GN=Pde3b PE=1 SV=2	113.8	Control_MRlabs	Control_MRlabs
Q8JZS6	NEDD4-binding protein 2-like 2 OS=Mus musculus OX=10090 GN=N4bp2l2 PE=2 SV=2	31.5	Control_MRlabs	Control_MRlabs
B1AUR6	Protein MMS22-like OS=Mus musculus OX=10090 GN=Mms22l PE=1 SV=1	49.34	Control_MRlabs	Control_MRlabs
P46718	Programmed cell death protein 2 OS=Mus musculus OX=10090 GN=Pdcd2 PE=2 SV=2	53.66	Control_MRlabs	Control_MRlabs
B2RPV6	Multimerin-1 OS=Mus musculus OX=10090 GN=Mmrn1 PE=1 SV=2	61.32	Control_MRlabs	Control_MRlabs
Q8JZR6	Electroneutral sodium bicarbonate exchanger 1 OS=Mus musculus OX=10090 GN=Slc4a8 PE=2 SV=1	75.12	Control_MRlabs	Control_MRlabs
Q8JZR0	Long-chain-fatty-acid--CoA ligase 5 OS=Mus musculus OX=10090 GN=Acsl5 PE=1 SV=1	124.84	Control_MRlabs	Control_MRlabs
Q9JL70	Fanconi anemia group A protein homolog OS=Mus musculus OX=10090 GN=Fanca PE=2 SV=2	59.46	Control_MRlabs	Control_MRlabs
Q9CXD9	Leucine-rich repeat-containing protein 17 OS=Mus musculus OX=10090 GN=Lrrc17 PE=2 SV=1	14.95	Control_MRlabs	Control_MRlabs
G3X912	SprT-like domain-containing protein Spartan OS=Mus musculus OX=10090 GN=Sprtn PE=2 SV=1	100.33	Control_MRlabs	Control_MRlabs
Q3THG9	Alanyl-tRNA editing protein Aarsd1 OS=Mus musculus OX=10090 GN=Aarsd1 PE=1 SV=2	76.82	Control_MRlabs	Control_MRlabs
Q9QXZ6	Solute carrier organic anion transporter family member 1A1 OS=Mus musculus OX=10090 GN=Slco1a1 PE=1 SV=1	18.95	Control_MRlabs	Control_MRlabs
Q3V132	ADP/ATP translocase 4 OS=Mus musculus OX=10090 GN=Slc25a31 PE=1 SV=1	13.29	Control_MRlabs	Control_MRlabs
Q9JKU8	LIM homeobox transcription factor 1-alpha OS=Mus musculus OX=10090 GN=Lmx1a PE=2 SV=1	47.06	Control_MRlabs	Control_MRlabs
Q9JL61	DNA-binding protein Rfx5 OS=Mus musculus OX=10090 GN=Rfx5 PE=1 SV=2	61.11	Control_MRlabs	Control_MRlabs
Q9QXY7	Membrane transport protein XK OS=Mus musculus OX=10090 GN=Xk PE=1 SV=1	31.13	Control_MRlabs	Control_MRlabs
Q9CXC3	Mitochondrial genome maintenance exonuclease 1 OS=Mus musculus OX=10090 GN=Mgme1 PE=2 SV=1	10.65	Control_MRlabs	Control_MRlabs
Q3V129	Serine/threonine-protein kinase ULK4 OS=Mus musculus OX=10090 GN=Ulk4 PE=1 SV=2	42.59	Control_MRlabs	Control_MRlabs
Q9QXY1	Tight junction protein ZO-3 OS=Mus musculus OX=10090 GN=Tjp3 PE=1 SV=1	89.78	Control_MRlabs	Control_MRlabs
Q3UP24	NLR family CARD domain-containing protein 4 OS=Mus musculus OX=10090 GN=Nlrc4 PE=1 SV=1	67.62	Control_MRlabs	Control_MRlabs
Q8JZP9	GAS2-like protein 1 OS=Mus musculus OX=10090 GN=Gas2l1 PE=1 SV=1	16.3	Control_MRlabs	Control_MRlabs
O35245	Polycystin-2 OS=Mus musculus OX=10090 GN=Pkd2 PE=1 SV=2	112.69	Control_MRlabs	Control_MRlabs
O35242	Protein FAN OS=Mus musculus OX=10090 GN=Nsmaf PE=1 SV=2	15.17	Control_MRlabs	Control_MRlabs
Q9JKT3	Taste receptor type 2 member 4 OS=Mus musculus OX=10090 GN=Tas2r4 PE=1 SV=1	79.39	Control_MRlabs	Control_MRlabs
P81068	Iroquois-class homeodomain protein IRX-1 OS=Mus musculus OX=10090 GN=Irx1 PE=1 SV=4	14.12	Control_MRlabs	Control_MRlabs
Q9QXX8	Nuclear fragile X mental retardation-interacting protein 1 OS=Mus musculus OX=10090 GN=Nufip1 PE=1 SV=1	57.05	Control_MRlabs	Control_MRlabs
Q32MW3	Acyl-coenzyme A thioesterase 10, mitochondrial OS=Mus musculus OX=10090 GN=Acot10 PE=2 SV=1	28.11	Control_MRlabs	Control_MRlabs
Q8C3X8	Lipase maturation factor 2 OS=Mus musculus OX=10090 GN=Lmf2 PE=1 SV=1	75.75	Control_MRlabs	Control_MRlabs
Q9QXX0	Protein jagged-1 OS=Mus musculus OX=10090 GN=Jag1 PE=1 SV=1	53.87	Control_MRlabs	Control_MRlabs
Q8BS95	Golgi pH regulator OS=Mus musculus OX=10090 GN=Gpr89a PE=1 SV=2	45.02	Control_MRlabs	Control_MRlabs
Q3V0P1	CPX chromosomal region candidate gene 1 protein homolog OS=Mus musculus OX=10090 GN=Cpxcr1 PE=2 SV=2	41.49	Control_MRlabs	Control_MRlabs
O35231	Kinesin-like protein KIFC3 OS=Mus musculus OX=10090 GN=Kifc3 PE=1 SV=4	74.98	Control_MRlabs	Control_MRlabs
Q6NV72	WD repeat and coiled-coil-containing protein OS=Mus musculus OX=10090 GN=Wdcp PE=2 SV=2	9.05	Control_MRlabs	Control_MRlabs
P40142	Transketolase OS=Mus musculus OX=10090 GN=Tkt PE=1 SV=1	5.25	Control_MRlabs	Control_MRlabs
Q60996	Serine/threonine-protein phosphatase 2A 56 kDa regulatory subunit gamma isoform OS=Mus musculus OX=10090 GN=Ppp2r5c PE=1 SV=2	32	Control_MRlabs	Control_MRlabs
Q60990	RNA-binding motif protein, Y chromosome, family 1 member B OS=Mus musculus OX=10090 GN=Rbmy1b PE=2 SV=3	84.02	Control_MRlabs	Control_MRlabs
Q2WG77	Protein ripply1 OS=Mus musculus OX=10090 GN=Ripply1 PE=2 SV=1	217.01	Control_MRlabs	Control_MRlabs
Q6P1H6	Ankyrin repeat and LEM domain-containing protein 2 OS=Mus musculus OX=10090 GN=Ankle2 PE=1 SV=2	87.84	Control_MRlabs	Control_MRlabs
Q9QXW0	F-box/LRR-repeat protein 6 OS=Mus musculus OX=10090 GN=Fbxl6 PE=2 SV=2	8.26	Control_MRlabs	Control_MRlabs
Q8QZY9	Splicing factor 3B subunit 4 OS=Mus musculus OX=10090 GN=Sf3b4 PE=1 SV=1	47.16	Control_MRlabs	Control_MRlabs
Q924N4	Solute carrier family 12 member 6 OS=Mus musculus OX=10090 GN=Slc12a6 PE=1 SV=2	8.04	Control_MRlabs	Control_MRlabs
Q8QZY1	Eukaryotic translation initiation factor 3 subunit L OS=Mus musculus OX=10090 GN=Eif3l PE=1 SV=1	35.97	Control_MRlabs	Control_MRlabs
Q9JKR6	Hypoxia up-regulated protein 1 OS=Mus musculus OX=10090 GN=Hyou1 PE=1 SV=1	127.05	Control_MRlabs	Control_MRlabs
Q60988	SCL-interrupting locus protein homolog OS=Mus musculus OX=10090 GN=Stil PE=1 SV=1	77.24	Control_MRlabs	Control_MRlabs
Q60987	Forkhead box protein G1 OS=Mus musculus OX=10090 GN=Foxg1 PE=1 SV=1	23.55	Control_MRlabs	Control_MRlabs
O35219	Potassium voltage-gated channel subfamily H member 2 OS=Mus musculus OX=10090 GN=Kcnh2 PE=1 SV=2	52.55	Control_MRlabs	Control_MRlabs
O35218	Cleavage and polyadenylation specificity factor subunit 2 OS=Mus musculus OX=10090 GN=Cpsf2 PE=1 SV=1	138.86	Control_MRlabs	Control_MRlabs
Q924M7	Mannose-6-phosphate isomerase OS=Mus musculus OX=10090 GN=Mpi PE=1 SV=1	112.92	Control_MRlabs	Control_MRlabs
P12970	60S ribosomal protein L7a OS=Mus musculus OX=10090 GN=Rpl7a PE=1 SV=2	36.94	Control_MRlabs	Control_MRlabs
Q50H33	BTB/POZ domain-containing protein KCTD8 OS=Mus musculus OX=10090 GN=Kctd8 PE=1 SV=1	178.45	Control_MRlabs	Control_MRlabs
P16092	Fibroblast growth factor receptor 1 OS=Mus musculus OX=10090 GN=Fgfr1 PE=1 SV=2	33.21	Control_MRlabs	Control_MRlabs
Q9JKQ4	Iroquois-class homeodomain protein IRX-5 OS=Mus musculus OX=10090 GN=Irx5 PE=2 SV=1	74.64	Control_MRlabs	Control_MRlabs
Q9JL21	C-C chemokine receptor type 10 OS=Mus musculus OX=10090 GN=Ccr10 PE=1 SV=2	25.8	Control_MRlabs	Control_MRlabs
P28047	Protein Wnt-7b OS=Mus musculus OX=10090 GN=Wnt7b PE=1 SV=1	26.28	Control_MRlabs	Control_MRlabs
Q9QY61	Iroquois-class homeodomain protein IRX-4 OS=Mus musculus OX=10090 GN=Irx4 PE=2 SV=1	56.35	Control_MRlabs	Control_MRlabs
O35205	Granzyme K OS=Mus musculus OX=10090 GN=Gzmk PE=3 SV=1	34.37	Control_MRlabs	Control_MRlabs
Q3V0M2	Leucine-rich repeat-containing protein 36 OS=Mus musculus OX=10090 GN=Lrrc36 PE=1 SV=2	51.53	Control_MRlabs	Control_MRlabs
P12960	Contactin-1 OS=Mus musculus OX=10090 GN=Cntn1 PE=1 SV=1	16.54	Control_MRlabs	Control_MRlabs
P59178	Lethal(3)malignant brain tumor-like protein 2 OS=Mus musculus OX=10090 GN=L3mbtl2 PE=1 SV=2	72.12	Control_MRlabs	Control_MRlabs
Q60963	Platelet-activating factor acetylhydrolase OS=Mus musculus OX=10090 GN=Pla2g7 PE=2 SV=2	37.75	Control_MRlabs	Control_MRlabs
Q9QXT9	Zinc finger protein 354B OS=Mus musculus OX=10090 GN=Znf354b PE=2 SV=1	110.71	Control_MRlabs	Control_MRlabs
Q6P1E8	EF-hand calcium-binding domain-containing protein 6 OS=Mus musculus OX=10090 GN=Efcab6 PE=1 SV=2	73.68	Control_MRlabs	Control_MRlabs
Q5M6W3	Clathrin heavy chain linker domain-containing protein 1 OS=Mus musculus OX=10090 GN=Clhc1 PE=2 SV=1	203.44	Control_MRlabs	Control_MRlabs
Q9QY53	Nephrocystin-1 OS=Mus musculus OX=10090 GN=Nphp1 PE=1 SV=1	134.31	Control_MRlabs	Control_MRlabs
Q99NI3	General transcription factor II-I repeat domain-containing protein 2 OS=Mus musculus OX=10090 GN=Gtf2ird2 PE=2 SV=1	37.67	Control_MRlabs	Control_MRlabs
Q3V0L5	Leucine-rich repeat-containing protein 43 OS=Mus musculus OX=10090 GN=Lrrc43 PE=2 SV=1	36.41	Control_MRlabs	Control_MRlabs
Q75NR7	ATP-dependent DNA helicase Q4 OS=Mus musculus OX=10090 GN=Recql4 PE=2 SV=2	67.85	Control_MRlabs	Control_MRlabs
Q8QZV7	Integrator complex subunit 13 OS=Mus musculus OX=10090 GN=IntS13 PE=1 SV=2	64.52	Control_MRlabs	Control_MRlabs
Q8QZV6	Protein FAM161A OS=Mus musculus OX=10090 GN=Fam161a PE=1 SV=1	70.73	Control_MRlabs	Control_MRlabs
Q8BRT1	CLIP-associating protein 2 OS=Mus musculus OX=10090 GN=Clasp2 PE=1 SV=1	56.45	Control_MRlabs	Control_MRlabs
Q3TTY0	Phospholipase B1, membrane-associated OS=Mus musculus OX=10090 GN=Plb1 PE=1 SV=2	29.48	Control_MRlabs	Control_MRlabs
P28028	Serine/threonine-protein kinase B-raf OS=Mus musculus OX=10090 GN=Braf PE=1 SV=3	16.24	Control_MRlabs	Control_MRlabs
P61460	GATOR complex protein DEPDC5 OS=Mus musculus OX=10090 GN=Depdc5 PE=1 SV=2	31.23	Control_MRlabs	Control_MRlabs
P22727	Protein Wnt-6 OS=Mus musculus OX=10090 GN=Wnt6 PE=1 SV=2	36.56	Control_MRlabs	Control_MRlabs
Q3V0K9	Plastin-1 OS=Mus musculus OX=10090 GN=Pls1 PE=1 SV=1	80.65	Control_MRlabs	Control_MRlabs
Q6P1D5	Seizure 6-like protein OS=Mus musculus OX=10090 GN=Sez6l PE=1 SV=1	65.22	Control_MRlabs	Control_MRlabs
P51682	C-C chemokine receptor type 5 OS=Mus musculus OX=10090 GN=Ccr5 PE=2 SV=3	100.45	Control_MRlabs	Control_MRlabs
Q60948	Max dimerization protein 4 OS=Mus musculus OX=10090 GN=Mxd4 PE=1 SV=1	121.92	Control_MRlabs	Control_MRlabs
Q9QY39	PDZ domain-containing protein 4 OS=Mus musculus OX=10090 GN=Pdzd4 PE=2 SV=2	47.4	Control_MRlabs	Control_MRlabs
Q6P1C1	Inositol-pentakisphosphate 2-kinase OS=Mus musculus OX=10090 GN=Ippk PE=1 SV=1	38.69	Control_MRlabs	Control_MRlabs
Q8C437	PEX5-related protein OS=Mus musculus OX=10090 GN=Pex5l PE=1 SV=2	50.44	Control_MRlabs	Control_MRlabs
Q99NG0	Helicase ARIP4 OS=Mus musculus OX=10090 GN=Rad54l2 PE=1 SV=1	49.88	Control_MRlabs	Control_MRlabs
P10751	Zinc finger protein 11 OS=Mus musculus OX=10090 GN=Zfp11 PE=2 SV=2	6.77	Control_MRlabs	Control_MRlabs
Q60936	Atypical kinase COQ8A, mitochondrial OS=Mus musculus OX=10090 GN=Coq8a PE=1 SV=2	36.04	Control_MRlabs	Control_MRlabs
Q60934	Glutamate receptor ionotropic, kainate 1 OS=Mus musculus OX=10090 GN=Grik1 PE=2 SV=2	45.13	Control_MRlabs	Control_MRlabs
P51661	Corticosteroid 11-beta-dehydrogenase isozyme 2 OS=Mus musculus OX=10090 GN=Hsd11b2 PE=1 SV=2	11.32	Control_MRlabs	Control_MRlabs
Q6P1B1	Xaa-Pro aminopeptidase 1 OS=Mus musculus OX=10090 GN=Xpnpep1 PE=1 SV=1	51.45	Control_MRlabs	Control_MRlabs
Q924H9	ATP-dependent RNA helicase DQX1 OS=Mus musculus OX=10090 GN=Dqx1 PE=2 SV=1	48.68	Control_MRlabs	Control_MRlabs
Q60928	Glutathione hydrolase 1 proenzyme OS=Mus musculus OX=10090 GN=Ggt1 PE=1 SV=1	14.11	Control_MRlabs	Control_MRlabs
Q9JKL1	Prokineticin receptor 1 OS=Mus musculus OX=10090 GN=Prokr1 PE=2 SV=2	291.26	Control_MRlabs	Control_MRlabs
Q99NE5	Regulating synaptic membrane exocytosis protein 1 OS=Mus musculus OX=10090 GN=Rims1 PE=1 SV=2	55.48	Control_MRlabs	Control_MRlabs
Q8QZR1	Tyrosine aminotransferase OS=Mus musculus OX=10090 GN=Tat PE=1 SV=1	92.59	Control_MRlabs	Control_MRlabs
Q9CWX9	Probable ATP-dependent RNA helicase DDX47 OS=Mus musculus OX=10090 GN=Ddx47 PE=2 SV=2	48.47	Control_MRlabs	Control_MRlabs
Q9CX97	WD repeat-containing protein 55 OS=Mus musculus OX=10090 GN=Wdr55 PE=1 SV=2	101	Control_MRlabs	Control_MRlabs
Q9D8X1	Copper homeostasis protein cutC homolog OS=Mus musculus OX=10090 GN=Cutc PE=1 SV=1	8.36	Control_MRlabs	Control_MRlabs
E9Q9A9	2'-5'-oligoadenylate synthase 2 OS=Mus musculus OX=10090 GN=Oas2 PE=1 SV=1	37.2	Control_MRlabs	Control_MRlabs
Q9QY01	Serine/threonine-protein kinase ULK2 OS=Mus musculus OX=10090 GN=Ulk2 PE=1 SV=1	45.79	Control_MRlabs	Control_MRlabs
Q80ZV0	Ribonuclease H2 subunit B OS=Mus musculus OX=10090 GN=Rnaseh2b PE=1 SV=2	11.25	Control_MRlabs	Control_MRlabs
P59114	Phosphorylated CTD-interacting factor 1 OS=Mus musculus OX=10090 GN=Pcif1 PE=1 SV=1	63.34	Control_MRlabs	Control_MRlabs
P59113	Fermitin family homolog 1 OS=Mus musculus OX=10090 GN=Fermt1 PE=1 SV=4	14.31	Control_MRlabs	Control_MRlabs
P59111	Potassium voltage-gated channel subfamily H member 8 OS=Mus musculus OX=10090 GN=Kcnh8 PE=2 SV=2	89.1	Control_MRlabs	Control_MRlabs
P59110	Sentrin-specific protease 1 OS=Mus musculus OX=10090 GN=Senp1 PE=1 SV=1	40.27	Control_MRlabs	Control_MRlabs
Q9D8W5	26S proteasome non-ATPase regulatory subunit 12 OS=Mus musculus OX=10090 GN=Psmd12 PE=1 SV=4	112.37	Control_MRlabs	Control_MRlabs
Q9QXN0	Protein Shroom3 OS=Mus musculus OX=10090 GN=Shroom3 PE=1 SV=2	47.17	Control_MRlabs	Control_MRlabs
Q96DY5	RING finger protein 112 OS=Mus musculus OX=10090 GN=Rnf112 PE=2 SV=1	20.47	Control_MRlabs	Control_MRlabs
Q99NC0	Transcription cofactor vestigial-like protein 1 OS=Mus musculus OX=10090 GN=Vgll1 PE=1 SV=1	54.01	Control_MRlabs	Control_MRlabs
P08414	Calcium/calmodulin-dependent protein kinase type IV OS=Mus musculus OX=10090 GN=Camk4 PE=1 SV=2	63.13	Control_MRlabs	Control_MRlabs
Q64012	RNA-binding protein Raly OS=Mus musculus OX=10090 GN=Raly PE=1 SV=3	1.77	Control_MRlabs	Control_MRlabs
Q05722	Collagen alpha-1(IX) chain OS=Mus musculus OX=10090 GN=Col9a1 PE=2 SV=2	20.33	Control_MRlabs	Control_MRlabs
Q9CWV1	DNA helicase MCM8 OS=Mus musculus OX=10090 GN=Mcm8 PE=1 SV=3	4.96	Control_MRlabs	Control_MRlabs
Q9QXM0	Monoacylglycerol lipase ABHD2 OS=Mus musculus OX=10090 GN=Abhd2 PE=1 SV=1	61.09	Control_MRlabs	Control_MRlabs
Q99NB1	Acetyl-coenzyme A synthetase 2-like, mitochondrial OS=Mus musculus OX=10090 GN=Acss1 PE=1 SV=1	25.05	Control_MRlabs	Control_MRlabs
Q3V0E1	Uncharacterized protein C9orf131 homolog OS=Mus musculus OX=10090 PE=2 SV=1	50.35	Control_MRlabs	Control_MRlabs
P0C871	Cytosolic phospholipase A2 beta OS=Mus musculus OX=10090 GN=Pla2g4b PE=2 SV=1	41.46	Control_MRlabs	Control_MRlabs
Q8BRM2	RAB6-interacting golgin OS=Mus musculus OX=10090 GN=Gorab PE=1 SV=1	14.06	Control_MRlabs	Control_MRlabs
Q5H8B9	FRAS1-related extracellular matrix protein 3 OS=Mus musculus OX=10090 GN=Frem3 PE=2 SV=2	27.18	Control_MRlabs	Control_MRlabs
Q9D8U6	Mast cell-expressed membrane protein 1 OS=Mus musculus OX=10090 GN=Mcemp1 PE=2 SV=1	92.49	Control_MRlabs	Control_MRlabs
Q9QXL8	Nucleoside diphosphate kinase 7 OS=Mus musculus OX=10090 GN=Nme7 PE=1 SV=1	56.73	Control_MRlabs	Control_MRlabs
Q9D8U4	Complement C1q tumor necrosis factor-related protein 2 OS=Mus musculus OX=10090 GN=C1qtnf2 PE=1 SV=1	151.16	Control_MRlabs	Control_MRlabs
Q80ZS3	28S ribosomal protein S26, mitochondrial OS=Mus musculus OX=10090 GN=Mrps26 PE=1 SV=1	29.47	Control_MRlabs	Control_MRlabs
Q30KM9	Beta-defensin 43 OS=Mus musculus OX=10090 GN=Defb43 PE=3 SV=1	273.34	Control_MRlabs	Control_MRlabs
P51612	DNA repair protein complementing XP-C cells homolog OS=Mus musculus OX=10090 GN=Xpc PE=1 SV=2	89.28	Control_MRlabs	Control_MRlabs
Q924C6	Lysyl oxidase homolog 4 OS=Mus musculus OX=10090 GN=Loxl4 PE=2 SV=2	42.08	Control_MRlabs	Control_MRlabs
Q8C3L1	Protein SSUH2 homolog OS=Mus musculus OX=10090 GN=Ssuh2 PE=1 SV=1	10.78	Control_MRlabs	Control_MRlabs
P29758	Ornithine aminotransferase, mitochondrial OS=Mus musculus OX=10090 GN=Oat PE=1 SV=1	88.22	Control_MRlabs	Control_MRlabs
Q11127	Alpha-(1,3)-fucosyltransferase 4 OS=Mus musculus OX=10090 GN=Fut4 PE=2 SV=1	30.4	Control_MRlabs	Control_MRlabs
Q9QXK3	Coatomer subunit gamma-2 OS=Mus musculus OX=10090 GN=Copg2 PE=1 SV=1	18.12	Control_MRlabs	Control_MRlabs
Q8BRK9	Alpha-mannosidase 2x OS=Mus musculus OX=10090 GN=Man2a2 PE=1 SV=2	27.73	Control_MRlabs	Control_MRlabs
A2AG50	MAP7 domain-containing protein 2 OS=Mus musculus OX=10090 GN=Map7d2 PE=1 SV=1	55.7	Control_MRlabs	Control_MRlabs
Q3TGW2	Endonuclease/exonuclease/phosphatase family domain-containing protein 1 OS=Mus musculus OX=10090 GN=Eepd1 PE=1 SV=1	95.46	Control_MRlabs	Control_MRlabs
Q3V0C1	Zinc finger matrin-type protein 1 OS=Mus musculus OX=10090 GN=Zmat1 PE=1 SV=2	43.76	Control_MRlabs	Control_MRlabs
J3S6Y1	Thrombospondin-type laminin G domain and EAR repeat-containing protein OS=Mus musculus OX=10090 GN=Tspear PE=1 SV=1	42.45	Control_MRlabs	Control_MRlabs
Q01341	Adenylate cyclase type 6 OS=Mus musculus OX=10090 GN=Adcy6 PE=1 SV=1	83.63	Control_MRlabs	Control_MRlabs
Q9QXJ1	Amyloid-beta A4 precursor protein-binding family B member 1 OS=Mus musculus OX=10090 GN=Apbb1 PE=1 SV=3	77.09	Control_MRlabs	Control_MRlabs
Q8C3J5	Dedicator of cytokinesis protein 2 OS=Mus musculus OX=10090 GN=Dock2 PE=1 SV=3	80.16	Control_MRlabs	Control_MRlabs
Q01338	Alpha-2A adrenergic receptor OS=Mus musculus OX=10090 GN=Adra2a PE=1 SV=1	15.28	Control_MRlabs	Control_MRlabs
A8VU90	Ankyrin repeat and LEM domain-containing protein 1 OS=Mus musculus OX=10090 GN=Ankle1 PE=2 SV=1	52.98	Control_MRlabs	Control_MRlabs
Q9JKE2	Triggering receptor expressed on myeloid cells 1 OS=Mus musculus OX=10090 GN=Trem1 PE=1 SV=1	43.55	Control_MRlabs	Control_MRlabs
Q5SV85	Synergin gamma OS=Mus musculus OX=10090 GN=Synrg PE=1 SV=1	69.81	Control_MRlabs	Control_MRlabs
Q9CX34	Protein SGT1 homolog OS=Mus musculus OX=10090 GN=Sugt1 PE=1 SV=3	57.72	Control_MRlabs	Control_MRlabs
Q0GGX2	Zinc finger protein 541 OS=Mus musculus OX=10090 GN=Znf541 PE=1 SV=1	42.61	Control_MRlabs	Control_MRlabs
Q9CWR2	Histone-lysine N-methyltransferase SMYD3 OS=Mus musculus OX=10090 GN=Smyd3 PE=2 SV=1	97.38	Control_MRlabs	Control_MRlabs
Q8C3I9	Deleted in autism-related protein 1 homolog OS=Mus musculus OX=10090 PE=2 SV=1	1.71	Control_MRlabs	Control_MRlabs
Q9JKD9	Zinc finger and BTB domain-containing protein 32 OS=Mus musculus OX=10090 GN=Zbtb32 PE=1 SV=1	19.16	Control_MRlabs	Control_MRlabs
Q01320	DNA topoisomerase 2-alpha OS=Mus musculus OX=10090 GN=Top2a PE=1 SV=2	157.15	Control_MRlabs	Control_MRlabs
Q5SV77	Gametogenetin-binding protein 2 OS=Mus musculus OX=10090 GN=Ggnbp2 PE=1 SV=1	139.21	Control_MRlabs	Control_MRlabs
Q5SUV5	Myosin light chain kinase family member 4 OS=Mus musculus OX=10090 GN=Mylk4 PE=1 SV=2	86.96	Control_MRlabs	Control_MRlabs
Q9D924	Iron-sulfur cluster assembly 1 homolog, mitochondrial OS=Mus musculus OX=10090 GN=Isca1 PE=2 SV=1	53.1	Control_MRlabs	Control_MRlabs
P27545	Ceramide synthase 1 OS=Mus musculus OX=10090 GN=Cers1 PE=1 SV=1	102.39	Control_MRlabs	Control_MRlabs
P58682	Toll-like receptor 8 OS=Mus musculus OX=10090 GN=Tlr8 PE=1 SV=2	49.45	Control_MRlabs	Control_MRlabs
Q8BRH3	Rho GTPase-activating protein 19 OS=Mus musculus OX=10090 GN=Arhgap19 PE=1 SV=2	53.48	Control_MRlabs	Control_MRlabs
P23188	Furin OS=Mus musculus OX=10090 GN=Furin PE=1 SV=2	63.94	Control_MRlabs	Control_MRlabs
Q9JKC6	Cell cycle exit and neuronal differentiation protein 1 OS=Mus musculus OX=10090 GN=Cend1 PE=1 SV=1	191.51	Control_MRlabs	Control_MRlabs
Q9CWP6	Motile sperm domain-containing protein 2 OS=Mus musculus OX=10090 GN=Mospd2 PE=1 SV=2	113.66	Control_MRlabs	Control_MRlabs
Q9QXG2	Rab proteins geranylgeranyltransferase component A 1 OS=Mus musculus OX=10090 GN=Chm PE=1 SV=1	53.05	Control_MRlabs	Control_MRlabs
E9PX95	ATP-binding cassette sub-family A member 17 OS=Mus musculus OX=10090 GN=Abca17 PE=1 SV=1	55.72	Control_MRlabs	Control_MRlabs
Q66JY2	INO80 complex subunit D OS=Mus musculus OX=10090 GN=Ino80d PE=2 SV=3	74.71	Control_MRlabs	Control_MRlabs
Q9D906	Ubiquitin-like modifier-activating enzyme ATG7 OS=Mus musculus OX=10090 GN=Atg7 PE=1 SV=1	73.6	Control_MRlabs	Control_MRlabs
Q99MZ6	Unconventional myosin-VIIb OS=Mus musculus OX=10090 GN=Myo7b PE=1 SV=3	60.99	Control_MRlabs	Control_MRlabs
P58660	Caspase recruitment domain-containing protein 10 OS=Mus musculus OX=10090 GN=Card10 PE=1 SV=1	59.82	Control_MRlabs	Control_MRlabs
P97399	Dentin sialophosphoprotein OS=Mus musculus OX=10090 GN=Dspp PE=1 SV=2	70.86	Control_MRlabs	Control_MRlabs
P97391	Calcium-dependent phospholipase A2 OS=Mus musculus OX=10090 GN=Pla2g5 PE=2 SV=2	87.64	Control_MRlabs	Control_MRlabs
Q9QXE7	F-box-like/WD repeat-containing protein TBL1X OS=Mus musculus OX=10090 GN=Tbl1x PE=1 SV=2	53.01	Control_MRlabs	Control_MRlabs
P60954	Nucleolar protein 4 OS=Mus musculus OX=10090 GN=Nol4 PE=2 SV=2	29.56	Control_MRlabs	Control_MRlabs
Q9QXE0	2-hydroxyacyl-CoA lyase 1 OS=Mus musculus OX=10090 GN=Hacl1 PE=1 SV=2	8.12	Control_MRlabs	Control_MRlabs
P56477	Interferon regulatory factor 5 OS=Mus musculus OX=10090 GN=Irf5 PE=1 SV=1	17.36	Control_MRlabs	Control_MRlabs
P56475	Gamma-aminobutyric acid receptor subunit rho-1 OS=Mus musculus OX=10090 GN=Gabrr1 PE=2 SV=2	67.38	Control_MRlabs	Control_MRlabs
Q4VGL6	Roquin-1 OS=Mus musculus OX=10090 GN=Rc3h1 PE=1 SV=1	40.03	Control_MRlabs	Control_MRlabs
Q65CL1	Catenin alpha-3 OS=Mus musculus OX=10090 GN=Ctnna3 PE=1 SV=2	78.55	Control_MRlabs	Control_MRlabs
Q9D8M7	PHD finger protein 10 OS=Mus musculus OX=10090 GN=Phf10 PE=1 SV=4	75.02	Control_MRlabs	Control_MRlabs
Q149S1	Tektin-4 OS=Mus musculus OX=10090 GN=Tekt4 PE=1 SV=1	41.79	Control_MRlabs	Control_MRlabs
Q99MX7	Transmembrane protein 121B OS=Mus musculus OX=10090 GN=Tmem121b PE=1 SV=1	238.24	Control_MRlabs	Control_MRlabs
P0C7M9	C-type lectin domain family 2 member L OS=Mus musculus OX=10090 GN=Clec2l PE=1 SV=1	0.67	Control_MRlabs	Control_MRlabs
Q99N93	39S ribosomal protein L16, mitochondrial OS=Mus musculus OX=10090 GN=Mrpl16 PE=1 SV=1	46.31	Control_MRlabs	Control_MRlabs
Q66JV4	RNA-binding protein 12B-B OS=Mus musculus OX=10090 GN=Rbm12b2 PE=2 SV=2	50.93	Control_MRlabs	Control_MRlabs
Q923Z0	G-protein coupled receptor family C group 5 member B OS=Mus musculus OX=10090 GN=Gprc5b PE=1 SV=1	94.09	Control_MRlabs	Control_MRlabs
P25322	G1/S-specific cyclin-D1 OS=Mus musculus OX=10090 GN=Ccnd1 PE=1 SV=1	34.89	Control_MRlabs	Control_MRlabs
Q61371	Intraflagellar transport protein 88 homolog OS=Mus musculus OX=10090 GN=Ift88 PE=1 SV=2	83.18	Control_MRlabs	Control_MRlabs
P97378	Interleukin-12 receptor subunit beta-2 OS=Mus musculus OX=10090 GN=Il12rb2 PE=1 SV=1	82.91	Control_MRlabs	Control_MRlabs
Q66X05	NACHT, LRR and PYD domains-containing protein 4F OS=Mus musculus OX=10090 GN=Nlrp4f PE=2 SV=1	76.55	Control_MRlabs	Control_MRlabs
Q66X03	NACHT, LRR and PYD domains-containing protein 9A OS=Mus musculus OX=10090 GN=Nlrp9a PE=1 SV=1	46.55	Control_MRlabs	Control_MRlabs
Q5SUQ9	CST complex subunit CTC1 OS=Mus musculus OX=10090 GN=Ctc1 PE=1 SV=2	25.11	Control_MRlabs	Control_MRlabs
Q99N87	28S ribosomal protein S5, mitochondrial OS=Mus musculus OX=10090 GN=Mrps5 PE=1 SV=1	72.45	Control_MRlabs	Control_MRlabs
Q9CWL2	Zinc finger protein castor homolog 1 OS=Mus musculus OX=10090 GN=Casz1 PE=1 SV=3	126.24	Control_MRlabs	Control_MRlabs
Q99N84	28S ribosomal protein S18b, mitochondrial OS=Mus musculus OX=10090 GN=Mrps18b PE=1 SV=1	52.61	Control_MRlabs	Control_MRlabs
Q99N80	Synaptotagmin-like protein 1 OS=Mus musculus OX=10090 GN=Sytl1 PE=1 SV=2	56.27	Control_MRlabs	Control_MRlabs
P0C7L0	WAS/WASL-interacting protein family member 3 OS=Mus musculus OX=10090 GN=Wipf3 PE=1 SV=1	3.11	Control_MRlabs	Control_MRlabs
P54276	DNA mismatch repair protein Msh6 OS=Mus musculus OX=10090 GN=Msh6 PE=1 SV=3	40.31	Control_MRlabs	Control_MRlabs
Q61362	Chitinase-3-like protein 1 OS=Mus musculus OX=10090 GN=Chi3l1 PE=1 SV=3	59.39	Control_MRlabs	Control_MRlabs
P70704	Phospholipid-transporting ATPase IA OS=Mus musculus OX=10090 GN=Atp8a1 PE=1 SV=2	19.55	Control_MRlabs	Control_MRlabs
P70701	Protein Wnt-10a OS=Mus musculus OX=10090 GN=Wnt10a PE=2 SV=1	114.38	Control_MRlabs	Control_MRlabs
P68404	Protein kinase C beta type OS=Mus musculus OX=10090 GN=Prkcb PE=1 SV=4	83.63	Control_MRlabs	Control_MRlabs
P70700	DNA-directed RNA polymerase I subunit RPA2 OS=Mus musculus OX=10090 GN=Polr1b PE=1 SV=2	56.08	Control_MRlabs	Control_MRlabs
A2A9R3	Melanoma-associated antigen B4 OS=Mus musculus OX=10090 GN=Mageb4 PE=1 SV=1	27.35	Control_MRlabs	Control_MRlabs
P17710	Hexokinase-1 OS=Mus musculus OX=10090 GN=Hk1 PE=1 SV=3	65.84	Control_MRlabs	Control_MRlabs
Q80ZI6	E3 ubiquitin-protein ligase LRSAM1 OS=Mus musculus OX=10090 GN=Lrsam1 PE=1 SV=1	70.42	Control_MRlabs	Control_MRlabs
Q80ZI2	Receptor-transporting protein 2 OS=Mus musculus OX=10090 GN=Rtp2 PE=1 SV=1	15.59	Control_MRlabs	Control_MRlabs
Q99MV1	Tudor domain-containing protein 1 OS=Mus musculus OX=10090 GN=Tdrd1 PE=1 SV=2	73.04	Control_MRlabs	Control_MRlabs
Q66JT1	Volume-regulated anion channel subunit LRRC8E OS=Mus musculus OX=10090 GN=Lrrc8e PE=2 SV=2	56.43	Control_MRlabs	Control_MRlabs
Q06186	Proheparin-binding EGF-like growth factor OS=Mus musculus OX=10090 GN=Hbegf PE=2 SV=1	346.52	Control_MRlabs	Control_MRlabs
P46662	Merlin OS=Mus musculus OX=10090 GN=Nf2 PE=1 SV=2	22.14	Control_MRlabs	Control_MRlabs
P46660	Alpha-internexin OS=Mus musculus OX=10090 GN=Ina PE=1 SV=3	125.87	Control_MRlabs	Control_MRlabs
Q99MU3	Double-stranded RNA-specific adenosine deaminase OS=Mus musculus OX=10090 GN=Adar PE=1 SV=2	23.5	Control_MRlabs	Control_MRlabs
Q923W9	Disintegrin and metalloproteinase domain-containing protein 33 OS=Mus musculus OX=10090 GN=Adam33 PE=1 SV=3	18.65	Control_MRlabs	Control_MRlabs
Q66JS6	Eukaryotic translation initiation factor 3 subunit J-B OS=Mus musculus OX=10090 GN=Eif3j2 PE=1 SV=1	84.3	Control_MRlabs	Control_MRlabs
P54254	Ataxin-1 OS=Mus musculus OX=10090 GN=Atxn1 PE=1 SV=2	18.5	Control_MRlabs	Control_MRlabs
Q76HP3	Transmembrane protein 132D OS=Mus musculus OX=10090 GN=Tmem132d PE=2 SV=1	31.87	Control_MRlabs	Control_MRlabs
Q99MT2	MutS protein homolog 4 OS=Mus musculus OX=10090 GN=Msh4 PE=2 SV=1	15.58	Control_MRlabs	Control_MRlabs
Q3TTE0	Disintegrin and metalloproteinase domain-containing protein 5 OS=Mus musculus OX=10090 GN=Adam5 PE=1 SV=1	90.07	Control_MRlabs	Control_MRlabs
Q9JJZ5	Epidermal growth factor-like protein 6 OS=Mus musculus OX=10090 GN=Egfl6 PE=1 SV=1	102.5	Control_MRlabs	Control_MRlabs
Q9JJZ4	Ubiquitin-conjugating enzyme E2 J1 OS=Mus musculus OX=10090 GN=Ube2j1 PE=1 SV=2	27.02	Control_MRlabs	Control_MRlabs
Q9D8H7	Metalloendopeptidase OMA1, mitochondrial OS=Mus musculus OX=10090 GN=Oma1 PE=1 SV=1	141.37	Control_MRlabs	Control_MRlabs
P15501	Prostatic spermine-binding protein OS=Mus musculus OX=10090 GN=Sbp PE=2 SV=1	391.36	Control_MRlabs	Control_MRlabs
P07901	Heat shock protein HSP 90-alpha OS=Mus musculus OX=10090 GN=Hsp90aa1 PE=1 SV=4	82.06	Control_MRlabs	Control_MRlabs
Q99N43	Kremen protein 1 OS=Mus musculus OX=10090 GN=Kremen1 PE=1 SV=2	25.65	Control_MRlabs	Control_MRlabs
P97326	Cadherin-6 OS=Mus musculus OX=10090 GN=Cdh6 PE=1 SV=2	141.34	Control_MRlabs	Control_MRlabs
P97321	Prolyl endopeptidase FAP OS=Mus musculus OX=10090 GN=Fap PE=1 SV=1	20.67	Control_MRlabs	Control_MRlabs
Q99MR9	Protein phosphatase 1 regulatory subunit 3A OS=Mus musculus OX=10090 GN=Ppp1r3a PE=1 SV=2	51.34	Control_MRlabs	Control_MRlabs
Q6TAC4	Vomeronasal type-2 receptor 26 OS=Mus musculus OX=10090 GN=Vmn2r26 PE=2 SV=2	105.3	Control_MRlabs	Control_MRlabs
Q99MR6	Serrate RNA effector molecule homolog OS=Mus musculus OX=10090 GN=Srrt PE=1 SV=1	134.74	Control_MRlabs	Control_MRlabs
Q99N32	Beta-klotho OS=Mus musculus OX=10090 GN=Klb PE=1 SV=1	57.46	Control_MRlabs	Control_MRlabs
Q5Y4Y6	Gasdermin-A3 OS=Mus musculus OX=10090 GN=Gsdma3 PE=1 SV=1	174.35	Control_MRlabs	Control_MRlabs
O35185	Class E basic helix-loop-helix protein 40 OS=Mus musculus OX=10090 GN=Bhlhe40 PE=1 SV=1	90.52	Control_MRlabs	Control_MRlabs
O35182	Mothers against decapentaplegic homolog 6 OS=Mus musculus OX=10090 GN=Smad6 PE=1 SV=1	56.19	Control_MRlabs	Control_MRlabs
Q3U5C7	Prickle-like protein 1 OS=Mus musculus OX=10090 GN=Prickle1 PE=1 SV=1	114.38	Control_MRlabs	Control_MRlabs
Q61312	Transcription factor AP-2 gamma OS=Mus musculus OX=10090 GN=Tfap2c PE=1 SV=2	20.7	Control_MRlabs	Control_MRlabs
Q9JJX8	Serine/threonine-protein kinase 32B OS=Mus musculus OX=10090 GN=Stk32b PE=2 SV=2	12.04	Control_MRlabs	Control_MRlabs
Q9JK97	Potassium voltage-gated channel subfamily KQT member 4 OS=Mus musculus OX=10090 GN=Kcnq4 PE=2 SV=2	5.53	Control_MRlabs	Control_MRlabs
Q9JJX6	P2X purinoceptor 4 OS=Mus musculus OX=10090 GN=P2rx4 PE=1 SV=1	29.52	Control_MRlabs	Control_MRlabs
Q9JK91	DNA mismatch repair protein Mlh1 OS=Mus musculus OX=10090 GN=Mlh1 PE=1 SV=2	43.64	Control_MRlabs	Control_MRlabs
P97314	Cysteine and glycine-rich protein 2 OS=Mus musculus OX=10090 GN=Csrp2 PE=1 SV=3	11.94	Control_MRlabs	Control_MRlabs
P97311	DNA replication licensing factor MCM6 OS=Mus musculus OX=10090 GN=Mcm6 PE=1 SV=1	75.12	Control_MRlabs	Control_MRlabs
Q80ZD3	Sodium-independent sulfate anion transporter OS=Mus musculus OX=10090 GN=Slc26a11 PE=2 SV=2	108.42	Control_MRlabs	Control_MRlabs
Q66K08	Cartilage intermediate layer protein 1 OS=Mus musculus OX=10090 GN=Cilp PE=1 SV=1	34.04	Control_MRlabs	Control_MRlabs
Q9JK88	Serpin I2 OS=Mus musculus OX=10090 GN=Serpini2 PE=1 SV=1	59.6	Control_MRlabs	Control_MRlabs
Q61301	Catenin alpha-2 OS=Mus musculus OX=10090 GN=Ctnna2 PE=1 SV=3	52.57	Control_MRlabs	Control_MRlabs
Q9JJW6	Aly/REF export factor 2 OS=Mus musculus OX=10090 GN=Alyref2 PE=1 SV=1	70.92	Control_MRlabs	Control_MRlabs
Q9JK81	UPF0160 protein MYG1, mitochondrial OS=Mus musculus OX=10090 GN=Myg1 PE=1 SV=1	34.59	Control_MRlabs	Control_MRlabs
P97302	Transcription regulator protein BACH1 OS=Mus musculus OX=10090 GN=Bach1 PE=1 SV=1	166.19	Control_MRlabs	Control_MRlabs
Q9D8E6	60S ribosomal protein L4 OS=Mus musculus OX=10090 GN=Rpl4 PE=1 SV=3	58.08	Control_MRlabs	Control_MRlabs
Q99N14	Tachykinin-4 OS=Mus musculus OX=10090 GN=Tac4 PE=1 SV=1	202.05	Control_MRlabs	Control_MRlabs
Q63ZW7	InaD-like protein OS=Mus musculus OX=10090 GN=Patj PE=1 SV=2	31.47	Control_MRlabs	Control_MRlabs
Q3TTA7	E3 ubiquitin-protein ligase CBL-B OS=Mus musculus OX=10090 GN=Cblb PE=1 SV=3	95.4	Control_MRlabs	Control_MRlabs
Q9JJV3	Voltage-dependent calcium channel gamma-like subunit OS=Mus musculus OX=10090 GN=Tmem37 PE=2 SV=1	148.91	Control_MRlabs	Control_MRlabs
Q3V036	Coiled-coil domain-containing protein 27 OS=Mus musculus OX=10090 GN=Ccdc27 PE=2 SV=1	60.44	Control_MRlabs	Control_MRlabs
Q8BQZ8	Potassium voltage-gated channel subfamily S member 3 OS=Mus musculus OX=10090 GN=Kcns3 PE=2 SV=1	12.97	Control_MRlabs	Control_MRlabs
Q63ZV0	Insulinoma-associated protein 1 OS=Mus musculus OX=10090 GN=Insm1 PE=1 SV=1	124.82	Control_MRlabs	Control_MRlabs
Q923Q2	StAR-related lipid transfer protein 13 OS=Mus musculus OX=10090 GN=Stard13 PE=1 SV=5	75.72	Control_MRlabs	Control_MRlabs
Q80ZA7	Fragile X mental retardation 1 neighbor protein OS=Mus musculus OX=10090 GN=Fmr1nb PE=2 SV=1	84.68	Control_MRlabs	Control_MRlabs
Q99MN9	Propionyl-CoA carboxylase beta chain, mitochondrial OS=Mus musculus OX=10090 GN=Pccb PE=1 SV=2	58.59	Control_MRlabs	Control_MRlabs
Q9D8C2	Tetraspanin-13 OS=Mus musculus OX=10090 GN=Tspan13 PE=1 SV=1	119.33	Control_MRlabs	Control_MRlabs
Q8BQY8	Checkpoint protein HUS1 OS=Mus musculus OX=10090 GN=Hus1 PE=2 SV=1	116.26	Control_MRlabs	Control_MRlabs
A0A088MLT8	IQCJ-SCHIP1 readthrough transcript protein OS=Mus musculus OX=10090 GN=Iqcj-Schip1 PE=1 SV=2	165.66	Control_MRlabs	Control_MRlabs
Q9JJT9	Phosphorylated adapter RNA export protein OS=Mus musculus OX=10090 GN=Phax PE=1 SV=1	71.32	Control_MRlabs	Control_MRlabs
Q3UAW9	Transcription factor IIIB 50 kDa subunit OS=Mus musculus OX=10090 GN=Brf2 PE=1 SV=1	110.63	Control_MRlabs	Control_MRlabs
Q9JK53	Prolargin OS=Mus musculus OX=10090 GN=Prelp PE=1 SV=2	73.32	Control_MRlabs	Control_MRlabs
P30275	Creatine kinase U-type, mitochondrial OS=Mus musculus OX=10090 GN=Ckmt1 PE=1 SV=1	59.48	Control_MRlabs	Control_MRlabs
Q9D8B3	Charged multivesicular body protein 4b OS=Mus musculus OX=10090 GN=Chmp4b PE=1 SV=2	48.89	Control_MRlabs	Control_MRlabs
Q3V016	Homeodomain-interacting protein kinase 4 OS=Mus musculus OX=10090 GN=Hipk4 PE=1 SV=2	41.92	Control_MRlabs	Control_MRlabs
O35136	Neural cell adhesion molecule 2 OS=Mus musculus OX=10090 GN=Ncam2 PE=1 SV=1	77.23	Control_MRlabs	Control_MRlabs
Q8BR90	UPF0600 protein C5orf51 homolog OS=Mus musculus OX=10090 PE=1 SV=1	429.28	Control_MRlabs	Control_MRlabs
Q9JJS6	Beta,beta-carotene 15,15'-dioxygenase OS=Mus musculus OX=10090 GN=Bco1 PE=1 SV=2	118.4	Control_MRlabs	Control_MRlabs
Q2MV57	Tectonic-2 OS=Mus musculus OX=10090 GN=Tctn2 PE=1 SV=2	29.37	Control_MRlabs	Control_MRlabs
Q99ML9	E3 ubiquitin-protein ligase Arkadia OS=Mus musculus OX=10090 GN=Rnf111 PE=1 SV=1	23.56	Control_MRlabs	Control_MRlabs
Q5SUF2	Luc7-like protein 3 OS=Mus musculus OX=10090 GN=Luc7l3 PE=1 SV=1	27.31	Control_MRlabs	Control_MRlabs
Q2WF71	Leucine-rich repeat and fibronectin type III domain-containing protein 1 OS=Mus musculus OX=10090 GN=Lrfn1 PE=1 SV=1	25.99	Control_MRlabs	Control_MRlabs
Q99ML2	Non-receptor tyrosine-protein kinase TNK1 OS=Mus musculus OX=10090 GN=Tnk1 PE=1 SV=2	6.21	Control_MRlabs	Control_MRlabs
P0C7A3	Ghrelin O-acyltransferase OS=Mus musculus OX=10090 GN=Mboat4 PE=1 SV=1	11.25	Control_MRlabs	Control_MRlabs
Q75N62	GTPase IMAP family member 8 OS=Mus musculus OX=10090 GN=Gimap8 PE=1 SV=1	54.77	Control_MRlabs	Control_MRlabs
Q9JK38	Glucosamine 6-phosphate N-acetyltransferase OS=Mus musculus OX=10090 GN=Gnpnat1 PE=1 SV=1	20.94	Control_MRlabs	Control_MRlabs
Q60889	Olfactory receptor 5 OS=Mus musculus OX=10090 GN=Olfr5 PE=2 SV=2	95.75	Control_MRlabs	Control_MRlabs
Q149F1	RNA pseudouridylate synthase domain-containing protein 2 OS=Mus musculus OX=10090 GN=Rpusd2 PE=1 SV=2	39.31	Control_MRlabs	Control_MRlabs
Q99MK8	Beta-adrenergic receptor kinase 1 OS=Mus musculus OX=10090 GN=Grk2 PE=1 SV=2	71.06	Control_MRlabs	Control_MRlabs
J3QMY9	Type 2 DNA topoisomerase 6 subunit B-like OS=Mus musculus OX=10090 GN=Top6bl PE=1 SV=2	85.55	Control_MRlabs	Control_MRlabs
Q8BR76	Meckelin OS=Mus musculus OX=10090 GN=Tmem67 PE=1 SV=2	72.03	Control_MRlabs	Control_MRlabs
Q60875	Rho guanine nucleotide exchange factor 2 OS=Mus musculus OX=10090 GN=Arhgef2 PE=1 SV=4	73.29	Control_MRlabs	Control_MRlabs
Q0VBN2	Dermatan-sulfate epimerase-like protein OS=Mus musculus OX=10090 GN=Dsel PE=2 SV=1	22.02	Control_MRlabs	Control_MRlabs
Q9QX66	Zinc finger protein neuro-d4 OS=Mus musculus OX=10090 GN=Dpf1 PE=1 SV=2	93.66	Control_MRlabs	Control_MRlabs
A3KMP2	Tetratricopeptide repeat protein 38 OS=Mus musculus OX=10090 GN=Ttc38 PE=1 SV=2	68.94	Control_MRlabs	Control_MRlabs
P61375	LIM/homeobox protein Lhx5 OS=Mus musculus OX=10090 GN=Lhx5 PE=2 SV=1	96.72	Control_MRlabs	Control_MRlabs
Q60865	Caprin-1 OS=Mus musculus OX=10090 GN=Caprin1 PE=1 SV=2	148.02	Control_MRlabs	Control_MRlabs
Q60864	Stress-induced-phosphoprotein 1 OS=Mus musculus OX=10090 GN=Stip1 PE=1 SV=1	109.27	Control_MRlabs	Control_MRlabs
P61372	Insulin gene enhancer protein ISL-1 OS=Mus musculus OX=10090 GN=Isl1 PE=1 SV=1	19.37	Control_MRlabs	Control_MRlabs
Q05BQ1	Protein turtle homolog A OS=Mus musculus OX=10090 GN=Igsf9 PE=1 SV=2	85.42	Control_MRlabs	Control_MRlabs
Q60857	Sodium-dependent serotonin transporter OS=Mus musculus OX=10090 GN=Slc6a4 PE=1 SV=4	227.16	Control_MRlabs	Control_MRlabs
Q60855	Receptor-interacting serine/threonine-protein kinase 1 OS=Mus musculus OX=10090 GN=Ripk1 PE=1 SV=1	55.08	Control_MRlabs	Control_MRlabs
Q149C3	Leucine-rich repeat and immunoglobulin-like domain containing-NOGO receptor-interacting protein 4 OS=Mus musculus OX=10090 GN=Lingo4 PE=2 SV=2	15.71	Control_MRlabs	Control_MRlabs
Q149C2	TRAF3-interacting protein 1 OS=Mus musculus OX=10090 GN=Traf3ip1 PE=1 SV=2	67.74	Control_MRlabs	Control_MRlabs
Q5XG73	Acyl-CoA-binding domain-containing protein 5 OS=Mus musculus OX=10090 GN=Acbd5 PE=1 SV=1	64.14	Control_MRlabs	Control_MRlabs
Q0EEE2	Patched domain-containing protein 3 OS=Mus musculus OX=10090 GN=Ptchd3 PE=1 SV=1	35.03	Control_MRlabs	Control_MRlabs
Q8C341	SUN domain-containing ossification factor OS=Mus musculus OX=10090 GN=Suco PE=1 SV=3	1.81	Control_MRlabs	Control_MRlabs
Q9JJN5	Carboxypeptidase N catalytic chain OS=Mus musculus OX=10090 GN=Cpn1 PE=1 SV=1	65.92	Control_MRlabs	Control_MRlabs
Q9JJN4	Succinyl-CoA:3-ketoacid coenzyme A transferase 2A, mitochondrial OS=Mus musculus OX=10090 GN=Oxct2a PE=2 SV=2	45.03	Control_MRlabs	Control_MRlabs
Q60846	Tumor necrosis factor receptor superfamily member 8 OS=Mus musculus OX=10090 GN=Tnfrsf8 PE=2 SV=1	62.09	Control_MRlabs	Control_MRlabs
Q149B8	PGC-1 and ERR-induced regulator in muscle protein 1 OS=Mus musculus OX=10090 GN=Perm1 PE=1 SV=2	64.95	Control_MRlabs	Control_MRlabs
P59055	Cysteine/serine-rich nuclear protein 3 OS=Mus musculus OX=10090 GN=Csrnp3 PE=1 SV=2	43.35	Control_MRlabs	Control_MRlabs
P59054	Cysteine/serine-rich nuclear protein 1 OS=Mus musculus OX=10090 GN=Csrnp1 PE=2 SV=1	19.79	Control_MRlabs	Control_MRlabs
Q80YY7	Zinc finger protein 618 OS=Mus musculus OX=10090 GN=Znf618 PE=2 SV=3	26.15	Control_MRlabs	Control_MRlabs
Q8C2R7	GPI mannosyltransferase 1 OS=Mus musculus OX=10090 GN=Pigm PE=2 SV=2	39.6	Control_MRlabs	Control_MRlabs
Q60838	Segment polarity protein dishevelled homolog DVL-2 OS=Mus musculus OX=10090 GN=Dvl2 PE=1 SV=2	41.56	Control_MRlabs	Control_MRlabs
P51569	Alpha-galactosidase A OS=Mus musculus OX=10090 GN=Gla PE=1 SV=1	92.82	Control_MRlabs	Control_MRlabs
Q6X893	Choline transporter-like protein 1 OS=Mus musculus OX=10090 GN=Slc44a1 PE=1 SV=3	37.35	Control_MRlabs	Control_MRlabs
Q8BQQ1	Probable palmitoyltransferase ZDHHC14 OS=Mus musculus OX=10090 GN=Zdhhc14 PE=1 SV=1	96.24	Control_MRlabs	Control_MRlabs
Q2EMV9	Poly [ADP-ribose] polymerase 14 OS=Mus musculus OX=10090 GN=Parp14 PE=1 SV=3	47.39	Control_MRlabs	Control_MRlabs
Q60823	RAC-beta serine/threonine-protein kinase OS=Mus musculus OX=10090 GN=Akt2 PE=1 SV=1	3.8	Control_MRlabs	Control_MRlabs
Q07832	Serine/threonine-protein kinase PLK1 OS=Mus musculus OX=10090 GN=Plk1 PE=1 SV=2	16.62	Control_MRlabs	Control_MRlabs
Q32M02	Fascin-2 OS=Mus musculus OX=10090 GN=Fscn2 PE=2 SV=1	15.11	Control_MRlabs	Control_MRlabs
Q8BQP8	Rab11 family-interacting protein 4 OS=Mus musculus OX=10090 GN=Rab11fip4 PE=1 SV=1	103.06	Control_MRlabs	Control_MRlabs
A1L314	Macrophage-expressed gene 1 protein OS=Mus musculus OX=10090 GN=Mpeg1 PE=1 SV=1	47.16	Control_MRlabs	Control_MRlabs
Q60819	Interleukin-15 receptor subunit alpha OS=Mus musculus OX=10090 GN=Il15ra PE=1 SV=1	141.22	Control_MRlabs	Control_MRlabs
Q9JJK2	LanC-like protein 2 OS=Mus musculus OX=10090 GN=Lancl2 PE=1 SV=1	62	Control_MRlabs	Control_MRlabs
Q60813	Disintegrin and metalloproteinase domain-containing protein 1a OS=Mus musculus OX=10090 GN=Adam1a PE=2 SV=3	24.02	Control_MRlabs	Control_MRlabs
Q99MD9	Nuclear autoantigenic sperm protein OS=Mus musculus OX=10090 GN=Nasp PE=1 SV=2	139.96	Control_MRlabs	Control_MRlabs
Q99MD6	Thioredoxin reductase 3 OS=Mus musculus OX=10090 GN=Txnrd3 PE=1 SV=3	106.13	Control_MRlabs	Control_MRlabs
P12804	Fibroleukin OS=Mus musculus OX=10090 GN=Fgl2 PE=1 SV=1	41.99	Control_MRlabs	Control_MRlabs
Q60805	Tyrosine-protein kinase Mer OS=Mus musculus OX=10090 GN=Mertk PE=1 SV=1	109.71	Control_MRlabs	Control_MRlabs
Q60803	TNF receptor-associated factor 3 OS=Mus musculus OX=10090 GN=Traf3 PE=1 SV=2	234.56	Control_MRlabs	Control_MRlabs
Q9D7W4	Tetraspanin-17 OS=Mus musculus OX=10090 GN=Tspan17 PE=1 SV=1	60.94	Control_MRlabs	Control_MRlabs
Q8BQN6	Zinc finger protein OZF OS=Mus musculus OX=10090 GN=Znf146 PE=2 SV=2	28.55	Control_MRlabs	Control_MRlabs
A2ARP9	Cation channel sperm-associated protein 2 OS=Mus musculus OX=10090 GN=Catsper2 PE=1 SV=2	45.14	Control_MRlabs	Control_MRlabs
Q01279	Epidermal growth factor receptor OS=Mus musculus OX=10090 GN=Egfr PE=1 SV=1	53.38	Control_MRlabs	Control_MRlabs
Q9JJI6	GPI ethanolamine phosphate transferase 3 OS=Mus musculus OX=10090 GN=Pigo PE=1 SV=2	200.18	Control_MRlabs	Control_MRlabs
Q6PIP5	NudC domain-containing protein 1 OS=Mus musculus OX=10090 GN=Nudcd1 PE=1 SV=2	94.07	Control_MRlabs	Control_MRlabs
Q07802	Transcription factor COE1 OS=Mus musculus OX=10090 GN=Ebf1 PE=1 SV=1	18.59	Control_MRlabs	Control_MRlabs
Q9CW73	Galactosylgalactosylxylosylprotein 3-beta-glucuronosyltransferase 1 OS=Mus musculus OX=10090 GN=B3gat1 PE=2 SV=3	230.06	Control_MRlabs	Control_MRlabs
Q9D7V1	SH2 domain-containing protein 4A OS=Mus musculus OX=10090 GN=Sh2d4a PE=1 SV=1	192.02	Control_MRlabs	Control_MRlabs
Q8BQM9	Mediator of RNA polymerase II transcription subunit 12-like protein OS=Mus musculus OX=10090 GN=Med12l PE=1 SV=2	52.23	Control_MRlabs	Control_MRlabs
Q99MB2	Mitochondrial fission regulator 1 OS=Mus musculus OX=10090 GN=Mtfr1 PE=1 SV=1	17.1	Control_MRlabs	Control_MRlabs
Q99MB1	Toll-like receptor 3 OS=Mus musculus OX=10090 GN=Tlr3 PE=1 SV=2	80.14	Control_MRlabs	Control_MRlabs
Q923D5	WW domain-binding protein 11 OS=Mus musculus OX=10090 GN=Wbp11 PE=1 SV=2	107.28	Control_MRlabs	Control_MRlabs
P39447	Tight junction protein ZO-1 OS=Mus musculus OX=10090 GN=Tjp1 PE=1 SV=2	49.51	Control_MRlabs	Control_MRlabs
Q80YS9	Serine/threonine kinase-like domain-containing protein STKLD1 OS=Mus musculus OX=10090 GN=Stkld1 PE=2 SV=3	128.73	Control_MRlabs	Control_MRlabs
Q80YS6	Actin filament-associated protein 1 OS=Mus musculus OX=10090 GN=Afap1 PE=1 SV=1	52.84	Control_MRlabs	Control_MRlabs
Q80YS5	Leucine-rich repeat-containing protein 27 OS=Mus musculus OX=10090 GN=Lrrc27 PE=2 SV=1	56.76	Control_MRlabs	Control_MRlabs
Q4V9Z5	Seizure 6-like protein 2 OS=Mus musculus OX=10090 GN=Sez6l2 PE=1 SV=1	16.16	Control_MRlabs	Control_MRlabs
P70699	Lysosomal alpha-glucosidase OS=Mus musculus OX=10090 GN=Gaa PE=1 SV=2	34.5	Control_MRlabs	Control_MRlabs
Q9JJG9	Nitric oxide-associated protein 1 OS=Mus musculus OX=10090 GN=Noa1 PE=1 SV=1	33.14	Control_MRlabs	Control_MRlabs
P70691	UDP-glucuronosyltransferase 1-2 OS=Mus musculus OX=10090 GN=Ugt1a2 PE=1 SV=1	125.69	Control_MRlabs	Control_MRlabs
Q0VBD2	Protein MCM10 homolog OS=Mus musculus OX=10090 GN=Mcm10 PE=1 SV=1	15.78	Control_MRlabs	Control_MRlabs
Q80YR9	RNA-binding protein 12B-A OS=Mus musculus OX=10090 GN=Rbm12b1 PE=1 SV=2	42.77	Control_MRlabs	Control_MRlabs
Q80YR5	Scaffold attachment factor B2 OS=Mus musculus OX=10090 GN=Safb2 PE=1 SV=2	35.58	Control_MRlabs	Control_MRlabs
Q80YR4	E3 ubiquitin-protein ligase ZNF598 OS=Mus musculus OX=10090 GN=Znf598 PE=1 SV=1	77.51	Control_MRlabs	Control_MRlabs
Q923B3	Neurotrophin receptor-interacting factor 1 OS=Mus musculus OX=10090 GN=Nrif1 PE=1 SV=3	135.48	Control_MRlabs	Control_MRlabs
Q9JJF3	Ribosomal oxygenase 1 OS=Mus musculus OX=10090 GN=Riox1 PE=1 SV=2	76.33	Control_MRlabs	Control_MRlabs
A2A8Z1	Oxysterol-binding protein-related protein 9 OS=Mus musculus OX=10090 GN=Osbpl9 PE=1 SV=1	51.74	Control_MRlabs	Control_MRlabs
P37242	Thyroid hormone receptor beta OS=Mus musculus OX=10090 GN=Thrb PE=1 SV=1	21.53	Control_MRlabs	Control_MRlabs
Q80Z25	Oral-facial-digital syndrome 1 protein homolog OS=Mus musculus OX=10090 GN=Ofd1 PE=1 SV=1	78.08	Control_MRlabs	Control_MRlabs
Q9D842	Aprataxin and PNK-like factor OS=Mus musculus OX=10090 GN=Aplf PE=1 SV=2	21.29	Control_MRlabs	Control_MRlabs
Q80YQ2	Mediator of RNA polymerase II transcription subunit 23 OS=Mus musculus OX=10090 GN=Med23 PE=1 SV=2	46.84	Control_MRlabs	Control_MRlabs
Q11011	Puromycin-sensitive aminopeptidase OS=Mus musculus OX=10090 GN=Npepps PE=1 SV=2	20.06	Control_MRlabs	Control_MRlabs
D3YYI7	Probable E3 ubiquitin-protein ligase RNF217 OS=Mus musculus OX=10090 GN=Rnf217 PE=3 SV=2	11.26	Control_MRlabs	Control_MRlabs
Q01237	3-hydroxy-3-methylglutaryl-coenzyme A reductase OS=Mus musculus OX=10090 GN=Hmgcr PE=1 SV=3	18.34	Control_MRlabs	Control_MRlabs
P37238	Peroxisome proliferator-activated receptor gamma OS=Mus musculus OX=10090 GN=Pparg PE=1 SV=3	48.73	Control_MRlabs	Control_MRlabs
P31938	Dual specificity mitogen-activated protein kinase kinase 1 OS=Mus musculus OX=10090 GN=Map2k1 PE=1 SV=2	37.12	Control_MRlabs	Control_MRlabs
Q9QWI6	SRC kinase signaling inhibitor 1 OS=Mus musculus OX=10090 GN=Srcin1 PE=1 SV=2	43.68	Control_MRlabs	Control_MRlabs
Q9D832	DnaJ homolog subfamily B member 4 OS=Mus musculus OX=10090 GN=Dnajb4 PE=1 SV=1	34.1	Control_MRlabs	Control_MRlabs
Q03402	Cysteine-rich secretory protein 3 OS=Mus musculus OX=10090 GN=Crisp3 PE=1 SV=1	247.22	Control_MRlabs	Control_MRlabs
A2ARK0	Protein FAM83C OS=Mus musculus OX=10090 GN=Fam83c PE=2 SV=1	48.8	Control_MRlabs	Control_MRlabs
P70665	Sialate O-acetylesterase OS=Mus musculus OX=10090 GN=Siae PE=1 SV=3	52.98	Control_MRlabs	Control_MRlabs
Q1PSW8	E3 ubiquitin-protein ligase TRIM71 OS=Mus musculus OX=10090 GN=Trim71 PE=1 SV=1	14.06	Control_MRlabs	Control_MRlabs
P70663	SPARC-like protein 1 OS=Mus musculus OX=10090 GN=Sparcl1 PE=1 SV=3	48.21	Control_MRlabs	Control_MRlabs
Q9JJD0	THAP domain-containing protein 11 OS=Mus musculus OX=10090 GN=Thap11 PE=1 SV=1	66.74	Control_MRlabs	Control_MRlabs
Q9D826	Peroxisomal sarcosine oxidase OS=Mus musculus OX=10090 GN=Pipox PE=1 SV=1	60.94	Control_MRlabs	Control_MRlabs
Q148W0	Phospholipid-transporting ATPase IC OS=Mus musculus OX=10090 GN=Atp8b1 PE=1 SV=2	29.53	Control_MRlabs	Control_MRlabs
P37217	Early activation antigen CD69 OS=Mus musculus OX=10090 GN=Cd69 PE=2 SV=1	25.68	Control_MRlabs	Control_MRlabs
Q148V7	LisH domain and HEAT repeat-containing protein KIAA1468 OS=Mus musculus OX=10090 GN=Kiaa1468 PE=1 SV=1	178.19	Control_MRlabs	Control_MRlabs
Q9D819	Inorganic pyrophosphatase OS=Mus musculus OX=10090 GN=Ppa1 PE=1 SV=1	59.14	Control_MRlabs	Control_MRlabs
E9Q7X6	Protein HEG homolog 1 OS=Mus musculus OX=10090 GN=Heg1 PE=1 SV=1	15.44	Control_MRlabs	Control_MRlabs
P48794	Hyaluronidase PH-20 OS=Mus musculus OX=10090 GN=Spam1 PE=1 SV=2	103.92	Control_MRlabs	Control_MRlabs
D4PHA7	WSC domain-containing protein 2 OS=Mus musculus OX=10090 GN=Wscd2 PE=2 SV=1	138.29	Control_MRlabs	Control_MRlabs
Q6JPI3	Mediator of RNA polymerase II transcription subunit 13-like OS=Mus musculus OX=10090 GN=Med13l PE=1 SV=2	83.85	Control_MRlabs	Control_MRlabs
Q9D805	Calpain-9 OS=Mus musculus OX=10090 GN=Capn9 PE=2 SV=2	2.19	Control_MRlabs	Control_MRlabs
Q6P073	Ubiquitin-conjugating enzyme E2 J2 OS=Mus musculus OX=10090 GN=Ube2j2 PE=1 SV=1	53.47	Control_MRlabs	Control_MRlabs
Q3UZV7	UPF0577 protein KIAA1324-like homolog OS=Mus musculus OX=10090 PE=1 SV=1	69.35	Control_MRlabs	Control_MRlabs
Q9JJA9	General receptor for phosphoinositides 1-associated scaffold protein OS=Mus musculus OX=10090 GN=Grasp PE=1 SV=2	83.39	Control_MRlabs	Control_MRlabs
Q9D7N6	39S ribosomal protein L30, mitochondrial OS=Mus musculus OX=10090 GN=Mrpl30 PE=1 SV=1	10.44	Control_MRlabs	Control_MRlabs
Q9D7N3	28S ribosomal protein S9, mitochondrial OS=Mus musculus OX=10090 GN=Mrps9 PE=1 SV=3	10.47	Control_MRlabs	Control_MRlabs
P56375	Acylphosphatase-2 OS=Mus musculus OX=10090 GN=Acyp2 PE=1 SV=2	46.55	Control_MRlabs	Control_MRlabs
Q61282	Aggrecan core protein OS=Mus musculus OX=10090 GN=Acan PE=1 SV=2	42.69	Control_MRlabs	Control_MRlabs
Q6J756	Calpain-11 OS=Mus musculus OX=10090 GN=Capn11 PE=1 SV=1	74.36	Control_MRlabs	Control_MRlabs
Q922Z0	D-aspartate oxidase OS=Mus musculus OX=10090 GN=Ddo PE=1 SV=1	9.74	Control_MRlabs	Control_MRlabs
Q61271	Activin receptor type-1B OS=Mus musculus OX=10090 GN=Acvr1b PE=1 SV=1	115.05	Control_MRlabs	Control_MRlabs
Q78IQ7	Zinc transporter ZIP4 OS=Mus musculus OX=10090 GN=Slc39a4 PE=1 SV=1	127.66	Control_MRlabs	Control_MRlabs
Q6A4J8	Ubiquitin carboxyl-terminal hydrolase 7 OS=Mus musculus OX=10090 GN=Usp7 PE=1 SV=1	93.38	Control_MRlabs	Control_MRlabs
Q8BQC8	RB-associated KRAB zinc finger protein OS=Mus musculus OX=10090 GN=Rbak PE=1 SV=1	28.82	Control_MRlabs	Control_MRlabs
P11087	Collagen alpha-1(I) chain OS=Mus musculus OX=10090 GN=Col1a1 PE=1 SV=4	58.64	Control_MRlabs	Control_MRlabs
Q99M80	Receptor-type tyrosine-protein phosphatase T OS=Mus musculus OX=10090 GN=Ptprt PE=1 SV=2	20.15	Control_MRlabs	Control_MRlabs
Q61263	Sterol O-acyltransferase 1 OS=Mus musculus OX=10090 GN=Soat1 PE=1 SV=2	60.21	Control_MRlabs	Control_MRlabs
Q9D7K2	CST complex subunit TEN1 OS=Mus musculus OX=10090 GN=Ten1 PE=1 SV=1	32.43	Control_MRlabs	Control_MRlabs
Q922X9	Protein arginine N-methyltransferase 7 OS=Mus musculus OX=10090 GN=Prmt7 PE=1 SV=1	63.05	Control_MRlabs	Control_MRlabs
Q8C2B3	Histone deacetylase 7 OS=Mus musculus OX=10090 GN=Hdac7 PE=1 SV=2	85.75	Control_MRlabs	Control_MRlabs
P25206	DNA replication licensing factor MCM3 OS=Mus musculus OX=10090 GN=Mcm3 PE=1 SV=2	94.23	Control_MRlabs	Control_MRlabs
Q00780	Collagen alpha-1(VIII) chain OS=Mus musculus OX=10090 GN=Col8a1 PE=1 SV=3	94.48	Control_MRlabs	Control_MRlabs
Q562D6	tRNA (adenine(37)-N6)-methyltransferase OS=Mus musculus OX=10090 GN=Trmo PE=2 SV=2	57.81	Control_MRlabs	Control_MRlabs
Q0VAX3	Fatty acid desaturase 2-like protein FADS2P1 OS=Mus musculus OX=10090 GN=Fads2p1 PE=2 SV=1	58.38	Control_MRlabs	Control_MRlabs
Q9D7I8	Protein FAM83D OS=Mus musculus OX=10090 GN=Fam83d PE=2 SV=1	193.19	Control_MRlabs	Control_MRlabs
Q6IUP1	Spermatogenesis- and oogenesis-specific basic helix-loop-helix-containing protein 1 OS=Mus musculus OX=10090 GN=Sohlh1 PE=1 SV=1	102.37	Control_MRlabs	Control_MRlabs
Q99M51	Cytoplasmic protein NCK1 OS=Mus musculus OX=10090 GN=Nck1 PE=1 SV=1	97.22	Control_MRlabs	Control_MRlabs
Q61234	Alpha-1-syntrophin OS=Mus musculus OX=10090 GN=Snta1 PE=1 SV=1	0.28	Control_MRlabs	Control_MRlabs
Q61233	Plastin-2 OS=Mus musculus OX=10090 GN=Lcp1 PE=1 SV=4	58.68	Control_MRlabs	Control_MRlabs
Q8HW98	IgLON family member 5 OS=Mus musculus OX=10090 GN=Iglon5 PE=2 SV=2	5.46	Control_MRlabs	Control_MRlabs
Q3UZP0	MARVEL domain-containing protein 2 OS=Mus musculus OX=10090 GN=Marveld2 PE=1 SV=1	6.71	Control_MRlabs	Control_MRlabs
Q80YF9	Rho GTPase-activating protein 33 OS=Mus musculus OX=10090 GN=Arhgap33 PE=1 SV=1	18.5	Control_MRlabs	Control_MRlabs
Q80YF6	Uroplakin-3b OS=Mus musculus OX=10090 GN=Upk3b PE=1 SV=1	124.34	Control_MRlabs	Control_MRlabs
O35099	Mitogen-activated protein kinase kinase kinase 5 OS=Mus musculus OX=10090 GN=Map3k5 PE=1 SV=3	71.55	Control_MRlabs	Control_MRlabs
O35098	Dihydropyrimidinase-related protein 4 OS=Mus musculus OX=10090 GN=Dpysl4 PE=1 SV=1	37.17	Control_MRlabs	Control_MRlabs
Q99LS0	Augurin OS=Mus musculus OX=10090 GN=Ecrg4 PE=1 SV=2	294.65	Control_MRlabs	Control_MRlabs
Q922U2	Keratin, type II cytoskeletal 5 OS=Mus musculus OX=10090 GN=Krt5 PE=1 SV=1	82.63	Control_MRlabs	Control_MRlabs
Q61220	Protein kinase C-binding protein NELL2 OS=Mus musculus OX=10090 GN=Nell2 PE=1 SV=3	99.86	Control_MRlabs	Control_MRlabs
Q0VAV2	Exophilin-5 OS=Mus musculus OX=10090 GN=Exph5 PE=1 SV=1	110.35	Control_MRlabs	Control_MRlabs
Q3UMU9	Hepatoma-derived growth factor-related protein 2 OS=Mus musculus OX=10090 GN=Hdgfl2 PE=1 SV=1	26.43	Control_MRlabs	Control_MRlabs
Q6EDY6	F-actin-uncapping protein LRRC16A OS=Mus musculus OX=10090 GN=Carmil1 PE=1 SV=2	95.04	Control_MRlabs	Control_MRlabs
Q61216	Double-strand break repair protein MRE11 OS=Mus musculus OX=10090 GN=Mre11 PE=1 SV=1	19.61	Control_MRlabs	Control_MRlabs
Q61214	Dual specificity tyrosine-phosphorylation-regulated kinase 1A OS=Mus musculus OX=10090 GN=Dyrk1a PE=1 SV=1	90.23	Control_MRlabs	Control_MRlabs
Q9JIX9	Fas-activated serine/threonine kinase OS=Mus musculus OX=10090 GN=Fastk PE=1 SV=1	30.26	Control_MRlabs	Control_MRlabs
Q61210	Rho guanine nucleotide exchange factor 1 OS=Mus musculus OX=10090 GN=Arhgef1 PE=1 SV=2	19.73	Control_MRlabs	Control_MRlabs
Q9Z2Z9	Glutamine--fructose-6-phosphate aminotransferase [isomerizing] 2 OS=Mus musculus OX=10090 GN=Gfpt2 PE=1 SV=3	33.89	Control_MRlabs	Control_MRlabs
Q9Z2Z6	Mitochondrial carnitine/acylcarnitine carrier protein OS=Mus musculus OX=10090 GN=Slc25a20 PE=1 SV=1	25.33	Control_MRlabs	Control_MRlabs
Q3UN54	Secreted seminal-vesicle Ly-6 protein 1 OS=Mus musculus OX=10090 GN=Sslp1 PE=1 SV=1	396.76	Control_MRlabs	Control_MRlabs
Q922S8	Kinesin-like protein KIF2C OS=Mus musculus OX=10090 GN=Kif2c PE=1 SV=1	83.61	Control_MRlabs	Control_MRlabs
Q3UMT1	Protein phosphatase 1 regulatory subunit 12C OS=Mus musculus OX=10090 GN=Ppp1r12c PE=1 SV=1	14.68	Control_MRlabs	Control_MRlabs
F8VQB6	Unconventional myosin-X OS=Mus musculus OX=10090 GN=Myo10 PE=1 SV=1	8.7	Control_MRlabs	Control_MRlabs
Q922S4	cGMP-dependent 3',5'-cyclic phosphodiesterase OS=Mus musculus OX=10090 GN=Pde2a PE=1 SV=4	75.42	Control_MRlabs	Control_MRlabs
Q9JJ89	Coiled-coil domain-containing protein 86 OS=Mus musculus OX=10090 GN=Ccdc86 PE=1 SV=2	4.66	Control_MRlabs	Control_MRlabs
P24788	Cyclin-dependent kinase 11B OS=Mus musculus OX=10090 GN=Cdk11b PE=1 SV=2	23.11	Control_MRlabs	Control_MRlabs
A2A8L5	Receptor-type tyrosine-protein phosphatase F OS=Mus musculus OX=10090 GN=Ptprf PE=1 SV=1	4.92	Control_MRlabs	Control_MRlabs
A2A8L1	Chromodomain-helicase-DNA-binding protein 5 OS=Mus musculus OX=10090 GN=Chd5 PE=1 SV=1	90.41	Control_MRlabs	Control_MRlabs
F2YMG0	Serine protease 56 OS=Mus musculus OX=10090 GN=Prss56 PE=2 SV=1	48.3	Control_MRlabs	Control_MRlabs
Q58A65	C-Jun-amino-terminal kinase-interacting protein 4 OS=Mus musculus OX=10090 GN=Spag9 PE=1 SV=2	90.34	Control_MRlabs	Control_MRlabs
O35066	Kinesin-like protein KIF3C OS=Mus musculus OX=10090 GN=Kif3c PE=1 SV=3	74.88	Control_MRlabs	Control_MRlabs
Q9Z2X8	Kelch-like ECH-associated protein 1 OS=Mus musculus OX=10090 GN=Keap1 PE=1 SV=1	83.53	Control_MRlabs	Control_MRlabs
Q99M01	Phenylalanine--tRNA ligase, mitochondrial OS=Mus musculus OX=10090 GN=Fars2 PE=1 SV=1	26.86	Control_MRlabs	Control_MRlabs
Q3UMR0	Ankyrin repeat domain-containing protein 27 OS=Mus musculus OX=10090 GN=Ankrd27 PE=1 SV=2	38.55	Control_MRlabs	Control_MRlabs
Q9Z2W8	Glutamate receptor 4 OS=Mus musculus OX=10090 GN=Gria4 PE=1 SV=2	22.57	Control_MRlabs	Control_MRlabs
Q80YA8	Protein crumbs homolog 2 OS=Mus musculus OX=10090 GN=Crb2 PE=1 SV=3	56.16	Control_MRlabs	Control_MRlabs
Q922P8	Transmembrane protein 132A OS=Mus musculus OX=10090 GN=Tmem132a PE=1 SV=2	19.18	Control_MRlabs	Control_MRlabs
Q9Z2V5	Histone deacetylase 6 OS=Mus musculus OX=10090 GN=Hdac6 PE=1 SV=3	30.34	Control_MRlabs	Control_MRlabs
Q9CVB6	Actin-related protein 2/3 complex subunit 2 OS=Mus musculus OX=10090 GN=Arpc2 PE=1 SV=3	51.03	Control_MRlabs	Control_MRlabs
Q3UN16	Probable G-protein coupled receptor 162 OS=Mus musculus OX=10090 GN=Gpr162 PE=1 SV=2	45.41	Control_MRlabs	Control_MRlabs
P12791	Cytochrome P450 2B10 OS=Mus musculus OX=10090 GN=Cyp2b10 PE=1 SV=1	2.04	Control_MRlabs	Control_MRlabs
Q9JIS8	Solute carrier family 12 member 4 OS=Mus musculus OX=10090 GN=Slc12a4 PE=1 SV=2	84.56	Control_MRlabs	Control_MRlabs
Q9JIS7	Voltage-dependent L-type calcium channel subunit alpha-1F OS=Mus musculus OX=10090 GN=Cacna1f PE=1 SV=1	45.67	Control_MRlabs	Control_MRlabs
Q60795	Nuclear factor erythroid 2-related factor 2 OS=Mus musculus OX=10090 GN=Nfe2l2 PE=1 SV=2	25.55	Control_MRlabs	Control_MRlabs
Q6PHZ5	Putative RNA-binding protein 15B OS=Mus musculus OX=10090 GN=Rbm15b PE=1 SV=2	79.88	Control_MRlabs	Control_MRlabs
Q60790	Ras GTPase-activating protein 3 OS=Mus musculus OX=10090 GN=Rasa3 PE=1 SV=2	79.4	Control_MRlabs	Control_MRlabs
Q99LL5	Periodic tryptophan protein 1 homolog OS=Mus musculus OX=10090 GN=Pwp1 PE=1 SV=1	31.34	Control_MRlabs	Control_MRlabs
Q6VNS1	NT-3 growth factor receptor OS=Mus musculus OX=10090 GN=Ntrk3 PE=1 SV=1	105.7	Control_MRlabs	Control_MRlabs
P0C6A2	Mastermind-like domain-containing protein 1 OS=Mus musculus OX=10090 GN=Mamld1 PE=3 SV=1	45.09	Control_MRlabs	Control_MRlabs
Q8BPW0	IQ domain-containing protein J OS=Mus musculus OX=10090 GN=Iqcj PE=4 SV=1	10.11	Control_MRlabs	Control_MRlabs
Q2YFS1	Paired immunoglobulin-like type 2 receptor beta-2 OS=Mus musculus OX=10090 GN=Pilrb2 PE=2 SV=1	18.04	Control_MRlabs	Control_MRlabs
Q60780	Growth arrest-specific protein 7 OS=Mus musculus OX=10090 GN=Gas7 PE=1 SV=1	69.19	Control_MRlabs	Control_MRlabs
Q9Z351	Potassium voltage-gated channel subfamily KQT member 2 OS=Mus musculus OX=10090 GN=Kcnq2 PE=1 SV=1	94.78	Control_MRlabs	Control_MRlabs
Q9Z2T1	Potassium channel subfamily K member 7 OS=Mus musculus OX=10090 GN=Kcnk7 PE=2 SV=3	75.34	Control_MRlabs	Control_MRlabs
Q6Q6R3	Cysteine-rich protein 3 OS=Mus musculus OX=10090 GN=Crip3 PE=2 SV=1	73.32	Control_MRlabs	Control_MRlabs
A2AR95	Low-density lipoprotein receptor class A domain-containing protein 3 OS=Mus musculus OX=10090 GN=Ldlrad3 PE=1 SV=1	48	Control_MRlabs	Control_MRlabs
Q922M3	BTB/POZ domain-containing adapter for CUL3-mediated RhoA degradation protein 3 OS=Mus musculus OX=10090 GN=Kctd10 PE=1 SV=1	8.1	Control_MRlabs	Control_MRlabs
Q3UMM4	Cyclin-dependent kinase 10 OS=Mus musculus OX=10090 GN=Cdk10 PE=1 SV=1	63.74	Control_MRlabs	Control_MRlabs
Q8BPU7	Engulfment and cell motility protein 1 OS=Mus musculus OX=10090 GN=Elmo1 PE=1 SV=2	31.91	Control_MRlabs	Control_MRlabs
Q99LJ0	CTTNBP2 N-terminal-like protein OS=Mus musculus OX=10090 GN=Cttnbp2nl PE=1 SV=1	18.74	Control_MRlabs	Control_MRlabs
E9Q7G0	Nuclear mitotic apparatus protein 1 OS=Mus musculus OX=10090 GN=Numa1 PE=1 SV=1	88.51	Control_MRlabs	Control_MRlabs
A2AQW0	Mitogen-activated protein kinase kinase kinase 15 OS=Mus musculus OX=10090 GN=Map3k15 PE=1 SV=1	35.92	Control_MRlabs	Control_MRlabs
Q9JIP3	Interleukin-17 receptor B OS=Mus musculus OX=10090 GN=Il17rb PE=1 SV=1	3.19	Control_MRlabs	Control_MRlabs
Q5XF89	Probable cation-transporting ATPase 13A3 OS=Mus musculus OX=10090 GN=Atp13a3 PE=1 SV=1	85.94	Control_MRlabs	Control_MRlabs
Q99LI9	Polyribonucleotide 5'-hydroxyl-kinase Clp1 OS=Mus musculus OX=10090 GN=Clp1 PE=1 SV=1	41.31	Control_MRlabs	Control_MRlabs
Q99LI7	Cleavage stimulation factor subunit 3 OS=Mus musculus OX=10090 GN=Cstf3 PE=1 SV=1	45.84	Control_MRlabs	Control_MRlabs
P20357	Microtubule-associated protein 2 OS=Mus musculus OX=10090 GN=Map2 PE=1 SV=2	77.87	Control_MRlabs	Control_MRlabs
Q99LI2	Chloride channel CLIC-like protein 1 OS=Mus musculus OX=10090 GN=Clcc1 PE=1 SV=1	37.48	Control_MRlabs	Control_MRlabs
Q922K9	Tyrosine-protein kinase FRK OS=Mus musculus OX=10090 GN=Frk PE=1 SV=3	31.36	Control_MRlabs	Control_MRlabs
Q60754	Macrophage receptor MARCO OS=Mus musculus OX=10090 GN=Marco PE=1 SV=1	50.07	Control_MRlabs	Control_MRlabs
Q60751	Insulin-like growth factor 1 receptor OS=Mus musculus OX=10090 GN=Igf1r PE=1 SV=3	37.94	Control_MRlabs	Control_MRlabs
Q60750	Ephrin type-A receptor 1 OS=Mus musculus OX=10090 GN=Epha1 PE=1 SV=2	50.67	Control_MRlabs	Control_MRlabs
[truncated: 2,746 more rows]

## Sheet: PD vs PD+Tc group
Accession	Description	Score	Fold change	P values
Q8K440	ATP-binding cassette sub-family A member 8-B OS=Mus musculus OX=10090 GN=Abca8b PE=1 SV=2	4.22	0.0699482	0
P97369	Neutrophil cytosol factor 4 OS=Mus musculus OX=10090 GN=Ncf4 PE=1 SV=2	49.82	0.132655	0
Q6PFX7	Neuronal tyrosine-phosphorylated phosphoinositide-3-kinase adapter 1 OS=Mus musculus OX=10090 GN=Nyap1 PE=1 SV=1	4.91	0.163654	0
P13864	DNA (cytosine-5)-methyltransferase 1 OS=Mus musculus OX=10090 GN=Dnmt1 PE=1 SV=5	44.99	0.214381	0
Q8R1Q0	Syntaxin-19 OS=Mus musculus OX=10090 GN=Stx19 PE=1 SV=1	26.01	0.261846	0.01
Q8R5C8	Zinc finger MYND domain-containing protein 11 OS=Mus musculus OX=10090 GN=Zmynd11 PE=1 SV=2	20.04	0.275271	0
Q8K1K4	Centromere protein I OS=Mus musculus OX=10090 GN=Cenpi PE=2 SV=1	22.85	0.440432	0.03
Q8BZQ7	Anaphase-promoting complex subunit 2 OS=Mus musculus OX=10090 GN=Anapc2 PE=1 SV=2	20.56	0.467666	0
Q8BZ05	Arf-GAP with Rho-GAP domain, ANK repeat and PH domain-containing protein 2 OS=Mus musculus OX=10090 GN=Arap2 PE=1 SV=2	25.48	0.491644	0
Q6PCM1	Lysine-specific demethylase 3A OS=Mus musculus OX=10090 GN=Kdm3a PE=1 SV=1	14.41	0.511709	0.14
Q6NXY9	DNA-directed RNA polymerase III subunit RPC7 OS=Mus musculus OX=10090 GN=Polr3g PE=2 SV=1	270.93	0.532592	0
Q62077	1-phosphatidylinositol 4,5-bisphosphate phosphodiesterase gamma-1 OS=Mus musculus OX=10090 GN=Plcg1 PE=1 SV=2	15.64	0.537944	0.06
O35253	Mothers against decapentaplegic homolog 7 OS=Mus musculus OX=10090 GN=Smad7 PE=1 SV=1	39.84	0.559898	0
Q6P549	Phosphatidylinositol 3,4,5-trisphosphate 5-phosphatase 2 OS=Mus musculus OX=10090 GN=Inppl1 PE=1 SV=1	15.62	0.565525	0.03
Q8VE97	Serine/arginine-rich splicing factor 4 OS=Mus musculus OX=10090 GN=Srsf4 PE=2 SV=1	100.8	0.565525	0
Q9Z280	Phospholipase D1 OS=Mus musculus OX=10090 GN=Pld1 PE=1 SV=1	45.45	0.606531	0.2
Q8R2Q4	Ribosome-releasing factor 2, mitochondrial OS=Mus musculus OX=10090 GN=Gfm2 PE=1 SV=2	24.03	0.612626	0.01
Q60610	T-lymphoma invasion and metastasis-inducing protein 1 OS=Mus musculus OX=10090 GN=Tiam1 PE=1 SV=1	31.11	0.650509	0.07
Q80TQ2	Ubiquitin carboxyl-terminal hydrolase CYLD OS=Mus musculus OX=10090 GN=Cyld PE=1 SV=2	16.8	0.657047	0.03
Q8BRB7	Histone acetyltransferase KAT6B OS=Mus musculus OX=10090 GN=Kat6b PE=1 SV=3	35.08	0.657047	0.02
Q9QY42	Prosaposin receptor GPR37 OS=Mus musculus OX=10090 GN=Gpr37 PE=2 SV=1	10.31	0.66365	0.07
Q64455	Receptor-type tyrosine-protein phosphatase eta OS=Mus musculus OX=10090 GN=Ptprj PE=1 SV=2	7.7	0.66365	0.01
Q9D4D7	Cell cycle control protein 50C OS=Mus musculus OX=10090 GN=Tmem30c PE=2 SV=2	103.13	0.67032	0.36
Q9DBR2	Protein FAM13C OS=Mus musculus OX=10090 GN=Fam13c PE=1 SV=2	3.83	0.677057	0.25
Q9QXL1	Kinesin-like protein KIF21B OS=Mus musculus OX=10090 GN=Kif21b PE=1 SV=2	39.95	0.690734	0.02
O88566	Axin-2 OS=Mus musculus OX=10090 GN=Axin2 PE=1 SV=2	35.56	0.697676	0.01
Q9Z1T6	1-phosphatidylinositol 3-phosphate 5-kinase OS=Mus musculus OX=10090 GN=Pikfyve PE=1 SV=3	13.22	0.718924	0.41
P35761	Dual specificity protein kinase TTK OS=Mus musculus OX=10090 GN=Ttk PE=1 SV=1	42	0.733447	0.25
Q8CJH3	Plexin-B1 OS=Mus musculus OX=10090 GN=Plxnb1 PE=1 SV=2	17.81	0.740818	0.16
Q9JIX8	Apoptotic chromatin condensation inducer in the nucleus OS=Mus musculus OX=10090 GN=Acin1 PE=1 SV=3	23.39	0.748264	0.17
Q3UHU5	Microtubule cross-linking factor 1 OS=Mus musculus OX=10090 GN=Mtcl1 PE=1 SV=1	53.17	0.755784	0.1
A2AGT5	Cytoskeleton-associated protein 5 OS=Mus musculus OX=10090 GN=Ckap5 PE=1 SV=1	28.59	0.755784	0.01
Q8CG03	cGMP-specific 3',5'-cyclic phosphodiesterase OS=Mus musculus OX=10090 GN=Pde5a PE=1 SV=2	10.7	0.771052	0.14
Q9QY06	Unconventional myosin-IXb OS=Mus musculus OX=10090 GN=Myo9b PE=1 SV=2	9.82	0.771052	0.16
P09405	Nucleolin OS=Mus musculus OX=10090 GN=Ncl PE=1 SV=2	36.06	0.786628	0.17
Q99104	Unconventional myosin-Va OS=Mus musculus OX=10090 GN=Myo5a PE=1 SV=2	43.71	0.786628	0.07
Q80TF4	Kelch-like protein 13 OS=Mus musculus OX=10090 GN=Klhl13 PE=2 SV=3	25.29	0.802519	0.18
B2RY04	Dedicator of cytokinesis protein 5 OS=Mus musculus OX=10090 GN=Dock5 PE=1 SV=2	30.79	0.802519	0.09
Q6ZQF0	DNA topoisomerase 2-binding protein 1 OS=Mus musculus OX=10090 GN=Topbp1 PE=1 SV=2	34.44	0.818731	0.31
Q5DW34	Histone-lysine N-methyltransferase EHMT1 OS=Mus musculus OX=10090 GN=Ehmt1 PE=1 SV=2	16.38	0.818731	0.23
Q8BI22	Centrosomal protein of 128 kDa OS=Mus musculus OX=10090 GN=Cep128 PE=1 SV=2	18.74	0.826959	0.27
A2AKG8	Focadhesin OS=Mus musculus OX=10090 GN=Focad PE=1 SV=1	9.77	0.826959	0.26
Q5QNQ9	Collagen alpha-1(XXVII) chain OS=Mus musculus OX=10090 GN=Col27a1 PE=2 SV=1	10.83	0.826959	0.24
Q8VHD8	Hornerin OS=Mus musculus OX=10090 GN=Hrnr PE=1 SV=1	33.4	0.83527	0.41
Q8C115	Pleckstrin homology domain-containing family H member 2 OS=Mus musculus OX=10090 GN=Plekhh2 PE=1 SV=3	20.93	0.852144	0.22
Q80TH2	Erbin OS=Mus musculus OX=10090 GN=Erbin PE=1 SV=3	35.16	0.852144	0.26
A2AG58	BCLAF1 and THRAP3 family member 3 OS=Mus musculus OX=10090 GN=Bclaf3 PE=1 SV=1	36.41	0.852144	0.08
Q9R269	Periplakin OS=Mus musculus OX=10090 GN=Ppl PE=1 SV=1	24.49	0.852144	0.19
Q6A070	TOG array regulator of axonemal microtubules protein 1 OS=Mus musculus OX=10090 GN=Togaram1 PE=1 SV=3	56.03	0.860708	0.2
Q6PCX9	E3 ubiquitin-protein ligase TRIM37 OS=Mus musculus OX=10090 GN=Trim37 PE=1 SV=1	24.41	0.860708	0.36
Q8R418	Endoribonuclease Dicer OS=Mus musculus OX=10090 GN=Dicer1 PE=1 SV=3	7.9	0.869358	0.12
Q8R370	Usher syndrome type-1C protein-binding protein 1 OS=Mus musculus OX=10090 GN=Ushbp1 PE=1 SV=2	18.11	0.878095	0.45
Q9Z1N2	Origin recognition complex subunit 1 OS=Mus musculus OX=10090 GN=Orc1 PE=1 SV=2	26.59	0.88692	0.37
Q7TN83	Synaptotagmin-16 OS=Mus musculus OX=10090 GN=Syt16 PE=1 SV=1	20.64	0.895834	0.3
Q8BZN6	Dedicator of cytokinesis protein 10 OS=Mus musculus OX=10090 GN=Dock10 PE=1 SV=3	18.35	0.904837	0.36
Q9CWT6	Probable ATP-dependent RNA helicase DDX28 OS=Mus musculus OX=10090 GN=Ddx28 PE=2 SV=2	15.03	0.913931	0.37
P59242	Cingulin OS=Mus musculus OX=10090 GN=Cgn PE=1 SV=1	27.18	0.913931	0.39
Q80V72	Inositol hexakisphosphate kinase 2 OS=Mus musculus OX=10090 GN=Ip6k2 PE=2 SV=2	6.91	0.913931	0.36
Q9QXL2	Kinesin-like protein KIF21A OS=Mus musculus OX=10090 GN=Kif21a PE=1 SV=2	23	0.913931	0.33
Q9Z1K7	Adenomatous polyposis coli protein 2 OS=Mus musculus OX=10090 GN=Apc2 PE=1 SV=1	43.66	0.923116	0.34
P97333	Neuropilin-1 OS=Mus musculus OX=10090 GN=Nrp1 PE=1 SV=2	45.49	0.932394	0.42
Q7M6Y6	Maestro heat-like repeat-containing protein family member 2B OS=Mus musculus OX=10090 GN=Mroh2b PE=1 SV=2	65.1	0.932394	0.41
Q69Z37	Sterile alpha motif domain-containing protein 9-like OS=Mus musculus OX=10090 GN=Samd9l PE=1 SV=2	40.92	0.941765	0.39
Q62136	Tyrosine-protein phosphatase non-receptor type 21 OS=Mus musculus OX=10090 GN=Ptpn21 PE=1 SV=1	16.54	0.951229	0.42
Q8K441	ATP-binding cassette sub-family A member 6 OS=Mus musculus OX=10090 GN=Abca6 PE=1 SV=2	21.5	0.951229	0.45
P51432	1-phosphatidylinositol 4,5-bisphosphate phosphodiesterase beta-3 OS=Mus musculus OX=10090 GN=Plcb3 PE=1 SV=2	26.43	0.980199	0.49
Q80VW7	AT-hook-containing transcription factor OS=Mus musculus OX=10090 GN=Akna PE=1 SV=1	17.2	0.980199	0.43
Q3UPC7	Uncharacterized protein KIAA0825 homolog OS=Mus musculus OX=10090 PE=2 SV=3	43.62	0.99005	0.49
Q8C6K9	Collagen alpha-6(VI) chain OS=Mus musculus OX=10090 GN=Col6a6 PE=1 SV=2	24.2	0.99005	0.42
P97386	DNA ligase 3 OS=Mus musculus OX=10090 GN=Lig3 PE=1 SV=2	15.97	1	0.52
Q9D180	Cilia- and flagella-associated protein 57 OS=Mus musculus OX=10090 GN=Cfap57 PE=1 SV=3	56.4	1	0.51
P97868	E3 ubiquitin-protein ligase RBBP6 OS=Mus musculus OX=10090 GN=Rbbp6 PE=1 SV=5	73.01	1	0.5
Q8VDD9	PH-interacting protein OS=Mus musculus OX=10090 GN=Phip PE=1 SV=2	38.39	1.01005	0.6
O35492	Dual specificity protein kinase CLK3 OS=Mus musculus OX=10090 GN=Clk3 PE=1 SV=2	26.68	1.0202	0.58
Q9JM52	Misshapen-like kinase 1 OS=Mus musculus OX=10090 GN=Mink1 PE=1 SV=3	31.69	1.0202	0.67
Q61292	Laminin subunit beta-2 OS=Mus musculus OX=10090 GN=Lamb2 PE=1 SV=2	27.81	1.0202	0.48
Q9CQ76	Nephrocan OS=Mus musculus OX=10090 GN=Nepn PE=1 SV=1	21.03	1.03045	0.52
Q6PFD6	Kinesin-like protein KIF18B OS=Mus musculus OX=10090 GN=Kif18b PE=2 SV=2	12.82	1.03045	0.6
Q8K010	5-oxoprolinase OS=Mus musculus OX=10090 GN=Oplah PE=1 SV=1	27.7	1.03045	0.56
Q6ZQ06	Centrosomal protein of 162 kDa OS=Mus musculus OX=10090 GN=Cep162 PE=1 SV=2	45.8	1.05127	0.51
Q8CGB3	Uveal autoantigen with coiled-coil domains and ankyrin repeats OS=Mus musculus OX=10090 GN=Uaca PE=1 SV=2	47.01	1.05127	0.57
Q6ZQJ5	DNA replication ATP-dependent helicase/nuclease DNA2 OS=Mus musculus OX=10090 GN=Dna2 PE=1 SV=2	21.95	1.06184	0.66
P40201	Chromodomain-helicase-DNA-binding protein 1 OS=Mus musculus OX=10090 GN=Chd1 PE=1 SV=3	19.5	1.06184	0.64
P97500	Myelin transcription factor 1-like protein OS=Mus musculus OX=10090 GN=Myt1l PE=1 SV=3	13.1	1.06184	0.62
Q6DFV3	Rho GTPase-activating protein 21 OS=Mus musculus OX=10090 GN=Arhgap21 PE=1 SV=1	29.15	1.07251	0.62
P97927	Laminin subunit alpha-4 OS=Mus musculus OX=10090 GN=Lama4 PE=1 SV=2	21.02	1.11628	0.66
Q8K4L0	ATP-dependent RNA helicase DDX54 OS=Mus musculus OX=10090 GN=Ddx54 PE=1 SV=1	17.62	1.1275	0.77
Q8VDC1	FYVE and coiled-coil domain-containing protein 1 OS=Mus musculus OX=10090 GN=Fyco1 PE=1 SV=1	11.85	1.1275	0.58
Q8CJ40	Rootletin OS=Mus musculus OX=10090 GN=Crocc PE=1 SV=2	26.95	1.15027	0.75
Q6PDH0	Pleckstrin homology-like domain family B member 1 OS=Mus musculus OX=10090 GN=Phldb1 PE=1 SV=1	10.59	1.15027	0.74
Q6ZPR6	Inhibitor of Bruton tyrosine kinase OS=Mus musculus OX=10090 GN=Ibtk PE=1 SV=3	8.79	1.15027	0.72
Q99L48	60S ribosomal export protein NMD3 OS=Mus musculus OX=10090 GN=Nmd3 PE=1 SV=1	42.64	1.15027	0.67
Q69ZN7	Myoferlin OS=Mus musculus OX=10090 GN=Myof PE=1 SV=2	27.74	1.16183	0.68
Q0P5V2	Sine oculis-binding protein homolog OS=Mus musculus OX=10090 GN=Sobp PE=1 SV=1	81.99	1.17351	0.78
Q4KWH5	1-phosphatidylinositol 4,5-bisphosphate phosphodiesterase eta-1 OS=Mus musculus OX=10090 GN=Plch1 PE=2 SV=1	7.91	1.17351	0.69
Q69ZZ6	Transmembrane and coiled-coil domains protein 1 OS=Mus musculus OX=10090 GN=Tmcc1 PE=1 SV=2	24.91	1.17351	0.59
P49025	Citron Rho-interacting kinase OS=Mus musculus OX=10090 GN=Cit PE=1 SV=3	26.45	1.1853	0.71
Q8VDD5	Myosin-9 OS=Mus musculus OX=10090 GN=Myh9 PE=1 SV=4	12.21	1.19722	0.97
Q8BLR5	PH and SEC7 domain-containing protein 4 OS=Mus musculus OX=10090 GN=Psd4 PE=1 SV=1	55.07	1.19722	0.81
Q8BH53	Cilia- and flagella-associated protein 69 OS=Mus musculus OX=10090 GN=Cfap69 PE=2 SV=1	42.9	1.2214	0.64
Q6QI06	Rapamycin-insensitive companion of mTOR OS=Mus musculus OX=10090 GN=Rictor PE=1 SV=2	32.2	1.23368	1
Q8K442	ATP-binding cassette sub-family A member 8-A OS=Mus musculus OX=10090 GN=Abca8a PE=1 SV=2	7.93	1.27125	0.96
O09046	L-amino-acid oxidase OS=Mus musculus OX=10090 GN=Il4i1 PE=1 SV=1	57.42	1.28403	0.97
Q99LM2	CDK5 regulatory subunit-associated protein 3 OS=Mus musculus OX=10090 GN=Cdk5rap3 PE=1 SV=1	23.86	1.29693	0.83
Q7TPB0	Phospholipid phosphatase-related protein type 3 OS=Mus musculus OX=10090 GN=Plppr3 PE=1 SV=1	12.08	1.29693	0.83
Q8VCK5	Kelch-like protein 20 OS=Mus musculus OX=10090 GN=Klhl20 PE=2 SV=2	18.29	1.30996	0.58
Q922P9	Putative oxidoreductase GLYR1 OS=Mus musculus OX=10090 GN=Glyr1 PE=1 SV=1	41.76	1.34986	0.7
A2CG63	AT-rich interactive domain-containing protein 4B OS=Mus musculus OX=10090 GN=Arid4b PE=1 SV=1	17.55	1.34986	0.88
Q9CSB4	Partitioning defective 3 homolog B OS=Mus musculus OX=10090 GN=Pard3b PE=1 SV=2	22.74	1.36343	0.98
P70662	LIM domain-binding protein 1 OS=Mus musculus OX=10090 GN=Ldb1 PE=1 SV=2	98.61	1.41907	0.86
Q8CGM2	Retinitis pigmentosa 1-like 1 protein OS=Mus musculus OX=10090 GN=Rp1l1 PE=1 SV=1	19.74	1.49182	0.73
A2A690	Protein TANC2 OS=Mus musculus OX=10090 GN=Tanc2 PE=1 SV=1	19.28	1.52196	0.86
P28741	Kinesin-like protein KIF3A OS=Mus musculus OX=10090 GN=Kif3a PE=1 SV=2	32.83	1.55271	0.99
O88444	Adenylate cyclase type 1 OS=Mus musculus OX=10090 GN=Adcy1 PE=1 SV=2	10.16	1.66529	1
Q99LY2	Lysophospholipase D GDPD3 OS=Mus musculus OX=10090 GN=Gdpd3 PE=1 SV=2	34.24	1.80399	0.97
P35436	Glutamate receptor ionotropic, NMDA 2A OS=Mus musculus OX=10090 GN=Grin2a PE=1 SV=2	9	1.81907	0.92
Q9QUQ5	Short transient receptor potential channel 4 OS=Mus musculus OX=10090 GN=Trpc4 PE=1 SV=1	7.04	1.82212	0.92
P31750	RAC-alpha serine/threonine-protein kinase OS=Mus musculus OX=10090 GN=Akt1 PE=1 SV=2	63.32	1.87761	0.81
P40630	Transcription factor A, mitochondrial OS=Mus musculus OX=10090 GN=Tfam PE=1 SV=2	93.78	1.87901	1
Q3UH60	Disco-interacting protein 2 homolog B OS=Mus musculus OX=10090 GN=Dip2b PE=1 SV=1	33.8	2.01375	0.92
Q9DAZ9	Abscission/NoCut checkpoint regulator OS=Mus musculus OX=10090 GN=Zfyve19 PE=1 SV=2	173.52	2.15977	0.96
Q80T11	Usher syndrome type-1G protein homolog OS=Mus musculus OX=10090 GN=Ush1g PE=1 SV=1	17.67	2.4109	0.98
P53762	Aryl hydrocarbon receptor nuclear translocator OS=Mus musculus OX=10090 GN=Arnt PE=1 SV=3	16.58	2.43513	0.91
Q76MZ3	Serine/threonine-protein phosphatase 2A 65 kDa regulatory subunit A alpha isoform OS=Mus musculus OX=10090 GN=Ppp2r1a PE=1 SV=3	10.16	2.53451	0.93
Q8BL66	Early endosome antigen 1 OS=Mus musculus OX=10090 GN=Eea1 PE=1 SV=2	34.06	3.09566	0.86
Q6PFQ7	Ras GTPase-activating protein 4 OS=Mus musculus OX=10090 GN=Rasa4 PE=1 SV=1	30.1	3.22199	1
Q6P9K8	Caskin-1 OS=Mus musculus OX=10090 GN=Caskin1 PE=1 SV=2	11.12	3.28708	1
P70208	Plexin-A3 OS=Mus musculus OX=10090 GN=Plxna3 PE=1 SV=2	13.23	3.59664	1
P70670	Nascent polypeptide-associated complex subunit alpha, muscle-specific form OS=Mus musculus OX=10090 GN=Naca PE=1 SV=2	31.4	7.69061	1
Q5SXJ3	Fanconi anemia group J protein homolog OS=Mus musculus OX=10090 GN=Brip1 PE=2 SV=1	22.12	9.87494	0.07
Q05D44	Eukaryotic translation initiation factor 5B OS=Mus musculus OX=10090 GN=Eif5b PE=1 SV=2	20.03	11.2459	0.08
P21279	Guanine nucleotide-binding protein G(q) subunit alpha OS=Mus musculus OX=10090 GN=Gnaq PE=1 SV=4	26.75	Control_MR_2	Control_MR_2
Q148W8	Inactive dual specificity phosphatase 27 OS=Mus musculus OX=10090 GN=Dusp27 PE=1 SV=1	3.58	Control_MR_2	Control_MR_2
P57110	A disintegrin and metalloproteinase with thrombospondin motifs 8 OS=Mus musculus OX=10090 GN=Adamts8 PE=2 SV=1	12.43	Control_MR_2	Control_MR_2
Q8K296	Myotubularin-related protein 3 OS=Mus musculus OX=10090 GN=Mtmr3 PE=1 SV=2	2.9	Control_MR_2	Control_MR_2
P21271	Unconventional myosin-Vb OS=Mus musculus OX=10090 GN=Myo5b PE=1 SV=2	26.48	Control_MR_2	Control_MR_2
Q8K1X4	Nck-associated protein 1-like OS=Mus musculus OX=10090 GN=Nckap1l PE=1 SV=1	5.16	Control_MR_2	Control_MR_2
Q9D2K4	IQ domain-containing protein H OS=Mus musculus OX=10090 GN=Iqch PE=2 SV=3	50.18	Control_MR_2	Control_MR_2
P09838	DNA nucleotidylexotransferase OS=Mus musculus OX=10090 GN=Dntt PE=1 SV=3	5.14	Control_MR_2	Control_MR_2
Q9CWW7	CXXC-type zinc finger protein 1 OS=Mus musculus OX=10090 GN=Cxxc1 PE=2 SV=1	18.44	Control_MR_2	Control_MR_2
Q3U3V8	X-ray radiation resistance-associated protein 1 OS=Mus musculus OX=10090 GN=Xrra1 PE=2 SV=1	19.71	Control_MR_2	Control_MR_2
Q02384	Son of sevenless homolog 2 OS=Mus musculus OX=10090 GN=Sos2 PE=1 SV=2	20.81	Control_MR_2	Control_MR_2
Q0KK55	Kinase non-catalytic C-lobe domain-containing protein 1 OS=Mus musculus OX=10090 GN=Kndc1 PE=1 SV=2	30.11	Control_MR_2	Control_MR_2
Q8VIB5	BarH-like 2 homeobox protein OS=Mus musculus OX=10090 GN=Barhl2 PE=2 SV=2	46.83	Control_MR_2	Control_MR_2
P25976	Nucleolar transcription factor 1 OS=Mus musculus OX=10090 GN=Ubtf PE=1 SV=1	8.43	Control_MR_2	Control_MR_2
Q5SW75	Protein phosphatase Slingshot homolog 2 OS=Mus musculus OX=10090 GN=Ssh2 PE=1 SV=2	35.93	Control_MR_2	Control_MR_2
Q62252	Sperm surface protein Sp17 OS=Mus musculus OX=10090 GN=Spa17 PE=1 SV=1	10.59	Control_MR_2	Control_MR_2
L0N7N1	Kinesin-like protein KIF14 OS=Mus musculus OX=10090 GN=Kif14 PE=1 SV=1	20.43	Control_MR_2	Control_MR_2
Q9R087	Glypican-6 OS=Mus musculus OX=10090 GN=Gpc6 PE=1 SV=1	14.69	Control_MR_2	Control_MR_2
Q91Z69	SLIT-ROBO Rho GTPase-activating protein 1 OS=Mus musculus OX=10090 GN=Srgap1 PE=1 SV=2	8.27	Control_MR_2	Control_MR_2
Q1HKZ5	Mitogen-activated protein kinase kinase kinase 13 OS=Mus musculus OX=10090 GN=Map3k13 PE=1 SV=1	27.9	Control_MR_2	Control_MR_2
Q148V8	Protein FAM83H OS=Mus musculus OX=10090 GN=Fam83h PE=1 SV=1	28.56	Control_MR_2	Control_MR_2
Q505G8	Zinc finger protein 827 OS=Mus musculus OX=10090 GN=Znf827 PE=1 SV=2	19.03	Control_MR_2	Control_MR_2
Q91Z67	SLIT-ROBO Rho GTPase-activating protein 2 OS=Mus musculus OX=10090 GN=Srgap2 PE=1 SV=2	42.86	Control_MR_2	Control_MR_2
Q8BLI0	ADAMTS-like protein 1 OS=Mus musculus OX=10090 GN=Adamtsl1 PE=2 SV=2	30.79	Control_MR_2	Control_MR_2
Q3U108	AT-rich interactive domain-containing protein 5A OS=Mus musculus OX=10090 GN=Arid5a PE=1 SV=1	7.07	Control_MR_2	Control_MR_2
G3UZ78	Androglobin OS=Mus musculus OX=10090 GN=Adgb PE=1 SV=1	45.07	Control_MR_2	Control_MR_2
Q8VBT1	Beta-taxilin OS=Mus musculus OX=10090 GN=Txlnb PE=1 SV=2	51.77	Control_MR_2	Control_MR_2
Q8R5G7	Arf-GAP with Rho-GAP domain, ANK repeat and PH domain-containing protein 3 OS=Mus musculus OX=10090 GN=Arap3 PE=1 SV=3	4.33	Control_MR_2	Control_MR_2
Q6R0H7	Guanine nucleotide-binding protein G(s) subunit alpha isoforms XLas OS=Mus musculus OX=10090 GN=Gnas PE=1 SV=1	122.49	Control_MR_2	Control_MR_2
Q62245	Son of sevenless homolog 1 OS=Mus musculus OX=10090 GN=Sos1 PE=1 SV=2	13.91	Control_MR_2	Control_MR_2
Q9WTN3	Sterol regulatory element-binding protein 1 OS=Mus musculus OX=10090 GN=Srebf1 PE=1 SV=4	22.73	Control_MR_2	Control_MR_2
Q80U49	Centrosomal protein of 170 kDa protein B OS=Mus musculus OX=10090 GN=Cep170b PE=1 SV=2	31.63	Control_MR_2	Control_MR_2
A2ATD1	Isthmin-1 OS=Mus musculus OX=10090 GN=Ism1 PE=1 SV=1	27.77	Control_MR_2	Control_MR_2
P13366	Granzyme G OS=Mus musculus OX=10090 GN=Gzmg PE=1 SV=1	12.79	Control_MR_2	Control_MR_2
Q62240	Lysine-specific demethylase 5D OS=Mus musculus OX=10090 GN=Kdm5d PE=2 SV=2	28.43	Control_MR_2	Control_MR_2
Q1ERP8	CMRF35-like molecule 9 OS=Mus musculus OX=10090 GN=Cd300lg PE=1 SV=1	38.98	Control_MR_2	Control_MR_2
Q91VN0	Low-density lipoprotein receptor-related protein 5 OS=Mus musculus OX=10090 GN=Lrp5 PE=1 SV=3	12.61	Control_MR_2	Control_MR_2
Q8C0N0	Sperm motility kinase Z OS=Mus musculus OX=10090 GN=Gm4922 PE=2 SV=1	29.09	Control_MR_2	Control_MR_2
P62082	40S ribosomal protein S7 OS=Mus musculus OX=10090 GN=Rps7 PE=2 SV=1	102.72	Control_MR_2	Control_MR_2
Q8BUZ3	Tigger transposable element-derived protein 4 OS=Mus musculus OX=10090 GN=Tigd4 PE=2 SV=1	24.42	Control_MR_2	Control_MR_2
Q3U3T8	WD repeat-containing protein 62 OS=Mus musculus OX=10090 GN=Wdr62 PE=1 SV=2	8.97	Control_MR_2	Control_MR_2
Q9D8U2	Transmembrane protein 41A OS=Mus musculus OX=10090 GN=Tmem41a PE=2 SV=1	68.45	Control_MR_2	Control_MR_2
Q8BYA0	Tubulin-specific chaperone D OS=Mus musculus OX=10090 GN=Tbcd PE=1 SV=1	21.88	Control_MR_2	Control_MR_2
Q9CWU0	Putative ATP-dependent RNA helicase TDRD12 OS=Mus musculus OX=10090 GN=Tdrd12 PE=1 SV=2	14.42	Control_MR_2	Control_MR_2
P31313	Homeobox protein Hox-C11 OS=Mus musculus OX=10090 GN=Hoxc11 PE=2 SV=3	6.1	Control_MR_2	Control_MR_2
Q8R5F7	Interferon-induced helicase C domain-containing protein 1 OS=Mus musculus OX=10090 GN=Ifih1 PE=1 SV=1	11.45	Control_MR_2	Control_MR_2
Q9JKF1	Ras GTPase-activating-like protein IQGAP1 OS=Mus musculus OX=10090 GN=Iqgap1 PE=1 SV=2	22.33	Control_MR_2	Control_MR_2
Q6DYE8	Ectonucleotide pyrophosphatase/phosphodiesterase family member 3 OS=Mus musculus OX=10090 GN=Enpp3 PE=1 SV=2	15.3	Control_MR_2	Control_MR_2
Q62234	Myomesin-1 OS=Mus musculus OX=10090 GN=Myom1 PE=1 SV=2	14.99	Control_MR_2	Control_MR_2
Q5SVT3	Ewing's tumor-associated antigen 1 homolog OS=Mus musculus OX=10090 GN=Etaa1 PE=2 SV=1	6.46	Control_MR_2	Control_MR_2
Q6PE65	G patch domain-containing protein 2-like OS=Mus musculus OX=10090 GN=Gpatch2l PE=1 SV=1	6.84	Control_MR_2	Control_MR_2
Q80TR8	DDB1- and CUL4-associated factor 1 OS=Mus musculus OX=10090 GN=Dcaf1 PE=1 SV=4	9.49	Control_MR_2	Control_MR_2
Q80TR1	Adhesion G protein-coupled receptor L1 OS=Mus musculus OX=10090 GN=Adgrl1 PE=1 SV=2	18.21	Control_MR_2	Control_MR_2
Q9QXH4	Integrin alpha-X OS=Mus musculus OX=10090 GN=Itgax PE=1 SV=1	8.31	Control_MR_2	Control_MR_2
Q0P5X5	Zinc finger B-box domain-containing protein 1 OS=Mus musculus OX=10090 GN=Zbbx PE=1 SV=1	13.79	Control_MR_2	Control_MR_2
Q80X91	Protein FAM110D OS=Mus musculus OX=10090 GN=Fam110d PE=2 SV=2	44.16	Control_MR_2	Control_MR_2
Q8BUY8	G-protein coupled receptor-associated sorting protein 2 OS=Mus musculus OX=10090 GN=Gprasp2 PE=1 SV=2	14.89	Control_MR_2	Control_MR_2
Q02357	Ankyrin-1 OS=Mus musculus OX=10090 GN=Ank1 PE=1 SV=2	12.44	Control_MR_2	Control_MR_2
Q0P5X1	Leucine-rich repeat and IQ domain-containing protein 1 OS=Mus musculus OX=10090 GN=Lrriq1 PE=2 SV=2	28.38	Control_MR_2	Control_MR_2
Q8C0M0	GATOR complex protein WDR59 OS=Mus musculus OX=10090 GN=Wdr59 PE=1 SV=2	39.9	Control_MR_2	Control_MR_2
P40645	Transcription factor SOX-6 OS=Mus musculus OX=10090 GN=Sox6 PE=1 SV=2	139.78	Control_MR_2	Control_MR_2
Q04887	Transcription factor SOX-9 OS=Mus musculus OX=10090 GN=Sox9 PE=1 SV=2	38.59	Control_MR_2	Control_MR_2
G3X9K3	Brefeldin A-inhibited guanine nucleotide-exchange protein 1 OS=Mus musculus OX=10090 GN=Arfgef1 PE=1 SV=1	9.6	Control_MR_2	Control_MR_2
P55264	Adenosine kinase OS=Mus musculus OX=10090 GN=Adk PE=1 SV=2	5.12	Control_MR_2	Control_MR_2
Q80U28	MAP kinase-activating death domain protein OS=Mus musculus OX=10090 GN=Madd PE=1 SV=2	28.91	Control_MR_2	Control_MR_2
Q9R053	Sodium channel protein type 11 subunit alpha OS=Mus musculus OX=10090 GN=Scn11a PE=2 SV=2	11.48	Control_MR_2	Control_MR_2
Q91YR5	Methyltransferase-like protein 13 OS=Mus musculus OX=10090 GN=Mettl13 PE=1 SV=1	26.43	Control_MR_2	Control_MR_2
Q61495	Desmoglein-1-alpha OS=Mus musculus OX=10090 GN=Dsg1a PE=2 SV=2	13.55	Control_MR_2	Control_MR_2
Q80X82	Symplekin OS=Mus musculus OX=10090 GN=Sympk PE=1 SV=1	18.61	Control_MR_2	Control_MR_2
Q8C796	REST corepressor 2 OS=Mus musculus OX=10090 GN=Rcor2 PE=1 SV=1	50.12	Control_MR_2	Control_MR_2
Q0P5W1	Vacuolar protein sorting-associated protein 8 homolog OS=Mus musculus OX=10090 GN=Vps8 PE=1 SV=1	9.84	Control_MR_2	Control_MR_2
Q8VC28	Aldo-keto reductase family 1 member C13 OS=Mus musculus OX=10090 GN=Akr1c13 PE=1 SV=2	13.84	Control_MR_2	Control_MR_2
Q09M02	Cytosolic carboxypeptidase-like protein 5 OS=Mus musculus OX=10090 GN=Agbl5 PE=1 SV=2	6.95	Control_MR_2	Control_MR_2
Q9ESD7	Dysferlin OS=Mus musculus OX=10090 GN=Dysf PE=1 SV=3	11.18	Control_MR_2	Control_MR_2
Q8BID6	Zinc finger and BTB domain-containing protein 46 OS=Mus musculus OX=10090 GN=Zbtb46 PE=1 SV=2	15.11	Control_MR_2	Control_MR_2
Q8CFW7	Coiled-coil and C2 domain-containing protein 2A OS=Mus musculus OX=10090 GN=Cc2d2a PE=1 SV=1	26.87	Control_MR_2	Control_MR_2
Q6DID3	Protein SCAF8 OS=Mus musculus OX=10090 GN=Scaf8 PE=1 SV=1	12.57	Control_MR_2	Control_MR_2
Q6P4T2	U5 small nuclear ribonucleoprotein 200 kDa helicase OS=Mus musculus OX=10090 GN=Snrnp200 PE=1 SV=1	13.29	Control_MR_2	Control_MR_2
Q5PSV9	Mediator of DNA damage checkpoint protein 1 OS=Mus musculus OX=10090 GN=Mdc1 PE=1 SV=1	36.69	Control_MR_2	Control_MR_2
Q5SSL4	Active breakpoint cluster region-related protein OS=Mus musculus OX=10090 GN=Abr PE=1 SV=1	27.09	Control_MR_2	Control_MR_2
Q6P4T1	Sorting nexin-19 OS=Mus musculus OX=10090 GN=Snx19 PE=1 SV=1	6.75	Control_MR_2	Control_MR_2
Q8CFW1	Anoctamin-2 OS=Mus musculus OX=10090 GN=Ano2 PE=1 SV=2	13.17	Control_MR_2	Control_MR_2
A2AMT1	Filensin OS=Mus musculus OX=10090 GN=Bfsp1 PE=1 SV=1	26.25	Control_MR_2	Control_MR_2
Q9R049	E3 ubiquitin-protein ligase AMFR OS=Mus musculus OX=10090 GN=Amfr PE=1 SV=2	61.98	Control_MR_2	Control_MR_2
Q5SVR0	TBC1 domain family member 9B OS=Mus musculus OX=10090 GN=Tbc1d9b PE=1 SV=1	12.79	Control_MR_2	Control_MR_2
P58871	182 kDa tankyrase-1-binding protein OS=Mus musculus OX=10090 GN=Tnks1bp1 PE=1 SV=2	25.97	Control_MR_2	Control_MR_2
Q6PDS3	Sterile alpha and TIR motif-containing protein 1 OS=Mus musculus OX=10090 GN=Sarm1 PE=1 SV=1	19.62	Control_MR_2	Control_MR_2
P16951	Cyclic AMP-dependent transcription factor ATF-2 OS=Mus musculus OX=10090 GN=Atf2 PE=1 SV=2	26.89	Control_MR_2	Control_MR_2
Q0P678	Zinc finger CCCH domain-containing protein 18 OS=Mus musculus OX=10090 GN=Zc3h18 PE=1 SV=1	17.29	Control_MR_2	Control_MR_2
P15508	Spectrin beta chain, erythrocytic OS=Mus musculus OX=10090 GN=Sptb PE=1 SV=4	23.97	Control_MR_2	Control_MR_2
Q91YQ5	Dolichyl-diphosphooligosaccharide--protein glycosyltransferase subunit 1 OS=Mus musculus OX=10090 GN=Rpn1 PE=1 SV=1	19.87	Control_MR_2	Control_MR_2
O55098	Serine/threonine-protein kinase 10 OS=Mus musculus OX=10090 GN=Stk10 PE=1 SV=2	23.26	Control_MR_2	Control_MR_2
Q61122	NGFI-A-binding protein 1 OS=Mus musculus OX=10090 GN=Nab1 PE=1 SV=2	32.96	Control_MR_2	Control_MR_2
Q8K243	E3 ubiquitin-protein ligase TRIM68 OS=Mus musculus OX=10090 GN=Trim68 PE=2 SV=1	68.49	Control_MR_2	Control_MR_2
Q9CQF4	Uncharacterized protein C6orf203 homolog OS=Mus musculus OX=10090 PE=1 SV=1	10.5	Control_MR_2	Control_MR_2
Q9CWR8	DNA (cytosine-5)-methyltransferase 3-like OS=Mus musculus OX=10090 GN=Dnmt3l PE=1 SV=1	43.25	Control_MR_2	Control_MR_2
Q9CWR7	Metalloreductase STEAP1 OS=Mus musculus OX=10090 GN=Steap1 PE=1 SV=2	66.71	Control_MR_2	Control_MR_2
Q8K1S1	Leucine-rich repeat LGI family member 4 OS=Mus musculus OX=10090 GN=Lgi4 PE=1 SV=1	2.61	Control_MR_2	Control_MR_2
Q3U0K8	Prolyl 3-hydroxylase OGFOD1 OS=Mus musculus OX=10090 GN=Ogfod1 PE=1 SV=1	14.67	Control_MR_2	Control_MR_2
Q9DBE9	pre-rRNA processing protein FTSJ3 OS=Mus musculus OX=10090 GN=Ftsj3 PE=1 SV=1	21.98	Control_MR_2	Control_MR_2
Q8BLI4	Dermatan-sulfate epimerase OS=Mus musculus OX=10090 GN=Dse PE=2 SV=1	18.48	Control_MR_2	Control_MR_2
Q8VC12	Urocanate hydratase OS=Mus musculus OX=10090 GN=Uroc1 PE=1 SV=2	12.38	Control_MR_2	Control_MR_2
Q8CD15	Ribosomal oxygenase 2 OS=Mus musculus OX=10090 GN=Riox2 PE=1 SV=2	62.76	Control_MR_2	Control_MR_2
Q6ZQK0	Condensin-2 complex subunit D3 OS=Mus musculus OX=10090 GN=Ncapd3 PE=1 SV=3	24.69	Control_MR_2	Control_MR_2
Q6DIC0	Probable global transcription activator SNF2L2 OS=Mus musculus OX=10090 GN=Smarca2 PE=1 SV=1	26.4	Control_MR_2	Control_MR_2
Q62205	Sodium channel protein type 9 subunit alpha OS=Mus musculus OX=10090 GN=Scn9a PE=1 SV=2	7.88	Control_MR_2	Control_MR_2
P58501	PAX3- and PAX7-binding protein 1 OS=Mus musculus OX=10090 GN=Paxbp1 PE=1 SV=3	94.55	Control_MR_2	Control_MR_2
Q6NS57	Mitogen-activated protein kinase-binding protein 1 OS=Mus musculus OX=10090 GN=Mapkbp1 PE=1 SV=1	24.37	Control_MR_2	Control_MR_2
Q64739	Collagen alpha-2(XI) chain OS=Mus musculus OX=10090 GN=Col11a2 PE=2 SV=3	24.06	Control_MR_2	Control_MR_2
Q91VJ5	Polyglutamine-binding protein 1 OS=Mus musculus OX=10090 GN=Pqbp1 PE=1 SV=1	56.67	Control_MR_2	Control_MR_2
E5FYH1	Protein TOPAZ1 OS=Mus musculus OX=10090 GN=Topaz1 PE=2 SV=1	60.18	Control_MR_2	Control_MR_2
O08539	Myc box-dependent-interacting protein 1 OS=Mus musculus OX=10090 GN=Bin1 PE=1 SV=1	47.39	Control_MR_2	Control_MR_2
Q61475	Complement decay-accelerating factor, GPI-anchored OS=Mus musculus OX=10090 GN=Cd55 PE=1 SV=2	23.61	Control_MR_2	Control_MR_2
Q924D0	Reticulon-4-interacting protein 1, mitochondrial OS=Mus musculus OX=10090 GN=Rtn4ip1 PE=1 SV=2	54.54	Control_MR_2	Control_MR_2
Q8BUV8	Protein GPR107 OS=Mus musculus OX=10090 GN=Gpr107 PE=1 SV=2	40.01	Control_MR_2	Control_MR_2
Q3UPI1	Protein FAM198B OS=Mus musculus OX=10090 GN=Fam198b PE=2 SV=1	83.09	Control_MR_2	Control_MR_2
Q8K596	Sodium/calcium exchanger 2 OS=Mus musculus OX=10090 GN=Slc8a2 PE=1 SV=1	27.38	Control_MR_2	Control_MR_2
Q8K1R3	Polyribonucleotide nucleotidyltransferase 1, mitochondrial OS=Mus musculus OX=10090 GN=Pnpt1 PE=1 SV=1	19.23	Control_MR_2	Control_MR_2
P70295	Ancient ubiquitous protein 1 OS=Mus musculus OX=10090 GN=Aup1 PE=1 SV=1	102.31	Control_MR_2	Control_MR_2
A2APX8	Sodium channel protein type 1 subunit alpha OS=Mus musculus OX=10090 GN=Scn1a PE=1 SV=1	19.28	Control_MR_2	Control_MR_2
Q9DBD2	E3 ubiquitin-protein ligase MARCH8 OS=Mus musculus OX=10090 GN=March8 PE=2 SV=1	50.17	Control_MR_2	Control_MR_2
Q2TB54	High affinity immunoglobulin alpha and immunoglobulin mu Fc receptor OS=Mus musculus OX=10090 GN=Fcamr PE=1 SV=2	13.31	Control_MR_2	Control_MR_2
Q3UMB9	WASH complex subunit 4 OS=Mus musculus OX=10090 GN=Washc4 PE=1 SV=2	22.08	Control_MR_2	Control_MR_2
Q6NS46	Protein RRP5 homolog OS=Mus musculus OX=10090 GN=Pdcd11 PE=1 SV=2	20.73	Control_MR_2	Control_MR_2
Q4VBD2	Transmembrane anterior posterior transformation protein 1 OS=Mus musculus OX=10090 GN=Tapt1 PE=1 SV=2	4.93	Control_MR_2	Control_MR_2
Q9Z0Y7	Insulin receptor substrate 4 OS=Mus musculus OX=10090 GN=Irs4 PE=1 SV=2	20.37	Control_MR_2	Control_MR_2
Q6NS45	Coiled-coil domain-containing protein 66 OS=Mus musculus OX=10090 GN=Ccdc66 PE=1 SV=3	53.29	Control_MR_2	Control_MR_2
Q6PDQ2	Chromodomain-helicase-DNA-binding protein 4 OS=Mus musculus OX=10090 GN=Chd4 PE=1 SV=1	33.63	Control_MR_2	Control_MR_2
Q3UPH7	Rho guanine nucleotide exchange factor 40 OS=Mus musculus OX=10090 GN=Arhgef40 PE=1 SV=1	18.44	Control_MR_2	Control_MR_2
Q64727	Vinculin OS=Mus musculus OX=10090 GN=Vcl PE=1 SV=4	54.56	Control_MR_2	Control_MR_2
Q61467	Zinc finger protein ZIC 4 OS=Mus musculus OX=10090 GN=Zic4 PE=1 SV=2	1.59	Control_MR_2	Control_MR_2
Q9R020	Zinc finger Ran-binding domain-containing protein 2 OS=Mus musculus OX=10090 GN=Zranb2 PE=1 SV=2	50.29	Control_MR_2	Control_MR_2
Q61466	SWI/SNF-related matrix-associated actin-dependent regulator of chromatin subfamily D member 1 OS=Mus musculus OX=10090 GN=Smarcd1 PE=1 SV=3	6.64	Control_MR_2	Control_MR_2
Q924C1	Exportin-5 OS=Mus musculus OX=10090 GN=Xpo5 PE=1 SV=1	2.01	Control_MR_2	Control_MR_2
Q80X50	Ubiquitin-associated protein 2-like OS=Mus musculus OX=10090 GN=Ubap2l PE=1 SV=1	18.39	Control_MR_2	Control_MR_2
Q80WT0	Junctophilin-4 OS=Mus musculus OX=10090 GN=Jph4 PE=2 SV=1	22.39	Control_MR_2	Control_MR_2
P48787	Troponin I, cardiac muscle OS=Mus musculus OX=10090 GN=Tnni3 PE=1 SV=2	51.06	Control_MR_2	Control_MR_2
P06869	Urokinase-type plasminogen activator OS=Mus musculus OX=10090 GN=Plau PE=1 SV=1	24.03	Control_MR_2	Control_MR_2
P56677	Suppressor of tumorigenicity 14 protein homolog OS=Mus musculus OX=10090 GN=St14 PE=1 SV=2	14.92	Control_MR_2	Control_MR_2
D3YU32	Testis-expressed protein 13C-1 OS=Mus musculus OX=10090 GN=Tex13c1 PE=3 SV=1	17.65	Control_MR_2	Control_MR_2
Q6P7W5	tRNA-splicing endonuclease subunit Sen2 OS=Mus musculus OX=10090 GN=Tsen2 PE=1 SV=1	42.77	Control_MR_2	Control_MR_2
Q80TM9	Nischarin OS=Mus musculus OX=10090 GN=Nisch PE=1 SV=2	28.62	Control_MR_2	Control_MR_2
Q9R016	Baculoviral IAP repeat-containing protein 1e OS=Mus musculus OX=10090 GN=Naip5 PE=1 SV=3	29.81	Control_MR_2	Control_MR_2
Q8BRN9	Coiled-coil and C2 domain-containing protein 1B OS=Mus musculus OX=10090 GN=Cc2d1b PE=1 SV=1	11.33	Control_MR_2	Control_MR_2
Q80X44	Zinc finger and BTB domain-containing protein 24 OS=Mus musculus OX=10090 GN=Zbtb24 PE=1 SV=1	15.89	Control_MR_2	Control_MR_2
Q80X41	Serine/threonine-protein kinase VRK1 OS=Mus musculus OX=10090 GN=Vrk1 PE=1 SV=2	14.9	Control_MR_2	Control_MR_2
P70279	Surfeit locus protein 6 OS=Mus musculus OX=10090 GN=Surf6 PE=1 SV=1	78.76	Control_MR_2	Control_MR_2
P20108	Thioredoxin-dependent peroxide reductase, mitochondrial OS=Mus musculus OX=10090 GN=Prdx3 PE=1 SV=1	208.52	Control_MR_2	Control_MR_2
Q6ZQH8	Nucleoporin NUP188 homolog OS=Mus musculus OX=10090 GN=Nup188 PE=1 SV=2	3.72	Control_MR_2	Control_MR_2
Q9D902	General transcription factor IIE subunit 2 OS=Mus musculus OX=10090 GN=Gtf2e2 PE=1 SV=2	31.57	Control_MR_2	Control_MR_2
Q8BXZ1	Protein disulfide-isomerase TMX3 OS=Mus musculus OX=10090 GN=Tmx3 PE=1 SV=2	87.75	Control_MR_2	Control_MR_2
P70270	DNA repair and recombination protein RAD54-like OS=Mus musculus OX=10090 GN=Rad54l PE=1 SV=2	15.81	Control_MR_2	Control_MR_2
P97490	Adenylate cyclase type 8 OS=Mus musculus OX=10090 GN=Adcy8 PE=1 SV=2	34.65	Control_MR_2	Control_MR_2
Q99K74	Mediator of RNA polymerase II transcription subunit 24 OS=Mus musculus OX=10090 GN=Med24 PE=1 SV=1	21.55	Control_MR_2	Control_MR_2
Q80TL7	Protein MON2 homolog OS=Mus musculus OX=10090 GN=Mon2 PE=1 SV=2	12.93	Control_MR_2	Control_MR_2
P63101	14-3-3 protein zeta/delta OS=Mus musculus OX=10090 GN=Ywhaz PE=1 SV=1	63.69	Control_MR_2	Control_MR_2
Q6NV83	U2 snRNP-associated SURP motif-containing protein OS=Mus musculus OX=10090 GN=U2surp PE=1 SV=3	61.46	Control_MR_2	Control_MR_2
Q8BHZ4	Zinc finger protein 592 OS=Mus musculus OX=10090 GN=Znf592 PE=1 SV=3	41.89	Control_MR_2	Control_MR_2
Q9Z180	SET-binding protein OS=Mus musculus OX=10090 GN=Setbp1 PE=1 SV=4	10.37	Control_MR_2	Control_MR_2
Q64700	Retinoblastoma-like protein 2 OS=Mus musculus OX=10090 GN=Rbl2 PE=1 SV=3	52.84	Control_MR_2	Control_MR_2
Q3UVR3	Tau-tubulin kinase 2 OS=Mus musculus OX=10090 GN=Ttbk2 PE=1 SV=1	57.99	Control_MR_2	Control_MR_2
Q8K202	DNA-directed RNA polymerase I subunit RPA49 OS=Mus musculus OX=10090 GN=Polr1e PE=1 SV=2	83.51	Control_MR_2	Control_MR_2
P39429	TNF receptor-associated factor 2 OS=Mus musculus OX=10090 GN=Traf2 PE=1 SV=1	4.49	Control_MR_2	Control_MR_2
Q8BV42	Zinc finger protein 786 OS=Mus musculus OX=10090 GN=Znf786 PE=2 SV=1	34.17	Control_MR_2	Control_MR_2
Q8K561	Otoancorin OS=Mus musculus OX=10090 GN=Otoa PE=2 SV=1	6.59	Control_MR_2	Control_MR_2
P59913	Protein-L-isoaspartate O-methyltransferase domain-containing protein 1 OS=Mus musculus OX=10090 GN=Pcmtd1 PE=1 SV=1	9.18	Control_MR_2	Control_MR_2
P28271	Cytoplasmic aconitate hydratase OS=Mus musculus OX=10090 GN=Aco1 PE=1 SV=3	15.37	Control_MR_2	Control_MR_2
P97484	Leukocyte immunoglobulin-like receptor subfamily B member 3 OS=Mus musculus OX=10090 GN=Lilrb3 PE=1 SV=1	34.73	Control_MR_2	Control_MR_2
Q80WQ6	Inactive rhomboid protein 2 OS=Mus musculus OX=10090 GN=Rhbdf2 PE=1 SV=1	13.94	Control_MR_2	Control_MR_2
Q812E0	Cytoplasmic polyadenylation element-binding protein 2 OS=Mus musculus OX=10090 GN=Cpeb2 PE=1 SV=1	18.36	Control_MR_2	Control_MR_2
Q80TK0	Uncharacterized protein KIAA1107 OS=Mus musculus OX=10090 GN=Kiaa1107 PE=1 SV=5	6.34	Control_MR_2	Control_MR_2
Q91YL3	Uridine-cytidine kinase-like 1 OS=Mus musculus OX=10090 GN=Uckl1 PE=1 SV=1	4.3	Control_MR_2	Control_MR_2
Q05909	Receptor-type tyrosine-protein phosphatase gamma OS=Mus musculus OX=10090 GN=Ptprg PE=1 SV=1	23.44	Control_MR_2	Control_MR_2
Q8K1N2	Pleckstrin homology-like domain family B member 2 OS=Mus musculus OX=10090 GN=Phldb2 PE=1 SV=2	27.67	Control_MR_2	Control_MR_2
Q5SFM8	RNA-binding protein 27 OS=Mus musculus OX=10090 GN=Rbm27 PE=1 SV=3	23.35	Control_MR_2	Control_MR_2
P48754	Breast cancer type 1 susceptibility protein homolog OS=Mus musculus OX=10090 GN=Brca1 PE=1 SV=3	24.11	Control_MR_2	Control_MR_2
Q9D8M4	60S ribosomal protein L7-like 1 OS=Mus musculus OX=10090 GN=Rpl7l1 PE=1 SV=1	60.83	Control_MR_2	Control_MR_2
Q8R1W8	Interphotoreceptor matrix proteoglycan 1 OS=Mus musculus OX=10090 GN=Impg1 PE=1 SV=1	37.6	Control_MR_2	Control_MR_2
Q5DTZ0	Protein NYNRIN OS=Mus musculus OX=10090 GN=Nynrin PE=2 SV=2	15.36	Control_MR_2	Control_MR_2
P59900	EMILIN-3 OS=Mus musculus OX=10090 GN=Emilin3 PE=2 SV=1	103.6	Control_MR_2	Control_MR_2
Q5FW85	Extracellular matrix protein 2 OS=Mus musculus OX=10090 GN=Ecm2 PE=1 SV=1	27.56	Control_MR_2	Control_MR_2
A2ASZ8	Calcium-binding mitochondrial carrier protein SCaMC-2 OS=Mus musculus OX=10090 GN=Slc25a25 PE=1 SV=1	6.05	Control_MR_2	Control_MR_2
Q5SVL6	Rap1 GTPase-activating protein 2 OS=Mus musculus OX=10090 GN=Rap1gap2 PE=1 SV=1	37.87	Control_MR_2	Control_MR_2
Q3UFQ8	Capping protein, Arp2/3 and myosin-I linker protein 3 OS=Mus musculus OX=10090 GN=Carmil3 PE=1 SV=2	41.69	Control_MR_2	Control_MR_2
Q80TJ7	Histone lysine demethylase PHF8 OS=Mus musculus OX=10090 GN=Phf8 PE=1 SV=2	15.18	Control_MR_2	Control_MR_2
Q3V1D3	AMP deaminase 1 OS=Mus musculus OX=10090 GN=Ampd1 PE=1 SV=2	25.17	Control_MR_2	Control_MR_2
Q8C729	Protein FAM126B OS=Mus musculus OX=10090 GN=Fam126b PE=1 SV=1	1.49	Control_MR_2	Control_MR_2
Q76LL6	FH1/FH2 domain-containing protein 3 OS=Mus musculus OX=10090 GN=Fhod3 PE=1 SV=1	58.3	Control_MR_2	Control_MR_2
Q8K1M6	Dynamin-1-like protein OS=Mus musculus OX=10090 GN=Dnm1l PE=1 SV=2	24.88	Control_MR_2	Control_MR_2
Q3UYV8	Dynein assembly factor 3, axonemal OS=Mus musculus OX=10090 GN=Dnaaf3 PE=1 SV=1	13.14	Control_MR_2	Control_MR_2
Q91YK2	Ribosomal RNA processing protein 1 homolog B OS=Mus musculus OX=10090 GN=Rrp1b PE=1 SV=2	109.04	Control_MR_2	Control_MR_2
Q91YK0	Leucine-rich repeat-containing protein 49 OS=Mus musculus OX=10090 GN=Lrrc49 PE=1 SV=1	52.95	Control_MR_2	Control_MR_2
O55033	Cytoplasmic protein NCK2 OS=Mus musculus OX=10090 GN=Nck2 PE=1 SV=1	41.54	Control_MR_2	Control_MR_2
Q9EP75	Leukotriene-B4 omega-hydroxylase 3 OS=Mus musculus OX=10090 GN=Cyp4f14 PE=1 SV=1	20.42	Control_MR_2	Control_MR_2
Q8VI75	Importin-4 OS=Mus musculus OX=10090 GN=Ipo4 PE=1 SV=1	14.16	Control_MR_2	Control_MR_2
Q8CG16	Complement C1r-A subcomponent OS=Mus musculus OX=10090 GN=C1ra PE=1 SV=1	21.05	Control_MR_2	Control_MR_2
Q9EP71	Ankycorbin OS=Mus musculus OX=10090 GN=Rai14 PE=1 SV=1	5.9	Control_MR_2	Control_MR_2
Q6P1G2	Lysine-specific demethylase 2B OS=Mus musculus OX=10090 GN=Kdm2b PE=1 SV=1	22.45	Control_MR_2	Control_MR_2
Q6P1G0	HEAT repeat-containing protein 6 OS=Mus musculus OX=10090 GN=Heatr6 PE=1 SV=1	2.34	Control_MR_2	Control_MR_2
Q5XKE0	Myosin-binding protein C, fast-type OS=Mus musculus OX=10090 GN=Mybpc2 PE=1 SV=1	15.8	Control_MR_2	Control_MR_2
Q8BI84	Transport and Golgi organization protein 1 homolog OS=Mus musculus OX=10090 GN=Mia3 PE=1 SV=2	26.66	Control_MR_2	Control_MR_2
Q80ZU5	Coiled-coil domain-containing protein 181 OS=Mus musculus OX=10090 GN=Ccdc181 PE=1 SV=1	20.51	Control_MR_2	Control_MR_2
Q80TI1	Pleckstrin homology domain-containing family H member 1 OS=Mus musculus OX=10090 GN=Plekhh1 PE=1 SV=2	6.35	Control_MR_2	Control_MR_2
Q7TS63	Zinc finger protein ZFAT OS=Mus musculus OX=10090 GN=Zfat PE=1 SV=2	39.91	Control_MR_2	Control_MR_2
Q3LAC4	Phosphatidylinositol 3,4,5-trisphosphate-dependent Rac exchanger 2 protein OS=Mus musculus OX=10090 GN=Prex2 PE=1 SV=2	22.9	Control_MR_2	Control_MR_2
P01027	Complement C3 OS=Mus musculus OX=10090 GN=C3 PE=1 SV=3	13.98	Control_MR_2	Control_MR_2
Q8N7N5	DDB1- and CUL4-associated factor 8 OS=Mus musculus OX=10090 GN=Dcaf8 PE=1 SV=1	31.49	Control_MR_2	Control_MR_2
Q6A051	Attractin-like protein 1 OS=Mus musculus OX=10090 GN=Atrnl1 PE=1 SV=2	10.44	Control_MR_2	Control_MR_2
Q6V3W6	Dynein regulatory complex subunit 7 OS=Mus musculus OX=10090 GN=Drc7 PE=1 SV=4	54.37	Control_MR_2	Control_MR_2
Q6URW6	Myosin-14 OS=Mus musculus OX=10090 GN=Myh14 PE=1 SV=1	29.45	Control_MR_2	Control_MR_2
Q61410	cGMP-dependent protein kinase 2 OS=Mus musculus OX=10090 GN=Prkg2 PE=1 SV=1	21.41	Control_MR_2	Control_MR_2
Q8K1L0	Cyclic AMP-responsive element-binding protein 5 OS=Mus musculus OX=10090 GN=Creb5 PE=2 SV=3	22.7	Control_MR_2	Control_MR_2
P97454	Mothers against decapentaplegic homolog 5 OS=Mus musculus OX=10090 GN=Smad5 PE=1 SV=2	21.53	Control_MR_2	Control_MR_2
P02468	Laminin subunit gamma-1 OS=Mus musculus OX=10090 GN=Lamc1 PE=1 SV=2	22.87	Control_MR_2	Control_MR_2
Q3USH5	Splicing factor, suppressor of white-apricot homolog OS=Mus musculus OX=10090 GN=Sfswap PE=1 SV=2	23.6	Control_MR_2	Control_MR_2
Q8C0C4	Serine-rich coiled-coil domain-containing protein 1 OS=Mus musculus OX=10090 GN=Ccser1 PE=2 SV=2	17.1	Control_MR_2	Control_MR_2
Q3UZ57	Axonemal dynein light chain domain-containing protein 1 OS=Mus musculus OX=10090 GN=Axdnd1 PE=1 SV=1	6.72	Control_MR_2	Control_MR_2
Q61765	Keratin, type I cuticular Ha1 OS=Mus musculus OX=10090 GN=Krt31 PE=1 SV=2	25.26	Control_MR_2	Control_MR_2
Q5DTW7	Uncharacterized protein KIAA1551 OS=Mus musculus OX=10090 GN=Kiaa1551 PE=1 SV=2	52.04	Control_MR_2	Control_MR_2
Q9JJZ9	Cyclic nucleotide-gated cation channel beta-3 OS=Mus musculus OX=10090 GN=Cngb3 PE=1 SV=1	7.26	Control_MR_2	Control_MR_2
D3Z5L9	WNT1-inducible-signaling pathway protein 3 OS=Mus musculus OX=10090 GN=Wisp3 PE=3 SV=2	14.21	Control_MR_2	Control_MR_2
P48722	Heat shock 70 kDa protein 4L OS=Mus musculus OX=10090 GN=Hspa4l PE=1 SV=2	30.66	Control_MR_2	Control_MR_2
Q60676	Serine/threonine-protein phosphatase 5 OS=Mus musculus OX=10090 GN=Ppp5c PE=1 SV=3	33.68	Control_MR_2	Control_MR_2
P28230	Gap junction beta-1 protein OS=Mus musculus OX=10090 GN=Gjb1 PE=1 SV=3	46.52	Control_MR_2	Control_MR_2
A2AQ25	Sickle tail protein OS=Mus musculus OX=10090 GN=Skt PE=1 SV=1	42.99	Control_MR_2	Control_MR_2
E9Q7D5	Rho guanine nucleotide exchange factor 5 OS=Mus musculus OX=10090 GN=Arhgef5 PE=1 SV=1	32.59	Control_MR_2	Control_MR_2
Q8CIT0	Corticoliberin OS=Mus musculus OX=10090 GN=Crh PE=2 SV=1	16.5	Control_MR_2	Control_MR_2
Q80TG9	Leucine-rich repeat and fibronectin type-III domain-containing protein 2 OS=Mus musculus OX=10090 GN=Lrfn2 PE=1 SV=2	2.9	Control_MR_2	Control_MR_2
E9PVD1	Coiled-coil domain-containing protein 62 OS=Mus musculus OX=10090 GN=Ccdc62 PE=3 SV=1	19.59	Control_MR_2	Control_MR_2
Q812A2	SLIT-ROBO Rho GTPase-activating protein 3 OS=Mus musculus OX=10090 GN=Srgap3 PE=1 SV=1	8.1	Control_MR_2	Control_MR_2
O89032	SH3 and PX domain-containing protein 2A OS=Mus musculus OX=10090 GN=Sh3pxd2a PE=1 SV=2	17.87	Control_MR_2	Control_MR_2
Q80TG1	KAT8 regulatory NSL complex subunit 1 OS=Mus musculus OX=10090 GN=Kansl1 PE=1 SV=1	29.12	Control_MR_2	Control_MR_2
Q8BUN5	Mothers against decapentaplegic homolog 3 OS=Mus musculus OX=10090 GN=Smad3 PE=1 SV=2	78.24	Control_MR_2	Control_MR_2
P62325	Protein BTG1 OS=Mus musculus OX=10090 GN=Btg1 PE=1 SV=1	35.18	Control_MR_2	Control_MR_2
Q8K4P0	pre-mRNA 3' end processing protein WDR33 OS=Mus musculus OX=10090 GN=Wdr33 PE=1 SV=1	15.14	Control_MR_2	Control_MR_2
Q9CWI3	BRCA2 and CDKN1A-interacting protein OS=Mus musculus OX=10090 GN=Bccip PE=1 SV=1	195.95	Control_MR_2	Control_MR_2
P53349	Mitogen-activated protein kinase kinase kinase 1 OS=Mus musculus OX=10090 GN=Map3k1 PE=1 SV=3	8.82	Control_MR_2	Control_MR_2
Q60662	A-kinase anchor protein 4 OS=Mus musculus OX=10090 GN=Akap4 PE=1 SV=1	25.8	Control_MR_2	Control_MR_2
Q8CIS0	Caspase recruitment domain-containing protein 11 OS=Mus musculus OX=10090 GN=Card11 PE=1 SV=2	18.76	Control_MR_2	Control_MR_2
Q99MV7	RING finger protein 17 OS=Mus musculus OX=10090 GN=Rnf17 PE=1 SV=2	17.59	Control_MR_2	Control_MR_2
Q6PH08	ERC protein 2 OS=Mus musculus OX=10090 GN=Erc2 PE=1 SV=2	31.05	Control_MR_2	Control_MR_2
Q3UFM5	Nucleolar MIF4G domain-containing protein 1 OS=Mus musculus OX=10090 GN=Nom1 PE=1 SV=2	98.23	Control_MR_2	Control_MR_2
Q6PDI5	Proteasome adapter and scaffold protein ECM29 OS=Mus musculus OX=10090 GN=Ecpas PE=1 SV=3	18.36	Control_MR_2	Control_MR_2
Q99MV5	RNA helicase Mov10l1 OS=Mus musculus OX=10090 GN=Mov10l1 PE=1 SV=1	18.41	Control_MR_2	Control_MR_2
P70207	Plexin-A2 OS=Mus musculus OX=10090 GN=Plxna2 PE=1 SV=2	13.69	Control_MR_2	Control_MR_2
P70206	Plexin-A1 OS=Mus musculus OX=10090 GN=Plxna1 PE=1 SV=1	27.3	Control_MR_2	Control_MR_2
D3YZV8	Coiled-coil domain-containing protein 8 homolog OS=Mus musculus OX=10090 GN=Ccdc8 PE=1 SV=2	11.85	Control_MR_2	Control_MR_2
Q00PI9	Heterogeneous nuclear ribonucleoprotein U-like protein 2 OS=Mus musculus OX=10090 GN=Hnrnpul2 PE=1 SV=2	66.43	Control_MR_2	Control_MR_2
Q9Z0P4	Paralemmin-1 OS=Mus musculus OX=10090 GN=Palm PE=1 SV=1	16.28	Control_MR_2	Control_MR_2
Q61739	Integrin alpha-6 OS=Mus musculus OX=10090 GN=Itga6 PE=1 SV=3	60.96	Control_MR_2	Control_MR_2
Q80TE0	RNA polymerase II-associated protein 1 OS=Mus musculus OX=10090 GN=Rpap1 PE=1 SV=2	14.64	Control_MR_2	Control_MR_2
Q8BXR9	Oxysterol-binding protein-related protein 6 OS=Mus musculus OX=10090 GN=Osbpl6 PE=1 SV=1	7.48	Control_MR_2	Control_MR_2
Q2VPA6	Helicase POLQ-like OS=Mus musculus OX=10090 GN=Helq PE=1 SV=2	23.21	Control_MR_2	Control_MR_2
Q5DTT2	PH and SEC7 domain-containing protein 1 OS=Mus musculus OX=10090 GN=Psd PE=1 SV=2	15.87	Control_MR_2	Control_MR_2
Q8CIQ7	Dedicator of cytokinesis protein 3 OS=Mus musculus OX=10090 GN=Dock3 PE=1 SV=1	50.3	Control_MR_2	Control_MR_2
Q8CFK2	Transcription factor IIIB 90 kDa subunit OS=Mus musculus OX=10090 GN=Brf1 PE=1 SV=1	36.38	Control_MR_2	Control_MR_2
D3YZU1	SH3 and multiple ankyrin repeat domains protein 1 OS=Mus musculus OX=10090 GN=Shank1 PE=1 SV=1	31.03	Control_MR_2	Control_MR_2
Q9Z108	Double-stranded RNA-binding protein Staufen homolog 1 OS=Mus musculus OX=10090 GN=Stau1 PE=1 SV=1	124.74	Control_MR_2	Control_MR_2
Q6PDG5	SWI/SNF complex subunit SMARCC2 OS=Mus musculus OX=10090 GN=Smarcc2 PE=1 SV=2	15.81	Control_MR_2	Control_MR_2
Q6A009	E3 ubiquitin-protein ligase listerin OS=Mus musculus OX=10090 GN=Ltn1 PE=1 SV=3	20.2	Control_MR_2	Control_MR_2
Q80WJ6	Multidrug resistance-associated protein 9 OS=Mus musculus OX=10090 GN=Abcc12 PE=2 SV=1	95.85	Control_MR_2	Control_MR_2
Q9QWY8	Arf-GAP with SH3 domain, ANK repeat and PH domain-containing protein 1 OS=Mus musculus OX=10090 GN=Asap1 PE=1 SV=2	11.09	Control_MR_2	Control_MR_2
Q9Z103	Activity-dependent neuroprotector homeobox protein OS=Mus musculus OX=10090 GN=Adnp PE=1 SV=2	17.05	Control_MR_2	Control_MR_2
Q91YE7	RNA-binding protein 5 OS=Mus musculus OX=10090 GN=Rbm5 PE=1 SV=1	25.48	Control_MR_2	Control_MR_2
Q920R0	Alsin OS=Mus musculus OX=10090 GN=Als2 PE=1 SV=3	11.15	Control_MR_2	Control_MR_2
Q3UZ18	Little elongation complex subunit 2 OS=Mus musculus OX=10090 GN=Ice2 PE=1 SV=2	47.03	Control_MR_2	Control_MR_2
Q8K1G2	Limbin OS=Mus musculus OX=10090 GN=Evc2 PE=1 SV=1	44.9	Control_MR_2	Control_MR_2
A3KGV1	Outer dense fiber protein 2 OS=Mus musculus OX=10090 GN=Odf2 PE=1 SV=1	51.63	Control_MR_2	Control_MR_2
Q8BXQ6	Aminopeptidase O OS=Mus musculus OX=10090 GN=Aopep PE=2 SV=2	12.67	Control_MR_2	Control_MR_2
Q9JJV9	Sodium channel protein type 5 subunit alpha OS=Mus musculus OX=10090 GN=Scn5a PE=1 SV=2	16.16	Control_MR_2	Control_MR_2
Q9CPY1	39S ribosomal protein L51, mitochondrial OS=Mus musculus OX=10090 GN=Mrpl51 PE=1 SV=1	39.91	Control_MR_2	Control_MR_2
Q8CJ19	[F-actin]-monooxygenase MICAL3 OS=Mus musculus OX=10090 GN=Mical3 PE=1 SV=2	31.94	Control_MR_2	Control_MR_2
Q60636	PR domain zinc finger protein 1 OS=Mus musculus OX=10090 GN=Prdm1 PE=1 SV=1	22.58	Control_MR_2	Control_MR_2
Q60997	Deleted in malignant brain tumors 1 protein OS=Mus musculus OX=10090 GN=Dmbt1 PE=1 SV=2	13.07	Control_MR_2	Control_MR_2
Q60992	Guanine nucleotide exchange factor VAV2 OS=Mus musculus OX=10090 GN=Vav2 PE=1 SV=1	37.21	Control_MR_2	Control_MR_2
Q91YD9	Neural Wiskott-Aldrich syndrome protein OS=Mus musculus OX=10090 GN=Wasl PE=1 SV=1	15.71	Control_MR_2	Control_MR_2
Q3UZ09	Complement C1r subcomponent-like protein OS=Mus musculus OX=10090 GN=C1rl PE=1 SV=1	4.84	Control_MR_2	Control_MR_2
Q8C6J9	NACHT, LRR and PYD domains-containing protein 4B OS=Mus musculus OX=10090 GN=Nlrp4b PE=2 SV=1	69.83	Control_MR_2	Control_MR_2
Q0VGY8	Protein TANC1 OS=Mus musculus OX=10090 GN=Tanc1 PE=1 SV=2	6.11	Control_MR_2	Control_MR_2
Q61712	DnaJ homolog subfamily C member 1 OS=Mus musculus OX=10090 GN=Dnajc1 PE=1 SV=1	46.15	Control_MR_2	Control_MR_2
P53668	LIM domain kinase 1 OS=Mus musculus OX=10090 GN=Limk1 PE=1 SV=1	17.74	Control_MR_2	Control_MR_2
Q64096	Guanine nucleotide exchange factor DBS OS=Mus musculus OX=10090 GN=Mcf2l PE=1 SV=2	37.08	Control_MR_2	Control_MR_2
Q64092	Transcription factor E3 OS=Mus musculus OX=10090 GN=Tfe3 PE=1 SV=2	3.6	Control_MR_2	Control_MR_2
O70373	Xin actin-binding repeat-containing protein 1 OS=Mus musculus OX=10090 GN=Xirp1 PE=1 SV=2	25.57	Control_MR_2	Control_MR_2
Q8BHP2	NUT family member 1 OS=Mus musculus OX=10090 GN=Nutm1 PE=1 SV=1	10.16	Control_MR_2	Control_MR_2
Q9CPW3	39S ribosomal protein L54, mitochondrial OS=Mus musculus OX=10090 GN=Mrpl54 PE=1 SV=1	9.85	Control_MR_2	Control_MR_2
Q3U3C9	Genetic suppressor element 1 OS=Mus musculus OX=10090 GN=Gse1 PE=1 SV=2	29.6	Control_MR_2	Control_MR_2
Q8CCB4	Vacuolar protein sorting-associated protein 53 homolog OS=Mus musculus OX=10090 GN=Vps53 PE=1 SV=1	8.49	Control_MR_2	Control_MR_2
Q8CIN6	CUGBP Elav-like family member 3 OS=Mus musculus OX=10090 GN=Celf3 PE=2 SV=1	14.03	Control_MR_2	Control_MR_2
Q01815	Voltage-dependent L-type calcium channel subunit alpha-1C OS=Mus musculus OX=10090 GN=Cacna1c PE=1 SV=1	30.89	Control_MR_2	Control_MR_2
B1AQJ2	Ubiquitin carboxyl-terminal hydrolase 36 OS=Mus musculus OX=10090 GN=Usp36 PE=1 SV=1	13.58	Control_MR_2	Control_MR_2
A2ASQ1	Agrin OS=Mus musculus OX=10090 GN=Agrn PE=1 SV=1	7.18	Control_MR_2	Control_MR_2
Q0VDQ9	Fez family zinc finger protein 1 OS=Mus musculus OX=10090 GN=Fezf1 PE=2 SV=1	25	Control_MR_2	Control_MR_2
Q8BUH8	Sentrin-specific protease 7 OS=Mus musculus OX=10090 GN=Senp7 PE=1 SV=1	0.85	Control_MR_2	Control_MR_2
A2A791	Zinc finger MYM-type protein 4 OS=Mus musculus OX=10090 GN=Zmym4 PE=1 SV=1	10.23	Control_MR_2	Control_MR_2
Q8CFG9	Complement C1r-B subcomponent OS=Mus musculus OX=10090 GN=C1rb PE=2 SV=1	21.46	Control_MR_2	Control_MR_2
Q9ERS6	X-linked interleukin-1 receptor accessory protein-like 2 OS=Mus musculus OX=10090 GN=Il1rapl2 PE=2 SV=1	7.62	Control_MR_2	Control_MR_2
Q499D0	Forkhead box protein N3 OS=Mus musculus OX=10090 GN=Foxn3 PE=1 SV=1	1.03	Control_MR_2	Control_MR_2
Q8CFG4	Doublesex- and mab-3-related transcription factor A1 OS=Mus musculus OX=10090 GN=Dmrta1 PE=2 SV=1	39.45	Control_MR_2	Control_MR_2
Q60603	Potassium voltage-gated channel subfamily H member 1 OS=Mus musculus OX=10090 GN=Kcnh1 PE=1 SV=2	49.31	Control_MR_2	Control_MR_2
Q99N16	Leukotriene-B(4) omega-hydroxylase 2 OS=Mus musculus OX=10090 GN=Cyp4f3 PE=1 SV=2	21.97	Control_MR_2	Control_MR_2
Q8BKT7	THO complex subunit 5 homolog OS=Mus musculus OX=10090 GN=Thoc5 PE=1 SV=2	18.7	Control_MR_2	Control_MR_2
Q8K1C9	Leucine-rich repeat-containing protein 41 OS=Mus musculus OX=10090 GN=Lrrc41 PE=1 SV=3	2.84	Control_MR_2	Control_MR_2
P27790	Major centromere autoantigen B OS=Mus musculus OX=10090 GN=Cenpb PE=2 SV=2	23.81	Control_MR_2	Control_MR_2
Q9CZH8	Coiled-coil domain-containing protein 77 OS=Mus musculus OX=10090 GN=Ccdc77 PE=1 SV=1	165.29	Control_MR_2	Control_MR_2
Q3TKT4	Transcription activator BRG1 OS=Mus musculus OX=10090 GN=Smarca4 PE=1 SV=1	20.65	Control_MR_2	Control_MR_2
Q14AT2	Testis-expressed protein 11 OS=Mus musculus OX=10090 GN=Tex11 PE=1 SV=1	0.09	Control_MR_2	Control_MR_2
Q9JJR6	Uncharacterized protein C11orf16 homolog OS=Mus musculus OX=10090 GN=D7h11orf16 PE=2 SV=2	19.76	Control_MR_2	Control_MR_2
A2ACP1	Tetratricopeptide repeat protein 39A OS=Mus musculus OX=10090 GN=Ttc39a PE=2 SV=1	14.65	Control_MR_2	Control_MR_2
G5E8K5	Ankyrin-3 OS=Mus musculus OX=10090 GN=Ank3 PE=1 SV=1	37.3	Control_MR_2	Control_MR_2
Q9JK30	Origin recognition complex subunit 3 OS=Mus musculus OX=10090 GN=Orc3 PE=1 SV=1	24.34	Control_MR_2	Control_MR_2
P53995	Anaphase-promoting complex subunit 1 OS=Mus musculus OX=10090 GN=Anapc1 PE=1 SV=2	36.55	Control_MR_2	Control_MR_2
Q5EBH1	Ras association domain-containing protein 5 OS=Mus musculus OX=10090 GN=Rassf5 PE=1 SV=1	12.73	Control_MR_2	Control_MR_2
D3YWJ0	Nuclear GTPase SLIP-GC OS=Mus musculus OX=10090 GN=Nuggc PE=3 SV=1	23.04	Control_MR_2	Control_MR_2
Q68SN8	Fc receptor-like protein 5 OS=Mus musculus OX=10090 GN=Fcrl5 PE=1 SV=3	37.87	Control_MR_2	Control_MR_2
Q5DTN8	Janus kinase and microtubule-interacting protein 3 OS=Mus musculus OX=10090 GN=Jakmip3 PE=1 SV=2	31.27	Control_MR_2	Control_MR_2
Q14B46	Rhotekin-2 OS=Mus musculus OX=10090 GN=Rtkn2 PE=1 SV=2	98.83	Control_MR_2	Control_MR_2
Q3UYK3	TBC1 domain family member 9 OS=Mus musculus OX=10090 GN=Tbc1d9 PE=2 SV=2	20.6	Control_MR_2	Control_MR_2
Q3TUF7	YEATS domain-containing protein 2 OS=Mus musculus OX=10090 GN=Yeats2 PE=1 SV=2	5.25	Control_MR_2	Control_MR_2
Q8CFE4	SCY1-like protein 2 OS=Mus musculus OX=10090 GN=Scyl2 PE=1 SV=1	8.1	Control_MR_2	Control_MR_2
Q8CFE3	REST corepressor 1 OS=Mus musculus OX=10090 GN=Rcor1 PE=1 SV=3	19.07	Control_MR_2	Control_MR_2
Q8VHK1	Caskin-2 OS=Mus musculus OX=10090 GN=Caskin2 PE=1 SV=3	19.78	Control_MR_2	Control_MR_2
Q69ZX8	Actin-binding LIM protein 3 OS=Mus musculus OX=10090 GN=Ablim3 PE=1 SV=2	7.96	Control_MR_2	Control_MR_2
Q8BHL8	Proteasome inhibitor PI31 subunit OS=Mus musculus OX=10090 GN=Psmf1 PE=1 SV=1	10.27	Control_MR_2	Control_MR_2
Q69ZX6	MORC family CW-type zinc finger protein 2A OS=Mus musculus OX=10090 GN=Morc2a PE=1 SV=2	75.15	Control_MR_2	Control_MR_2
Q6PGG2	GEM-interacting protein OS=Mus musculus OX=10090 GN=Gmip PE=1 SV=1	26.25	Control_MR_2	Control_MR_2
Q811W1	Alanine and arginine-rich domain-containing protein OS=Mus musculus OX=10090 GN=Aard PE=2 SV=1	11.35	Control_MR_2	Control_MR_2
Q8K1A6	Coiled-coil and C2 domain-containing protein 1A OS=Mus musculus OX=10090 GN=Cc2d1a PE=1 SV=2	22.58	Control_MR_2	Control_MR_2
Q5DTM8	E3 ubiquitin-protein ligase BRE1A OS=Mus musculus OX=10090 GN=Rnf20 PE=1 SV=2	34.58	Control_MR_2	Control_MR_2
Q8C092	Transcription initiation factor TFIID subunit 5 OS=Mus musculus OX=10090 GN=Taf5 PE=1 SV=1	17.87	Control_MR_2	Control_MR_2
Q8BXK8	Arf-GAP with GTPase, ANK repeat and PH domain-containing protein 1 OS=Mus musculus OX=10090 GN=Agap1 PE=1 SV=1	13.69	Control_MR_2	Control_MR_2
Q8K4G5	Actin-binding LIM protein 1 OS=Mus musculus OX=10090 GN=Ablim1 PE=1 SV=1	36.13	Control_MR_2	Control_MR_2
Q3TKR3	NACHT, LRR and PYD domains-containing protein 4C OS=Mus musculus OX=10090 GN=Nlrp4c PE=2 SV=1	20.53	Control_MR_2	Control_MR_2
O88576	Sodium-dependent neutral amino acid transporter B(0)AT3 OS=Mus musculus OX=10090 GN=Slc6a18 PE=1 SV=1	22.77	Control_MR_2	Control_MR_2
G5E8I7	Ubiquitin carboxyl-terminal hydrolase 17-like protein C OS=Mus musculus OX=10090 GN=Usp17lc PE=1 SV=1	16.36	Control_MR_2	Control_MR_2
O88573	AF4/FMR2 family member 1 OS=Mus musculus OX=10090 GN=Aff1 PE=1 SV=2	22.61	Control_MR_2	Control_MR_2
Q8VED2	Biogenesis of lysosome-related organelles complex 1 subunit 4 OS=Mus musculus OX=10090 GN=Bloc1s4 PE=1 SV=1	89.89	Control_MR_2	Control_MR_2
Q8R516	E3 ubiquitin-protein ligase MIB2 OS=Mus musculus OX=10090 GN=Mib2 PE=1 SV=2	10.32	Control_MR_2	Control_MR_2
P08003	Protein disulfide-isomerase A4 OS=Mus musculus OX=10090 GN=Pdia4 PE=1 SV=3	9.79	Control_MR_2	Control_MR_2
Q9Z0H8	CAP-Gly domain-containing linker protein 2 OS=Mus musculus OX=10090 GN=Clip2 PE=1 SV=2	36.06	Control_MR_2	Control_MR_2
P49194	Retinol-binding protein 3 OS=Mus musculus OX=10090 GN=Rbp3 PE=2 SV=3	36.12	Control_MR_2	Control_MR_2
Q60I26	ALS2 C-terminal-like protein OS=Mus musculus OX=10090 GN=Als2cl PE=1 SV=1	10.89	Control_MR_2	Control_MR_2
Q91V83	TELO2-interacting protein 1 homolog OS=Mus musculus OX=10090 GN=Tti1 PE=1 SV=2	6.01	Control_MR_2	Control_MR_2
P57080	Ubiquitin carboxyl-terminal hydrolase 25 OS=Mus musculus OX=10090 GN=Usp25 PE=1 SV=2	43.78	Control_MR_2	Control_MR_2
Q4KMM3	Oxidation resistance protein 1 OS=Mus musculus OX=10090 GN=Oxr1 PE=1 SV=3	20.14	Control_MR_2	Control_MR_2
Q6ZQ88	Lysine-specific histone demethylase 1A OS=Mus musculus OX=10090 GN=Kdm1a PE=1 SV=2	41.18	Control_MR_2	Control_MR_2
O88207	Collagen alpha-1(V) chain OS=Mus musculus OX=10090 GN=Col5a1 PE=1 SV=2	17.82	Control_MR_2	Control_MR_2
O35134	DNA-directed RNA polymerase I subunit RPA1 OS=Mus musculus OX=10090 GN=Polr1a PE=1 SV=2	4.67	Control_MR_2	Control_MR_2
A2AFS3	UPF0577 protein KIAA1324 OS=Mus musculus OX=10090 GN=Kiaa1324 PE=1 SV=1	17.37	Control_MR_2	Control_MR_2
P28843	Dipeptidyl peptidase 4 OS=Mus musculus OX=10090 GN=Dpp4 PE=1 SV=3	6.98	Control_MR_2	Control_MR_2
Q6GQW0	Ankyrin repeat and BTB/POZ domain-containing protein BTBD11 OS=Mus musculus OX=10090 GN=Btbd11 PE=2 SV=2	16.19	Control_MR_2	Control_MR_2
Q5SS80	Dehydrogenase/reductase SDR family member 13 OS=Mus musculus OX=10090 GN=Dhrs13 PE=1 SV=1	70.06	Control_MR_2	Control_MR_2
A2AVR2	Maestro heat-like repeat-containing protein family member 7 OS=Mus musculus OX=10090 GN=Mroh7 PE=3 SV=1	57.9	Control_MR_2	Control_MR_2
O70318	Band 4.1-like protein 2 OS=Mus musculus OX=10090 GN=Epb41l2 PE=1 SV=2	12.31	Control_MR_2	Control_MR_2
Q8C079	Striatin-interacting protein 1 OS=Mus musculus OX=10090 GN=Strip1 PE=1 SV=2	31.84	Control_MR_2	Control_MR_2
O35129	Prohibitin-2 OS=Mus musculus OX=10090 GN=Phb2 PE=1 SV=1	17.58	Control_MR_2	Control_MR_2
Q5DTK1	Chondroitin sulfate synthase 3 OS=Mus musculus OX=10090 GN=Chsy3 PE=2 SV=3	27.14	Control_MR_2	Control_MR_2
O35126	Atrophin-1 OS=Mus musculus OX=10090 GN=Atn1 PE=1 SV=1	2	Control_MR_2	Control_MR_2
Q6IFZ6	Keratin, type II cytoskeletal 1b OS=Mus musculus OX=10090 GN=Krt77 PE=1 SV=1	4.13	Control_MR_2	Control_MR_2
Q8VHH5	Arf-GAP with GTPase, ANK repeat and PH domain-containing protein 3 OS=Mus musculus OX=10090 GN=Agap3 PE=1 SV=1	4.25	Control_MR_2	Control_MR_2
Q5XJV7	SET domain-containing protein 5 OS=Mus musculus OX=10090 GN=Setd5 PE=1 SV=2	11.03	Control_MR_2	Control_MR_2
Q8VEB2	Protein salvador homolog 1 OS=Mus musculus OX=10090 GN=Sav1 PE=1 SV=2	86.39	Control_MR_2	Control_MR_2
Q5XJV6	Serine/threonine-protein kinase LMTK3 OS=Mus musculus OX=10090 GN=Lmtk3 PE=1 SV=1	28.1	Control_MR_2	Control_MR_2
G5E8G2	Ubiquitin carboxyl-terminal hydrolase 17-like protein D OS=Mus musculus OX=10090 GN=Usp17ld PE=1 SV=1	16.36	Control_MR_2	Control_MR_2
E9Q784	Zinc finger CCCH domain-containing protein 13 OS=Mus musculus OX=10090 GN=Zc3h13 PE=1 SV=1	40.49	Control_MR_2	Control_MR_2
Q3UFB7	High affinity nerve growth factor receptor OS=Mus musculus OX=10090 GN=Ntrk1 PE=1 SV=2	14.86	Control_MR_2	Control_MR_2
Q3UFB2	Box C/D snoRNA protein 1 OS=Mus musculus OX=10090 GN=Znhit6 PE=1 SV=2	9.75	Control_MR_2	Control_MR_2
Q76I79	Protein phosphatase Slingshot homolog 1 OS=Mus musculus OX=10090 GN=Ssh1 PE=1 SV=1	10.62	Control_MR_2	Control_MR_2
Q9Z0F0	Beta-1,3-galactosyltransferase 4 OS=Mus musculus OX=10090 GN=B3galt4 PE=1 SV=1	16.28	Control_MR_2	Control_MR_2
P60755	MAM domain-containing glycosylphosphatidylinositol anchor protein 2 OS=Mus musculus OX=10090 GN=Mdga2 PE=1 SV=1	40.74	Control_MR_2	Control_MR_2
Q07409	Contactin-3 OS=Mus musculus OX=10090 GN=Cntn3 PE=1 SV=2	24.25	Control_MR_2	Control_MR_2
Q6GQU6	Leucine-rich repeat and immunoglobulin-like domain-containing nogo receptor-interacting protein 3 OS=Mus musculus OX=10090 GN=Lingo3 PE=2 SV=2	2.73	Control_MR_2	Control_MR_2
Q60902	Epidermal growth factor receptor substrate 15-like 1 OS=Mus musculus OX=10090 GN=Eps15l1 PE=1 SV=3	8.02	Control_MR_2	Control_MR_2
Q99MJ9	ATP-dependent RNA helicase DDX50 OS=Mus musculus OX=10090 GN=Ddx50 PE=2 SV=1	17.91	Control_MR_2	Control_MR_2
Q69ZT9	TBC1 domain family member 30 OS=Mus musculus OX=10090 GN=Tbc1d30 PE=1 SV=2	13.51	Control_MR_2	Control_MR_2
Q99PP7	E3 ubiquitin-protein ligase TRIM33 OS=Mus musculus OX=10090 GN=Trim33 PE=1 SV=2	35.11	Control_MR_2	Control_MR_2
Q80SY5	Pre-mRNA-splicing factor 38B OS=Mus musculus OX=10090 GN=Prpf38b PE=1 SV=1	45.67	Control_MR_2	Control_MR_2
Q99PP2	Zinc finger protein 318 OS=Mus musculus OX=10090 GN=Znf318 PE=1 SV=3	15.59	Control_MR_2	Control_MR_2
Q6PGC1	ATP-dependent RNA helicase DHX29 OS=Mus musculus OX=10090 GN=Dhx29 PE=1 SV=1	10.02	Control_MR_2	Control_MR_2
Q69ZT1	Fanconi-associated nuclease 1 OS=Mus musculus OX=10090 GN=Fan1 PE=2 SV=2	19.84	Control_MR_2	Control_MR_2
Q6NXK2	Zinc finger protein 532 OS=Mus musculus OX=10090 GN=Znf532 PE=1 SV=1	72.86	Control_MR_2	Control_MR_2
Q8C052	Microtubule-associated protein 1S OS=Mus musculus OX=10090 GN=Map1s PE=1 SV=2	16.33	Control_MR_2	Control_MR_2
Q6ZQ58	La-related protein 1 OS=Mus musculus OX=10090 GN=Larp1 PE=1 SV=3	53.2	Control_MR_2	Control_MR_2
Q9CZB6	Mediator of RNA polymerase II transcription subunit 7 OS=Mus musculus OX=10090 GN=Med7 PE=1 SV=2	51.67	Control_MR_2	Control_MR_2
Q9ERL9	Guanylate cyclase soluble subunit alpha-1 OS=Mus musculus OX=10090 GN=Gucy1a1 PE=1 SV=2	9.31	Control_MR_2	Control_MR_2
O88537	Formyl peptide receptor-related sequence 3 OS=Mus musculus OX=10090 GN=Fpr-rs3 PE=2 SV=2	56.13	Control_MR_2	Control_MR_2
J3QNX5	Protein shisa-8 OS=Mus musculus OX=10090 GN=Shisa8 PE=1 SV=1	56.95	Control_MR_2	Control_MR_2
A2AIV2	Protein virilizer homolog OS=Mus musculus OX=10090 GN=Virma PE=1 SV=1	15.76	Control_MR_2	Control_MR_2
Q9DAN1	Protein disulfide-isomerase-like protein of the testis OS=Mus musculus OX=10090 GN=Pdilt PE=1 SV=2	43.5	Control_MR_2	Control_MR_2
Q8R1F1	Niban-like protein 1 OS=Mus musculus OX=10090 GN=Fam129b PE=1 SV=2	21.05	Control_MR_2	Control_MR_2
P08680	5-aminolevulinate synthase, erythroid-specific, mitochondrial OS=Mus musculus OX=10090 GN=Alas2 PE=1 SV=3	24.17	Control_MR_2	Control_MR_2
Q5JCT0	Beta-1,3-galactosyl-O-glycosyl-glycoprotein beta-1,6-N-acetylglucosaminyltransferase 3 OS=Mus musculus OX=10090 GN=Gcnt3 PE=2 SV=2	44.05	Control_MR_2	Control_MR_2
Q62190	Macrophage-stimulating protein receptor OS=Mus musculus OX=10090 GN=Mst1r PE=1 SV=3	16.13	Control_MR_2	Control_MR_2
B2RXS4	Plexin-B2 OS=Mus musculus OX=10090 GN=Plxnb2 PE=1 SV=1	11.09	Control_MR_2	Control_MR_2
Q99MI1	ELKS/Rab6-interacting/CAST family member 1 OS=Mus musculus OX=10090 GN=Erc1 PE=1 SV=1	34.42	Control_MR_2	Control_MR_2
Q56A08	G-patch domain and KOW motifs-containing protein OS=Mus musculus OX=10090 GN=Gpkow PE=1 SV=2	24.55	Control_MR_2	Control_MR_2
Q9CPN8	Insulin-like growth factor 2 mRNA-binding protein 3 OS=Mus musculus OX=10090 GN=Igf2bp3 PE=1 SV=1	12.85	Control_MR_2	Control_MR_2
P52840	Sulfotransferase 1A1 OS=Mus musculus OX=10090 GN=Sult1a1 PE=1 SV=1	8.31	Control_MR_2	Control_MR_2
Q6NXJ0	Protein WWC2 OS=Mus musculus OX=10090 GN=Wwc2 PE=1 SV=1	6.69	Control_MR_2	Control_MR_2
Q9D7Z6	Calcium-activated chloride channel regulator 1 OS=Mus musculus OX=10090 GN=Clca1 PE=1 SV=2	15.35	Control_MR_2	Control_MR_2
Q5DTH5	Teashirt homolog 1 OS=Mus musculus OX=10090 GN=Tshz1 PE=1 SV=2	10.67	Control_MR_2	Control_MR_2
P62908	40S ribosomal protein S3 OS=Mus musculus OX=10090 GN=Rps3 PE=1 SV=1	98.86	Control_MR_2	Control_MR_2
Q8CIE6	Coatomer subunit alpha OS=Mus musculus OX=10090 GN=Copa PE=1 SV=2	20.04	Control_MR_2	Control_MR_2
Q69ZR9	Protein TASOR OS=Mus musculus OX=10090 GN=Fam208a PE=1 SV=2	14.44	Control_MR_2	Control_MR_2
P35969	Vascular endothelial growth factor receptor 1 OS=Mus musculus OX=10090 GN=Flt1 PE=1 SV=1	32.76	Control_MR_2	Control_MR_2
Q61097	Kinase suppressor of Ras 1 OS=Mus musculus OX=10090 GN=Ksr1 PE=1 SV=1	16.09	Control_MR_2	Control_MR_2
Q03391	Glutamate receptor ionotropic, NMDA 2D OS=Mus musculus OX=10090 GN=Grin2d PE=1 SV=3	24.39	Control_MR_2	Control_MR_2
Q9D1M7	Peptidyl-prolyl cis-trans isomerase FKBP11 OS=Mus musculus OX=10090 GN=Fkbp11 PE=1 SV=1	66.57	Control_MR_2	Control_MR_2
Q61093	Cytochrome b-245 heavy chain OS=Mus musculus OX=10090 GN=Cybb PE=1 SV=1	10.78	Control_MR_2	Control_MR_2
Q61092	Laminin subunit gamma-2 OS=Mus musculus OX=10090 GN=Lamc2 PE=1 SV=2	75.74	Control_MR_2	Control_MR_2
Q6ZQ38	Cullin-associated NEDD8-dissociated protein 1 OS=Mus musculus OX=10090 GN=Cand1 PE=1 SV=2	5.6	Control_MR_2	Control_MR_2
Q9D541	Coiled-coil domain-containing protein 7 OS=Mus musculus OX=10090 GN=Ccdc7 PE=2 SV=1	4.75	Control_MR_2	Control_MR_2
Q811P8	Rho GTPase-activating protein 32 OS=Mus musculus OX=10090 GN=Arhgap32 PE=1 SV=2	11.3	Control_MR_2	Control_MR_2
Q62172	RalA-binding protein 1 OS=Mus musculus OX=10090 GN=Ralbp1 PE=1 SV=4	24.67	Control_MR_2	Control_MR_2
Q6NXH8	Methyltransferase-like protein 25 OS=Mus musculus OX=10090 GN=Mettl25 PE=2 SV=1	29.46	Control_MR_2	Control_MR_2
Q61087	Laminin subunit beta-3 OS=Mus musculus OX=10090 GN=Lamb3 PE=1 SV=2	25.72	Control_MR_2	Control_MR_2
Q91V24	ATP-binding cassette sub-family A member 7 OS=Mus musculus OX=10090 GN=Abca7 PE=1 SV=1	22.88	Control_MR_2	Control_MR_2
Q6NXH3	Vasculin OS=Mus musculus OX=10090 GN=Gpbp1 PE=1 SV=1	2.88	Control_MR_2	Control_MR_2
Q9D7X8	Gamma-glutamylcyclotransferase OS=Mus musculus OX=10090 GN=Ggct PE=1 SV=1	99.22	Control_MR_2	Control_MR_2
Q9D898	Actin-related protein 2/3 complex subunit 5-like protein OS=Mus musculus OX=10090 GN=Arpc5l PE=1 SV=1	76.82	Control_MR_2	Control_MR_2
O88509	DNA (cytosine-5)-methyltransferase 3B OS=Mus musculus OX=10090 GN=Dnmt3b PE=1 SV=2	61.22	Control_MR_2	Control_MR_2
O88508	DNA (cytosine-5)-methyltransferase 3A OS=Mus musculus OX=10090 GN=Dnmt3a PE=1 SV=2	35.83	Control_MR_2	Control_MR_2
Q6P3Y5	Zinc finger protein 280C OS=Mus musculus OX=10090 GN=Znf280c PE=1 SV=1	41.28	Control_MR_2	Control_MR_2
B7ZNG4	Tastin OS=Mus musculus OX=10090 GN=Troap PE=2 SV=1	20.41	Control_MR_2	Control_MR_2
E9Q3L2	Phosphatidylinositol 4-kinase alpha OS=Mus musculus OX=10090 GN=Pi4ka PE=1 SV=2	3.45	Control_MR_2	Control_MR_2
P63094	Guanine nucleotide-binding protein G(s) subunit alpha isoforms short OS=Mus musculus OX=10090 GN=Gnas PE=1 SV=1	134.71	Control_MR_2	Control_MR_2
Q99PL5	Ribosome-binding protein 1 OS=Mus musculus OX=10090 GN=Rrbp1 PE=1 SV=2	55.67	Control_MR_2	Control_MR_2
Q69ZP3	Probable hydrolase PNKD OS=Mus musculus OX=10090 GN=Pnkd PE=1 SV=2	18.47	Control_MR_2	Control_MR_2
Q923J1	Transient receptor potential cation channel subfamily M member 7 OS=Mus musculus OX=10090 GN=Trpm7 PE=1 SV=1	27.81	Control_MR_2	Control_MR_2
Q9QWK5	Baculoviral IAP repeat-containing protein 1a OS=Mus musculus OX=10090 GN=Naip1 PE=2 SV=3	29.29	Control_MR_2	Control_MR_2
Q64331	Unconventional myosin-VI OS=Mus musculus OX=10090 GN=Myo6 PE=1 SV=1	27.13	Control_MR_2	Control_MR_2
Q3TB82	Pleckstrin homology domain-containing family F member 1 OS=Mus musculus OX=10090 GN=Plekhf1 PE=2 SV=1	0.53	Control_MR_2	Control_MR_2
Q6ZQ18	Protein EFR3 homolog B OS=Mus musculus OX=10090 GN=Efr3b PE=1 SV=2	4.94	Control_MR_2	Control_MR_2
Q9QZQ1	Afadin OS=Mus musculus OX=10090 GN=Afdn PE=1 SV=3	15.34	Control_MR_2	Control_MR_2
P39054	Dynamin-2 OS=Mus musculus OX=10090 GN=Dnm2 PE=1 SV=2	27.81	Control_MR_2	Control_MR_2
Q78JN3	Enoyl-CoA delta isomerase 3, peroxisomal OS=Mus musculus OX=10090 GN=Eci3 PE=1 SV=1	125.69	Control_MR_2	Control_MR_2
Q6ZQ12	Ninein-like protein OS=Mus musculus OX=10090 GN=Ninl PE=1 SV=3	8.91	Control_MR_2	Control_MR_2
P39053	Dynamin-1 OS=Mus musculus OX=10090 GN=Dnm1 PE=1 SV=2	15.09	Control_MR_2	Control_MR_2
O88856	Protein-tyrosine sulfotransferase 2 OS=Mus musculus OX=10090 GN=Tpst2 PE=1 SV=1	28.08	Control_MR_2	Control_MR_2
Q9ERH4	Nucleolar and spindle-associated protein 1 OS=Mus musculus OX=10090 GN=Nusap1 PE=1 SV=1	26.13	Control_MR_2	Control_MR_2
Q8CIB9	N-acetyltransferase ESCO2 OS=Mus musculus OX=10090 GN=Esco2 PE=2 SV=3	39.42	Control_MR_2	Control_MR_2
P58459	A disintegrin and metalloproteinase with thrombospondin motifs 10 OS=Mus musculus OX=10090 GN=Adamts10 PE=2 SV=3	26.83	Control_MR_2	Control_MR_2
P50636	E3 ubiquitin-protein ligase RNF19A OS=Mus musculus OX=10090 GN=Rnf19a PE=1 SV=2	11.42	Control_MR_2	Control_MR_2
Q8R4H2	Rho guanine nucleotide exchange factor 12 OS=Mus musculus OX=10090 GN=Arhgef12 PE=1 SV=2	10.87	Control_MR_2	Control_MR_2
Q99ME9	Nucleolar GTP-binding protein 1 OS=Mus musculus OX=10090 GN=Gtpbp4 PE=1 SV=3	69.88	Control_MR_2	Control_MR_2
Q64685	Beta-galactoside alpha-2,6-sialyltransferase 1 OS=Mus musculus OX=10090 GN=St6gal1 PE=1 SV=2	25.17	Control_MR_2	Control_MR_2
Q91V04	Translocating chain-associated membrane protein 1 OS=Mus musculus OX=10090 GN=Tram1 PE=1 SV=3	0.75	Control_MR_2	Control_MR_2
Q8C9B9	Death-inducer obliterator 1 OS=Mus musculus OX=10090 GN=Dido1 PE=1 SV=4	23.33	Control_MR_2	Control_MR_2
Q9CW79	Golgin subfamily A member 1 OS=Mus musculus OX=10090 GN=Golga1 PE=1 SV=2	23.43	Control_MR_2	Control_MR_2
P98195	Probable phospholipid-transporting ATPase IIB OS=Mus musculus OX=10090 GN=Atp9b PE=1 SV=4	11.46	Control_MR_2	Control_MR_2
Q78PY7	Staphylococcal nuclease domain-containing protein 1 OS=Mus musculus OX=10090 GN=Snd1 PE=1 SV=1	42.03	Control_MR_2	Control_MR_2
Q8R1A4	Dedicator of cytokinesis protein 7 OS=Mus musculus OX=10090 GN=Dock7 PE=1 SV=3	7.65	Control_MR_2	Control_MR_2
Q9JJG0	Transforming acidic coiled-coil-containing protein 2 OS=Mus musculus OX=10090 GN=Tacc2 PE=1 SV=2	10.34	Control_MR_2	Control_MR_2
Q9ERG0	LIM domain and actin-binding protein 1 OS=Mus musculus OX=10090 GN=Lima1 PE=1 SV=3	43.59	Control_MR_2	Control_MR_2
Q80VY9	ATP-dependent RNA helicase DHX33 OS=Mus musculus OX=10090 GN=Dhx33 PE=1 SV=1	2.59	Control_MR_2	Control_MR_2
Q64318	Zinc finger E-box-binding homeobox 1 OS=Mus musculus OX=10090 GN=Zeb1 PE=1 SV=1	20.26	Control_MR_2	Control_MR_2
P16882	Growth hormone receptor OS=Mus musculus OX=10090 GN=Ghr PE=1 SV=1	10.7	Control_MR_2	Control_MR_2
Q91XT6	Tandem C2 domains nuclear protein OS=Mus musculus OX=10090 GN=Tc2n PE=1 SV=2	41.56	Control_MR_2	Control_MR_2
Q3UUY6	Prominin-2 OS=Mus musculus OX=10090 GN=Prom2 PE=1 SV=1	6.78	Control_MR_2	Control_MR_2
Q8BXA7	PH domain leucine-rich repeat-containing protein phosphatase 2 OS=Mus musculus OX=10090 GN=Phlpp2 PE=1 SV=3	6.05	Control_MR_2	Control_MR_2
A2AJ15	Endoplasmic reticulum mannosyl-oligosaccharide 1,2-alpha-mannosidase OS=Mus musculus OX=10090 GN=Man1b1 PE=1 SV=1	39.32	Control_MR_2	Control_MR_2
E9Q0C6	Acrosomal protein KIAA1210 OS=Mus musculus OX=10090 GN=Kiaa1210 PE=1 SV=1	31.79	Control_MR_2	Control_MR_2
O88833	Cytochrome P450 4A10 OS=Mus musculus OX=10090 GN=Cyp4a10 PE=2 SV=2	21.69	Control_MR_2	Control_MR_2
Q6PA06	Atlastin-2 OS=Mus musculus OX=10090 GN=Atl2 PE=1 SV=1	6.99	Control_MR_2	Control_MR_2
Q62130	Tyrosine-protein phosphatase non-receptor type 14 OS=Mus musculus OX=10090 GN=Ptpn14 PE=1 SV=2	28.24	Control_MR_2	Control_MR_2
Q61043	Ninein OS=Mus musculus OX=10090 GN=Nin PE=1 SV=4	39.96	Control_MR_2	Control_MR_2
Q91XS1	Myotubularin-related protein 4 OS=Mus musculus OX=10090 GN=Mtmr4 PE=1 SV=1	12.17	Control_MR_2	Control_MR_2
Q3V3R1	Monofunctional C1-tetrahydrofolate synthase, mitochondrial OS=Mus musculus OX=10090 GN=Mthfd1l PE=1 SV=2	26.52	Control_MR_2	Control_MR_2
Q9QZN1	F-box/LRR-repeat protein 17 OS=Mus musculus OX=10090 GN=Fbxl17 PE=2 SV=3	33.24	Control_MR_2	Control_MR_2
Q3TTY5	Keratin, type II cytoskeletal 2 epidermal OS=Mus musculus OX=10090 GN=Krt2 PE=1 SV=1	25.62	Control_MR_2	Control_MR_2
Q5SUS0	F-box/WD repeat-containing protein 10 OS=Mus musculus OX=10090 GN=Fbxw10 PE=2 SV=1	26.95	Control_MR_2	Control_MR_2
Q66X19	NACHT, LRR and PYD domains-containing protein 4E OS=Mus musculus OX=10090 GN=Nlrp4e PE=2 SV=2	15.59	Control_MR_2	Control_MR_2
Q61037	Tuberin OS=Mus musculus OX=10090 GN=Tsc2 PE=1 SV=1	23.97	Control_MR_2	Control_MR_2
Q69ZL1	FYVE, RhoGEF and PH domain-containing protein 6 OS=Mus musculus OX=10090 GN=Fgd6 PE=1 SV=2	62.53	Control_MR_2	Control_MR_2
Q8K3Z9	Nuclear envelope pore membrane protein POM 121 OS=Mus musculus OX=10090 GN=Pom121 PE=1 SV=2	9.02	Control_MR_2	Control_MR_2
Q9D1G5	Leucine-rich repeat-containing protein 57 OS=Mus musculus OX=10090 GN=Lrrc57 PE=1 SV=1	60.11	Control_MR_2	Control_MR_2
P48356	Leptin receptor OS=Mus musculus OX=10090 GN=Lepr PE=1 SV=1	18.19	Control_MR_2	Control_MR_2
Q8CC27	Voltage-dependent L-type calcium channel subunit beta-2 OS=Mus musculus OX=10090 GN=Cacnb2 PE=1 SV=1	19.33	Control_MR_2	Control_MR_2
P06795	Multidrug resistance protein 1B OS=Mus musculus OX=10090 GN=Abcb1b PE=1 SV=1	3.91	Control_MR_2	Control_MR_2
Q05860	Formin-1 OS=Mus musculus OX=10090 GN=Fmn1 PE=1 SV=2	31.29	Control_MR_2	Control_MR_2
C0LLJ0	Importin subunit alpha-8 OS=Mus musculus OX=10090 GN=Kpna7 PE=1 SV=1	29.07	Control_MR_2	Control_MR_2
E9PY46	Intraflagellar transport protein 140 homolog OS=Mus musculus OX=10090 GN=Ift140 PE=1 SV=1	23.8	Control_MR_2	Control_MR_2
P58774	Tropomyosin beta chain OS=Mus musculus OX=10090 GN=Tpm2 PE=1 SV=1	161.98	Control_MR_2	Control_MR_2
P13595	Neural cell adhesion molecule 1 OS=Mus musculus OX=10090 GN=Ncam1 PE=1 SV=3	9.75	Control_MR_2	Control_MR_2
Q68FG3	Protein SPT2 homolog OS=Mus musculus OX=10090 GN=Spty2d1 PE=2 SV=1	28.99	Control_MR_2	Control_MR_2
Q811J3	Iron-responsive element-binding protein 2 OS=Mus musculus OX=10090 GN=Ireb2 PE=1 SV=2	44.97	Control_MR_2	Control_MR_2
Q569Z5	Probable ATP-dependent RNA helicase DDX46 OS=Mus musculus OX=10090 GN=Ddx46 PE=1 SV=2	34.44	Control_MR_2	Control_MR_2
Q3US17	Zinc finger protein 48 OS=Mus musculus OX=10090 GN=Znf48 PE=1 SV=2	7.35	Control_MR_2	Control_MR_2
Q6Q899	Probable ATP-dependent RNA helicase DDX58 OS=Mus musculus OX=10090 GN=Ddx58 PE=1 SV=2	24.49	Control_MR_2	Control_MR_2
Q8C2Q3	RNA-binding protein 14 OS=Mus musculus OX=10090 GN=Rbm14 PE=1 SV=1	27.24	Control_MR_2	Control_MR_2
Q8C5W4	MORC family CW-type zinc finger protein 2B OS=Mus musculus OX=10090 GN=Morc2b PE=2 SV=2	17.78	Control_MR_2	Control_MR_2
Q3UV71	Transmembrane and TPR repeat-containing protein 1 OS=Mus musculus OX=10090 GN=Tmtc1 PE=2 SV=2	33.67	Control_MR_2	Control_MR_2
Q3TQQ9	Uncharacterized protein C1orf112 homolog OS=Mus musculus OX=10090 PE=1 SV=2	5.51	Control_MR_2	Control_MR_2
Q9CYX7	RRP15-like protein OS=Mus musculus OX=10090 GN=Rrp15 PE=1 SV=2	48.85	Control_MR_2	Control_MR_2
Q9ERC8	Down syndrome cell adhesion molecule homolog OS=Mus musculus OX=10090 GN=Dscam PE=1 SV=1	12.18	Control_MR_2	Control_MR_2
Q8VE73	Cullin-7 OS=Mus musculus OX=10090 GN=Cul7 PE=1 SV=2	15.41	Control_MR_2	Control_MR_2
Q9CZ91	Serum response factor-binding protein 1 OS=Mus musculus OX=10090 GN=Srfbp1 PE=1 SV=1	17.22	Control_MR_2	Control_MR_2
P17932	Putative 60S ribosomal protein L32' OS=Mus musculus OX=10090 GN=Rpl32-ps PE=5 SV=2	15.9	Control_MR_2	Control_MR_2
E9Q9R9	Disks large homolog 5 OS=Mus musculus OX=10090 GN=Dlg5 PE=1 SV=1	36.97	Control_MR_2	Control_MR_2
Q4VAE3	Transmembrane protein 65 OS=Mus musculus OX=10090 GN=Tmem65 PE=1 SV=1	3.13	Control_MR_2	Control_MR_2
Q68FF6	ARF GTPase-activating protein GIT1 OS=Mus musculus OX=10090 GN=Git1 PE=1 SV=1	71.54	Control_MR_2	Control_MR_2
Q6PG95	Protein cramped-like OS=Mus musculus OX=10090 GN=Cramp1 PE=1 SV=3	7.65	Control_MR_2	Control_MR_2
Q7TNU7	LETM1 domain-containing protein LETM2, mitochondrial OS=Mus musculus OX=10090 GN=Letm2 PE=1 SV=1	45.13	Control_MR_2	Control_MR_2
Q9R1X5	Multidrug resistance-associated protein 5 OS=Mus musculus OX=10090 GN=Abcc5 PE=1 SV=2	45.67	Control_MR_2	Control_MR_2
Q68FF0	Uncharacterized protein KIAA1841 OS=Mus musculus OX=10090 GN=Kiaa1841 PE=1 SV=2	21.12	Control_MR_2	Control_MR_2
Q8BNJ6	Neuropilin and tolloid-like protein 2 OS=Mus musculus OX=10090 GN=Neto2 PE=1 SV=1	31.73	Control_MR_2	Control_MR_2
Q9D4K7	Coiled-coil domain-containing protein 105 OS=Mus musculus OX=10090 GN=Ccdc105 PE=1 SV=3	14.95	Control_MR_2	Control_MR_2
Q3U319	E3 ubiquitin-protein ligase BRE1B OS=Mus musculus OX=10090 GN=Rnf40 PE=1 SV=2	27.27	Control_MR_2	Control_MR_2
Q8BTV2	Cleavage and polyadenylation specificity factor subunit 7 OS=Mus musculus OX=10090 GN=Cpsf7 PE=1 SV=2	4.9	Control_MR_2	Control_MR_2
Q9D824	Pre-mRNA 3'-end-processing factor FIP1 OS=Mus musculus OX=10090 GN=Fip1l1 PE=1 SV=1	33.06	Control_MR_2	Control_MR_2
Q8VDU5	SNF-related serine/threonine-protein kinase OS=Mus musculus OX=10090 GN=Snrk PE=1 SV=1	33.67	Control_MR_2	Control_MR_2
P70191	TNF receptor-associated factor 5 OS=Mus musculus OX=10090 GN=Traf5 PE=1 SV=1	19.52	Control_MR_2	Control_MR_2
Q10470	Beta-1,4-mannosyl-glycoprotein 4-beta-N-acetylglucosaminyltransferase OS=Mus musculus OX=10090 GN=Mgat3 PE=1 SV=2	32.3	Control_MR_2	Control_MR_2
Q6PD29	Zinc finger protein 513 OS=Mus musculus OX=10090 GN=Znf513 PE=1 SV=2	14.22	Control_MR_2	Control_MR_2
Q68FE9	Teashirt homolog 2 OS=Mus musculus OX=10090 GN=Tshz2 PE=1 SV=1	10.34	Control_MR_2	Control_MR_2
Q66JT0	Wee1-like protein kinase 2 OS=Mus musculus OX=10090 GN=Wee2 PE=1 SV=2	20.31	Control_MR_2	Control_MR_2
Q3UXZ9	Lysine-specific demethylase 5A OS=Mus musculus OX=10090 GN=Kdm5a PE=1 SV=2	29.32	Control_MR_2	Control_MR_2
O08789	Max-binding protein MNT OS=Mus musculus OX=10090 GN=Mnt PE=2 SV=2	13.78	Control_MR_2	Control_MR_2
Q9JJA7	Cyclin-L2 OS=Mus musculus OX=10090 GN=Ccnl2 PE=1 SV=1	0.3	Control_MR_2	Control_MR_2
Q6ZPI0	Protein Jade-1 OS=Mus musculus OX=10090 GN=Jade1 PE=1 SV=2	8.29	Control_MR_2	Control_MR_2
D3Z4R1	Probable ATP-dependent DNA helicase HFM1 OS=Mus musculus OX=10090 GN=Hfm1 PE=3 SV=2	20.31	Control_MR_2	Control_MR_2
O35710	Nocturnin OS=Mus musculus OX=10090 GN=Noct PE=1 SV=3	29.1	Control_MR_2	Control_MR_2
Q69ZH9	Rho GTPase-activating protein 23 OS=Mus musculus OX=10090 GN=Arhgap23 PE=1 SV=2	22.5	Control_MR_2	Control_MR_2
B1AZI6	THO complex subunit 2 OS=Mus musculus OX=10090 GN=Thoc2 PE=1 SV=1	24.28	Control_MR_2	Control_MR_2
Q80W49	Beta/gamma crystallin domain-containing protein 3 OS=Mus musculus OX=10090 GN=Crybg3 PE=1 SV=2	7.97	Control_MR_2	Control_MR_2
P63013	Paired mesoderm homeobox protein 1 OS=Mus musculus OX=10090 GN=Prrx1 PE=1 SV=1	9.28	Control_MR_2	Control_MR_2
Q6Y685	Transforming acidic coiled-coil-containing protein 1 OS=Mus musculus OX=10090 GN=Tacc1 PE=1 SV=1	15.02	Control_MR_2	Control_MR_2
Q8BTT6	Digestive organ expansion factor homolog OS=Mus musculus OX=10090 GN=Diexf PE=2 SV=2	10.33	Control_MR_2	Control_MR_2
Q9D4I2	Meiosis inhibitor protein 1 OS=Mus musculus OX=10090 GN=Mei1 PE=2 SV=4	10.61	Control_MR_2	Control_MR_2
Q9CW03	Structural maintenance of chromosomes protein 3 OS=Mus musculus OX=10090 GN=Smc3 PE=1 SV=2	24.86	Control_MR_2	Control_MR_2
Q8VDS7	Centrosomal protein CEP57L1 OS=Mus musculus OX=10090 GN=Cep57l1 PE=2 SV=1	35.87	Control_MR_2	Control_MR_2
Q8BWZ3	N-alpha-acetyltransferase 25, NatB auxiliary subunit OS=Mus musculus OX=10090 GN=Naa25 PE=1 SV=1	15.71	Control_MR_2	Control_MR_2
B5TVM2	Immunoglobulin-like domain-containing receptor 2 OS=Mus musculus OX=10090 GN=Ildr2 PE=1 SV=2	13.36	Control_MR_2	Control_MR_2
P70174	Histamine H1 receptor OS=Mus musculus OX=10090 GN=Hrh1 PE=1 SV=2	10.73	Control_MR_2	Control_MR_2
O35709	Ectoderm-neural cortex protein 1 OS=Mus musculus OX=10090 GN=Enc1 PE=2 SV=2	2.58	Control_MR_2	Control_MR_2
Q8R0Y6	Cytosolic 10-formyltetrahydrofolate dehydrogenase OS=Mus musculus OX=10090 GN=Aldh1l1 PE=1 SV=1	22.02	Control_MR_2	Control_MR_2
Q65Z40	Wings apart-like protein homolog OS=Mus musculus OX=10090 GN=Wapl PE=1 SV=2	14.59	Control_MR_2	Control_MR_2
Q8CHY6	Transcriptional repressor p66 alpha OS=Mus musculus OX=10090 GN=Gatad2a PE=1 SV=2	25.25	Control_MR_2	Control_MR_2
Q63880	Carboxylesterase 3A OS=Mus musculus OX=10090 GN=Ces3a PE=1 SV=2	23.28	Control_MR_2	Control_MR_2
Q04735	Cyclin-dependent kinase 16 OS=Mus musculus OX=10090 GN=Cdk16 PE=1 SV=1	10.12	Control_MR_2	Control_MR_2
P97393	Rho GTPase-activating protein 5 OS=Mus musculus OX=10090 GN=Arhgap5 PE=1 SV=2	11.46	Control_MR_2	Control_MR_2
Q8BGZ8	Zona pellucida-like domain-containing protein 1 OS=Mus musculus OX=10090 GN=Zpld1 PE=2 SV=1	6.47	Control_MR_2	Control_MR_2
Q8BGZ7	Keratin, type II cytoskeletal 75 OS=Mus musculus OX=10090 GN=Krt75 PE=1 SV=1	70.96	Control_MR_2	Control_MR_2
P21447	Multidrug resistance protein 1A OS=Mus musculus OX=10090 GN=Abcb1a PE=1 SV=3	5.04	Control_MR_2	Control_MR_2
Q80W35	Transmembrane protein 202 OS=Mus musculus OX=10090 GN=Tmem202 PE=2 SV=1	29.94	Control_MR_2	Control_MR_2
Q6RHR9	Membrane-associated guanylate kinase, WW and PDZ domain-containing protein 1 OS=Mus musculus OX=10090 GN=Magi1 PE=1 SV=1	10.27	Control_MR_2	Control_MR_2
Q80YX1	Tenascin OS=Mus musculus OX=10090 GN=Tnc PE=1 SV=1	14.04	Control_MR_2	Control_MR_2
P21440	Phosphatidylcholine translocator ABCB4 OS=Mus musculus OX=10090 GN=Abcb4 PE=1 SV=2	46.47	Control_MR_2	Control_MR_2
Q8VDR9	Dedicator of cytokinesis protein 6 OS=Mus musculus OX=10090 GN=Dock6 PE=1 SV=4	16.7	Control_MR_2	Control_MR_2
Q8VDR7	dTDP-D-glucose 4,6-dehydratase OS=Mus musculus OX=10090 GN=Tgds PE=2 SV=2	29.58	Control_MR_2	Control_MR_2
A2AM05	Centlein OS=Mus musculus OX=10090 GN=Cntln PE=1 SV=1	33.43	Control_MR_2	Control_MR_2
Q66JQ7	Kinetochore scaffold 1 OS=Mus musculus OX=10090 GN=Knl1 PE=1 SV=3	9.29	Control_MR_2	Control_MR_2
P55105	Bone morphogenetic protein 8B OS=Mus musculus OX=10090 GN=Bmp8b PE=1 SV=2	77.89	Control_MR_2	Control_MR_2
P30415	NK-tumor recognition protein OS=Mus musculus OX=10090 GN=Nktr PE=1 SV=4	15.52	Control_MR_2	Control_MR_2
Q8BGY9	High affinity choline transporter 1 OS=Mus musculus OX=10090 GN=Slc5a7 PE=1 SV=1	35.08	Control_MR_2	Control_MR_2
Q9WVL3	Solute carrier family 12 member 7 OS=Mus musculus OX=10090 GN=Slc12a7 PE=1 SV=1	38.34	Control_MR_2	Control_MR_2
Q6PCN3	Tau-tubulin kinase 1 OS=Mus musculus OX=10090 GN=Ttbk1 PE=1 SV=3	25.33	Control_MR_2	Control_MR_2
Q3UHX0	Nucleolar protein 8 OS=Mus musculus OX=10090 GN=Nol8 PE=1 SV=2	16.84	Control_MR_2	Control_MR_2
Q80YW5	B box and SPRY domain-containing protein OS=Mus musculus OX=10090 GN=Bspry PE=1 SV=1	11.61	Control_MR_2	Control_MR_2
Q3URK3	Methylcytosine dioxygenase TET1 OS=Mus musculus OX=10090 GN=Tet1 PE=1 SV=2	9.88	Control_MR_2	Control_MR_2
O08759	Ubiquitin-protein ligase E3A OS=Mus musculus OX=10090 GN=Ube3a PE=1 SV=2	16.96	Control_MR_2	Control_MR_2
P59808	SAM and SH3 domain-containing protein 1 OS=Mus musculus OX=10090 GN=Sash1 PE=1 SV=1	18.59	Control_MR_2	Control_MR_2
Q8BU30	Isoleucine--tRNA ligase, cytoplasmic OS=Mus musculus OX=10090 GN=Iars PE=1 SV=2	13.26	Control_MR_2	Control_MR_2
O08750	Nuclear factor interleukin-3-regulated protein OS=Mus musculus OX=10090 GN=Nfil3 PE=1 SV=1	6.65	Control_MR_2	Control_MR_2
Q6ZPF3	T-lymphoma invasion and metastasis-inducing protein 2 OS=Mus musculus OX=10090 GN=Tiam2 PE=1 SV=2	24.91	Control_MR_2	Control_MR_2
G5E870	E3 ubiquitin-protein ligase TRIP12 OS=Mus musculus OX=10090 GN=Trip12 PE=1 SV=1	34.72	Control_MR_2	Control_MR_2
Q62415	Apoptosis-stimulating of p53 protein 1 OS=Mus musculus OX=10090 GN=Ppp1r13b PE=1 SV=2	40.72	Control_MR_2	Control_MR_2
Q62413	Ephrin type-A receptor 6 OS=Mus musculus OX=10090 GN=Epha6 PE=2 SV=2	51.38	Control_MR_2	Control_MR_2
Q9R244	Short transient receptor potential channel 2 OS=Mus musculus OX=10090 GN=Trpc2 PE=2 SV=2	10.15	Control_MR_2	Control_MR_2
Q8VHJ5	Serine/threonine-protein kinase MARK1 OS=Mus musculus OX=10090 GN=Mark1 PE=1 SV=2	9.42	Control_MR_2	Control_MR_2
Q811D2	Ankyrin repeat domain-containing protein 26 OS=Mus musculus OX=10090 GN=Ankrd26 PE=1 SV=2	58.87	Control_MR_2	Control_MR_2
Q80VP5	Probable peptide chain release factor C12orf65 homolog, mitochondrial OS=Mus musculus OX=10090 PE=1 SV=1	119.79	Control_MR_2	Control_MR_2
Q3UV16	Inositol 1,4,5-trisphosphate receptor-interacting protein-like 2 OS=Mus musculus OX=10090 GN=Itpripl2 PE=2 SV=1	12.9	Control_MR_2	Control_MR_2
P62259	14-3-3 protein epsilon OS=Mus musculus OX=10090 GN=Ywhae PE=1 SV=1	64.92	Control_MR_2	Control_MR_2
Q8BWW9	Serine/threonine-protein kinase N2 OS=Mus musculus OX=10090 GN=Pkn2 PE=1 SV=3	32.36	Control_MR_2	Control_MR_2
P21784	V(D)J recombination-activating protein 2 OS=Mus musculus OX=10090 GN=Rag2 PE=1 SV=2	50.01	Control_MR_2	Control_MR_2
Q80Z71	Tenascin-N OS=Mus musculus OX=10090 GN=Tnn PE=1 SV=2	16.04	Control_MR_2	Control_MR_2
O08742	Platelet glycoprotein V OS=Mus musculus OX=10090 GN=Gp5 PE=1 SV=1	46.27	Control_MR_2	Control_MR_2
Q6ZPE2	Myotubularin-related protein 5 OS=Mus musculus OX=10090 GN=Sbf1 PE=1 SV=2	31.84	Control_MR_2	Control_MR_2
Q8VDP3	[F-actin]-monooxygenase MICAL1 OS=Mus musculus OX=10090 GN=Mical1 PE=1 SV=1	54.86	Control_MR_2	Control_MR_2
Q8VE11	Myotubularin-related protein 6 OS=Mus musculus OX=10090 GN=Mtmr6 PE=1 SV=1	40.01	Control_MR_2	Control_MR_2
Q5XJE5	RNA polymerase-associated protein LEO1 OS=Mus musculus OX=10090 GN=Leo1 PE=1 SV=2	27.01	Control_MR_2	Control_MR_2
Q60592	Microtubule-associated serine/threonine-protein kinase 2 OS=Mus musculus OX=10090 GN=Mast2 PE=1 SV=1	27.12	Control_MR_2	Control_MR_2
P97363	Serine palmitoyltransferase 2 OS=Mus musculus OX=10090 GN=Sptlc2 PE=1 SV=2	10.72	Control_MR_2	Control_MR_2
Q5BL07	Peroxisome biogenesis factor 1 OS=Mus musculus OX=10090 GN=Pex1 PE=1 SV=2	91.56	Control_MR_2	Control_MR_2
P46467	Vacuolar protein sorting-associated protein 4B OS=Mus musculus OX=10090 GN=Vps4b PE=1 SV=2	29.85	Control_MR_2	Control_MR_2
Q6PIX5	Inactive rhomboid protein 1 OS=Mus musculus OX=10090 GN=Rhbdf1 PE=1 SV=2	30.97	Control_MR_2	Control_MR_2
Q3V0C5	Ubiquitin carboxyl-terminal hydrolase 48 OS=Mus musculus OX=10090 GN=Usp48 PE=1 SV=2	44.9	Control_MR_2	Control_MR_2
Q80W04	Transmembrane and coiled-coil domains protein 2 OS=Mus musculus OX=10090 GN=Tmcc2 PE=1 SV=1	16.68	Control_MR_2	Control_MR_2
Q8BND5	Sulfhydryl oxidase 1 OS=Mus musculus OX=10090 GN=Qsox1 PE=1 SV=1	17.41	Control_MR_2	Control_MR_2
O08739	AMP deaminase 3 OS=Mus musculus OX=10090 GN=Ampd3 PE=1 SV=2	21.8	Control_MR_2	Control_MR_2
Q8BGW0	Protein THEMIS OS=Mus musculus OX=10090 GN=Themis PE=1 SV=1	8.88	Control_MR_2	Control_MR_2
Q61313	Transcription factor AP-2-beta OS=Mus musculus OX=10090 GN=Tfap2b PE=1 SV=2	4.16	Control_MR_2	Control_MR_2
P45377	Aldose reductase-related protein 2 OS=Mus musculus OX=10090 GN=Akr1b8 PE=1 SV=2	20.02	Control_MR_2	Control_MR_2
Q5U4C3	Splicing factor, arginine/serine-rich 19 OS=Mus musculus OX=10090 GN=Scaf1 PE=1 SV=1	22.01	Control_MR_2	Control_MR_2
P45376	Aldose reductase OS=Mus musculus OX=10090 GN=Akr1b1 PE=1 SV=3	26.73	Control_MR_2	Control_MR_2
Q5U4C1	G-protein coupled receptor-associated sorting protein 1 OS=Mus musculus OX=10090 GN=Gprasp1 PE=1 SV=1	6.64	Control_MR_2	Control_MR_2
Q9JMB7	Piwi-like protein 1 OS=Mus musculus OX=10090 GN=Piwil1 PE=1 SV=1	16.7	Control_MR_2	Control_MR_2
P12790	Cytochrome P450 2B9 OS=Mus musculus OX=10090 GN=Cyp2b9 PE=1 SV=2	39.07	Control_MR_2	Control_MR_2
P97358	TATA box-binding protein-associated factor RNA polymerase I subunit B OS=Mus musculus OX=10090 GN=Taf1b PE=1 SV=2	33.56	Control_MR_2	Control_MR_2
Q99J39	Malonyl-CoA decarboxylase, mitochondrial OS=Mus musculus OX=10090 GN=Mlycd PE=1 SV=1	29.03	Control_MR_2	Control_MR_2
B2RXC5	Zinc finger protein 382 OS=Mus musculus OX=10090 GN=Znf382 PE=1 SV=1	15.3	Control_MR_2	Control_MR_2
B2RXC1	Trafficking protein particle complex subunit 11 OS=Mus musculus OX=10090 GN=Trappc11 PE=1 SV=1	15.58	Control_MR_2	Control_MR_2
Q3V0B4	Cilia- and flagella-associated protein 65 OS=Mus musculus OX=10090 GN=Cfap65 PE=1 SV=1	34.62	Control_MR_2	Control_MR_2
Q9JMA7	Cytochrome P450 3A41 OS=Mus musculus OX=10090 GN=Cyp3a41a PE=1 SV=2	18	Control_MR_2	Control_MR_2
Q8C8U0	Liprin-beta-1 OS=Mus musculus OX=10090 GN=Ppfibp1 PE=1 SV=3	41.88	Control_MR_2	Control_MR_2
Q8CBH5	Major facilitator superfamily domain-containing protein 6 OS=Mus musculus OX=10090 GN=Mfsd6 PE=1 SV=1	26.96	Control_MR_2	Control_MR_2
P97347	Repetin OS=Mus musculus OX=10090 GN=Rptn PE=2 SV=2	1.67	Control_MR_2	Control_MR_2
Q8R3Z5	Voltage-dependent L-type calcium channel subunit beta-1 OS=Mus musculus OX=10090 GN=Cacnb1 PE=1 SV=1	11.13	Control_MR_2	Control_MR_2
Q8R151	NFX1-type zinc finger-containing protein 1 OS=Mus musculus OX=10090 GN=Znfx1 PE=1 SV=3	15.31	Control_MR_2	Control_MR_2
Q3U962	Collagen alpha-2(V) chain OS=Mus musculus OX=10090 GN=Col5a2 PE=1 SV=1	25.07	Control_MR_2	Control_MR_2
Q80VM8	Paraneoplastic antigen-like protein 8A OS=Mus musculus OX=10090 GN=Pnma8a PE=2 SV=1	17.82	Control_MR_2	Control_MR_2
Q6SP97	Enkurin OS=Mus musculus OX=10090 GN=Enkur PE=1 SV=1	48.02	Control_MR_2	Control_MR_2
P13504	Interleukin-1 receptor type 1 OS=Mus musculus OX=10090 GN=Il1r1 PE=1 SV=1	48.35	Control_MR_2	Control_MR_2
Q9QZC7	Pleckstrin homology domain-containing family B member 2 OS=Mus musculus OX=10090 GN=Plekhb2 PE=1 SV=1	19.62	Control_MR_2	Control_MR_2
Q80VM3	Tetratricopeptide repeat protein 29 OS=Mus musculus OX=10090 GN=Ttc29 PE=2 SV=1	75.37	Control_MR_2	Control_MR_2
Q9R210	Transcription factor EB OS=Mus musculus OX=10090 GN=Tfeb PE=1 SV=2	44.06	Control_MR_2	Control_MR_2
Q9QZC2	Plexin-C1 OS=Mus musculus OX=10090 GN=Plxnc1 PE=1 SV=1	23.07	Control_MR_2	Control_MR_2
Q8C5N3	Pre-mRNA-splicing factor CWC22 homolog OS=Mus musculus OX=10090 GN=Cwc22 PE=1 SV=1	11.09	Control_MR_2	Control_MR_2
Q4PNJ2	Sodium/potassium-transporting ATPase subunit beta-1-interacting protein 2 OS=Mus musculus OX=10090 GN=Nkain2 PE=1 SV=2	120	Control_MR_2	Control_MR_2
P20664	DNA primase small subunit OS=Mus musculus OX=10090 GN=Prim1 PE=1 SV=1	39.7	Control_MR_2	Control_MR_2
Q8R0S4	Voltage-dependent L-type calcium channel subunit beta-4 OS=Mus musculus OX=10090 GN=Cacnb4 PE=1 SV=2	11.47	Control_MR_2	Control_MR_2
P28481	Collagen alpha-1(II) chain OS=Mus musculus OX=10090 GN=Col2a1 PE=1 SV=2	44.41	Control_MR_2	Control_MR_2
Q8R0S1	Cyclic AMP-dependent transcription factor ATF-7 OS=Mus musculus OX=10090 GN=Atf7 PE=2 SV=1	27.17	Control_MR_2	Control_MR_2
Q9Z2W9	Glutamate receptor 3 OS=Mus musculus OX=10090 GN=Gria3 PE=1 SV=2	23.43	Control_MR_2	Control_MR_2
Q80Z38	SH3 and multiple ankyrin repeat domains protein 2 OS=Mus musculus OX=10090 GN=Shank2 PE=1 SV=2	17.73	Control_MR_2	Control_MR_2
Q8BGT5	Alanine aminotransferase 2 OS=Mus musculus OX=10090 GN=Gpt2 PE=1 SV=1	10.37	Control_MR_2	Control_MR_2
Q80YR6	DNA endonuclease RBBP8 OS=Mus musculus OX=10090 GN=Rbbp8 PE=1 SV=1	8.61	Control_MR_2	Control_MR_2
P18052	Receptor-type tyrosine-protein phosphatase alpha OS=Mus musculus OX=10090 GN=Ptpra PE=1 SV=3	17.53	Control_MR_2	Control_MR_2
Q80YR2	Protein FAM160B2 OS=Mus musculus OX=10090 GN=Fam160b2 PE=1 SV=2	13.64	Control_MR_2	Control_MR_2
Q9QZB0	Regulator of G-protein signaling 17 OS=Mus musculus OX=10090 GN=Rgs17 PE=1 SV=1	9.18	Control_MR_2	Control_MR_2
Q02858	Angiopoietin-1 receptor OS=Mus musculus OX=10090 GN=Tek PE=1 SV=2	6.31	Control_MR_2	Control_MR_2
P31809	Carcinoembryonic antigen-related cell adhesion molecule 1 OS=Mus musculus OX=10090 GN=Ceacam1 PE=1 SV=1	9.78	Control_MR_2	Control_MR_2
P48962	ADP/ATP translocase 1 OS=Mus musculus OX=10090 GN=Slc25a4 PE=1 SV=4	36.59	Control_MR_2	Control_MR_2
P97329	Kinesin-like protein KIF20A OS=Mus musculus OX=10090 GN=Kif20a PE=1 SV=1	36.22	Control_MR_2	Control_MR_2
P86174	BEN domain-containing protein 4 OS=Mus musculus OX=10090 GN=Bend4 PE=4 SV=2	23.74	Control_MR_2	Control_MR_2
Q5SNZ0	Girdin OS=Mus musculus OX=10090 GN=Ccdc88a PE=1 SV=2	58.03	Control_MR_2	Control_MR_2
Q80VK6	Rho guanine nucleotide exchange factor 38 OS=Mus musculus OX=10090 GN=Arhgef38 PE=1 SV=2	89.22	Control_MR_2	Control_MR_2
Q9Z2V4	Phosphoenolpyruvate carboxykinase, cytosolic [GTP] OS=Mus musculus OX=10090 GN=Pck1 PE=1 SV=1	29.72	Control_MR_2	Control_MR_2
Q6NWV3	Intraflagellar transport protein 122 homolog OS=Mus musculus OX=10090 GN=Ift122 PE=1 SV=1	25.6	Control_MR_2	Control_MR_2
A2ABU4	Myomesin-3 OS=Mus musculus OX=10090 GN=Myom3 PE=1 SV=1	3.29	Control_MR_2	Control_MR_2
Q9EQW7	Kinesin-like protein KIF13A OS=Mus musculus OX=10090 GN=Kif13a PE=1 SV=1	48.59	Control_MR_2	Control_MR_2
D3YYU8	Obscurin-like protein 1 OS=Mus musculus OX=10090 GN=Obsl1 PE=1 SV=1	46.52	Control_MR_2	Control_MR_2
P97318	Disabled homolog 1 OS=Mus musculus OX=10090 GN=Dab1 PE=1 SV=2	7.89	Control_MR_2	Control_MR_2
Q8BH34	Semaphorin-3D OS=Mus musculus OX=10090 GN=Sema3d PE=1 SV=1	1.05	Control_MR_2	Control_MR_2
Q61627	Glutamate receptor ionotropic, delta-1 OS=Mus musculus OX=10090 GN=Grid1 PE=1 SV=2	39.93	Control_MR_2	Control_MR_2
Q8C2E4	Pentatricopeptide repeat-containing protein 1, mitochondrial OS=Mus musculus OX=10090 GN=Ptcd1 PE=2 SV=2	60.61	Control_MR_2	Control_MR_2
Q80Z10	Astrotactin-2 OS=Mus musculus OX=10090 GN=Astn2 PE=1 SV=2	10.77	Control_MR_2	Control_MR_2
Q8BWQ4	Cap-specific mRNA (nucleoside-2'-O-)-methyltransferase 2 OS=Mus musculus OX=10090 GN=Cmtr2 PE=2 SV=1	23.47	Control_MR_2	Control_MR_2
Q8BX22	Sal-like protein 4 OS=Mus musculus OX=10090 GN=Sall4 PE=1 SV=2	30.47	Control_MR_2	Control_MR_2
Q8BZW2	Ankyrin repeat domain-containing protein SOWAHB OS=Mus musculus OX=10090 GN=Sowahb PE=1 SV=1	24.15	Control_MR_2	Control_MR_2
Q3U2E2	Zinc finger MYM-type protein 5 OS=Mus musculus OX=10090 GN=Zmym5 PE=2 SV=2	74.54	Control_MR_2	Control_MR_2
A6PWV3	Izumo sperm-egg fusion protein 3 OS=Mus musculus OX=10090 GN=Izumo3 PE=1 SV=1	45.84	Control_MR_2	Control_MR_2
Q9R1L5	Microtubule-associated serine/threonine-protein kinase 1 OS=Mus musculus OX=10090 GN=Mast1 PE=1 SV=3	23	Control_MR_2	Control_MR_2
B2RU80	Receptor-type tyrosine-protein phosphatase beta OS=Mus musculus OX=10090 GN=Ptprb PE=1 SV=1	22.82	Control_MR_2	Control_MR_2
Q8K0F1	TBC1 domain family member 23 OS=Mus musculus OX=10090 GN=Tbc1d23 PE=1 SV=1	13.88	Control_MR_2	Control_MR_2
B9EKI3	TATA element modulatory factor OS=Mus musculus OX=10090 GN=Tmf1 PE=1 SV=2	21.58	Control_MR_2	Control_MR_2
O55222	Integrin-linked protein kinase OS=Mus musculus OX=10090 GN=Ilk PE=1 SV=2	69.58	Control_MR_2	Control_MR_2
P53569	CCAAT/enhancer-binding protein zeta OS=Mus musculus OX=10090 GN=Cebpz PE=1 SV=2	3.68	Control_MR_2	Control_MR_2
Q9ER64	Oxysterol-binding protein-related protein 5 OS=Mus musculus OX=10090 GN=Osbpl5 PE=1 SV=3	11.89	Control_MR_2	Control_MR_2
P53564	Homeobox protein cut-like 1 OS=Mus musculus OX=10090 GN=Cux1 PE=1 SV=3	34.7	Control_MR_2	Control_MR_2
Q60520	Paired amphipathic helix protein Sin3a OS=Mus musculus OX=10090 GN=Sin3a PE=1 SV=3	15.51	Control_MR_2	Control_MR_2
Q8CI03	FLYWCH-type zinc finger-containing protein 1 OS=Mus musculus OX=10090 GN=Flywch1 PE=1 SV=2	4.23	Control_MR_2	Control_MR_2
Q9R1K9	Centrin-2 OS=Mus musculus OX=10090 GN=Cetn2 PE=1 SV=1	26.15	Control_MR_2	Control_MR_2
Q569L8	Centromere protein J OS=Mus musculus OX=10090 GN=Cenpj PE=2 SV=2	28.76	Control_MR_2	Control_MR_2
Q6VV64	Potassium channel subfamily K member 18 OS=Mus musculus OX=10090 GN=Kcnk18 PE=1 SV=1	64.79	Control_MR_2	Control_MR_2
Q3UKU1	RNA polymerase II elongation factor ELL2 OS=Mus musculus OX=10090 GN=Ell2 PE=1 SV=2	7.89	Control_MR_2	Control_MR_2
Q5ND28	Scavenger receptor class F member 1 OS=Mus musculus OX=10090 GN=Scarf1 PE=1 SV=1	3.86	Control_MR_2	Control_MR_2
Q6F3F9	Adhesion G-protein coupled receptor G6 OS=Mus musculus OX=10090 GN=Adgrg6 PE=1 SV=1	4.02	Control_MR_2	Control_MR_2
Q80VH0	B-cell scaffold protein with ankyrin repeats OS=Mus musculus OX=10090 GN=Bank1 PE=1 SV=3	12.83	Control_MR_2	Control_MR_2
Q8BX09	Retinoblastoma-binding protein 5 OS=Mus musculus OX=10090 GN=Rbbp5 PE=1 SV=2	25.23	Control_MR_2	Control_MR_2
Q9JJ59	ATP-binding cassette sub-family B member 9 OS=Mus musculus OX=10090 GN=Abcb9 PE=2 SV=1	13.74	Control_MR_2	Control_MR_2
P34152	Focal adhesion kinase 1 OS=Mus musculus OX=10090 GN=Ptk2 PE=1 SV=3	33.52	Control_MR_2	Control_MR_2
Q3TTI8	Testis-expressed protein 52 OS=Mus musculus OX=10090 GN=Tex52 PE=2 SV=1	1.29	Control_MR_2	Control_MR_2
Q9EQT6	Synaptotagmin-13 OS=Mus musculus OX=10090 GN=Syt13 PE=1 SV=1	50.03	Control_MR_2	Control_MR_2
O35083	1-acyl-sn-glycerol-3-phosphate acyltransferase alpha OS=Mus musculus OX=10090 GN=Agpat1 PE=1 SV=1	25.03	Control_MR_2	Control_MR_2
O35082	Klotho OS=Mus musculus OX=10090 GN=Kl PE=1 SV=2	36.67	Control_MR_2	Control_MR_2
P35235	Tyrosine-protein phosphatase non-receptor type 11 OS=Mus musculus OX=10090 GN=Ptpn11 PE=1 SV=2	10.99	Control_MR_2	Control_MR_2
Q99LQ1	MAP3K12-binding inhibitory protein 1 OS=Mus musculus OX=10090 GN=Mbip PE=1 SV=1	14.04	Control_MR_2	Control_MR_2
O70263	E3 ubiquitin-protein ligase LNX OS=Mus musculus OX=10090 GN=Lnx1 PE=1 SV=1	6.38	Control_MR_2	Control_MR_2
Q4QY64	ATPase family AAA domain-containing protein 5 OS=Mus musculus OX=10090 GN=Atad5 PE=1 SV=1	15.01	Control_MR_2	Control_MR_2
Q0VG85	Coiled-coil domain-containing protein 162 OS=Mus musculus OX=10090 GN=Ccdc162p PE=1 SV=4	25.1	Control_MR_2	Control_MR_2
Q9ER47	Potassium voltage-gated channel subfamily H member 7 OS=Mus musculus OX=10090 GN=Kcnh7 PE=1 SV=2	4	Control_MR_2	Control_MR_2
Q8VDG6	Mitogen-activated protein kinase kinase kinase 21 OS=Mus musculus OX=10090 GN=Map3k21 PE=1 SV=2	40.38	Control_MR_2	Control_MR_2
Q8BZT2	Putative E3 ubiquitin-protein ligase SH3RF2 OS=Mus musculus OX=10090 GN=Sh3rf2 PE=1 SV=2	40.94	Control_MR_2	Control_MR_2
Q8R3S6	Exocyst complex component 1 OS=Mus musculus OX=10090 GN=Exoc1 PE=1 SV=4	37.13	Control_MR_2	Control_MR_2
O35071	Kinesin-like protein KIF1C OS=Mus musculus OX=10090 GN=Kif1c PE=1 SV=2	35.98	Control_MR_2	Control_MR_2
Q60862	Origin recognition complex subunit 2 OS=Mus musculus OX=10090 GN=Orc2 PE=1 SV=1	18.13	Control_MR_2	Control_MR_2
A2ARP1	Inositol hexakisphosphate and diphosphoinositol-pentakisphosphate kinase 1 OS=Mus musculus OX=10090 GN=Ppip5k1 PE=1 SV=1	9.48	Control_MR_2	Control_MR_2
Q2TJ95	R-spondin-3 OS=Mus musculus OX=10090 GN=Rspo3 PE=1 SV=2	124.97	Control_MR_2	Control_MR_2
Q5PRF0	HEAT repeat-containing protein 5A OS=Mus musculus OX=10090 GN=Heatr5a PE=1 SV=2	33.83	Control_MR_2	Control_MR_2
Q9Z2Q5	39S ribosomal protein L40, mitochondrial OS=Mus musculus OX=10090 GN=Mrpl40 PE=1 SV=2	39.04	Control_MR_2	Control_MR_2
P35585	AP-1 complex subunit mu-1 OS=Mus musculus OX=10090 GN=Ap1m1 PE=1 SV=3	12.72	Control_MR_2	Control_MR_2
Q9Z2Q2	Lysine-rich nucleolar protein 1 OS=Mus musculus OX=10090 GN=Knop1 PE=1 SV=2	17.8	Control_MR_2	Control_MR_2
Q00623	Apolipoprotein A-I OS=Mus musculus OX=10090 GN=Apoa1 PE=1 SV=2	37.88	Control_MR_2	Control_MR_2
Q3UXL4	Centrosomal protein kizuna OS=Mus musculus OX=10090 GN=Kiz PE=1 SV=1	29.77	Control_MR_2	Control_MR_2
P62515	POU domain, class 3, transcription factor 4 OS=Mus musculus OX=10090 GN=Pou3f4 PE=2 SV=1	64.75	Control_MR_2	Control_MR_2
Q3ZT31	Sorting nexin-25 OS=Mus musculus OX=10090 GN=Snx25 PE=1 SV=3	19.85	Control_MR_2	Control_MR_2
Q9JM99	Proteoglycan 4 OS=Mus musculus OX=10090 GN=Prg4 PE=1 SV=2	24.3	Control_MR_2	Control_MR_2
Q8CEF9	Transmembrane protein 132C OS=Mus musculus OX=10090 GN=Tmem132c PE=2 SV=3	40.47	Control_MR_2	Control_MR_2
Q9CYH2	Redox-regulatory protein FAM213A OS=Mus musculus OX=10090 GN=Fam213a PE=1 SV=2	47.62	Control_MR_2	Control_MR_2
Q8VDF3	Death-associated protein kinase 2 OS=Mus musculus OX=10090 GN=Dapk2 PE=1 SV=1	11.97	Control_MR_2	Control_MR_2
O88492	Perilipin-4 OS=Mus musculus OX=10090 GN=Plin4 PE=1 SV=2	11.35	Control_MR_2	Control_MR_2
Q99P69	Kinetochore protein Nuf2 OS=Mus musculus OX=10090 GN=Nuf2 PE=1 SV=2	37.05	Control_MR_2	Control_MR_2
B7ZMP1	Probable Xaa-Pro aminopeptidase 3 OS=Mus musculus OX=10090 GN=Xpnpep3 PE=1 SV=1	16.11	Control_MR_2	Control_MR_2
P47810	Wee1-like protein kinase OS=Mus musculus OX=10090 GN=Wee1 PE=1 SV=2	0.25	Control_MR_2	Control_MR_2
Q8BJS8	Mdm2-binding protein OS=Mus musculus OX=10090 GN=Mtbp PE=1 SV=1	25.79	Control_MR_2	Control_MR_2
Q9Z315	U4/U6.U5 tri-snRNP-associated protein 1 OS=Mus musculus OX=10090 GN=Sart1 PE=1 SV=1	12.04	Control_MR_2	Control_MR_2
Q8BJS7	Microtubule-associated protein 10 OS=Mus musculus OX=10090 GN=Map10 PE=1 SV=1	15.46	Control_MR_2	Control_MR_2
Q8BTF7	DNA ligase 4 OS=Mus musculus OX=10090 GN=Lig4 PE=2 SV=2	67.68	Control_MR_2	Control_MR_2
P60330	Separin OS=Mus musculus OX=10090 GN=Espl1 PE=1 SV=1	33.23	Control_MR_2	Control_MR_2
Q9JJ28	Protein flightless-1 homolog OS=Mus musculus OX=10090 GN=Flii PE=1 SV=1	17.81	Control_MR_2	Control_MR_2
Q8CEE7	Retinol dehydrogenase 13 OS=Mus musculus OX=10090 GN=Rdh13 PE=1 SV=1	32.56	Control_MR_2	Control_MR_2
Q8CEE6	PAS domain-containing serine/threonine-protein kinase OS=Mus musculus OX=10090 GN=Pask PE=1 SV=3	18.42	Control_MR_2	Control_MR_2
P19426	Negative elongation factor E OS=Mus musculus OX=10090 GN=Nelfe PE=1 SV=2	27.39	Control_MR_2	Control_MR_2
Q8R420	ATP-binding cassette sub-family A member 3 OS=Mus musculus OX=10090 GN=Abca3 PE=1 SV=3	53.81	Control_MR_2	Control_MR_2
Q3UHK3	Protein GREB1 OS=Mus musculus OX=10090 GN=Greb1 PE=2 SV=2	2.46	Control_MR_2	Control_MR_2
F2Z472	Seminal vesicle secretory protein 3A OS=Mus musculus OX=10090 GN=Svs3a PE=1 SV=1	50.96	Control_MR_2	Control_MR_2
Q9QYY8	Spastin OS=Mus musculus OX=10090 GN=Spast PE=1 SV=3	11.06	Control_MR_2	Control_MR_2
Q6T3U4	NPC1-like intracellular cholesterol transporter 1 OS=Mus musculus OX=10090 GN=Npc1l1 PE=2 SV=1	9.17	Control_MR_2	Control_MR_2
P52792	Glucokinase OS=Mus musculus OX=10090 GN=Gck PE=1 SV=1	30.59	Control_MR_2	Control_MR_2
P61407	Tudor domain-containing protein 6 OS=Mus musculus OX=10090 GN=Tdrd6 PE=1 SV=1	47.39	Control_MR_2	Control_MR_2
Q6VUP9	Transcription factor AP-2-epsilon OS=Mus musculus OX=10090 GN=Tfap2e PE=1 SV=2	9.58	Control_MR_2	Control_MR_2
Q80VC9	Calmodulin-regulated spectrin-associated protein 3 OS=Mus musculus OX=10090 GN=Camsap3 PE=1 SV=1	43.35	Control_MR_2	Control_MR_2
Q3V079	Basal body-orientation factor 1 OS=Mus musculus OX=10090 GN=Bbof1 PE=2 SV=2	9.68	Control_MR_2	Control_MR_2
O70589	Peripheral plasma membrane protein CASK OS=Mus musculus OX=10090 GN=Cask PE=1 SV=2	27.03	Control_MR_2	Control_MR_2
Q8BJQ9	Chondroitin sulfate N-acetylgalactosaminyltransferase 1 OS=Mus musculus OX=10090 GN=Csgalnact1 PE=2 SV=1	19.17	Control_MR_2	Control_MR_2
Q9D495	Synaptonemal complex central element protein 1 OS=Mus musculus OX=10090 GN=Syce1 PE=1 SV=1	35.13	Control_MR_2	Control_MR_2
A2AF47	Dedicator of cytokinesis protein 11 OS=Mus musculus OX=10090 GN=Dock11 PE=1 SV=1	12.39	Control_MR_2	Control_MR_2
O88466	Zinc finger protein 106 OS=Mus musculus OX=10090 GN=Znf106 PE=1 SV=3	15.24	Control_MR_2	Control_MR_2
Q9JJ04	Beta-1,4-galactosyltransferase 4 OS=Mus musculus OX=10090 GN=B4galt4 PE=2 SV=1	14.15	Control_MR_2	Control_MR_2
P58069	Ras GTPase-activating protein 2 OS=Mus musculus OX=10090 GN=Rasa2 PE=1 SV=2	16.52	Control_MR_2	Control_MR_2
Q9ER04	Transmembrane protease serine 5 OS=Mus musculus OX=10090 GN=Tmprss5 PE=2 SV=3	2.28	Control_MR_2	Control_MR_2
Q6P9L6	Kinesin-like protein KIF15 OS=Mus musculus OX=10090 GN=Kif15 PE=1 SV=1	26.98	Control_MR_2	Control_MR_2
P28740	Kinesin-like protein KIF2A OS=Mus musculus OX=10090 GN=Kif2a PE=1 SV=2	19.44	Control_MR_2	Control_MR_2
P97953	Vascular endothelial growth factor C OS=Mus musculus OX=10090 GN=Vegfc PE=1 SV=1	27.07	Control_MR_2	Control_MR_2
Q810U4	Neuronal cell adhesion molecule OS=Mus musculus OX=10090 GN=Nrcam PE=1 SV=2	16.39	Control_MR_2	Control_MR_2
O70576	Cohesin subunit SA-3 OS=Mus musculus OX=10090 GN=Stag3 PE=1 SV=2	44.81	Control_MR_2	Control_MR_2
Q8R0H9	ADP-ribosylation factor-binding protein GGA1 OS=Mus musculus OX=10090 GN=Gga1 PE=1 SV=1	8.46	Control_MR_2	Control_MR_2
Q60817	Nascent polypeptide-associated complex subunit alpha OS=Mus musculus OX=10090 GN=Naca PE=1 SV=1	3.21	Control_MR_2	Control_MR_2
A0JP43	EF-hand calcium-binding domain-containing protein 5 OS=Mus musculus OX=10090 GN=Efcab5 PE=1 SV=2	54.16	Control_MR_2	Control_MR_2
Q9DCV6	Death ligand signal enhancer OS=Mus musculus OX=10090 GN=Kiaa0141 PE=2 SV=1	48.86	Control_MR_2	Control_MR_2
Q8R3N1	Nucleolar protein 14 OS=Mus musculus OX=10090 GN=Nop14 PE=1 SV=2	35.09	Control_MR_2	Control_MR_2
Q9QVP9	Protein-tyrosine kinase 2-beta OS=Mus musculus OX=10090 GN=Ptk2b PE=1 SV=2	9.83	Control_MR_2	Control_MR_2
Q80VA5	SH3 domain and tetratricopeptide repeat-containing protein 2 OS=Mus musculus OX=10090 GN=Sh3tc2 PE=1 SV=2	31.96	Control_MR_2	Control_MR_2
Q8BGI4	Protein FAM13A OS=Mus musculus OX=10090 GN=Fam13a PE=1 SV=1	16.33	Control_MR_2	Control_MR_2
Q7TQG1	Pleckstrin homology domain-containing family A member 6 OS=Mus musculus OX=10090 GN=Plekha6 PE=1 SV=1	78.02	Control_MR_2	Control_MR_2
A2A5R2	Brefeldin A-inhibited guanine nucleotide-exchange protein 2 OS=Mus musculus OX=10090 GN=Arfgef2 PE=1 SV=1	12.22	Control_MR_2	Control_MR_2
Q2KN98	Cytospin-A OS=Mus musculus OX=10090 GN=Specc1l PE=1 SV=1	44.03	Control_MR_2	Control_MR_2
Q8R0G9	Nuclear pore complex protein Nup133 OS=Mus musculus OX=10090 GN=Nup133 PE=1 SV=2	24.62	Control_MR_2	Control_MR_2
P42337	Phosphatidylinositol 4,5-bisphosphate 3-kinase catalytic subunit alpha isoform OS=Mus musculus OX=10090 GN=Pik3ca PE=1 SV=2	5.34	Control_MR_2	Control_MR_2
Q9JIM3	DNA excision repair protein ERCC-6-like 2 OS=Mus musculus OX=10090 GN=Ercc6l2 PE=1 SV=3	32.12	Control_MR_2	Control_MR_2
Q5IR70	Cancer-associated gene 1 protein homolog OS=Mus musculus OX=10090 GN=Cage1 PE=1 SV=2	18.67	Control_MR_2	Control_MR_2
Q8CHG3	GRIP and coiled-coil domain-containing protein 2 OS=Mus musculus OX=10090 GN=Gcc2 PE=1 SV=2	16.63	Control_MR_2	Control_MR_2
Q925T6	Glutamate receptor-interacting protein 1 OS=Mus musculus OX=10090 GN=Grip1 PE=1 SV=1	24.26	Control_MR_2	Control_MR_2
Q99LJ1	Tissue alpha-L-fucosidase OS=Mus musculus OX=10090 GN=Fuca1 PE=1 SV=1	27.09	Control_MR_2	Control_MR_2
Q8BGH2	Sorting and assembly machinery component 50 homolog OS=Mus musculus OX=10090 GN=Samm50 PE=1 SV=1	24.72	Control_MR_2	Control_MR_2
Q99388	Component of Sp100-rs OS=Mus musculus OX=10090 GN=Csprs PE=2 SV=1	62.48	Control_MR_2	Control_MR_2
Q8BWG4	Uncharacterized protein KIAA1755 homolog OS=Mus musculus OX=10090 PE=2 SV=2	37.81	Control_MR_2	Control_MR_2
Q5NCI0	Up-regulator of cell proliferation OS=Mus musculus OX=10090 GN=Urgcp PE=2 SV=1	10.58	Control_MR_2	Control_MR_2
Q9JIL4	Na(+)/H(+) exchange regulatory cofactor NHE-RF3 OS=Mus musculus OX=10090 GN=Pdzk1 PE=1 SV=1	13.25	Control_MR_2	Control_MR_2
Q62095	ATP-dependent RNA helicase DDX3Y OS=Mus musculus OX=10090 GN=Ddx3y PE=1 SV=2	2.56	Control_MR_2	Control_MR_2
Q9R1B9	Slit homolog 2 protein OS=Mus musculus OX=10090 GN=Slit2 PE=2 SV=2	10.12	Control_MR_2	Control_MR_2
Q5RJI5	Serine/threonine-protein kinase BRSK1 OS=Mus musculus OX=10090 GN=Brsk1 PE=1 SV=1	64.46	Control_MR_2	Control_MR_2
Q3V037	Uncharacterized protein C6orf163 homolog OS=Mus musculus OX=10090 GN=Gm136 PE=2 SV=1	27.84	Control_MR_2	Control_MR_2
P41230	Lysine-specific demethylase 5C OS=Mus musculus OX=10090 GN=Kdm5c PE=1 SV=4	20.1	Control_MR_2	Control_MR_2
P58389	Serine/threonine-protein phosphatase 2A activator OS=Mus musculus OX=10090 GN=Ptpa PE=1 SV=1	12.26	Control_MR_2	Control_MR_2
P28704	Retinoic acid receptor RXR-beta OS=Mus musculus OX=10090 GN=Rxrb PE=1 SV=2	7.15	Control_MR_2	Control_MR_2
Q8R3K3	Pentatricopeptide repeat-containing protein 2, mitochondrial OS=Mus musculus OX=10090 GN=Ptcd2 PE=1 SV=1	35.71	Control_MR_2	Control_MR_2
Q69Z38	Pseudopodium-enriched atypical kinase 1 OS=Mus musculus OX=10090 GN=Peak1 PE=1 SV=4	28.51	Control_MR_2	Control_MR_2
Q9WV95	Pleckstrin homology-like domain family A member 3 OS=Mus musculus OX=10090 GN=Phlda3 PE=1 SV=1	55.19	Control_MR_2	Control_MR_2
Q9WUX5	Protein MRVI1 OS=Mus musculus OX=10090 GN=Mrvi1 PE=1 SV=2	55.14	Control_MR_2	Control_MR_2
Q9Z2I8	Succinate--CoA ligase [GDP-forming] subunit beta, mitochondrial OS=Mus musculus OX=10090 GN=Suclg2 PE=1 SV=3	90.7	Control_MR_2	Control_MR_2
Q9WV92	Band 4.1-like protein 3 OS=Mus musculus OX=10090 GN=Epb41l3 PE=1 SV=1	23.6	Control_MR_2	Control_MR_2
Q9R1A3	Netrin-3 OS=Mus musculus OX=10090 GN=Ntn3 PE=2 SV=1	25.85	Control_MR_2	Control_MR_2
Q9D3S3	Sorting nexin-29 OS=Mus musculus OX=10090 GN=Snx29 PE=1 SV=2	13.67	Control_MR_2	Control_MR_2
Q9D0M0	Exosome complex exonuclease RRP42 OS=Mus musculus OX=10090 GN=Exosc7 PE=1 SV=2	28.73	Control_MR_2	Control_MR_2
Q3TN34	MICAL-like protein 2 OS=Mus musculus OX=10090 GN=Micall2 PE=1 SV=1	28.67	Control_MR_2	Control_MR_2
O88413	Tubby-related protein 3 OS=Mus musculus OX=10090 GN=Tulp3 PE=1 SV=1	21.05	Control_MR_2	Control_MR_2
P25799	Nuclear factor NF-kappa-B p105 subunit OS=Mus musculus OX=10090 GN=Nfkb1 PE=1 SV=2	7.35	Control_MR_2	Control_MR_2
Q9JM13	Rab5 GDP/GTP exchange factor OS=Mus musculus OX=10090 GN=Rabgef1 PE=1 SV=1	64.17	Control_MR_2	Control_MR_2
P08207	Protein S100-A10 OS=Mus musculus OX=10090 GN=S100a10 PE=1 SV=2	93.4	Control_MR_2	Control_MR_2
A2AUM9	Centrosomal protein of 152 kDa OS=Mus musculus OX=10090 GN=Cep152 PE=1 SV=1	19.98	Control_MR_2	Control_MR_2
Q922K7	Probable 28S rRNA (cytosine-C(5))-methyltransferase OS=Mus musculus OX=10090 GN=Nop2 PE=1 SV=1	22.47	Control_MR_2	Control_MR_2
Q8BGE7	Tripartite motif-containing protein 6 OS=Mus musculus OX=10090 GN=Trim6 PE=1 SV=1	33.59	Control_MR_2	Control_MR_2
Q52KR2	Leucine-rich repeats and immunoglobulin-like domains protein 2 OS=Mus musculus OX=10090 GN=Lrig2 PE=1 SV=1	15.22	Control_MR_2	Control_MR_2
Q6NZN1	Peroxisome proliferator-activated receptor gamma coactivator-related protein 1 OS=Mus musculus OX=10090 GN=Pprc1 PE=1 SV=1	11.38	Control_MR_2	Control_MR_2
Q6NZN0	RNA-binding protein 26 OS=Mus musculus OX=10090 GN=Rbm26 PE=1 SV=2	20.2	Control_MR_2	Control_MR_2
Q8CB77	Elongin-A OS=Mus musculus OX=10090 GN=Eloa PE=1 SV=3	42.04	Control_MR_2	Control_MR_2
Q9JII1	72 kDa inositol polyphosphate 5-phosphatase OS=Mus musculus OX=10090 GN=Inpp5e PE=1 SV=1	33.46	Control_MR_2	Control_MR_2
A2AKY4	Zinc finger protein 804A OS=Mus musculus OX=10090 GN=Znf804a PE=2 SV=1	5.53	Control_MR_2	Control_MR_2
E9Q5R7	NACHT, LRR and PYD domains-containing protein 12 OS=Mus musculus OX=10090 GN=Nlrp12 PE=2 SV=1	20.05	Control_MR_2	Control_MR_2
Q8R0C0	DNA-directed RNA polymerase III subunit RPC7-like OS=Mus musculus OX=10090 GN=Polr3gl PE=2 SV=2	27.3	Control_MR_2	Control_MR_2
O54732	Matrix metalloproteinase-15 OS=Mus musculus OX=10090 GN=Mmp15 PE=2 SV=1	25.46	Control_MR_2	Control_MR_2
B2RX14	Terminal uridylyltransferase 4 OS=Mus musculus OX=10090 GN=Zcchc11 PE=1 SV=2	35.89	Control_MR_2	Control_MR_2
Q922J3	CAP-Gly domain-containing linker protein 1 OS=Mus musculus OX=10090 GN=Clip1 PE=1 SV=1	57.18	Control_MR_2	Control_MR_2
Q06890	Clusterin OS=Mus musculus OX=10090 GN=Clu PE=1 SV=1	8.71	Control_MR_2	Control_MR_2
Q925P2	Carcinoembryonic antigen-related cell adhesion molecule 2 OS=Mus musculus OX=10090 GN=Ceacam2 PE=1 SV=3	12.7	Control_MR_2	Control_MR_2
Q3U1V8	Mitogen-activated protein kinase kinase kinase 9 OS=Mus musculus OX=10090 GN=Map3k9 PE=2 SV=2	40.69	Control_MR_2	Control_MR_2
Q9JLN6	Disintegrin and metalloproteinase domain-containing protein 28 OS=Mus musculus OX=10090 GN=Adam28 PE=1 SV=3	46.93	Control_MR_2	Control_MR_2
Q8CHB8	Tubulin polyglutamylase TTLL5 OS=Mus musculus OX=10090 GN=Ttll5 PE=2 SV=3	47.07	Control_MR_2	Control_MR_2
Q9EQH2	Endoplasmic reticulum aminopeptidase 1 OS=Mus musculus OX=10090 GN=Erap1 PE=1 SV=2	14.34	Control_MR_2	Control_MR_2
Q01097	Glutamate receptor ionotropic, NMDA 2B OS=Mus musculus OX=10090 GN=Grin2b PE=1 SV=3	21.02	Control_MR_2	Control_MR_2
Q9WUU9	Germinal-center associated nuclear protein OS=Mus musculus OX=10090 GN=Mcm3ap PE=1 SV=2	9.81	Control_MR_2	Control_MR_2
Q3UNN8	Inactive phospholipase D5 OS=Mus musculus OX=10090 GN=Pld5 PE=2 SV=1	10.97	Control_MR_2	Control_MR_2
Q80YA9	Connector enhancer of kinase suppressor of ras 2 OS=Mus musculus OX=10090 GN=Cnksr2 PE=1 SV=1	44.09	Control_MR_2	Control_MR_2
E0CYV9	Uncharacterized protein C4orf54 homolog OS=Mus musculus OX=10090 PE=1 SV=1	30.31	Control_MR_2	Control_MR_2
P18608	Non-histone chromosomal protein HMG-14 OS=Mus musculus OX=10090 GN=Hmgn1 PE=1 SV=2	41.37	Control_MR_2	Control_MR_2
Q8K087	G-protein coupled receptor 1 OS=Mus musculus OX=10090 GN=Gpr1 PE=2 SV=1	16.19	Control_MR_2	Control_MR_2
Q8BGC0	HIV Tat-specific factor 1 homolog OS=Mus musculus OX=10090 GN=Htatsf1 PE=1 SV=1	17.49	Control_MR_2	Control_MR_2
Q7TQA1	Immunoglobulin superfamily member 1 OS=Mus musculus OX=10090 GN=Igsf1 PE=1 SV=1	9.89	Control_MR_2	Control_MR_2
D7PDD4	Megakaryocyte and platelet inhibitory receptor G6b OS=Mus musculus OX=10090 GN=Mpig6b PE=1 SV=1	69.88	Control_MR_2	Control_MR_2
P35831	Tyrosine-protein phosphatase non-receptor type 12 OS=Mus musculus OX=10090 GN=Ptpn12 PE=1 SV=3	29.84	Control_MR_2	Control_MR_2
Q3UTZ3	Uncharacterized protein C7orf43 homolog OS=Mus musculus OX=10090 PE=1 SV=1	18.19	Control_MR_2	Control_MR_2
P59438	Hermansky-Pudlak syndrome 5 protein homolog OS=Mus musculus OX=10090 GN=Hps5 PE=1 SV=2	14.42	Control_MR_2	Control_MR_2
Q6NZL0	Protein SOGA3 OS=Mus musculus OX=10090 GN=Soga3 PE=1 SV=2	47.81	Control_MR_2	Control_MR_2
Q8C262	Interferon-inducible GTPase 5 OS=Mus musculus OX=10090 GN=Irgc PE=1 SV=1	4.99	Control_MR_2	Control_MR_2
Q9JLM4	Zinc finger MYM-type protein 3 OS=Mus musculus OX=10090 GN=Zmym3 PE=1 SV=1	0.26	Control_MR_2	Control_MR_2
O35674	Disintegrin and metalloproteinase domain-containing protein 19 OS=Mus musculus OX=10090 GN=Adam19 PE=2 SV=2	19.39	Control_MR_2	Control_MR_2
Q6PIC6	Sodium/potassium-transporting ATPase subunit alpha-3 OS=Mus musculus OX=10090 GN=Atp1a3 PE=1 SV=1	10.68	Control_MR_2	Control_MR_2
Q91WT9	Cystathionine beta-synthase OS=Mus musculus OX=10090 GN=Cbs PE=1 SV=3	30.71	Control_MR_2	Control_MR_2
Q9Z2E3	Serine/threonine-protein kinase/endoribonuclease IRE2 OS=Mus musculus OX=10090 GN=Ern2 PE=2 SV=2	11.8	Control_MR_2	Control_MR_2
Q6NZK5	Protein hinderin OS=Mus musculus OX=10090 GN=Kiaa1328 PE=1 SV=2	30.99	Control_MR_2	Control_MR_2
Q5NCC9	E3 ubiquitin-protein ligase TRIM58 OS=Mus musculus OX=10090 GN=Trim58 PE=2 SV=1	30.64	Control_MR_2	Control_MR_2
Q9Z2E1	Methyl-CpG-binding domain protein 2 OS=Mus musculus OX=10090 GN=Mbd2 PE=2 SV=2	85.16	Control_MR_2	Control_MR_2
Q9QZ05	eIF-2-alpha kinase GCN2 OS=Mus musculus OX=10090 GN=Eif2ak4 PE=1 SV=2	20.93	Control_MR_2	Control_MR_2
Q9QZ04	MAGE-like protein 2 OS=Mus musculus OX=10090 GN=Magel2 PE=1 SV=2	27.78	Control_MR_2	Control_MR_2
P35821	Tyrosine-protein phosphatase non-receptor type 1 OS=Mus musculus OX=10090 GN=Ptpn1 PE=1 SV=2	45.24	Control_MR_2	Control_MR_2
P98083	SHC-transforming protein 1 OS=Mus musculus OX=10090 GN=Shc1 PE=1 SV=3	2.55	Control_MR_2	Control_MR_2
Q9CUU3	Synaptonemal complex protein 2 OS=Mus musculus OX=10090 GN=Sycp2 PE=1 SV=2	50	Control_MR_2	Control_MR_2
Q497V5	S1 RNA-binding domain-containing protein 1 OS=Mus musculus OX=10090 GN=Srbd1 PE=2 SV=2	25.75	Control_MR_2	Control_MR_2
P14246	Solute carrier family 2, facilitated glucose transporter member 2 OS=Mus musculus OX=10090 GN=Slc2a2 PE=1 SV=3	10.06	Control_MR_2	Control_MR_2
Q5STT6	Protein FAM71B OS=Mus musculus OX=10090 GN=Fam71b PE=3 SV=3	13.5	Control_MR_2	Control_MR_2
P08884	Granzyme E OS=Mus musculus OX=10090 GN=Gzme PE=1 SV=1	12.79	Control_MR_2	Control_MR_2
P08883	Granzyme F OS=Mus musculus OX=10090 GN=Gzmf PE=1 SV=1	12.79	Control_MR_2	Control_MR_2
Q62392	Pleckstrin homology-like domain family A member 1 OS=Mus musculus OX=10090 GN=Phlda1 PE=1 SV=2	55.19	Control_MR_2	Control_MR_2
Q7TN98	Cytoplasmic polyadenylation element-binding protein 4 OS=Mus musculus OX=10090 GN=Cpeb4 PE=1 SV=1	5.11	Control_MR_2	Control_MR_2
Q9Z2D8	Methyl-CpG-binding domain protein 3 OS=Mus musculus OX=10090 GN=Mbd3 PE=1 SV=1	97.04	Control_MR_2	Control_MR_2
Q11136	Xaa-Pro dipeptidase OS=Mus musculus OX=10090 GN=Pepd PE=1 SV=3	12.04	Control_MR_2	Control_MR_2
Q6NZJ6	Eukaryotic translation initiation factor 4 gamma 1 OS=Mus musculus OX=10090 GN=Eif4g1 PE=1 SV=1	30.25	Control_MR_2	Control_MR_2
A0A087WPF7	Autism susceptibility gene 2 protein homolog OS=Mus musculus OX=10090 GN=Auts2 PE=1 SV=2	20.58	Control_MR_2	Control_MR_2
Q91WS2	NACHT, LRR and PYD domains-containing protein 6 OS=Mus musculus OX=10090 GN=Nlrp6 PE=1 SV=3	40.64	Control_MR_2	Control_MR_2
P06346	H-2 class II histocompatibility antigen, A-F beta chain (Fragment) OS=Mus musculus OX=10090 GN=H2-Ab1 PE=1 SV=1	22.68	Control_MR_2	Control_MR_2
Q8VCX5	Calcium uptake protein 1, mitochondrial OS=Mus musculus OX=10090 GN=Micu1 PE=1 SV=1	22.15	Control_MR_2	Control_MR_2
Q810K9	Glucoside xylosyltransferase 2 OS=Mus musculus OX=10090 GN=Gxylt2 PE=2 SV=1	16.98	Control_MR_2	Control_MR_2
E9Q956	Minichromosome maintenance domain-containing protein 2 OS=Mus musculus OX=10090 GN=Mcmdc2 PE=2 SV=1	15.66	Control_MR_2	Control_MR_2
Q5SQM0	Echinoderm microtubule-associated protein-like 6 OS=Mus musculus OX=10090 GN=Eml6 PE=2 SV=1	31.15	Control_MR_2	Control_MR_2
Q9WV35	C->U-editing enzyme APOBEC-2 OS=Mus musculus OX=10090 GN=Apobec2 PE=1 SV=1	1.04	Control_MR_2	Control_MR_2
Q8BML9	Glutamine--tRNA ligase OS=Mus musculus OX=10090 GN=Qars PE=1 SV=1	1.24	Control_MR_2	Control_MR_2
Q91ZX6	Sentrin-specific protease 2 OS=Mus musculus OX=10090 GN=Senp2 PE=1 SV=2	24.48	Control_MR_2	Control_MR_2
Q8BQ33	Treslin OS=Mus musculus OX=10090 GN=Ticrr PE=1 SV=2	38.65	Control_MR_2	Control_MR_2
P59764	Dedicator of cytokinesis protein 4 OS=Mus musculus OX=10090 GN=Dock4 PE=1 SV=1	18.77	Control_MR_2	Control_MR_2
A2ARA8	Integrin alpha-8 OS=Mus musculus OX=10090 GN=Itga8 PE=1 SV=1	12.22	Control_MR_2	Control_MR_2
Q62018	RNA polymerase-associated protein CTR9 homolog OS=Mus musculus OX=10090 GN=Ctr9 PE=1 SV=2	47.49	Control_MR_2	Control_MR_2
O35643	AP-1 complex subunit beta-1 OS=Mus musculus OX=10090 GN=Ap1b1 PE=1 SV=2	32.56	Control_MR_2	Control_MR_2
Q62376	U1 small nuclear ribonucleoprotein 70 kDa OS=Mus musculus OX=10090 GN=Snrnp70 PE=1 SV=2	38.27	Control_MR_2	Control_MR_2
Q80UV9	Transcription initiation factor TFIID subunit 1 OS=Mus musculus OX=10090 GN=Taf1 PE=1 SV=2	24.22	Control_MR_2	Control_MR_2
A6PWD2	Forkhead-associated domain-containing protein 1 OS=Mus musculus OX=10090 GN=Fhad1 PE=2 SV=1	38.2	Control_MR_2	Control_MR_2
Q8BPQ7	Small G protein signaling modulator 1 OS=Mus musculus OX=10090 GN=Sgsm1 PE=1 SV=2	28.12	Control_MR_2	Control_MR_2
Q8BMK4	Cytoskeleton-associated protein 4 OS=Mus musculus OX=10090 GN=Ckap4 PE=1 SV=2	37.5	Control_MR_2	Control_MR_2
P82343	N-acylglucosamine 2-epimerase OS=Mus musculus OX=10090 GN=Renbp PE=1 SV=3	47.4	Control_MR_2	Control_MR_2
B9EJV3	GREB1-like protein OS=Mus musculus OX=10090 GN=Greb1l PE=2 SV=1	18.01	Control_MR_2	Control_MR_2
Q4KUS2	Protein unc-13 homolog A OS=Mus musculus OX=10090 GN=Unc13a PE=1 SV=3	24.36	Control_MR_2	Control_MR_2
O88703	Potassium/sodium hyperpolarization-activated cyclic nucleotide-gated channel 2 OS=Mus musculus OX=10090 GN=Hcn2 PE=1 SV=1	32.18	Control_MR_2	Control_MR_2
Q8R3C6	Probable RNA-binding protein 19 OS=Mus musculus OX=10090 GN=Rbm19 PE=1 SV=1	87.66	Control_MR_2	Control_MR_2
O88700	Bloom syndrome protein homolog OS=Mus musculus OX=10090 GN=Blm PE=1 SV=1	32.27	Control_MR_2	Control_MR_2
Q8R3C0	Mini-chromosome maintenance complex-binding protein OS=Mus musculus OX=10090 GN=Mcmbp PE=1 SV=1	15.56	Control_MR_2	Control_MR_2
Q5SWW4	Mediator of RNA polymerase II transcription subunit 13 OS=Mus musculus OX=10090 GN=Med13 PE=1 SV=1	11.98	Control_MR_2	Control_MR_2
Q80V62	Fanconi anemia group D2 protein homolog OS=Mus musculus OX=10090 GN=Fancd2 PE=1 SV=2	18.72	Control_MR_2	Control_MR_2
Q80UU1	Ankyrin repeat and zinc finger domain-containing protein 1 OS=Mus musculus OX=10090 GN=Ankzf1 PE=1 SV=2	0.74	Control_MR_2	Control_MR_2
P15656	Fibroblast growth factor 5 OS=Mus musculus OX=10090 GN=Fgf5 PE=2 SV=1	27.82	Control_MR_2	Control_MR_2
Q3V300	Kinesin-like protein KIF22 OS=Mus musculus OX=10090 GN=Kif22 PE=2 SV=2	18.08	Control_MR_2	Control_MR_2
Q9JLH8	Tropomodulin-4 OS=Mus musculus OX=10090 GN=Tmod4 PE=2 SV=1	0.54	Control_MR_2	Control_MR_2
Q9JIB6	Baculoviral IAP repeat-containing protein 1f OS=Mus musculus OX=10090 GN=Naip6 PE=1 SV=2	13.09	Control_MR_2	Control_MR_2
A2ANX9	Zinc finger protein 711 OS=Mus musculus OX=10090 GN=Znf711 PE=3 SV=1	11.1	Control_MR_2	Control_MR_2
Q9JIB3	Baculoviral IAP repeat-containing protein 1g OS=Mus musculus OX=10090 GN=Naip7 PE=4 SV=1	13.09	Control_MR_2	Control_MR_2
Q5SX79	Protein Shroom1 OS=Mus musculus OX=10090 GN=Shroom1 PE=1 SV=2	8.94	Control_MR_2	Control_MR_2
P33609	DNA polymerase alpha catalytic subunit OS=Mus musculus OX=10090 GN=Pola1 PE=1 SV=2	9.68	Control_MR_2	Control_MR_2
E9Q8Q8	Sperm acrosome membrane-associated protein 6 OS=Mus musculus OX=10090 GN=Spaca6 PE=2 SV=1	28.26	Control_MR_2	Control_MR_2
Q0PMG2	MAM domain-containing glycosylphosphatidylinositol anchor protein 1 OS=Mus musculus OX=10090 GN=Mdga1 PE=2 SV=2	28.77	Control_MR_2	Control_MR_2
Q62351	Transferrin receptor protein 1 OS=Mus musculus OX=10090 GN=Tfrc PE=1 SV=1	0.79	Control_MR_2	Control_MR_2
Q7TN58	Transmembrane channel-like protein 8 OS=Mus musculus OX=10090 GN=Tmc8 PE=1 SV=2	23.87	Control_MR_2	Control_MR_2
Q9WV02	RNA-binding motif protein, X chromosome OS=Mus musculus OX=10090 GN=Rbmx PE=1 SV=1	50.52	Control_MR_2	Control_MR_2
Q3UNH4	G protein-regulated inducer of neurite outgrowth 1 OS=Mus musculus OX=10090 GN=Gprin1 PE=1 SV=2	54.61	Control_MR_2	Control_MR_2
Q8K389	CDK5 regulatory subunit-associated protein 2 OS=Mus musculus OX=10090 GN=Cdk5rap2 PE=1 SV=3	11.61	Control_MR_2	Control_MR_2
Q64521	Glycerol-3-phosphate dehydrogenase, mitochondrial OS=Mus musculus OX=10090 GN=Gpd2 PE=1 SV=2	23.54	Control_MR_2	Control_MR_2
A6H5Z3	Exocyst complex component 6B OS=Mus musculus OX=10090 GN=Exoc6b PE=1 SV=1	30.01	Control_MR_2	Control_MR_2
Q9JLG8	Calpain-15 OS=Mus musculus OX=10090 GN=Capn15 PE=1 SV=1	21.02	Control_MR_2	Control_MR_2
Q02111	Protein kinase C theta type OS=Mus musculus OX=10090 GN=Prkcq PE=1 SV=1	3.6	Control_MR_2	Control_MR_2
P09922	Interferon-induced GTP-binding protein Mx1 OS=Mus musculus OX=10090 GN=Mx1 PE=1 SV=1	6.74	Control_MR_2	Control_MR_2
Q3U564	mRNA-decapping enzyme 1B OS=Mus musculus OX=10090 GN=Dcp1b PE=1 SV=1	22.85	Control_MR_2	Control_MR_2
P42932	T-complex protein 1 subunit theta OS=Mus musculus OX=10090 GN=Cct8 PE=1 SV=3	12.36	Control_MR_2	Control_MR_2
Q52KI8	Serine/arginine repetitive matrix protein 1 OS=Mus musculus OX=10090 GN=Srrm1 PE=1 SV=2	42.41	Control_MR_2	Control_MR_2
Q5F267	Tumor protein p53-inducible protein 13 OS=Mus musculus OX=10090 GN=Tp53i13 PE=3 SV=1	11.3	Control_MR_2	Control_MR_2
Q64519	Syndecan-3 OS=Mus musculus OX=10090 GN=Sdc3 PE=1 SV=2	31.04	Control_MR_2	Control_MR_2
Q8K019	Bcl-2-associated transcription factor 1 OS=Mus musculus OX=10090 GN=Bclaf1 PE=1 SV=2	21.11	Control_MR_2	Control_MR_2
Q925H1	Zinc finger transcription factor Trps1 OS=Mus musculus OX=10090 GN=Trps1 PE=1 SV=1	35.81	Control_MR_2	Control_MR_2
A6H5Y3	Methionine synthase OS=Mus musculus OX=10090 GN=Mtr PE=1 SV=1	22.06	Control_MR_2	Control_MR_2
Q8BVZ1	Perilipin-5 OS=Mus musculus OX=10090 GN=Plin5 PE=1 SV=1	19.61	Control_MR_2	Control_MR_2
Q8CDS7	Uncharacterized protein C21orf140 homolog OS=Mus musculus OX=10090 PE=2 SV=1	52.01	Control_MR_2	Control_MR_2
A2AHJ4	Bromodomain and WD repeat-containing protein 3 OS=Mus musculus OX=10090 GN=Brwd3 PE=1 SV=1	26.68	Control_MR_2	Control_MR_2
Q3UGY8	Brefeldin A-inhibited guanine nucleotide-exchange protein 3 OS=Mus musculus OX=10090 GN=Arfgef3 PE=1 SV=1	14.04	Control_MR_2	Control_MR_2
P0DM40	Fer-1-like protein 5 OS=Mus musculus OX=10090 GN=Fer1l5 PE=1 SV=1	26.8	Control_MR_2	Control_MR_2
P0DOY1	DNA (cytosine-5)-methyltransferase 3C OS=Mus musculus OX=10090 GN=Dnmt3c PE=1 SV=1	20.54	Control_MR_2	Control_MR_2
Q6NSW3	A-kinase anchor protein SPHKAP OS=Mus musculus OX=10090 GN=Sphkap PE=1 SV=2	11.54	Control_MR_2	Control_MR_2
Q7TN33	CUGBP Elav-like family member 6 OS=Mus musculus OX=10090 GN=Celf6 PE=2 SV=1	14.03	Control_MR_2	Control_MR_2
Q149T7	Protein phosphatase 1J OS=Mus musculus OX=10090 GN=Ppm1j PE=1 SV=1	54.68	Control_MR_2	Control_MR_2
Q61245	Collagen alpha-1(XI) chain OS=Mus musculus OX=10090 GN=Col11a1 PE=1 SV=2	24.9	Control_MR_2	Control_MR_2
Q8K368	Fanconi anemia group I protein homolog OS=Mus musculus OX=10090 GN=Fanci PE=1 SV=2	2.86	Control_MR_2	Control_MR_2
A6H5X4	PHD finger protein 11 OS=Mus musculus OX=10090 GN=Phf11 PE=2 SV=1	11.98	Control_MR_2	Control_MR_2
Q80V31	Centrosomal protein of 104 kDa OS=Mus musculus OX=10090 GN=Cep104 PE=1 SV=1	14.12	Control_MR_2	Control_MR_2
Q3UU35	Ovostatin homolog OS=Mus musculus OX=10090 GN=Ovos PE=2 SV=2	18.9	Control_MR_2	Control_MR_2
P54285	Voltage-dependent L-type calcium channel subunit beta-3 OS=Mus musculus OX=10090 GN=Cacnb3 PE=1 SV=2	3.44	Control_MR_2	Control_MR_2
B9EJR8	Dynein assembly factor 5, axonemal OS=Mus musculus OX=10090 GN=Dnaaf5 PE=1 SV=1	28.94	Control_MR_2	Control_MR_2
Q9CUN6	E3 ubiquitin-protein ligase SMURF1 OS=Mus musculus OX=10090 GN=Smurf1 PE=1 SV=2	28.5	Control_MR_2	Control_MR_2
Q9D9T8	EF-hand domain-containing protein 1 OS=Mus musculus OX=10090 GN=Efhc1 PE=1 SV=1	35.64	Control_MR_2	Control_MR_2
Q6P5U7	NACHT and WD repeat domain-containing protein 2 OS=Mus musculus OX=10090 GN=Nwd2 PE=1 SV=2	6.42	Control_MR_2	Control_MR_2
Q8VD31	Tapasin-related protein OS=Mus musculus OX=10090 GN=Tapbpl PE=1 SV=2	7.4	Control_MR_2	Control_MR_2
Q402B2	WD repeat-containing protein 93 OS=Mus musculus OX=10090 GN=Wdr93 PE=2 SV=1	17.72	Control_MR_2	Control_MR_2
Q52KG5	Kinesin-like protein KIF26A OS=Mus musculus OX=10090 GN=Kif26a PE=1 SV=2	16.44	Control_MR_2	Control_MR_2
Q3UE31	Uncharacterized protein KIAA0930 homolog OS=Mus musculus OX=10090 PE=1 SV=2	12.08	Control_MR_2	Control_MR_2
Q3UH93	Plexin-D1 OS=Mus musculus OX=10090 GN=Plxnd1 PE=1 SV=1	9.94	Control_MR_2	Control_MR_2
P54279	Mismatch repair endonuclease PMS2 OS=Mus musculus OX=10090 GN=Pms2 PE=2 SV=1	57.97	Control_MR_2	Control_MR_2
Q80Y86	Mitogen-activated protein kinase 15 OS=Mus musculus OX=10090 GN=Mapk15 PE=1 SV=1	13.11	Control_MR_2	Control_MR_2
P63250	G protein-activated inward rectifier potassium channel 1 OS=Mus musculus OX=10090 GN=Kcnj3 PE=1 SV=1	5.93	Control_MR_2	Control_MR_2
Q8BMF5	Glutamate receptor ionotropic, kainate 4 OS=Mus musculus OX=10090 GN=Grik4 PE=2 SV=2	5.38	Control_MR_2	Control_MR_2
Q08093	Calponin-2 OS=Mus musculus OX=10090 GN=Cnn2 PE=1 SV=1	22.26	Control_MR_2	Control_MR_2
P04104	Keratin, type II cytoskeletal 1 OS=Mus musculus OX=10090 GN=Krt1 PE=1 SV=4	5.97	Control_MR_2	Control_MR_2
Q8K352	SAM and SH3 domain-containing protein 3 OS=Mus musculus OX=10090 GN=Sash3 PE=1 SV=2	30.76	Control_MR_2	Control_MR_2
Q8BW93	C5a anaphylatoxin chemotactic receptor 2 OS=Mus musculus OX=10090 GN=C5ar2 PE=1 SV=1	88.18	Control_MR_2	Control_MR_2
Q497N6	CEP295 N-terminal-like protein OS=Mus musculus OX=10090 GN=Cep295nl PE=1 SV=1	21.24	Control_MR_2	Control_MR_2
Q9D9S1	UPF0193 protein EVG1 homolog OS=Mus musculus OX=10090 PE=2 SV=1	64.32	Control_MR_2	Control_MR_2
Q62315	Protein Jumonji OS=Mus musculus OX=10090 GN=Jarid2 PE=1 SV=1	12.39	Control_MR_2	Control_MR_2
E9Q5G3	Kinesin-like protein KIF23 OS=Mus musculus OX=10090 GN=Kif23 PE=1 SV=1	54.64	Control_MR_2	Control_MR_2
Q52KF3	Protein spire homolog 1 OS=Mus musculus OX=10090 GN=Spire1 PE=1 SV=1	2.98	Control_MR_2	Control_MR_2
Q8BG95	Protein phosphatase 1 regulatory subunit 12B OS=Mus musculus OX=10090 GN=Ppp1r12b PE=1 SV=2	13.67	Control_MR_2	Control_MR_2
Q8BFX3	BTB/POZ domain-containing protein KCTD3 OS=Mus musculus OX=10090 GN=Kctd3 PE=1 SV=1	19.39	Control_MR_2	Control_MR_2
Q80Y75	DnaJ homolog subfamily B member 13 OS=Mus musculus OX=10090 GN=Dnajb13 PE=1 SV=1	34.72	Control_MR_2	Control_MR_2
Q7TPV2	E3 ubiquitin-protein ligase DZIP3 OS=Mus musculus OX=10090 GN=Dzip3 PE=1 SV=2	38.66	Control_MR_2	Control_MR_2
O08648	Mitogen-activated protein kinase kinase kinase 4 OS=Mus musculus OX=10090 GN=Map3k4 PE=1 SV=2	32.1	Control_MR_2	Control_MR_2
Q7M6Z4	Kinesin-like protein KIF27 OS=Mus musculus OX=10090 GN=Kif27 PE=1 SV=1	39.77	Control_MR_2	Control_MR_2
Q91ZQ1	Cone cGMP-specific 3',5'-cyclic phosphodiesterase subunit alpha' OS=Mus musculus OX=10090 GN=Pde6c PE=2 SV=1	23.22	Control_MR_2	Control_MR_2
O55196	Enamelin OS=Mus musculus OX=10090 GN=Enam PE=1 SV=1	1.67	Control_MR_2	Control_MR_2
O08644	Ephrin type-B receptor 6 OS=Mus musculus OX=10090 GN=Ephb6 PE=2 SV=4	20.19	Control_MR_2	Control_MR_2
Q8CGV9	Teashirt homolog 3 OS=Mus musculus OX=10090 GN=Tshz3 PE=1 SV=2	17.13	Control_MR_2	Control_MR_2
Q9DCE5	p21-activated protein kinase-interacting protein 1 OS=Mus musculus OX=10090 GN=Pak1ip1 PE=1 SV=2	5	Control_MR_2	Control_MR_2
Q8CH77	Neuron navigator 1 OS=Mus musculus OX=10090 GN=Nav1 PE=1 SV=2	25.03	Control_MR_2	Control_MR_2
Q8CH72	E3 ubiquitin-protein ligase TRIM32 OS=Mus musculus OX=10090 GN=Trim32 PE=1 SV=2	51.27	Control_MR_2	Control_MR_2
Q52KE7	Cyclin-L1 OS=Mus musculus OX=10090 GN=Ccnl1 PE=1 SV=1	15.62	Control_MR_2	Control_MR_2
Q91WJ8	Far upstream element-binding protein 1 OS=Mus musculus OX=10090 GN=Fubp1 PE=1 SV=1	40.44	Control_MR_2	Control_MR_2
Q9QYE6	Golgin subfamily A member 5 OS=Mus musculus OX=10090 GN=Golga5 PE=1 SV=2	9.65	Control_MR_2	Control_MR_2
Q8K337	Type II inositol 1,4,5-trisphosphate 5-phosphatase OS=Mus musculus OX=10090 GN=Inpp5b PE=1 SV=1	19.46	Control_MR_2	Control_MR_2
O08638	Myosin-11 OS=Mus musculus OX=10090 GN=Myh11 PE=1 SV=1	29.41	Control_MR_2	Control_MR_2
Q91WJ0	Fibroblast growth factor receptor substrate 3 OS=Mus musculus OX=10090 GN=Frs3 PE=1 SV=3	11.58	Control_MR_2	Control_MR_2
Q8BW75	Amine oxidase [flavin-containing] B OS=Mus musculus OX=10090 GN=Maob PE=1 SV=4	13.04	Control_MR_2	Control_MR_2
Q4FZF3	Probable ATP-dependent RNA helicase DDX49 OS=Mus musculus OX=10090 GN=Ddx49 PE=2 SV=1	4.75	Control_MR_2	Control_MR_2
Q02788	Collagen alpha-2(VI) chain OS=Mus musculus OX=10090 GN=Col6a2 PE=1 SV=3	17.88	Control_MR_2	Control_MR_2
Q9JLB9	Nectin-3 OS=Mus musculus OX=10090 GN=Nectin3 PE=1 SV=1	11.34	Control_MR_2	Control_MR_2
B5KM66	Synaptonemal complex central element protein 3 OS=Mus musculus OX=10090 GN=Syce3 PE=1 SV=1	147.42	Control_MR_2	Control_MR_2
Q9DCD5	Tight junction-associated protein 1 OS=Mus musculus OX=10090 GN=Tjap1 PE=1 SV=1	23.48	Control_MR_2	Control_MR_2
P70392	Ras-specific guanine nucleotide-releasing factor 2 OS=Mus musculus OX=10090 GN=Rasgrf2 PE=1 SV=2	31.14	Control_MR_2	Control_MR_2
Q3HNM7	Protein inscuteable homolog OS=Mus musculus OX=10090 GN=Insc PE=1 SV=2	53.06	Control_MR_2	Control_MR_2
Q8BG79	CWF19-like protein 2 OS=Mus musculus OX=10090 GN=Cwf19l2 PE=1 SV=1	24.46	Control_MR_2	Control_MR_2
Q80Y56	Rabenosyn-5 OS=Mus musculus OX=10090 GN=Rbsn PE=1 SV=1	6.44	Control_MR_2	Control_MR_2
Q8K327	Chromosome alignment-maintaining phosphoprotein 1 OS=Mus musculus OX=10090 GN=Champ1 PE=1 SV=1	16.88	Control_MR_2	Control_MR_2
Q3TD16	Protein RUBCNL-like OS=Mus musculus OX=10090 GN=Rubcnl PE=1 SV=2	15.53	Control_MR_2	Control_MR_2
Q32M21	Gasdermin-A2 OS=Mus musculus OX=10090 GN=Gsdma2 PE=2 SV=1	95.03	Control_MR_2	Control_MR_2
Q80Y50	Calmodulin-binding transcription activator 2 OS=Mus musculus OX=10090 GN=Camta2 PE=2 SV=1	77.49	Control_MR_2	Control_MR_2
P70388	DNA repair protein RAD50 OS=Mus musculus OX=10090 GN=Rad50 PE=1 SV=1	43.03	Control_MR_2	Control_MR_2
Q8CDN9	Leucine-rich repeat-containing protein 9 OS=Mus musculus OX=10090 GN=Lrrc9 PE=1 SV=2	8.09	Control_MR_2	Control_MR_2
Q8R054	Sushi repeat-containing protein SRPX2 OS=Mus musculus OX=10090 GN=Srpx2 PE=1 SV=2	20.27	Control_MR_2	Control_MR_2
P47791	Glutathione reductase, mitochondrial OS=Mus musculus OX=10090 GN=Gsr PE=1 SV=3	56.17	Control_MR_2	Control_MR_2
Q7TMM8	Mono [ADP-ribose] polymerase PARP16 OS=Mus musculus OX=10090 GN=Parp16 PE=1 SV=2	4.38	Control_MR_2	Control_MR_2
Q562E2	BTB/POZ domain-containing protein KCTD19 OS=Mus musculus OX=10090 GN=Kctd19 PE=1 SV=2	27.55	Control_MR_2	Control_MR_2
P13405	Retinoblastoma-associated protein OS=Mus musculus OX=10090 GN=Rb1 PE=1 SV=2	25.36	Control_MR_2	Control_MR_2
Q7TSY8	Shugoshin 2 OS=Mus musculus OX=10090 GN=Sgo2 PE=1 SV=1	14.2	Control_MR_2	Control_MR_2
Q7TPS5	C2 domain-containing protein 5 OS=Mus musculus OX=10090 GN=C2cd5 PE=1 SV=2	5.68	Control_MR_2	Control_MR_2
Q80UM3	N-alpha-acetyltransferase 15, NatA auxiliary subunit OS=Mus musculus OX=10090 GN=Naa15 PE=1 SV=1	57.34	Control_MR_2	Control_MR_2
Q7TSY6	CUGBP Elav-like family member 4 OS=Mus musculus OX=10090 GN=Celf4 PE=1 SV=2	14.03	Control_MR_2	Control_MR_2
Q8BSN3	Coiled-coil domain-containing protein 151 OS=Mus musculus OX=10090 GN=Ccdc151 PE=2 SV=1	33.12	Control_MR_2	Control_MR_2
Q8BYZ7	Engulfment and cell motility protein 3 OS=Mus musculus OX=10090 GN=Elmo3 PE=1 SV=2	11.39	Control_MR_2	Control_MR_2
Q8CDM8	Protein FAM160B1 OS=Mus musculus OX=10090 GN=Fam160b1 PE=1 SV=2	3.78	Control_MR_2	Control_MR_2
Q8C850	Scavenger receptor class A member 3 OS=Mus musculus OX=10090 GN=Scara3 PE=2 SV=1	50.85	Control_MR_2	Control_MR_2
Q9Z282	Probable G-protein coupled receptor 132 OS=Mus musculus OX=10090 GN=Gpr132 PE=1 SV=1	6.88	Control_MR_2	Control_MR_2
Q8BMA5	Protein NPAT OS=Mus musculus OX=10090 GN=Npat PE=1 SV=2	5.62	Control_MR_2	Control_MR_2
Q99MX1	Ubiquitin carboxyl-terminal hydrolase 26 OS=Mus musculus OX=10090 GN=Usp26 PE=1 SV=2	35.43	Control_MR_2	Control_MR_2
Q0VBV7	Centrosomal protein of 126 kDa OS=Mus musculus OX=10090 GN=Cep126 PE=2 SV=1	24.14	Control_MR_2	Control_MR_2
Q2TV84	Transient receptor potential cation channel subfamily M member 1 OS=Mus musculus OX=10090 GN=Trpm1 PE=2 SV=2	19.26	Control_MR_2	Control_MR_2
Q8BIZ0	Protocadherin-20 OS=Mus musculus OX=10090 GN=Pcdh20 PE=2 SV=3	8.34	Control_MR_2	Control_MR_2
Q7SIG6	Arf-GAP with SH3 domain, ANK repeat and PH domain-containing protein 2 OS=Mus musculus OX=10090 GN=Asap2 PE=1 SV=3	22.58	Control_MR_2	Control_MR_2
Q61543	Golgi apparatus protein 1 OS=Mus musculus OX=10090 GN=Glg1 PE=1 SV=1	45.13	Control_MR_2	Control_MR_2
Q9JHX6	Probable allantoicase OS=Mus musculus OX=10090 GN=Allc PE=1 SV=2	132.66	Control_MR_2	Control_MR_2
A2AHC3	Calmodulin-regulated spectrin-associated protein 1 OS=Mus musculus OX=10090 GN=Camsap1 PE=1 SV=1	20.02	Control_MR_2	Control_MR_2
P22726	Protein Wnt-5b OS=Mus musculus OX=10090 GN=Wnt5b PE=1 SV=2	67.09	Control_MR_2	Control_MR_2
Q99KU6	Bombesin receptor-activated protein C6orf89 homolog OS=Mus musculus OX=10090 PE=2 SV=2	6.46	Control_MR_2	Control_MR_2
Q9R0N9	Synaptotagmin-9 OS=Mus musculus OX=10090 GN=Syt9 PE=1 SV=2	53.54	Control_MR_2	Control_MR_2
Q9WUF3	CASP8-associated protein 2 OS=Mus musculus OX=10090 GN=Casp8ap2 PE=1 SV=2	36.17	Control_MR_2	Control_MR_2
A4Q9F3	Protein polyglycylase TTLL10 OS=Mus musculus OX=10090 GN=Ttll10 PE=1 SV=1	16.99	Control_MR_2	Control_MR_2
Q7TPQ3	E3 ubiquitin-protein ligase SHPRH OS=Mus musculus OX=10090 GN=Shprh PE=1 SV=1	49.32	Control_MR_2	Control_MR_2
Q8C1F5	Tetratricopeptide repeat protein 16 OS=Mus musculus OX=10090 GN=Ttc16 PE=2 SV=1	11.62	Control_MR_2	Control_MR_2
Q7M764	Ubiquitin carboxyl-terminal hydrolase 17-like protein E OS=Mus musculus OX=10090 GN=Usp17le PE=3 SV=2	4.41	Control_MR_2	Control_MR_2
Q80UK0	SEC14 domain and spectrin repeat-containing protein 1 OS=Mus musculus OX=10090 GN=Sestd1 PE=1 SV=1	9.52	Control_MR_2	Control_MR_2
Q80XQ2	TBC1 domain family member 5 OS=Mus musculus OX=10090 GN=Tbc1d5 PE=1 SV=2	55.9	Control_MR_2	Control_MR_2
Q8BIY1	G patch domain-containing protein 3 OS=Mus musculus OX=10090 GN=Gpatch3 PE=2 SV=1	27.74	Control_MR_2	Control_MR_2
A4Q9F0	Tubulin polyglutamylase TTLL7 OS=Mus musculus OX=10090 GN=Ttll7 PE=1 SV=1	32.31	Control_MR_2	Control_MR_2
Q8C7R4	Ubiquitin-like modifier-activating enzyme 6 OS=Mus musculus OX=10090 GN=Uba6 PE=1 SV=1	27.71	Control_MR_2	Control_MR_2
P23804	E3 ubiquitin-protein ligase Mdm2 OS=Mus musculus OX=10090 GN=Mdm2 PE=1 SV=3	51.54	Control_MR_2	Control_MR_2
Q3TYX8	RUN and FYVE domain-containing protein 4 OS=Mus musculus OX=10090 GN=Rufy4 PE=2 SV=3	68.19	Control_MR_2	Control_MR_2
Q8CH25	SAFB-like transcription modulator OS=Mus musculus OX=10090 GN=Sltm PE=1 SV=1	74.18	Control_MR_2	Control_MR_2
E9PZM4	Chromodomain-helicase-DNA-binding protein 2 OS=Mus musculus OX=10090 GN=Chd2 PE=1 SV=1	48.37	Control_MR_2	Control_MR_2
A6H619	PHD and RING finger domain-containing protein 1 OS=Mus musculus OX=10090 GN=Phrf1 PE=1 SV=2	17.59	Control_MR_2	Control_MR_2
Q8BFR5	Elongation factor Tu, mitochondrial OS=Mus musculus OX=10090 GN=Tufm PE=1 SV=1	60.41	Control_MR_2	Control_MR_2
Q8BFR4	N-acetylglucosamine-6-sulfatase OS=Mus musculus OX=10090 GN=Gns PE=1 SV=1	49.61	Control_MR_2	Control_MR_2
Q91WE3	Ribonuclease P protein subunit p25 OS=Mus musculus OX=10090 GN=Rpp25 PE=2 SV=1	65.07	Control_MR_2	Control_MR_2
Q61881	DNA replication licensing factor MCM7 OS=Mus musculus OX=10090 GN=Mcm7 PE=1 SV=1	3.26	Control_MR_2	Control_MR_2
Q6DFV6	Fibronectin type III domain containing protein 3C1 OS=Mus musculus OX=10090 GN=Fndc3c1 PE=2 SV=1	15.84	Control_MR_2	Control_MR_2
Q3TJ91	Lethal(2) giant larvae protein homolog 2 OS=Mus musculus OX=10090 GN=Llgl2 PE=1 SV=2	24.2	Control_MR_2	Control_MR_2
Q8BZ81	Leucine-rich repeat transmembrane neuronal protein 3 OS=Mus musculus OX=10090 GN=Lrrtm3 PE=2 SV=2	3.23	Control_MR_2	Control_MR_2
Q8BYW1	Rho GTPase-activating protein 25 OS=Mus musculus OX=10090 GN=Arhgap25 PE=1 SV=2	24.41	Control_MR_2	Control_MR_2
Q3TZ89	Protein transport protein Sec31B OS=Mus musculus OX=10090 GN=Sec31b PE=1 SV=2	22.3	Control_MR_2	Control_MR_2
Q8CH18	Cell division cycle and apoptosis regulator protein 1 OS=Mus musculus OX=10090 GN=Ccar1 PE=1 SV=1	9.66	Control_MR_2	Control_MR_2
Q6DFV1	Condensin-2 complex subunit G2 OS=Mus musculus OX=10090 GN=Ncapg2 PE=1 SV=2	16.2	Control_MR_2	Control_MR_2
P70340	Mothers against decapentaplegic homolog 1 OS=Mus musculus OX=10090 GN=Smad1 PE=1 SV=2	11.79	Control_MR_2	Control_MR_2
Q3U821	WD repeat-containing protein 75 OS=Mus musculus OX=10090 GN=Wdr75 PE=1 SV=1	45.66	Control_MR_2	Control_MR_2
Q3UK78	Polycomb group RING finger protein 5 OS=Mus musculus OX=10090 GN=Pcgf5 PE=1 SV=1	32.25	Control_MR_2	Control_MR_2
P47750	Thyrotropin receptor OS=Mus musculus OX=10090 GN=Tshr PE=1 SV=2	16.53	Control_MR_2	Control_MR_2
Q9R0L6	Pericentriolar material 1 protein OS=Mus musculus OX=10090 GN=Pcm1 PE=1 SV=2	10.34	Control_MR_2	Control_MR_2
Q8BG26	RUN and SH3 domain-containing protein 1 OS=Mus musculus OX=10090 GN=Rusc1 PE=1 SV=2	90.06	Control_MR_2	Control_MR_2
Q3UJV1	Coiled-coil domain-containing protein 61 OS=Mus musculus OX=10090 GN=Ccdc61 PE=1 SV=1	11.5	Control_MR_2	Control_MR_2
E1U8D0	Protein SOGA1 OS=Mus musculus OX=10090 GN=Soga1 PE=1 SV=3	41.91	Control_MR_2	Control_MR_2
O55123	Stromelysin-2 OS=Mus musculus OX=10090 GN=Mmp10 PE=2 SV=1	15.41	Control_MR_2	Control_MR_2
P70336	Rho-associated protein kinase 2 OS=Mus musculus OX=10090 GN=Rock2 PE=1 SV=1	21.34	Control_MR_2	Control_MR_2
P70335	Rho-associated protein kinase 1 OS=Mus musculus OX=10090 GN=Rock1 PE=1 SV=1	18.9	Control_MR_2	Control_MR_2
Q8CH09	SURP and G-patch domain-containing protein 2 OS=Mus musculus OX=10090 GN=Sugp2 PE=1 SV=2	20.88	Control_MR_2	Control_MR_2
Q9EPU4	Cleavage and polyadenylation specificity factor subunit 1 OS=Mus musculus OX=10090 GN=Cpsf1 PE=1 SV=1	40.16	Control_MR_2	Control_MR_2
P70694	Estradiol 17 beta-dehydrogenase 5 OS=Mus musculus OX=10090 GN=Akr1c6 PE=1 SV=1	15.06	Control_MR_2	Control_MR_2
D3YXS5	Kinesin-like protein KIF28P OS=Mus musculus OX=10090 GN=Kif28p PE=3 SV=1	13.26	Control_MR_2	Control_MR_2
Q8R361	Rab11 family-interacting protein 5 OS=Mus musculus OX=10090 GN=Rab11fip5 PE=1 SV=2	14.25	Control_MR_2	Control_MR_2
Q3UJU9	Regulator of microtubule dynamics protein 3 OS=Mus musculus OX=10090 GN=Rmdn3 PE=1 SV=2	14.51	Control_MR_2	Control_MR_2
Q6PHQ8	N-alpha-acetyltransferase 35, NatC auxiliary subunit OS=Mus musculus OX=10090 GN=Naa35 PE=1 SV=1	14.42	Control_MR_2	Control_MR_2
Q9Z1S3	RAS guanyl-releasing protein 1 OS=Mus musculus OX=10090 GN=Rasgrp1 PE=1 SV=1	38.13	Control_MR_2	Control_MR_2
Q00547	Hyaluronan mediated motility receptor OS=Mus musculus OX=10090 GN=Hmmr PE=1 SV=4	56.9	Control_MR_2	Control_MR_2
C8YR32	Lipoxygenase homology domain-containing protein 1 OS=Mus musculus OX=10090 GN=Loxhd1 PE=2 SV=1	30.81	Control_MR_2	Control_MR_2
Q80XN0	D-beta-hydroxybutyrate dehydrogenase, mitochondrial OS=Mus musculus OX=10090 GN=Bdh1 PE=1 SV=2	26.54	Control_MR_2	Control_MR_2
Q9JI59	Junctional adhesion molecule B OS=Mus musculus OX=10090 GN=Jam2 PE=1 SV=1	15.81	Control_MR_2	Control_MR_2
Q8C804	Spindle and centriole-associated protein 1 OS=Mus musculus OX=10090 GN=Spice1 PE=1 SV=2	45.47	Control_MR_2	Control_MR_2
Q9JI57	General transcription factor II-I repeat domain-containing protein 1 OS=Mus musculus OX=10090 GN=Gtf2ird1 PE=2 SV=2	9.9	Control_MR_2	Control_MR_2
Q9CXJ4	ATP-binding cassette sub-family B member 8, mitochondrial OS=Mus musculus OX=10090 GN=Abcb8 PE=1 SV=1	37.09	Control_MR_2	Control_MR_2
P17183	Gamma-enolase OS=Mus musculus OX=10090 GN=Eno2 PE=1 SV=2	12.39	Control_MR_2	Control_MR_2
E9Q286	Little elongation complex subunit 1 OS=Mus musculus OX=10090 GN=Ice1 PE=1 SV=1	19.39	Control_MR_2	Control_MR_2
P47738	Aldehyde dehydrogenase, mitochondrial OS=Mus musculus OX=10090 GN=Aldh2 PE=1 SV=1	13.51	Control_MR_2	Control_MR_2
Q3TYU2	Probable cation-transporting ATPase 13A5 OS=Mus musculus OX=10090 GN=Atp13a5 PE=2 SV=2	7.43	Control_MR_2	Control_MR_2
Q66LM6	Protein FAM170A OS=Mus musculus OX=10090 GN=Fam170a PE=1 SV=1	17.63	Control_MR_2	Control_MR_2
Q7TPM9	Myotubularin-related protein 10 OS=Mus musculus OX=10090 GN=Mtmr10 PE=1 SV=2	15.69	Control_MR_2	Control_MR_2
Q8BG07	Phospholipase D4 OS=Mus musculus OX=10090 GN=Pld4 PE=1 SV=1	30.43	Control_MR_2	Control_MR_2
P13705	DNA mismatch repair protein Msh3 OS=Mus musculus OX=10090 GN=Msh3 PE=2 SV=3	19.14	Control_MR_2	Control_MR_2
Q80UG2	Plexin-A4 OS=Mus musculus OX=10090 GN=Plxna4 PE=1 SV=3	14.4	Control_MR_2	Control_MR_2
Q7TPM1	Protein PRRC2B OS=Mus musculus OX=10090 GN=Prrc2b PE=1 SV=1	26.57	Control_MR_2	Control_MR_2
Q08351	Thrombopoietin receptor OS=Mus musculus OX=10090 GN=Mpl PE=2 SV=2	29.61	Control_MR_2	Control_MR_2
Q3UWM4	Lysine-specific demethylase 7A OS=Mus musculus OX=10090 GN=Kdm7a PE=2 SV=2	12.08	Control_MR_2	Control_MR_2
Q8C1B1	Calmodulin-regulated spectrin-associated protein 2 OS=Mus musculus OX=10090 GN=Camsap2 PE=1 SV=3	36.13	Control_MR_2	Control_MR_2
Q60769	Tumor necrosis factor alpha-induced protein 3 OS=Mus musculus OX=10090 GN=Tnfaip3 PE=1 SV=2	4.62	Control_MR_2	Control_MR_2
Q9JKY5	Huntingtin-interacting protein 1-related protein OS=Mus musculus OX=10090 GN=Hip1r PE=1 SV=2	34.02	Control_MR_2	Control_MR_2
Q60767	Lymphocyte antigen 75 OS=Mus musculus OX=10090 GN=Ly75 PE=1 SV=2	12.69	Control_MR_2	Control_MR_2
Q60764	Probable E3 ubiquitin-protein ligase makorin-3 OS=Mus musculus OX=10090 GN=Mkrn3 PE=2 SV=2	38.49	Control_MR_2	Control_MR_2
D3YY23	LON peptidase N-terminal domain and RING finger protein 1 OS=Mus musculus OX=10090 GN=Lonrf1 PE=1 SV=2	9.24	Control_MR_2	Control_MR_2
Q8CGM1	Adhesion G protein-coupled receptor B2 OS=Mus musculus OX=10090 GN=Adgrb2 PE=1 SV=2	39.79	Control_MR_2	Control_MR_2
A2AQP0	Myosin-7B OS=Mus musculus OX=10090 GN=Myh7b PE=3 SV=1	51.29	Control_MR_2	Control_MR_2
Q9Z1Q9	Valine--tRNA ligase OS=Mus musculus OX=10090 GN=Vars PE=1 SV=1	46.02	Control_MR_2	Control_MR_2
Q924Z6	Exportin-6 OS=Mus musculus OX=10090 GN=Xpo6 PE=1 SV=2	20.79	Control_MR_2	Control_MR_2
P35123	Ubiquitin carboxyl-terminal hydrolase 4 OS=Mus musculus OX=10090 GN=Usp4 PE=1 SV=3	8.06	Control_MR_2	Control_MR_2
Q80XL6	Acyl-CoA dehydrogenase family member 11 OS=Mus musculus OX=10090 GN=Acad11 PE=1 SV=2	18.29	Control_MR_2	Control_MR_2
Q61846	Maternal embryonic leucine zipper kinase OS=Mus musculus OX=10090 GN=Melk PE=1 SV=2	8.91	Control_MR_2	Control_MR_2
Q8BZ47	Zinc finger protein 609 OS=Mus musculus OX=10090 GN=Znf609 PE=1 SV=2	52.31	Control_MR_2	Control_MR_2
Q9CXH7	Shugoshin 1 OS=Mus musculus OX=10090 GN=Sgo1 PE=2 SV=1	41.78	Control_MR_2	Control_MR_2
Q9JI39	ATP-binding cassette sub-family B member 10, mitochondrial OS=Mus musculus OX=10090 GN=Abcb10 PE=1 SV=1	11.91	Control_MR_2	Control_MR_2
Q9JI38	tRNA pseudouridine(38/39) synthase OS=Mus musculus OX=10090 GN=Pus3 PE=1 SV=2	26.82	Control_MR_2	Control_MR_2
Q9EPR5	VPS10 domain-containing receptor SorCS2 OS=Mus musculus OX=10090 GN=Sorcs2 PE=1 SV=2	7.98	Control_MR_2	Control_MR_2
O88393	Transforming growth factor beta receptor type 3 OS=Mus musculus OX=10090 GN=Tgfbr3 PE=1 SV=1	24.64	Control_MR_2	Control_MR_2
Q7TT28	RNA exonuclease 1 homolog OS=Mus musculus OX=10090 GN=Rexo1 PE=1 SV=1	32.96	Control_MR_2	Control_MR_2
P43006	Excitatory amino acid transporter 2 OS=Mus musculus OX=10090 GN=Slc1a2 PE=1 SV=1	10.1	Control_MR_2	Control_MR_2
O89114	DnaJ homolog subfamily B member 5 OS=Mus musculus OX=10090 GN=Dnajb5 PE=2 SV=1	54.57	Control_MR_2	Control_MR_2
C3VPR6	Protein NLRC5 OS=Mus musculus OX=10090 GN=Nlrc5 PE=1 SV=2	26.98	Control_MR_2	Control_MR_2
Q6PHN1	Coiled-coil domain-containing protein 57 OS=Mus musculus OX=10090 GN=Ccdc57 PE=1 SV=1	35.29	Control_MR_2	Control_MR_2
Q7TT23	Uncharacterized protein C20orf194 homolog OS=Mus musculus OX=10090 PE=1 SV=2	14.82	Control_MR_2	Control_MR_2
Q8VCE9	Pleckstrin homology domain-containing family H member 3 OS=Mus musculus OX=10090 GN=Plekhh3 PE=2 SV=1	3.35	Control_MR_2	Control_MR_2
Q8K2H1	Periphilin-1 OS=Mus musculus OX=10090 GN=Pphln1 PE=1 SV=1	26.31	Control_MR_2	Control_MR_2
Q8BZ36	RAD50-interacting protein 1 OS=Mus musculus OX=10090 GN=Rint1 PE=1 SV=2	4.01	Control_MR_2	Control_MR_2
Q6V4S5	Protein sidekick-2 OS=Mus musculus OX=10090 GN=Sdk2 PE=1 SV=1	4.85	Control_MR_2	Control_MR_2
Q9EPQ8	Transcription factor 20 OS=Mus musculus OX=10090 GN=Tcf20 PE=1 SV=3	17.35	Control_MR_2	Control_MR_2
P17156	Heat shock-related 70 kDa protein 2 OS=Mus musculus OX=10090 GN=Hspa2 PE=1 SV=2	25.2	Control_MR_2	Control_MR_2
Q9D6A1	Unconventional myosin-Ih OS=Mus musculus OX=10090 GN=Myo1h PE=2 SV=2	28.7	Control_MR_2	Control_MR_2
D3Z3C6	AN1-type zinc finger protein 4 OS=Mus musculus OX=10090 GN=Zfand4 PE=4 SV=2	47.04	Control_MR_2	Control_MR_2
Q8BYR2	Serine/threonine-protein kinase LATS1 OS=Mus musculus OX=10090 GN=Lats1 PE=1 SV=3	16.43	Control_MR_2	Control_MR_2
P28667	MARCKS-related protein OS=Mus musculus OX=10090 GN=Marcksl1 PE=1 SV=2	85.25	Control_MR_2	Control_MR_2
P28665	Murinoglobulin-1 OS=Mus musculus OX=10090 GN=Mug1 PE=1 SV=3	5.24	Control_MR_2	Control_MR_2
Q8CGK7	Guanine nucleotide-binding protein G(olf) subunit alpha OS=Mus musculus OX=10090 GN=Gnal PE=1 SV=1	126.68	Control_MR_2	Control_MR_2
Q9JI20	Double-stranded RNA-specific editase B2 OS=Mus musculus OX=10090 GN=Adarb2 PE=2 SV=2	12.76	Control_MR_2	Control_MR_2
Q922B9	Sperm-specific antigen 2 homolog OS=Mus musculus OX=10090 GN=Ssfa2 PE=1 SV=3	15.28	Control_MR_2	Control_MR_2
Q6P2B1	Transportin-3 OS=Mus musculus OX=10090 GN=Tnpo3 PE=1 SV=1	11.71	Control_MR_2	Control_MR_2
Q6P5H2	Nestin OS=Mus musculus OX=10090 GN=Nes PE=1 SV=1	16.6	Control_MR_2	Control_MR_2
Q9ET80	Junctophilin-1 OS=Mus musculus OX=10090 GN=Jph1 PE=1 SV=1	65.63	Control_MR_2	Control_MR_2
Q921R4	DnaJ homolog subfamily C member 14 OS=Mus musculus OX=10090 GN=Dnajc14 PE=2 SV=2	37.57	Control_MR_2	Control_MR_2
Q924X2	Carnitine O-palmitoyltransferase 1, muscle isoform OS=Mus musculus OX=10090 GN=Cpt1b PE=1 SV=1	26.52	Control_MR_2	Control_MR_2
Q149F5	Transmembrane protein 71 OS=Mus musculus OX=10090 GN=Tmem71 PE=2 SV=1	17.32	Control_MR_2	Control_MR_2
Q0VF58	Collagen alpha-1(XIX) chain OS=Mus musculus OX=10090 GN=Col19a1 PE=2 SV=2	7.57	Control_MR_2	Control_MR_2
Q9D2Y5	Sorting nexin-20 OS=Mus musculus OX=10090 GN=Snx20 PE=1 SV=2	35.05	Control_MR_2	Control_MR_2
Q0VET5	Lamin tail domain-containing protein 2 OS=Mus musculus OX=10090 GN=Lmntd2 PE=2 SV=1	8.1	Control_MR_2	Control_MR_2
O88379	Bromodomain adjacent to zinc finger domain protein 1A OS=Mus musculus OX=10090 GN=Baz1a PE=1 SV=3	28.23	Control_MR_2	Control_MR_2
Q9JI19	Acidic fibroblast growth factor intracellular-binding protein OS=Mus musculus OX=10090 GN=Fibp PE=1 SV=1	51.38	Control_MR_2	Control_MR_2
Q8JZY4	Mitochondrial ribonuclease P catalytic subunit OS=Mus musculus OX=10090 GN=Kiaa0391 PE=2 SV=1	26.17	Control_MR_2	Control_MR_2
Q8BZ21	Histone acetyltransferase KAT6A OS=Mus musculus OX=10090 GN=Kat6a PE=1 SV=2	31.36	Control_MR_2	Control_MR_2
Q8JZY2	COMM domain-containing protein 10 OS=Mus musculus OX=10090 GN=Commd10 PE=1 SV=1	37.51	Control_MR_2	Control_MR_2
Q3TYQ9	Aldehyde oxidase 4 OS=Mus musculus OX=10090 GN=Aox4 PE=1 SV=1	22.08	Control_MR_2	Control_MR_2
Q8BZ20	Poly [ADP-ribose] polymerase 12 OS=Mus musculus OX=10090 GN=Parp12 PE=1 SV=3	27.16	Control_MR_2	Control_MR_2
P17141	Zinc finger protein 37 OS=Mus musculus OX=10090 GN=Zfp37 PE=2 SV=4	36.31	Control_MR_2	Control_MR_2
P53776	LIM/homeobox protein Lhx4 OS=Mus musculus OX=10090 GN=Lhx4 PE=1 SV=4	46.81	Control_MR_2	Control_MR_2
Q9JKV2	Serine/threonine-protein kinase ICK OS=Mus musculus OX=10090 GN=Ick PE=1 SV=2	27.59	Control_MR_2	Control_MR_2
Q8R313	Exocyst complex component 6 OS=Mus musculus OX=10090 GN=Exoc6 PE=1 SV=2	10.62	Control_MR_2	Control_MR_2
P97504	Cytoplasmic tyrosine-protein kinase BMX OS=Mus musculus OX=10090 GN=Bmx PE=2 SV=1	21.73	Control_MR_2	Control_MR_2
Q8R310	Transmembrane and coiled-coil domain protein 3 OS=Mus musculus OX=10090 GN=Tmcc3 PE=1 SV=2	26.58	Control_MR_2	Control_MR_2
P16054	Protein kinase C epsilon type OS=Mus musculus OX=10090 GN=Prkce PE=1 SV=1	60.61	Control_MR_2	Control_MR_2
Q9Z1N9	Protein unc-13 homolog B OS=Mus musculus OX=10090 GN=Unc13b PE=1 SV=2	6.94	Control_MR_2	Control_MR_2
Q924W6	Tripartite motif-containing protein 66 OS=Mus musculus OX=10090 GN=Trim66 PE=1 SV=3	36.1	Control_MR_2	Control_MR_2
Q8BM89	Arylsulfatase J OS=Mus musculus OX=10090 GN=Arsj PE=2 SV=1	44.36	Control_MR_2	Control_MR_2
Q9QUR8	Semaphorin-7A OS=Mus musculus OX=10090 GN=Sema7a PE=1 SV=1	39.5	Control_MR_2	Control_MR_2
Q9QY96	Extracellular calcium-sensing receptor OS=Mus musculus OX=10090 GN=Casr PE=1 SV=2	14.72	Control_MR_2	Control_MR_2
Q0MW30	E3 ubiquitin-protein ligase NEURL1B OS=Mus musculus OX=10090 GN=Neurl1b PE=1 SV=1	9.98	Control_MR_2	Control_MR_2
Q61818	Retinoic acid-induced protein 1 OS=Mus musculus OX=10090 GN=Rai1 PE=1 SV=3	15.8	Control_MR_2	Control_MR_2
Q80XI3	Eukaryotic translation initiation factor 4 gamma 3 OS=Mus musculus OX=10090 GN=Eif4g3 PE=1 SV=2	26.9	Control_MR_2	Control_MR_2
O70481	E3 ubiquitin-protein ligase UBR1 OS=Mus musculus OX=10090 GN=Ubr1 PE=1 SV=2	14.53	Control_MR_2	Control_MR_2
Q8VCC9	Spondin-1 OS=Mus musculus OX=10090 GN=Spon1 PE=1 SV=1	32.06	Control_MR_2	Control_MR_2
P28649	Aromatase OS=Mus musculus OX=10090 GN=Cyp19a1 PE=2 SV=1	46.53	Control_MR_2	Control_MR_2
Q8JZX4	Splicing factor 45 OS=Mus musculus OX=10090 GN=Rbm17 PE=1 SV=1	4.3	Control_MR_2	Control_MR_2
Q9ESU6	Bromodomain-containing protein 4 OS=Mus musculus OX=10090 GN=Brd4 PE=1 SV=2	6.18	Control_MR_2	Control_MR_2
Q9CXE0	FRAS1-related extracellular matrix protein 1 OS=Mus musculus OX=10090 GN=Frem1 PE=1 SV=1	38.52	Control_MR_2	Control_MR_2
P97857	A disintegrin and metalloproteinase with thrombospondin motifs 1 OS=Mus musculus OX=10090 GN=Adamts1 PE=1 SV=4	4.33	Control_MR_2	Control_MR_2
Q5SPW0	Vacuolar protein sorting-associated protein 54 OS=Mus musculus OX=10090 GN=Vps54 PE=1 SV=1	49.01	Control_MR_2	Control_MR_2
P55937	Golgin subfamily A member 3 OS=Mus musculus OX=10090 GN=Golga3 PE=1 SV=3	41.61	Control_MR_2	Control_MR_2
Q6PEE2	CBP80/20-dependent translation initiation factor OS=Mus musculus OX=10090 GN=Ctif PE=1 SV=2	46.33	Control_MR_2	Control_MR_2
Q61879	Myosin-10 OS=Mus musculus OX=10090 GN=Myh10 PE=1 SV=2	34.64	Control_MR_2	Control_MR_2
P35441	Thrombospondin-1 OS=Mus musculus OX=10090 GN=Thbs1 PE=1 SV=1	8.33	Control_MR_2	Control_MR_2
Q8BZ09	Mitochondrial 2-oxodicarboxylate carrier OS=Mus musculus OX=10090 GN=Slc25a21 PE=1 SV=1	79.21	Control_MR_2	Control_MR_2
Q6WKZ8	E3 ubiquitin-protein ligase UBR2 OS=Mus musculus OX=10090 GN=Ubr2 PE=1 SV=2	12.41	Control_MR_2	Control_MR_2
Q684R7	FRAS1-related extracellular matrix protein 1 OS=Mus musculus OX=10090 GN=Frem1 PE=1 SV=1	21.42	Control_MR_2	Control_MR_2
Q6P5E4	UDP-glucose:glycoprotein glucosyltransferase 1 OS=Mus musculus OX=10090 GN=Uggt1 PE=1 SV=4	23.59	Control_MR_2	Control_MR_2
Q9DBV3	Probable ATP-dependent RNA helicase DHX34 OS=Mus musculus OX=10090 GN=Dhx34 PE=1 SV=2	18.55	Control_MR_2	Control_MR_2
Q9EST1	Gasdermin-A OS=Mus musculus OX=10090 GN=Gsdma PE=2 SV=1	19.73	Control_MR_2	Control_MR_2
P33267	Cytochrome P450 2F2 OS=Mus musculus OX=10090 GN=Cyp2f2 PE=1 SV=1	6.34	Control_MR_2	Control_MR_2
O70468	Myosin-binding protein C, cardiac-type OS=Mus musculus OX=10090 GN=Mybpc3 PE=1 SV=1	31.61	Control_MR_2	Control_MR_2
Q9D952	Envoplakin OS=Mus musculus OX=10090 GN=Evpl PE=1 SV=3	39.4	Control_MR_2	Control_MR_2
Q9CQV8	14-3-3 protein beta/alpha OS=Mus musculus OX=10090 GN=Ywhab PE=1 SV=3	7.06	Control_MR_2	Control_MR_2
Q9CR76	Transmembrane protein 186 OS=Mus musculus OX=10090 GN=Tmem186 PE=1 SV=2	28.68	Control_MR_2	Control_MR_2
Q91ZB0	Alpha-protein kinase 2 OS=Mus musculus OX=10090 GN=Alpk2 PE=2 SV=3	7.45	Control_MR_2	Control_MR_2
A2A891	Calmodulin-binding transcription activator 1 OS=Mus musculus OX=10090 GN=Camta1 PE=2 SV=1	7.15	Control_MR_2	Control_MR_2
B9EJA2	Cortactin-binding protein 2 OS=Mus musculus OX=10090 GN=Cttnbp2 PE=1 SV=2	4.11	Control_MR_2	Control_MR_2
Q9DBU6	Serine/Arginine-related protein 53 OS=Mus musculus OX=10090 GN=Rsrc1 PE=1 SV=1	43.68	Control_MR_2	Control_MR_2
O88342	WD repeat-containing protein 1 OS=Mus musculus OX=10090 GN=Wdr1 PE=1 SV=3	19.46	Control_MR_2	Control_MR_2
Q6P5D4	Centrosomal protein of 135 kDa OS=Mus musculus OX=10090 GN=Cep135 PE=1 SV=1	82.5	Control_MR_2	Control_MR_2
Q6P5D3	Putative ATP-dependent RNA helicase DHX57 OS=Mus musculus OX=10090 GN=Dhx57 PE=1 SV=2	17.34	Control_MR_2	Control_MR_2
Q60700	Mitogen-activated protein kinase kinase kinase 12 OS=Mus musculus OX=10090 GN=Map3k12 PE=1 SV=1	50.26	Control_MR_2	Control_MR_2
Q9Z1K6	E3 ubiquitin-protein ligase ARIH2 OS=Mus musculus OX=10090 GN=Arih2 PE=1 SV=1	36.45	Control_MR_2	Control_MR_2
P46938	Transcriptional coactivator YAP1 OS=Mus musculus OX=10090 GN=Yap1 PE=1 SV=2	55.74	Control_MR_2	Control_MR_2
Q8K2C8	Glycerol-3-phosphate acyltransferase 4 OS=Mus musculus OX=10090 GN=Gpat4 PE=1 SV=1	4.64	Control_MR_2	Control_MR_2
Q8C4A5	Putative Polycomb group protein ASXL3 OS=Mus musculus OX=10090 GN=Asxl3 PE=2 SV=3	17.43	Control_MR_2	Control_MR_2
Q9CXB8	Alpha-protein kinase 1 OS=Mus musculus OX=10090 GN=Alpk1 PE=2 SV=2	91.87	Control_MR_2	Control_MR_2
Q8BYM7	Radial spoke head protein 4 homolog A OS=Mus musculus OX=10090 GN=Rsph4a PE=1 SV=2	17.04	Control_MR_2	Control_MR_2
P59384	A disintegrin and metalloproteinase with thrombospondin motifs 15 OS=Mus musculus OX=10090 GN=Adamts15 PE=2 SV=2	24.61	Control_MR_2	Control_MR_2
Q9EPL8	Importin-7 OS=Mus musculus OX=10090 GN=Ipo7 PE=1 SV=2	10.32	Control_MR_2	Control_MR_2
Q9D9B4	Leucine-rich melanocyte differentiation-associated protein OS=Mus musculus OX=10090 GN=Lrmda PE=1 SV=1	27.96	Control_MR_2	Control_MR_2
O88696	ATP-dependent Clp protease proteolytic subunit, mitochondrial OS=Mus musculus OX=10090 GN=Clpp PE=1 SV=1	38.97	Control_MR_2	Control_MR_2
Q9JL35	High mobility group nucleosome-binding domain-containing protein 5 OS=Mus musculus OX=10090 GN=Hmgn5 PE=1 SV=2	121.5	Control_MR_2	Control_MR_2
Q9DBT3	Coiled-coil domain-containing protein 97 OS=Mus musculus OX=10090 GN=Ccdc97 PE=1 SV=1	24.03	Control_MR_2	Control_MR_2
Q6VGS5	Protein Daple OS=Mus musculus OX=10090 GN=Ccdc88c PE=1 SV=1	15.19	Control_MR_2	Control_MR_2
P16014	Secretogranin-1 OS=Mus musculus OX=10090 GN=Chgb PE=1 SV=2	42.41	Control_MR_2	Control_MR_2
P61622	Integrin alpha-11 OS=Mus musculus OX=10090 GN=Itga11 PE=1 SV=1	28	Control_MR_2	Control_MR_2
Q9R0B7	Zinc finger protein 346 OS=Mus musculus OX=10090 GN=Znf346 PE=1 SV=1	30.78	Control_MR_2	Control_MR_2
P61982	14-3-3 protein gamma OS=Mus musculus OX=10090 GN=Ywhag PE=1 SV=2	34.45	Control_MR_2	Control_MR_2
Q3UGF1	WD repeat-containing protein 19 OS=Mus musculus OX=10090 GN=Wdr19 PE=1 SV=1	7.48	Control_MR_2	Control_MR_2
Q7TSK7	ADAMTS-like protein 2 OS=Mus musculus OX=10090 GN=Adamtsl2 PE=2 SV=1	22.83	Control_MR_2	Control_MR_2
Q9Z1J2	Serine/threonine-protein kinase Nek4 OS=Mus musculus OX=10090 GN=Nek4 PE=1 SV=1	20.19	Control_MR_2	Control_MR_2
A2A4P0	ATP-dependent RNA helicase DHX8 OS=Mus musculus OX=10090 GN=Dhx8 PE=2 SV=1	23.01	Control_MR_2	Control_MR_2
D2EAC2	Zinc finger BED domain-containing protein 6 OS=Mus musculus OX=10090 GN=Zbed6 PE=1 SV=1	40.52	Control_MR_2	Control_MR_2
Q8C0Y0	Serine/threonine-protein phosphatase 4 regulatory subunit 4 OS=Mus musculus OX=10090 GN=Ppp4r4 PE=1 SV=2	14.78	Control_MR_2	Control_MR_2
O88327	Alpha-catulin OS=Mus musculus OX=10090 GN=Ctnnal1 PE=1 SV=1	64.75	Control_MR_2	Control_MR_2
Q9CR50	RING finger and CHY zinc finger domain-containing protein 1 OS=Mus musculus OX=10090 GN=Rchy1 PE=1 SV=1	29.04	Control_MR_2	Control_MR_2
Q64GA5	Cytosolic phospholipase A2 gamma OS=Mus musculus OX=10090 GN=Pla2g4c PE=1 SV=1	27.31	Control_MR_2	Control_MR_2
Q9JL26	Formin-like protein 1 OS=Mus musculus OX=10090 GN=Fmnl1 PE=1 SV=1	39.32	Control_MR_2	Control_MR_2
O88685	26S proteasome regulatory subunit 6A OS=Mus musculus OX=10090 GN=Psmc3 PE=1 SV=2	25.51	Control_MR_2	Control_MR_2
O88322	Nidogen-2 OS=Mus musculus OX=10090 GN=Nid2 PE=1 SV=2	14.09	Control_MR_2	Control_MR_2
Q9EPK2	Protein XRP2 OS=Mus musculus OX=10090 GN=Rp2 PE=1 SV=3	12.81	Control_MR_2	Control_MR_2
Q9QX29	Short transient receptor potential channel 5 OS=Mus musculus OX=10090 GN=Trpc5 PE=1 SV=2	30.11	Control_MR_2	Control_MR_2
P97819	85/88 kDa calcium-independent phospholipase A2 OS=Mus musculus OX=10090 GN=Pla2g6 PE=1 SV=3	16.49	Control_MR_2	Control_MR_2
Q9WTX7	Four and a half LIM domains protein 5 OS=Mus musculus OX=10090 GN=Fhl5 PE=1 SV=1	53.99	Control_MR_2	Control_MR_2
B2RW38	Cilia- and flagella-associated protein 58 OS=Mus musculus OX=10090 GN=Cfap58 PE=2 SV=1	32.79	Control_MR_2	Control_MR_2
Q91W97	Putative hexokinase HKDC1 OS=Mus musculus OX=10090 GN=Hkdc1 PE=2 SV=1	32.67	Control_MR_2	Control_MR_2
P27870	Proto-oncogene vav OS=Mus musculus OX=10090 GN=Vav1 PE=1 SV=1	35.46	Control_MR_2	Control_MR_2
Q8C196	Carbamoyl-phosphate synthase [ammonia], mitochondrial OS=Mus musculus OX=10090 GN=Cps1 PE=1 SV=2	6.79	Control_MR_2	Control_MR_2
Q7TSJ2	Microtubule-associated protein 6 OS=Mus musculus OX=10090 GN=Map6 PE=1 SV=2	23.36	Control_MR_2	Control_MR_2
P11103	Poly [ADP-ribose] polymerase 1 OS=Mus musculus OX=10090 GN=Parp1 PE=1 SV=3	15.59	Control_MR_2	Control_MR_2
Q8BYK8	Zinc finger CCCH domain-containing protein 6 OS=Mus musculus OX=10090 GN=Zc3h6 PE=2 SV=2	19.54	Control_MR_2	Control_MR_2
Q9QY40	Plexin-B3 OS=Mus musculus OX=10090 GN=Plxnb3 PE=1 SV=2	8.44	Control_MR_2	Control_MR_2
Q9ESP5	Fez family zinc finger protein 2 OS=Mus musculus OX=10090 GN=Fezf2 PE=1 SV=1	2.32	Control_MR_2	Control_MR_2
Q30D77	Collagen alpha-1(XXIV) chain OS=Mus musculus OX=10090 GN=Col24a1 PE=2 SV=2	22.93	Control_MR_2	Control_MR_2
Q9DBR3	Armadillo repeat-containing protein 8 OS=Mus musculus OX=10090 GN=Armc8 PE=1 SV=2	5.05	Control_MR_2	Control_MR_2
Q9DBR0	A-kinase anchor protein 8 OS=Mus musculus OX=10090 GN=Akap8 PE=1 SV=1	29.09	Control_MR_2	Control_MR_2
Q6VH22	Intraflagellar transport protein 172 homolog OS=Mus musculus OX=10090 GN=Ift172 PE=1 SV=1	24.42	Control_MR_2	Control_MR_2
Q99KG3	RNA-binding protein 10 OS=Mus musculus OX=10090 GN=Rbm10 PE=1 SV=1	29.15	Control_MR_2	Control_MR_2
P49290	Eosinophil peroxidase OS=Mus musculus OX=10090 GN=Epx PE=1 SV=2	18.08	Control_MR_2	Control_MR_2
Q8BIK4	Dedicator of cytokinesis protein 9 OS=Mus musculus OX=10090 GN=Dock9 PE=1 SV=2	15.16	Control_MR_2	Control_MR_2
Q7TSI3	Serine/threonine-protein phosphatase 6 regulatory subunit 1 OS=Mus musculus OX=10090 GN=Ppp6r1 PE=1 SV=1	7.67	Control_MR_2	Control_MR_2
Q9QY30	Bile salt export pump OS=Mus musculus OX=10090 GN=Abcb11 PE=1 SV=2	10.24	Control_MR_2	Control_MR_2
Q8CGC7	Bifunctional glutamate/proline--tRNA ligase OS=Mus musculus OX=10090 GN=Eprs PE=1 SV=4	18.5	Control_MR_2	Control_MR_2
O35595	Protein patched homolog 2 OS=Mus musculus OX=10090 GN=Ptch2 PE=2 SV=2	7.77	Control_MR_2	Control_MR_2
Q9DC22	DDB1- and CUL4-associated factor 6 OS=Mus musculus OX=10090 GN=Dcaf6 PE=1 SV=1	18.02	Control_MR_2	Control_MR_2
Q9WU78	Programmed cell death 6-interacting protein OS=Mus musculus OX=10090 GN=Pdcd6ip PE=1 SV=3	46.45	Control_MR_2	Control_MR_2
O54998	Peptidyl-prolyl cis-trans isomerase FKBP7 OS=Mus musculus OX=10090 GN=Fkbp7 PE=1 SV=1	41.85	Control_MR_2	Control_MR_2
Q7TSH8	Transmembrane protein 94 OS=Mus musculus OX=10090 GN=Tmem94 PE=1 SV=1	41.83	Control_MR_2	Control_MR_2
Q64133	Amine oxidase [flavin-containing] A OS=Mus musculus OX=10090 GN=Maoa PE=1 SV=3	13.02	Control_MR_2	Control_MR_2
Q9QUK4	Baculoviral IAP repeat-containing protein 1b OS=Mus musculus OX=10090 GN=Naip2 PE=1 SV=2	23.85	Control_MR_2	Control_MR_2
Q80XB4	Nebulin-related-anchoring protein OS=Mus musculus OX=10090 GN=Nrap PE=1 SV=3	36.07	Control_MR_2	Control_MR_2
Q7TSH2	Phosphorylase b kinase regulatory subunit beta OS=Mus musculus OX=10090 GN=Phkb PE=1 SV=1	29.48	Control_MR_2	Control_MR_2
Q99246	Voltage-dependent L-type calcium channel subunit alpha-1D OS=Mus musculus OX=10090 GN=Cacna1d PE=1 SV=3	20.37	Control_MR_2	Control_MR_2
P48193	Protein 4.1 OS=Mus musculus OX=10090 GN=Epb41 PE=1 SV=2	41.38	Control_MR_2	Control_MR_2
Q9D684	Ras and Rab interactor 2 OS=Mus musculus OX=10090 GN=Rin2 PE=1 SV=3	7.9	Control_MR_2	Control_MR_2
O35227	Disintegrin and metalloproteinase domain-containing protein 7 OS=Mus musculus OX=10090 GN=Adam7 PE=2 SV=2	16.2	Control_MR_2	Control_MR_2
Q9ESN6	Tripartite motif-containing protein 2 OS=Mus musculus OX=10090 GN=Trim2 PE=1 SV=1	50.05	Control_MR_2	Control_MR_2
Q8JZQ2	AFG3-like protein 2 OS=Mus musculus OX=10090 GN=Afg3l2 PE=1 SV=1	61.39	Control_MR_2	Control_MR_2
P51881	ADP/ATP translocase 2 OS=Mus musculus OX=10090 GN=Slc25a5 PE=1 SV=3	3.22	Control_MR_2	Control_MR_2
Q8CGB6	Tensin-2 OS=Mus musculus OX=10090 GN=Tns2 PE=1 SV=1	3.89	Control_MR_2	Control_MR_2
O54988	STE20-like serine/threonine-protein kinase OS=Mus musculus OX=10090 GN=Slk PE=1 SV=2	21.68	Control_MR_2	Control_MR_2
Q9WU67	Lymphocyte antigen 6I OS=Mus musculus OX=10090 GN=Ly6i PE=2 SV=1	62.06	Control_MR_2	Control_MR_2
Q2TBA3	Mucosa-associated lymphoid tissue lymphoma translocation protein 1 homolog OS=Mus musculus OX=10090 GN=Malt1 PE=1 SV=2	37.38	Control_MR_2	Control_MR_2
Q9WTU3	Sodium channel protein type 8 subunit alpha OS=Mus musculus OX=10090 GN=Scn8a PE=1 SV=1	20.37	Control_MR_2	Control_MR_2
Q80TZ9	Arginine-glutamic acid dipeptide repeats protein OS=Mus musculus OX=10090 GN=Rere PE=1 SV=3	17.01	Control_MR_2	Control_MR_2
Q64487	Receptor-type tyrosine-protein phosphatase delta OS=Mus musculus OX=10090 GN=Ptprd PE=1 SV=3	12.37	Control_MR_2	Control_MR_2
Q91VU8	Prostate tumor-overexpressed gene 1 protein homolog OS=Mus musculus OX=10090 GN=Ptov1 PE=1 SV=1	3.78	Control_MR_2	Control_MR_2
P52963	Band 4.1-like protein 4A OS=Mus musculus OX=10090 GN=Epb41l4a PE=2 SV=2	34.36	Control_MR_2	Control_MR_2
Q8BYH3	tRNA:m(4)X modification enzyme TRM13 homolog OS=Mus musculus OX=10090 GN=Trmt13 PE=2 SV=1	15.22	Control_MR_2	Control_MR_2
O35216	Histone H3-like centromeric protein A OS=Mus musculus OX=10090 GN=Cenpa PE=2 SV=1	39.98	Control_MR_2	Control_MR_2
P50429	Arylsulfatase B OS=Mus musculus OX=10090 GN=Arsb PE=1 SV=3	51.75	Control_MR_2	Control_MR_2
Q8R2G6	Coiled-coil domain-containing protein 80 OS=Mus musculus OX=10090 GN=Ccdc80 PE=1 SV=2	60.3	Control_MR_2	Control_MR_2
Q8R2G4	Ecto-ADP-ribosyltransferase 3 OS=Mus musculus OX=10090 GN=Art3 PE=1 SV=2	25.58	Control_MR_2	Control_MR_2
Q80TY4	Suppression of tumorigenicity 18 protein OS=Mus musculus OX=10090 GN=St18 PE=2 SV=2	14.69	Control_MR_2	Control_MR_2
Q8C0T9	Adenylate cyclase type 10 OS=Mus musculus OX=10090 GN=Adcy10 PE=1 SV=2	3.65	Control_MR_2	Control_MR_2
Q6NVE3	Spindlin-2C OS=Mus musculus OX=10090 GN=Spin2c PE=2 SV=1	30.41	Control_MR_2	Control_MR_2
Q3UQ44	Ras GTPase-activating-like protein IQGAP2 OS=Mus musculus OX=10090 GN=Iqgap2 PE=1 SV=2	45.21	Control_MR_2	Control_MR_2
Q80TY0	Formin-binding protein 1 OS=Mus musculus OX=10090 GN=Fnbp1 PE=1 SV=2	66.03	Control_MR_2	Control_MR_2
P59328	WD repeat and HMG-box DNA-binding protein 1 OS=Mus musculus OX=10090 GN=Wdhd1 PE=1 SV=2	51.36	Control_MR_2	Control_MR_2
Q7TSF1	Desmoglein-1-beta OS=Mus musculus OX=10090 GN=Dsg1b PE=1 SV=1	5.95	Control_MR_2	Control_MR_2
Q8BYG9	Ephrin type-A receptor 10 OS=Mus musculus OX=10090 GN=Epha10 PE=2 SV=2	31.88	Control_MR_2	Control_MR_2
Q91W50	Cold shock domain-containing protein E1 OS=Mus musculus OX=10090 GN=Csde1 PE=1 SV=1	12.83	Control_MR_2	Control_MR_2
Q9D666	SUN domain-containing protein 1 OS=Mus musculus OX=10090 GN=Sun1 PE=1 SV=2	16.96	Control_MR_2	Control_MR_2
Q5QNQ6	Oxysterol-binding protein 2 OS=Mus musculus OX=10090 GN=Osbp2 PE=1 SV=1	5.19	Control_MR_2	Control_MR_2
Q9CU65	Zinc finger MYM-type protein 2 OS=Mus musculus OX=10090 GN=Zmym2 PE=1 SV=3	8.19	Control_MR_2	Control_MR_2
P60840	Alpha-endosulfine OS=Mus musculus OX=10090 GN=Ensa PE=1 SV=1	25.46	Control_MR_2	Control_MR_2
Q9CU62	Structural maintenance of chromosomes protein 1A OS=Mus musculus OX=10090 GN=Smc1a PE=1 SV=4	36.97	Control_MR_2	Control_MR_2
Q0VEJ0	Centrosomal protein of 76 kDa OS=Mus musculus OX=10090 GN=Cep76 PE=1 SV=1	30.38	Control_MR_2	Control_MR_2
Q04592	Proprotein convertase subtilisin/kexin type 5 OS=Mus musculus OX=10090 GN=Pcsk5 PE=1 SV=3	19.63	Control_MR_2	Control_MR_2
Q6PB66	Leucine-rich PPR motif-containing protein, mitochondrial OS=Mus musculus OX=10090 GN=Lrpprc PE=1 SV=2	22.67	Control_MR_2	Control_MR_2
B1AUH1	Receptor-type tyrosine-protein phosphatase U OS=Mus musculus OX=10090 GN=Ptpru PE=1 SV=1	34.58	Control_MR_2	Control_MR_2
Q64464	Cytochrome P450 3A13 OS=Mus musculus OX=10090 GN=Cyp3a13 PE=1 SV=1	14.02	Control_MR_2	Control_MR_2
Q80U93	Nuclear pore complex protein Nup214 OS=Mus musculus OX=10090 GN=Nup214 PE=1 SV=2	11.57	Control_MR_2	Control_MR_2
Q9QXN3	Activating signal cointegrator 1 OS=Mus musculus OX=10090 GN=Trip4 PE=1 SV=2	14.96	Control_MR_2	Control_MR_2
P35710	Transcription factor SOX-5 OS=Mus musculus OX=10090 GN=Sox5 PE=1 SV=2	23.82	Control_MR_2	Control_MR_2
P23116	Eukaryotic translation initiation factor 3 subunit A OS=Mus musculus OX=10090 GN=Eif3a PE=1 SV=5	39.15	Control_MR_2	Control_MR_2
Q2EG98	Polycystic kidney disease protein 1-like 3 OS=Mus musculus OX=10090 GN=Pkd1l3 PE=1 SV=2	8.55	Control_MR_2	Control_MR_2
P31001	Desmin OS=Mus musculus OX=10090 GN=Des PE=1 SV=3	42.68	Control_MR_2	Control_MR_2
Q9DBM2	Peroxisomal bifunctional enzyme OS=Mus musculus OX=10090 GN=Ehhadh PE=1 SV=4	23.86	Control_MR_2	Control_MR_2
[truncated: 330 more rows]
